# Supplementary material for: KRAS silencing alters chromatin physical organization and transcriptional activity in colorectal cancer cells
Source: Research Square preprint supplement (doi:10.21203/rs.3.rs-3752760/v3), 2024-04-16
Supplement: Supplementary file 2 [file 907094e9c6fdfc1ba23a08e6.xlsx]

## Sheet: ListDEG
	HCT116				SW480				LS174T
up-regulated genes	24hvs48h		24hvs72h		24hvs48h		24hvs72h		24hvs48h		24hvs72h
down-regulated genes	siControl	siKRAS	siControl	siKRAS	siControl	siKRAS	siControl	siKRAS	siControl	siKRAS	siControl	siKRAS
	ENSG00000213860	ENSG00000237296	ENSG00000187984	ENSG00000134321	ENSG00000288859	ENSG00000253797	ENSG00000288622	ENSG00000002933	ENSG00000162520	ENSG00000271793	ENSG00000259040	ENSG00000256861
	ENSG00000256861	ENSG00000269693	ENSG00000261611	ENSG00000100342	ENSG00000253797	ENSG00000285283	ENSG00000253797	ENSG00000160870	ENSG00000290183	ENSG00000288622	ENSG00000205923	ENSG00000271793
	ENSG00000288825	ENSG00000264668	ENSG00000256861	ENSG00000137959	ENSG00000225108	ENSG00000002933	ENSG00000225108	ENSG00000285283	ENSG00000197238	ENSG00000162520	ENSG00000291316	ENSG00000261116
	ENSG00000269693	ENSG00000198211	ENSG00000214447	ENSG00000291316	ENSG00000275882	ENSG00000160870	ENSG00000275882	ENSG00000015413	ENSG00000225108	ENSG00000256861	ENSG00000290230	ENSG00000259623
	ENSG00000239704	ENSG00000204789	ENSG00000288698	ENSG00000204789	ENSG00000270181	ENSG00000130487	ENSG00000213860	ENSG00000196126	ENSG00000290230	ENSG00000225108	ENSG00000213860	ENSG00000283239
	ENSG00000275882	ENSG00000281490	ENSG00000187951	ENSG00000128284	ENSG00000214447	ENSG00000270181	ENSG00000132010	ENSG00000146122	ENSG00000267303	ENSG00000284057	ENSG00000267303	ENSG00000196826
	ENSG00000205923	ENSG00000213626	ENSG00000286185	ENSG00000202198		ENSG00000214447		ENSG00000288637		ENSG00000268173		ENSG00000285238
	ENSG00000285304	ENSG00000168542	ENSG00000180747	ENSG00000279364		ENSG00000267520		ENSG00000168032		ENSG00000278996		ENSG00000286185
		ENSG00000198520	ENSG00000278996	ENSG00000288550				ENSG00000185630		ENSG00000286185
		ENSG00000099250	ENSG00000256500	ENSG00000259040				ENSG00000283496
		ENSG00000168961		ENSG00000137965				ENSG00000154269
		ENSG00000130303		ENSG00000168542				ENSG00000265107
		ENSG00000105523		ENSG00000130303				ENSG00000145721
		ENSG00000100100		ENSG00000221963				ENSG00000116132
		ENSG00000143365		ENSG00000099250				ENSG00000160808
		ENSG00000104081		ENSG00000168961				ENSG00000172116
		ENSG00000177694		ENSG00000198520				ENSG00000106565
		ENSG00000129946		ENSG00000089127				ENSG00000169583
		ENSG00000167183		ENSG00000119922				ENSG00000107317
		ENSG00000187634		ENSG00000185885				ENSG00000169116
		ENSG00000119922		ENSG00000119917				ENSG00000070601
		ENSG00000089472		ENSG00000105523				ENSG00000181333
		ENSG00000256043		ENSG00000135114				ENSG00000171360
		ENSG00000135114		ENSG00000184292				ENSG00000213886
		ENSG00000197558		ENSG00000178685				ENSG00000170373
		ENSG00000250722		ENSG00000100100				ENSG00000196408
		ENSG00000015568		ENSG00000165949				ENSG00000163817
		ENSG00000158373		ENSG00000187634				ENSG00000115221
		ENSG00000166046		ENSG00000089472				ENSG00000250644
		ENSG00000172348		ENSG00000167183				ENSG00000171551
		ENSG00000100027		ENSG00000129946				ENSG00000050165
		ENSG00000070731		ENSG00000108846				ENSG00000133116
		ENSG00000119508		ENSG00000168016				ENSG00000128165
		ENSG00000168874		ENSG00000149131				ENSG00000237988
		ENSG00000165029		ENSG00000015568				ENSG00000002726
		ENSG00000163683		ENSG00000256043				ENSG00000121858
		ENSG00000119917		ENSG00000053747				ENSG00000185585
		ENSG00000165072		ENSG00000104081				ENSG00000147408
		ENSG00000182568		ENSG00000185745				ENSG00000168743
		ENSG00000108846		ENSG00000250722				ENSG00000146411
		ENSG00000114796		ENSG00000137628				ENSG00000095587
		ENSG00000180573		ENSG00000154065				ENSG00000099953
		ENSG00000146411		ENSG00000135480				ENSG00000170786
		ENSG00000167608		ENSG00000107201				ENSG00000126709
		ENSG00000132561		ENSG00000163683				ENSG00000079385
		ENSG00000130066		ENSG00000132561				ENSG00000085563
		ENSG00000053747		ENSG00000126709				ENSG00000055118
		ENSG00000182732		ENSG00000048052				ENSG00000171368
		ENSG00000285976		ENSG00000285976				ENSG00000167608
		ENSG00000117472		ENSG00000174808				ENSG00000254126
		ENSG00000266714		ENSG00000165029				ENSG00000013364
		ENSG00000154165		ENSG00000127415				ENSG00000151079
		ENSG00000111801		ENSG00000167608				ENSG00000069424
		ENSG00000178999		ENSG00000266714				ENSG00000123933
		ENSG00000102384		ENSG00000117472				ENSG00000164761
		ENSG00000125740		ENSG00000142303				ENSG00000021300
		ENSG00000268350		ENSG00000161681				ENSG00000184292
		ENSG00000186919		ENSG00000165072				ENSG00000154556
		ENSG00000167774		ENSG00000223764				ENSG00000156113
		ENSG00000285283		ENSG00000138646				ENSG00000167011
		ENSG00000260342		ENSG00000164039				ENSG00000197859
		ENSG00000225108		ENSG00000130066				ENSG00000185269
		ENSG00000286185		ENSG00000122884				ENSG00000108602
		ENSG00000283782		ENSG00000213928				ENSG00000007129
				ENSG00000125740				ENSG00000103888
				ENSG00000275895				ENSG00000070669
				ENSG00000215695				ENSG00000075213
				ENSG00000214447				ENSG00000153029
				ENSG00000256514				ENSG00000137502
				ENSG00000285283				ENSG00000085741
				ENSG00000262304				ENSG00000179344
				ENSG00000257767				ENSG00000127831
								ENSG00000237412
								ENSG00000163346
								ENSG00000134755
								ENSG00000001617
								ENSG00000163328
								ENSG00000102547
								ENSG00000078579
								ENSG00000078081
								ENSG00000196517
								ENSG00000168209
								ENSG00000147251
								ENSG00000137941
								ENSG00000130707
								ENSG00000134057
								ENSG00000112742
								ENSG00000169679
								ENSG00000135476
								ENSG00000126787
								ENSG00000170312
								ENSG00000139734
								ENSG00000146670
								ENSG00000163507
								ENSG00000137812
								ENSG00000131153
								ENSG00000137807
								ENSG00000075218
								ENSG00000145386
								ENSG00000085840
								ENSG00000102384
								ENSG00000138180
								ENSG00000121152
								ENSG00000072571
								ENSG00000143476
								ENSG00000111206
								ENSG00000167900
								ENSG00000101412
								ENSG00000169607
								ENSG00000076382
								ENSG00000138778
								ENSG00000144063
								ENSG00000122952
								ENSG00000118193
								ENSG00000166851
								ENSG00000112984
								ENSG00000267519
								ENSG00000092853
								ENSG00000131747
								ENSG00000168078
								ENSG00000117724
								ENSG00000109805
								ENSG00000147536
								ENSG00000068489
								ENSG00000183856
								ENSG00000175063
								ENSG00000142731
								ENSG00000094804
								ENSG00000157456
								ENSG00000129195
								ENSG00000166803
								ENSG00000163808
								ENSG00000127564
								ENSG00000135318
								ENSG00000066279
								ENSG00000237649
								ENSG00000065328
								ENSG00000090889
								ENSG00000093009
								ENSG00000165244
								ENSG00000176890
								ENSG00000175322
								ENSG00000051341
								ENSG00000123485
								ENSG00000089685
								ENSG00000011426
								ENSG00000075702
								ENSG00000186185
								ENSG00000186871
								ENSG00000115163
								ENSG00000134690
								ENSG00000101057
								ENSG00000276043
								ENSG00000196584
								ENSG00000171241
								ENSG00000174371
								ENSG00000171848
								ENSG00000117399
								ENSG00000139318
								ENSG00000133083
								ENSG00000165480
								ENSG00000165891
								ENSG00000135451
								ENSG00000085999
								ENSG00000178999
								ENSG00000148773
								ENSG00000129173
								ENSG00000152253
								ENSG00000125740
								ENSG00000111665
								ENSG00000114315
								ENSG00000285976
								ENSG00000229665
								ENSG00000277957

## Sheet: HCT116_siKRAS_24vs48h_BP_UP
Category	Term	Count	%	PValue	Genes	List Total	Pop Hits	Pop Total	Fold Enrichment	Bonferroni	Benjamini	FDR
GOTERM_BP_DIRECT	GO:0009615~response to virus	4	7.8431372549019605	0.0018392580426043312	ENSG00000119922, ENSG00000130303, ENSG00000119917, ENSG00000135114	44	110	19462	16.084297520661156	0.49116385028595344	0.6750077016357895	0.6750077016357895
GOTERM_BP_DIRECT	GO:0051607~defense response to virus	4	7.8431372549019605	0.015209693608735423	ENSG00000119922, ENSG00000130303, ENSG00000119917, ENSG00000135114	44	236	19462	7.496918335901387	0.9963928701948636	1.0	1.0
GOTERM_BP_DIRECT	GO:0032489~regulation of Cdc42 protein signal transduction	2	3.9215686274509802	0.017542518418308565	ENSG00000099250, ENSG00000165029	44	8	19462	110.57954545454545	0.9984893930786815	1.0	1.0
GOTERM_BP_DIRECT	GO:0007229~integrin-mediated signaling pathway	3	5.88235294117647	0.02584615969181228	ENSG00000168542, ENSG00000099250, ENSG00000053747	44	113	19462	11.742960579243764	0.9999329637475978	1.0	1.0
GOTERM_BP_DIRECT	GO:0035457~cellular response to interferon-alpha	2	3.9215686274509802	0.026200696290253317	ENSG00000119922, ENSG00000119917	44	12	19462	73.71969696969697	0.9999413468012415	1.0	1.0
GOTERM_BP_DIRECT	GO:0048008~platelet-derived growth factor receptor signaling pathway	2	3.9215686274509802	0.07044762024763505	ENSG00000119508, ENSG00000099250	44	33	19462	26.80716253443526	0.9999999999977275	1.0	1.0
GOTERM_BP_DIRECT	GO:0030522~intracellular receptor signaling pathway	2	3.9215686274509802	0.07250489300325444	ENSG00000119508, ENSG00000143365	44	34	19462	26.018716577540108	0.9999999999989923	1.0	1.0
GOTERM_BP_DIRECT	GO:0045071~negative regulation of viral genome replication	2	3.9215686274509802	0.09484341567642317	ENSG00000130303, ENSG00000135114	44	45	19462	19.65858585858586	0.9999999999999999	1.0	1.0

## Sheet: HCT116_siKRAS_24vs72h_BP_UP
Category	Term	Count	%	PValue	Genes	List Total	Pop Hits	Pop Total	Fold Enrichment	Bonferroni	Benjamini	FDR
GOTERM_BP_DIRECT	GO:0051607~defense response to virus	15	24.193548387096776	1.1521149572136212E-15	ENSG00000130303, ENSG00000165949, ENSG00000137628, ENSG00000137959, ENSG00000134321, ENSG00000138646, ENSG00000213928, ENSG00000135114, ENSG00000126709, ENSG00000119922, ENSG00000089127, ENSG00000119917, ENSG00000185885, ENSG00000185745, ENSG00000107201	53	236	19462	23.33946274384394	4.996003610813204E-13	5.184517307461295E-13	5.149953858744887E-13
GOTERM_BP_DIRECT	GO:0009615~response to virus	11	17.741935483870968	2.843629800752967E-13	ENSG00000119922, ENSG00000130303, ENSG00000137628, ENSG00000089127, ENSG00000134321, ENSG00000119917, ENSG00000137965, ENSG00000185885, ENSG00000185745, ENSG00000107201, ENSG00000135114	53	110	19462	36.72075471698113	1.2794765247292617E-10	6.398167051694176E-11	6.355512604682882E-11
GOTERM_BP_DIRECT	GO:0045071~negative regulation of viral genome replication	7	11.29032258064516	2.0315235786004156E-9	ENSG00000178685, ENSG00000130303, ENSG00000089127, ENSG00000134321, ENSG00000185885, ENSG00000185745, ENSG00000135114	53	45	19462	57.121174004192866	9.14185210310059E-7	3.0472853679006234E-7	3.0269701321146193E-7
GOTERM_BP_DIRECT	GO:0045087~innate immune response	13	20.967741935483872	8.200910762328747E-8	ENSG00000130303, ENSG00000165949, ENSG00000149131, ENSG00000137628, ENSG00000134321, ENSG00000138646, ENSG00000135114, ENSG00000126709, ENSG00000119922, ENSG00000089127, ENSG00000119917, ENSG00000100342, ENSG00000107201	53	635	19462	7.517634823948892	3.690341899242888E-5	9.22602460761984E-6	9.164517776902375E-6
GOTERM_BP_DIRECT	GO:0060337~type I interferon signaling pathway	4	6.451612903225806	4.5126040380075584E-4	ENSG00000165949, ENSG00000089127, ENSG00000185885, ENSG00000213928	53	56	19462	26.22911051212938	0.18381400389477853	0.03407112964200039	0.03384398877772038
GOTERM_BP_DIRECT	GO:0035457~cellular response to interferon-alpha	3	4.838709677419355	4.5428172856000514E-4	ENSG00000119922, ENSG00000089127, ENSG00000119917	53	12	19462	91.80188679245283	0.18492343518413046	0.03407112964200039	0.03384398877772038
GOTERM_BP_DIRECT	GO:0042157~lipoprotein metabolic process	3	4.838709677419355	0.0015630286408241738	ENSG00000128284, ENSG00000221963, ENSG00000100342	53	22	19462	50.073756432246995	0.5053541119022738	0.10048041262441118	0.0998105432069151
GOTERM_BP_DIRECT	GO:0006869~lipid transport	4	6.451612903225806	0.0020317966578245507	ENSG00000128284, ENSG00000221963, ENSG00000100342, ENSG00000165029	53	94	19462	15.6258530710558	0.59957892600196	0.11428856200263098	0.11352663825594676
GOTERM_BP_DIRECT	GO:0007229~integrin-mediated signaling pathway	4	6.451612903225806	0.003424847040840898	ENSG00000168542, ENSG00000099250, ENSG00000142303, ENSG00000053747	53	113	19462	12.998497244949073	0.7864376314424553	0.17124235204204488	0.1701007363617646
GOTERM_BP_DIRECT	GO:0060700~regulation of ribonuclease activity	2	3.225806451612903	0.01328952684655721	ENSG00000089127, ENSG00000135114	53	5	19462	146.88301886792453	0.9975712541916684	0.5980287080950744	0.5940418500411073
GOTERM_BP_DIRECT	GO:0070106~interleukin-27-mediated signaling pathway	2	3.225806451612903	0.01855670026113684	ENSG00000089127, ENSG00000135114	53	7	19462	104.91644204851752	0.999781552787886	0.7591377379555979	0.7540768197025606
GOTERM_BP_DIRECT	GO:0032489~regulation of Cdc42 protein signal transduction	2	3.225806451612903	0.021179936013921253	ENSG00000099250, ENSG00000165029	53	8	19462	91.80188679245282	0.9999344929036988	0.7678707875891186	0.7627516490051912
GOTERM_BP_DIRECT	GO:0050688~regulation of defense response to virus	2	3.225806451612903	0.02379629477418325	ENSG00000138646, ENSG00000185745	53	9	19462	81.60167714884696	0.9999803572057014	0.7678707875891186	0.7627516490051912
GOTERM_BP_DIRECT	GO:0098586~cellular response to virus	3	4.838709677419355	0.026691378069318712	ENSG00000168961, ENSG00000126709, ENSG00000089127	53	95	19462	11.596027805362462	0.9999948387280758	0.7678707875891186	0.7627516490051912
GOTERM_BP_DIRECT	GO:1900246~positive regulation of RIG-I signaling pathway	2	3.225806451612903	0.02900845197558893	ENSG00000137628, ENSG00000135114	53	11	19462	66.76500857632932	0.9999982341560256	0.7678707875891186	0.7627516490051912
GOTERM_BP_DIRECT	GO:0035455~response to interferon-alpha	2	3.225806451612903	0.02900845197558893	ENSG00000130303, ENSG00000185885	53	11	19462	66.76500857632932	0.9999982341560256	0.7678707875891186	0.7627516490051912
GOTERM_BP_DIRECT	GO:0035456~response to interferon-beta	2	3.225806451612903	0.02900845197558893	ENSG00000130303, ENSG00000185885	53	11	19462	66.76500857632932	0.9999982341560256	0.7678707875891186	0.7627516490051912
GOTERM_BP_DIRECT	GO:0032755~positive regulation of interleukin-6 production	3	4.838709677419355	0.03209433502843857	ENSG00000168961, ENSG00000288550, ENSG00000107201	53	105	19462	10.491644204851752	0.999999578435269	0.8003515039772071	0.7950158272840258
GOTERM_BP_DIRECT	GO:0032760~positive regulation of tumor necrosis factor production	3	4.838709677419355	0.03379261905681541	ENSG00000168961, ENSG00000089127, ENSG00000107201	53	108	19462	10.20020964360587	0.999999808725159	0.8003515039772071	0.7950158272840258
GOTERM_BP_DIRECT	GO:0071639~positive regulation of monocyte chemotactic protein-1 production	2	3.225806451612903	0.03935101722293276	ENSG00000168961, ENSG00000089127	53	15	19462	48.96100628930817	0.9999999857397464	0.885397887515987	0.8794952349325472
GOTERM_BP_DIRECT	GO:0071360~cellular response to exogenous dsRNA	2	3.225806451612903	0.049585514506711	ENSG00000185745, ENSG00000107201	53	19	19462	38.65342601787488	0.9999999998849541	1.0	0.9955456570155902
GOTERM_BP_DIRECT	GO:0034341~response to interferon-gamma	2	3.225806451612903	0.06973472315668207	ENSG00000130303, ENSG00000185885	53	27	19462	27.200559049615652	0.9999999999999926	1.0	0.9955456570155902
GOTERM_BP_DIRECT	GO:0090050~positive regulation of cell migration involved in sprouting angiogenesis	2	3.225806451612903	0.089464803315987	ENSG00000048052, ENSG00000099250	53	35	19462	20.983288409703505	1.0	1.0	0.9955456570155902
GOTERM_BP_DIRECT	GO:0030198~extracellular matrix organization	3	4.838709677419355	0.09158505315273689	ENSG00000168542, ENSG00000132561, ENSG00000142303	53	190	19462	5.798013902681231	1.0	1.0	0.9955456570155902
GOTERM_BP_DIRECT	GO:0042113~B cell activation	2	3.225806451612903	0.09675727755764754	ENSG00000130303, ENSG00000048052	53	38	19462	19.32671300893744	1.0	1.0	0.9955456570155902
