# Supplementary material for: KRAS silencing alters chromatin physical organization and transcriptional activity in colorectal cancer cells
Source: Research Square preprint supplement (doi:10.21203/rs.3.rs-3752760/v3), 2024-04-16
Supplement: Supplementary file 3 [file eacda2a49f5bd73592806d8b.xlsx]

## Sheet: HCT116_Allproteins_3DsiKvssiC
3D siKRAS 3	3D siKRAS 1	3D siKRAS 2	3D NT 3	3D NT 1	3D NT 2	C: Only identified by site	C: Reverse	C: Potential contaminant	C: GOBP name	C: GOMF name	C: GOCC name	C: KEGG pathway name	C: Student's T-test Significant 3D siKRAS_3D NT	C: Student's T-test significant	N: Peptides	N: Razor + unique peptides	N: Unique peptides	N: Sequence coverage [%]	N: Unique + razor sequence coverage [%]	N: Unique sequence coverage [%]	N: Mol. weight [kDa]	N: Q-value	N: Score	N: Intensity	N: MS/MS Count	N: -Log Student's T-test p-value 3D siKRAS_3D NT	N: Student's T-test q-value 3D siKRAS_3D NT	N: Student's T-test Difference 3D siKRAS_3D NT	N: Student's T-test Test statistic 3D siKRAS_3D NT	T: Protein IDs	T: Majority protein IDs	T: id	T: Uniprot IDs	T: Uniprot name	T: Uniprot full protein name	T: Uniprot short protein name	T: Gene name
22.4858	21.2949	20.7507	1	1	1				ATP biosynthetic process;cristae formation;mitochondrial ATP synthesis coupled proton transport;proton transport	transmembrane transporter activity	extracellular exosome;integral component of membrane;mitochondrial inner membrane;mitochondrial proton-transporting ATP synthase complex;mitochondrial proton-transporting ATP synthase complex, coupling factor F(o);mitochondrion;nucleoplasm;nucleus	Metabolic pathways;Oxidative phosphorylation;Thermogenesis			3	1	1	39.4	13.8	13.8	10.918	0.0010079	3.6725	168510000	10	5.63332	1	20.5105	40.0328	sp|P56134|ATPK_HUMAN;tr|C9JU26|C9JU26_HUMAN	sp|P56134|ATPK_HUMAN;tr|C9JU26|C9JU26_HUMAN	1859	P56134	ATPK_HUMAN	ATP synthase subunit f, mitochondrial		ATP5J2
18.9633	16.7211	18.1094	1	1	1				anaphase-promoting complex-dependent catabolic process;antigen processing and presentation of exogenous peptide antigen via MHC class I, TAP-dependent;Fc-epsilon receptor signaling pathway;humoral immune response;MAPK cascade;negative regulation of canonical Wnt signaling pathway;negative regulation of G2/M transition of mitotic cell cycle;negative regulation of ubiquitin-protein ligase activity …	threonine-type endopeptidase activity	cytosol;nucleoplasm;proteasome complex;proteasome core complex;proteasome core complex, beta-subunit complex;spermatoproteasome complex	Proteasome			2	2	2	9.9	9.9	9.9	28.936	0.001006	3.6442	20866000	5	4.88026	1	16.9312	25.9136	sp|P40306|PSB10_HUMAN;tr|J3QQN1|J3QQN1_HUMAN	sp|P40306|PSB10_HUMAN;tr|J3QQN1|J3QQN1_HUMAN	1516	P40306	PSB10_HUMAN	Proteasome subunit beta type-10		PSMB10
16.8285	17.3978	16.1037	1	1	1				ribosomal large subunit assembly	RNA binding;rRNA binding	nucleolus;nucleus;preribosome, large subunit precursor				5	5	5	18.2	18.2	18.2	53.193	0	33.09	66090000	13	5.72177	1	15.7767	42.1282	sp|Q9NQ55|SSF1_HUMAN;tr|A0A0A6YYI3|A0A0A6YYI3_HUMAN;tr|A0A0B4J1V8|A0A0B4J1V8_HUMAN;tr|A8MV53|A8MV53_HUMAN;tr|H7C446|H7C446_HUMAN;tr|C9J3W3|C9J3W3_HUMAN	sp|Q9NQ55|SSF1_HUMAN;tr|A0A0A6YYI3|A0A0A6YYI3_HUMAN;tr|A0A0B4J1V8|A0A0B4J1V8_HUMAN;tr|A8MV53|A8MV53_HUMAN;tr|H7C446|H7C446_HUMAN	4651	Q9NQ55	SSF1_HUMAN	Suppressor of SWI4 1 homolog	sf-1	PPAN
17.3073	15.0323	17.3852	1	1	1				negative regulation of peptidyl-lysine crotonylation;random inactivation of X chromosome;regulation of transcription, DNA-templated;spermatid development;spermatogenesis;transcription, DNA-templated	chromatin binding;crotonyl-CoA hydratase activity;methylated histone binding;protein binding, bridging;transcription corepressor activity	chromosome;nuclear body;nuclear speck;nucleoplasm;nucleus				2	2	2	4.7	4.7	4.7	66.481	0	7.6303	23179000	7	4.44894	1	15.5749	20.1838	sp|Q9Y232|CDYL1_HUMAN;tr|C9JQG7|C9JQG7_HUMAN	sp|Q9Y232|CDYL1_HUMAN;tr|C9JQG7|C9JQG7_HUMAN	5199	Q9Y232	CDYL_HUMAN	Chromodomain Y-like protein {ECO:0000303|PubMed:10192397}	DY-like {ECO:0000303|PubMed:10192397}	CDYL
18.3204	13.47	17.3354	1	1	1				DNA recombination;DNA repair;forebrain morphogenesis;lateral ventricle development;midbrain development;protein deubiquitination;regulation of proteasomal protein catabolic process;regulation of transcription, DNA-templated;transcription, DNA-templated;ubiquitin-dependent protein catabolic process	endopeptidase inhibitor activity;proteasome binding;RNA binding;thiol-dependent ubiquitin-specific protease activity	cytosol;cytosolic proteasome complex;Ino80 complex;mitochondrion;nucleoplasm;nucleus				15	1	1	55.6	7.9	7.9	37.606	0.00042017	4.4894	20651000	2	3.31424	1	15.3753	10.3873	sp|Q9Y5K5|UCHL5_HUMAN;tr|Q5LJA9|Q5LJA9_HUMAN;tr|H0Y6Y4|H0Y6Y4_HUMAN;tr|H0Y4E0|H0Y4E0_HUMAN	sp|Q9Y5K5|UCHL5_HUMAN;tr|Q5LJA9|Q5LJA9_HUMAN;tr|H0Y6Y4|H0Y6Y4_HUMAN;tr|H0Y4E0|H0Y4E0_HUMAN	5354	Q9Y5K5	UCHL5_HUMAN	Ubiquitin carboxyl-terminal hydrolase isozyme L5	CH-L5	UCHL5
16.8943	15.046	16.6907	1	1	1				cardiac right ventricle formation;chromatin remodeling;covalent chromatin modification;muscle cell differentiation;neural retina development;nucleosome disassembly;positive regulation of G2/M transition of mitotic cell cycle;positive regulation of neuroblast proliferation;positive regulation of smooth muscle cell differentiation;positive regulation of transcription, DNA-templated;regulation of li…	chromatin binding;ligand-dependent nuclear receptor binding;ligand-dependent nuclear receptor transcription coactivator activity;nuclear hormone receptor binding;receptor binding;transcription coactivator activity;transcription factor binding	cytoplasm;nBAF complex;npBAF complex;nuclear chromatin;nucleoplasm;nucleus;SWI/SNF complex	Hepatocellular carcinoma;Thermogenesis			9	3	3	20.3	7.9	7.9	55.015	0.00042535	4.77	44179000	0	4.88571	1	15.2103	25.9954	sp|Q6STE5|SMRD3_HUMAN	sp|Q6STE5|SMRD3_HUMAN	3050	Q6STE5	SMRD3_HUMAN	SWI/SNF-related matrix-associated actin-dependent regulator of chromatin subfamily D member 3		SMARCD3
15.5509	15.868	15.7321	1	1	1				activation of GTPase activity;intracellular protein transport;regulation of vesicle fusion	14-3-3 protein binding;GTPase activator activity;Rab GTPase binding	endomembrane system;intracellular				1	1	1	2.6	2.6	2.6	59.08	0.0011816	3.3252	12811000	2	8.04107	1	14.717	160.243	sp|Q9NU19|TB22B_HUMAN	sp|Q9NU19|TB22B_HUMAN	4726	Q9NU19	TB22B_HUMAN	TBC1 domain family member 22B		TBC1D22B
16.106	13.7311	16.892	1	1	1					metal ion binding;RNA binding	nuclear speck;protein complex				6	6	6	11.1	11.1	11.1	106.38	0	17.276	53208000	14	3.97752	1	14.5764	15.3415	sp|Q86VM9|ZCH18_HUMAN;tr|E7ERS3|E7ERS3_HUMAN;tr|H3BRH3|H3BRH3_HUMAN	sp|Q86VM9|ZCH18_HUMAN;tr|E7ERS3|E7ERS3_HUMAN	3231	Q86VM9	ZCH18_HUMAN	Zinc finger CCCH domain-containing protein 18		ZC3H18
22.1941	18.8217	18.9338	1	14.851	1						endosome;mitochondrial inner membrane				5	5	5	32.5	32.5	32.5	16.953	0	21.611	84429000	11	1.40967	1	14.3662	3.02598	sp|Q56VL3|OCAD2_HUMAN;tr|D6RD77|D6RD77_HUMAN;tr|J3KPI9|J3KPI9_HUMAN	sp|Q56VL3|OCAD2_HUMAN	2796	Q56VL3	OCAD2_HUMAN	OCIA domain-containing protein 2		OCIAD2
19.6269	21.4267	17.4532	1	14.9105	1				anaphase-promoting complex-dependent catabolic process;antigen processing and presentation of exogenous peptide antigen via MHC class I, TAP-dependent;Fc-epsilon receptor signaling pathway;MAPK cascade;negative regulation of canonical Wnt signaling pathway;negative regulation of G2/M transition of mitotic cell cycle;negative regulation of ubiquitin-protein ligase activity involved in mitotic cell…	threonine-type endopeptidase activity	cytosol;extracellular exosome;nucleoplasm;proteasome complex;proteasome core complex;proteasome core complex, beta-subunit complex;spermatoproteasome complex	Proteasome			4	4	4	24.2	24.2	24.2	23.264	0	9.2192	65397000	5	1.35649	1	13.8655	2.90255	sp|P28065|PSB9_HUMAN;tr|A2ACR1|A2ACR1_HUMAN;tr|A0A0G2JJA7|A0A0G2JJA7_HUMAN;tr|A2ACR0|A2ACR0_HUMAN;tr|A0A0G2JJQ0|A0A0G2JJQ0_HUMAN;tr|A0A0G2JJ13|A0A0G2JJ13_HUMAN;tr|A0A0G2JHI2|A0A0G2JHI2_HUMAN	sp|P28065|PSB9_HUMAN;tr|A2ACR1|A2ACR1_HUMAN;tr|A0A0G2JJA7|A0A0G2JJA7_HUMAN	1332	P28065	PSB9_HUMAN	Proteasome subunit beta type-9		PSMB9
21.348	18.2936	20.3694	1	1	18.393				positive regulation of epithelial cell migration;positive regulation of epithelial to mesenchymal transition;positive regulation of ERK1 and ERK2 cascade	protein homodimerization activity	extracellular exosome;Golgi membrane				4	4	4	35.1	35.1	35.1	17.218	0	24.783	103800000	12	1.05767	1	13.206	2.25083	sp|Q9H4G4|GAPR1_HUMAN;tr|Q5VZR0|Q5VZR0_HUMAN;tr|A0A087WUM5|A0A087WUM5_HUMAN	sp|Q9H4G4|GAPR1_HUMAN;tr|Q5VZR0|Q5VZR0_HUMAN	4466	Q9H4G4	GAPR1_HUMAN	Golgi-associated plant pathogenesis-related protein 1	APR-1;olgi-associated PR-1 protein	GLIPR2
22.1299	19.3224	20.6759	21.092	1	1						integral component of membrane				2	2	2	19.2	19.2	19.2	17.056	0	7.8086	50006000	4	0.899662	1	13.0121	1.92879	tr|M0R3D4|M0R3D4_HUMAN;sp|Q9UI14|PRAF1_HUMAN;tr|M0QXH1|M0QXH1_HUMAN;tr|M0R1H9|M0R1H9_HUMAN	tr|M0R3D4|M0R3D4_HUMAN;sp|Q9UI14|PRAF1_HUMAN;tr|M0QXH1|M0QXH1_HUMAN;tr|M0R1H9|M0R1H9_HUMAN	5042	M0R3D4	M0R3D4_HUMAN	PRA1 family protein {ECO:0000256|RuleBase:RU363107}
20.6886	19.9579	18.45	1	18.5824	1				mRNA splicing, via spliceosome;RNA metabolic process	RNA binding	cytosol;intracellular ribonucleoprotein complex;membrane;nucleoplasm;nucleus				12	6	6	39.2	22.3	22.3	49.263	0	36.416	118320000	10	1.02188	1	12.838	2.17678	sp|P55795|HNRH2_HUMAN	sp|P55795|HNRH2_HUMAN	1854	P55795	HNRH2_HUMAN	Heterogeneous nuclear ribonucleoprotein H2	nRNP H2	HNRNPH2
18.2337	18.4712	18.553	1	1	15.6958				cellular response to interferon-alpha;defense response to virus;negative regulation of apoptotic process;negative regulation of cell proliferation;response to virus;type I interferon signaling pathway	identical protein binding	cytoplasm;cytosol;mitochondrion				4	4	4	11	11	11	55.984	0	9.6095	33038000	5	1.20109	1	12.5207	2.5555	sp|O14879|IFIT3_HUMAN	sp|O14879|IFIT3_HUMAN	302	O14879	IFIT3_HUMAN	Interferon-induced protein with tetratricopeptide repeats 3	FIT-3	IFIT3
18.8438	15.4956	19.4089	1	14.7591	1				cellular response to exogenous dsRNA;cellular response to type I interferon;defense response to virus;intracellular transport of viral protein in host cell;negative regulation of defense response to virus by host;negative regulation of helicase activity;negative regulation of protein binding;negative regulation of viral genome replication;positive regulation of viral genome replication;response t…	RNA binding	cytoplasm;cytosol;host cell	Hepatitis C			5	5	4	13.4	13.4	11.3	55.36	0	19.257	88617000	6	1.22051	1	12.3297	2.59784	sp|P09914|IFIT1_HUMAN	sp|P09914|IFIT1_HUMAN	1002	P09914	IFIT1_HUMAN	Interferon-induced protein with tetratricopeptide repeats 1	FIT-1	IFIT1
19.3425	16.7758	18.2615	1	15.4742	1				metabolic process	catalytic activity					6	6	6	19.8	19.8	19.8	63.652	0	16.502	45898000	9	1.18469	1	12.3019	2.51997	tr|E9PF16|E9PF16_HUMAN;sp|Q96CM8|ACSF2_HUMAN;tr|D6RF87|D6RF87_HUMAN	tr|E9PF16|E9PF16_HUMAN;sp|Q96CM8|ACSF2_HUMAN	3824	E9PF16	E9PF16_HUMAN			ACSF2
21.8608	19.6767	15.0678	1	18.1403	1				actin cytoskeleton organization;antigen processing and presentation of exogenous peptide antigen via MHC class II;barbed-end actin filament capping;blood coagulation;cytoskeleton organization;ER to Golgi vesicle-mediated transport;movement of cell or subcellular component;negative regulation of filopodium assembly;regulation of cell morphogenesis;regulation of lamellipodium assembly	actin binding;actin filament binding;cadherin binding	actin cytoskeleton;actin filament;cytoskeleton;cytosol;extracellular exosome;F-actin capping protein complex;sarcomere;WASH complex	Endocytosis			17	1	1	64.3	4.7	4.7	31.35	0	30.818	113370000	4	0.938939	1	12.155	2.00773	sp|P47756|CAPZB_HUMAN;tr|B1AK85|B1AK85_HUMAN	sp|P47756|CAPZB_HUMAN;tr|B1AK85|B1AK85_HUMAN	1613	P47756	CAPZB_HUMAN	F-actin-capping protein subunit beta		CAPZB
19.9107	19.066	18.9664	19.8245	1	1										1	1	1	13.6	13.6	13.6	7.0879	0.0096416	2.2105	21968000	2	0.893528	1	12.0395	1.91652	tr|A0A0J9YXH7|A0A0J9YXH7_HUMAN;sp|Q99795|GPA33_HUMAN	tr|A0A0J9YXH7|A0A0J9YXH7_HUMAN;sp|Q99795|GPA33_HUMAN	4107	A0A0J9YXH7	A0A0J9YXH7_HUMAN			GPA33
19.6422	19.1724	19.598	20.6176	1	1										4	4	4	38.7	38.7	38.7	14.844	0	23.24	73213000	10	0.847131	1	11.9316	1.82415	tr|C9J6N5|C9J6N5_HUMAN;tr|C9JQ40|C9JQ40_HUMAN;tr|C9JW51|C9JW51_HUMAN;sp|Q9H098|F107B_HUMAN;tr|C9J3Q3|C9J3Q3_HUMAN;tr|X6RET8|X6RET8_HUMAN;tr|C9JP05|C9JP05_HUMAN;tr|F8WCJ2|F8WCJ2_HUMAN;tr|C9JYP1|C9JYP1_HUMAN;tr|C9J6Y8|C9J6Y8_HUMAN	tr|C9J6N5|C9J6N5_HUMAN;tr|C9JQ40|C9JQ40_HUMAN;tr|C9JW51|C9JW51_HUMAN;sp|Q9H098|F107B_HUMAN;tr|C9J3Q3|C9J3Q3_HUMAN;tr|X6RET8|X6RET8_HUMAN;tr|C9JP05|C9JP05_HUMAN	4381	C9J6N5	C9J6N5_HUMAN			FAM107B
21.2946	16.2804	19.8632	20.9818	1	1				cell redox homeostasis		cell				1	1	1	23.4	23.4	23.4	7.0271	0	8.1894	18335000	2	0.775424	1	11.4854	1.68273	tr|M0QXH0|M0QXH0_HUMAN;sp|Q99757|THIOM_HUMAN	tr|M0QXH0|M0QXH0_HUMAN;sp|Q99757|THIOM_HUMAN	4106	M0QXH0	M0QXH0_HUMAN			TXN2
18.7906	17.0233	16.4243	1	16.3595	1				NADP metabolic process;regulation of apoptotic process	NADPH binding;NADPH:quinone reductase activity;protein homodimerization activity;quinone binding	cytosol;extracellular exosome	p53 signaling pathway			3	3	3	12.3	12.3	12.3	35.536	0	6.3224	18323000	2	1.02577	1	11.2929	2.18479	sp|Q53FA7|QORX_HUMAN;tr|H7BZH6|H7BZH6_HUMAN	sp|Q53FA7|QORX_HUMAN	2774	Q53FA7	QORX_HUMAN	Quinone oxidoreductase PIG3		TP53I3
17.8701	15.0836	17.4189	1	15.0723	1				DNA damage checkpoint;regulation of apoptotic process		cytosol;nucleus				1	1	1	21.3	21.3	21.3	12.53	0.00041297	4.1455	5404600	1	1.09424	1	11.1001	2.32726	tr|B1AKZ5|B1AKZ5_HUMAN;sp|Q15121|PEA15_HUMAN	tr|B1AKZ5|B1AKZ5_HUMAN;sp|Q15121|PEA15_HUMAN	2562	B1AKZ5	B1AKZ5_HUMAN			PEA15
17.7305	15.77	17.3275	1	15.7095	1						integral component of membrane				2	2	2	20.8	20.8	20.8	14.164	0.0057185	2.3899	13253000	3	1.05003	1	11.0395	2.23496	tr|K7EQB1|K7EQB1_HUMAN;sp|Q9UNK0|STX8_HUMAN	tr|K7EQB1|K7EQB1_HUMAN;sp|Q9UNK0|STX8_HUMAN	5154	K7EQB1	K7EQB1_HUMAN			STX8
16.065	16.8248	17.5306	1	15.374	1						cytoplasm;cytosol;extracellular exosome;plasma membrane				3	3	3	9	9	9	63.964	0.00042726	4.8608	26227000	2	1.07652	1	11.0155	2.29013	sp|Q9BW04|SARG_HUMAN	sp|Q9BW04|SARG_HUMAN	4266	Q9BW04	SARG_HUMAN	Specifically androgen-regulated gene protein		SARG
18.0909	17.1052	17.2011	17.5049	1	1										2	2	2	11.1	11.1	11.1	28.306	0.00042918	4.988	31665000	4	0.929975	1	10.9641	1.98966	tr|E9PJF5|E9PJF5_HUMAN;sp|Q9HCU9|BRMS1_HUMAN;tr|H0YCF7|H0YCF7_HUMAN;tr|G5E9I4|G5E9I4_HUMAN;tr|E9PPD1|E9PPD1_HUMAN	tr|E9PJF5|E9PJF5_HUMAN;sp|Q9HCU9|BRMS1_HUMAN;tr|H0YCF7|H0YCF7_HUMAN;tr|G5E9I4|G5E9I4_HUMAN;tr|E9PPD1|E9PPD1_HUMAN	4604	E9PJF5	E9PJF5_HUMAN			BRMS1
17.0237	16.6824	16.9108	1	16.0349	1				electron transport chain;fatty acid beta-oxidation using acyl-CoA dehydrogenase;respiratory electron transport chain;response to oxidative stress	4 iron, 4 sulfur cluster binding;electron transfer activity;electron-transferring-flavoprotein dehydrogenase activity;flavin adenine dinucleotide binding;metal ion binding;oxidoreductase activity;oxidoreductase activity, oxidizing metal ions with flavin as acceptor;quinone binding;ubiquinone binding	integral component of mitochondrial inner membrane;mitochondrial electron transfer flavoprotein complex;mitochondrial matrix;mitochondrial membrane				4	4	4	7.3	7.3	7.3	68.495	0.00042753	4.8759	33239000	1	1.01696	1	10.8606	2.16665	sp|Q16134|ETFD_HUMAN;tr|D6RAD5|D6RAD5_HUMAN	sp|Q16134|ETFD_HUMAN	2656	Q16134	ETFD_HUMAN	Electron transfer flavoprotein-ubiquinone oxidoreductase, mitochondrial	TF-QO;TF-ubiquinone oxidoreductase	ETFDH
16.8507	17.4805	15.9386	1	15.9847	1				regulation of transcription, DNA-templated	metal ion binding	nucleoplasm;RSF complex				3	3	3	6	6	6	90.738	0	8.6143	21888000	9	1.00688	1	10.7617	2.14594	tr|H0YCN2|H0YCN2_HUMAN;sp|Q96T23|RSF1_HUMAN;tr|H0YER1|H0YER1_HUMAN	tr|H0YCN2|H0YCN2_HUMAN;sp|Q96T23|RSF1_HUMAN;tr|H0YER1|H0YER1_HUMAN	4049	H0YCN2	H0YCN2_HUMAN			RSF1
17.7711	16.46	16.2428	1	16.211	1				mRNA processing;pseudouridine synthesis	pseudouridine synthase activity;RNA binding	cytosol;mitochondrial matrix				3	3	3	10	10	10	36.694	0.00021487	5.0186	51697000	1	0.990144	1	10.7543	2.11169	sp|O95900|TRUB2_HUMAN	sp|O95900|TRUB2_HUMAN	805	O95900	TRUB2_HUMAN	Mitochondrial mRNA pseudouridine synthase TRUB2		TRUB2
16.3556	17.3855	16.3097	1	15.9419	1				aging;behavioral response to cocaine;cerebellum development;copulation;exploration behavior;gamma-aminobutyric acid biosynthetic process;gamma-aminobutyric acid catabolic process;locomotory behavior;negative regulation of blood pressure;negative regulation of dopamine secretion;negative regulation of gamma-aminobutyric acid secretion;negative regulation of platelet aggregation;neurotransmitter ca…	(S)-3-amino-2-methylpropionate transaminase activity;4-aminobutyrate transaminase activity;4-aminobutyrate:2-oxoglutarate transaminase activity;iron-sulfur cluster binding;metal ion binding;protein homodimerization activity;pyridoxal phosphate binding;succinate-semialdehyde dehydrogenase binding	4-aminobutyrate transaminase complex;extracellular exosome;mitochondrial matrix;mitochondrion;neuron projection	Alanine, aspartate and glutamate metabolism;beta-Alanine metabolism;Butanoate metabolism;GABAergic synapse;Metabolic pathways;Propanoate metabolism;Valine, leucine and isoleucine degradation			2	2	2	5	5	5	56.438	0	6.2818	22264000	4	1.00573	1	10.703	2.1436	sp|P80404|GABT_HUMAN;tr|H3BRN4|H3BRN4_HUMAN;tr|H3BNQ7|H3BNQ7_HUMAN	sp|P80404|GABT_HUMAN;tr|H3BRN4|H3BRN4_HUMAN;tr|H3BNQ7|H3BNQ7_HUMAN	2072	P80404	GABT_HUMAN	4-aminobutyrate aminotransferase, mitochondrial		ABAT
17.0002	13.3873	16.2596	1	12.6178	1				cellular protein modification process;mannose metabolic process;neutrophil degranulation;oligosaccharide catabolic process;protein deglycosylation	alpha-mannosidase activity;carbohydrate binding;metal ion binding	azurophil granule lumen;extracellular exosome;extracellular region;extracellular space;lysosomal lumen	Lysosome;Other glycan degradation			4	4	4	7	7	7	113.74	0	11.491	16628000	3	1.24503	1	10.6764	2.65169	sp|O00754|MA2B1_HUMAN;tr|M0QZG6|M0QZG6_HUMAN;tr|M0R2P5|M0R2P5_HUMAN;tr|M0QZ24|M0QZ24_HUMAN	sp|O00754|MA2B1_HUMAN	264	O00754	MA2B1_HUMAN	Lysosomal alpha-mannosidase	aman	MAN2B1
16.2877	16.5046	16.1169	1	15.2115	1				cell adhesion	structural molecule activity	extracellular matrix				1	1	1	2.5	2.5	2.5	70.733	0.0017398	3.1132	16237000	4	1.04754	1	10.5659	2.2298	tr|H7BXV5|H7BXV5_HUMAN;sp|P39060|COIA1_HUMAN	tr|H7BXV5|H7BXV5_HUMAN;sp|P39060|COIA1_HUMAN	1509	H7BXV5	H7BXV5_HUMAN			COL18A1
17.8671	16.0351	16.5309	16.9037	1	1					phosphatase binding					2	2	2	6.4	6.4	6.4	68.041	0	9.3714	33245000	8	0.921222	1	10.5098	1.97204	tr|A0A0G2JHC2|A0A0G2JHC2_HUMAN;sp|Q6NYC8|PPR18_HUMAN	tr|A0A0G2JHC2|A0A0G2JHC2_HUMAN;sp|Q6NYC8|PPR18_HUMAN	2990	A0A0G2JHC2	A0A0G2JHC2_HUMAN			PPP1R18
16.6966	14.1156	17.1166	1	14.4576	1				cellular response to hydrogen peroxide;cellular response to reactive nitrogen species;interleukin-4-mediated signaling pathway;mammary gland epithelial cell proliferation;mammary gland morphogenesis;negative regulation of transcription from RNA polymerase II promoter;negative regulation of type 2 immune response;positive regulation of isotype switching to IgE isotypes;positive regulation of trans…	DNA binding transcription factor activity;identical protein binding;protein phosphatase binding;RNA polymerase II core promoter sequence-specific DNA binding;RNA polymerase II regulatory region sequence-specific DNA binding;signal transducer activity;transcriptional activator activity, RNA polymerase II transcription regulatory region sequence-specific DNA binding	cytosol;membrane raft;nuclear chromatin;nuclear membrane;nucleoplasm	Hepatitis B;Inflammatory bowel disease (IBD);Jak-STAT signaling pathway;Necroptosis;Pathways in cancer;Th1 and Th2 cell differentiation;Th17 cell differentiation			3	3	3	4.5	4.5	4.5	94.134	0	5.6335	19540000	5	1.07599	1	10.4904	2.28901	sp|P42226|STAT6_HUMAN;tr|Q5FBW6|Q5FBW6_HUMAN;tr|G3V2L2|G3V2L2_HUMAN;tr|G3V2M3|G3V2M3_HUMAN;tr|G3V3E9|G3V3E9_HUMAN;tr|G3V2H4|G3V2H4_HUMAN;tr|G3V5I8|G3V5I8_HUMAN;tr|G3V568|G3V568_HUMAN;tr|G3V2X7|G3V2X7_HUMAN;tr|G3V370|G3V370_HUMAN;tr|H0YIY2|H0YIY2_HUMAN;tr|G3V5K5|G3V5K5_HUMAN;tr|H0YJH6|H0YJH6_HUMAN	sp|P42226|STAT6_HUMAN	1545	P42226	STAT6_HUMAN	Signal transducer and activator of transcription 6		STAT6
17.6958	16.1478	16.5197	17.1799	1	1				ectodermal cell differentiation;embryonic ectodermal digestive tract development;endocytic recycling;Golgi to vacuole transport;lysosomal transport;protein transport;retrograde transport, endosome to Golgi	Rab GTPase binding;syntaxin binding	cytosol;EARP complex;endosome membrane;GARP complex;Golgi apparatus;membrane;perinuclear region of cytoplasm;recycling endosome;trans-Golgi network membrane				3	3	3	6.2	6.2	6.2	82.22	0	10.733	30473000	4	0.895329	1	10.3945	1.92012	sp|Q8N1B4|VPS52_HUMAN	sp|Q8N1B4|VPS52_HUMAN	3374	Q8N1B4	VPS52_HUMAN	Vacuolar protein sorting-associated protein 52 homolog		VPS52
16.7009	13.3151	16.2096	1	13.2229	1				establishment of Sertoli cell barrier;histone H3-K9 trimethylation;histone H4-K20 trimethylation;positive regulation of transcription from RNA polymerase II promoter;regulation of gene expression by genetic imprinting;regulation of transcription from RNA polymerase II promoter;spermatogenesis;transcription, DNA-templated	histone deacetylase activity;transcription regulatory region DNA binding	cytoplasm;nucleoplasm;nucleus				3	3	3	3.4	3.4	3.4	147.81	0	6.3278	26766000	9	1.15462	1	10.3342	2.45528	sp|Q4LE39|ARI4B_HUMAN;tr|X6RCR8|X6RCR8_HUMAN;tr|H0Y7Y8|H0Y7Y8_HUMAN;tr|H7C5R6|H7C5R6_HUMAN	sp|Q4LE39|ARI4B_HUMAN	2761	Q4LE39	ARI4B_HUMAN	AT-rich interactive domain-containing protein 4B	RID domain-containing protein 4B	ARID4B
17.7355	13.2294	16.0729	1	14.1097	1				carbohydrate catabolic process;glycolipid catabolic process;glycoside catabolic process;glycosylceramide catabolic process;oligosaccharide metabolic process	alpha-galactosidase activity;alpha-N-acetylgalactosaminidase activity;protein homodimerization activity	cytoplasm;extracellular exosome;lysosome	Glycosphingolipid biosynthesis - globo and isoglobo series;Lysosome;Metabolic pathways			1	1	1	4.9	4.9	4.9	46.564	0.0030263	2.7595	7698700	2	1.06161	1	10.3094	2.25903	sp|P17050|NAGAB_HUMAN	sp|P17050|NAGAB_HUMAN	1146	P17050	NAGAB_HUMAN	Alpha-N-acetylgalactosaminidase		NAGA
16.2444	16.5124	16.7077	1	16.8345	1				mRNA 3'-end processing;mRNA 3'-end processing by stem-loop binding and cleavage;mRNA cleavage;mRNA export from nucleus;mRNA polyadenylation;mRNA splicing, via spliceosome;termination of RNA polymerase II transcription	RNA binding	membrane;mRNA cleavage and polyadenylation specificity factor complex;nucleoplasm	mRNA surveillance pathway			7	7	7	9.5	9.5	9.5	88.486	0	7.0621	68064000	5	0.902137	1	10.21	1.93375	sp|Q9P2I0|CPSF2_HUMAN;tr|H0YJF4|H0YJF4_HUMAN	sp|Q9P2I0|CPSF2_HUMAN	4934	Q9P2I0	CPSF2_HUMAN	Cleavage and polyadenylation specificity factor subunit 2		CPSF2
15.8141	15.1942	17.0716	1	1	16.9465				biotin metabolic process;biotin transport;pantothenate metabolic process;pantothenate transmembrane transport;transmembrane transport;transport	sodium-dependent multivitamin transmembrane transporter activity	brush border membrane;integral component of plasma membrane;membrane;plasma membrane;vesicle membrane	Vitamin digestion and absorption			2	2	2	3.8	3.8	3.8	68.641	0.00041399	4.181	10882000	3	0.843608	1	9.71115	1.81717	sp|Q9Y289|SC5A6_HUMAN	sp|Q9Y289|SC5A6_HUMAN	5212	Q9Y289	SC5A6_HUMAN	Sodium-dependent multivitamin transporter	a(+)-dependent multivitamin transporter	SLC5A6
17.5192	10.8516	14.4807	1	11.7206	1					zinc ion binding					3	3	3	4.7	4.7	4.7	141.79	0	29.747	27078000	3	1.12474	1	9.7103	2.39163	tr|A6NHN7|A6NHN7_HUMAN;sp|Q14202|ZMYM3_HUMAN;tr|A6NHB5|A6NHB5_HUMAN;tr|A6NC58|A6NC58_HUMAN;tr|A6NL54|A6NL54_HUMAN	tr|A6NHN7|A6NHN7_HUMAN;sp|Q14202|ZMYM3_HUMAN;tr|A6NHB5|A6NHB5_HUMAN;tr|A6NC58|A6NC58_HUMAN;tr|A6NL54|A6NL54_HUMAN	2455	A6NHN7	A6NHN7_HUMAN			ZMYM3
14.4635	15.2003	16.6011	1	15.397	1				mRNA export from nucleus;mRNA splicing, via spliceosome	RNA binding	nucleus;RES complex				11	11	11	22	22	22	70.52	0	31.108	198330000	35	0.929267	1	9.62262	1.98823	sp|Q9BRD0|BUD13_HUMAN;tr|H7C462|H7C462_HUMAN	sp|Q9BRD0|BUD13_HUMAN	4158	Q9BRD0	BUD13_HUMAN	BUD13 homolog		BUD13
15.7576	14.6039	15.2046	1	1	14.8956				axon development;axon guidance;cell adhesion;cell migration;cell-matrix adhesion;chemotaxis;leukocyte migration;nervous system development;neuron projection development;positive regulation of axon extension;synapse organization	protein domain specific binding	axon;axonal growth cone;cell surface;dendrite;extracellular matrix;focal adhesion;integral component of membrane;neuronal cell body;plasma membrane	Axon guidance;Cell adhesion molecules (CAMs)			4	4	4	4.3	4.3	4.3	140	0	7.8912	35617000	5	0.963757	1	9.55683	2.05796	sp|P32004|L1CAM_HUMAN;tr|H0Y5C3|H0Y5C3_HUMAN	sp|P32004|L1CAM_HUMAN	1419	P32004	L1CAM_HUMAN	Neural cell adhesion molecule L1	CAM-L1;-CAM-L1	L1CAM
16.2107	16.4658	15.774	18.0862	1	1										6	6	6	11.9	11.9	11.9	94.659	0	11.598	46044000	9	0.763336	1	9.45474	1.65902	sp|Q9Y2D5|AKAP2_HUMAN;tr|C9JVY5|C9JVY5_HUMAN	sp|Q9Y2D5|AKAP2_HUMAN;tr|C9JVY5|C9JVY5_HUMAN	5219	Q9Y2D5	AKAP2_HUMAN	A-kinase anchor protein 2	KAP-2	AKAP2
25.078	23.451	23.9232	23.1725	1	19.9162				antibacterial humoral response;antimicrobial humoral immune response mediated by antimicrobial peptide;defense response to Gram-positive bacterium;innate immune response in mucosa;nucleosome assembly	DNA binding;protein heterodimerization activity	cytosol;extracellular exosome;extracellular space;nucleoplasm;nucleosome;nucleus	Alcoholism;Systemic lupus erythematosus;Viral carcinogenesis			7	1	1	52.4	7.1	7.1	13.92	0.0021138	3.0199	2076200000	40	0.612345	1	9.4545	1.36444	sp|Q16778|H2B2E_HUMAN;sp|P33778|H2B1B_HUMAN;sp|P23527|H2B1O_HUMAN;sp|P06899|H2B1J_HUMAN;sp|Q8N257|H2B3B_HUMAN;sp|Q96A08|H2B1A_HUMAN;sp|Q6DRA6|H2B2D_HUMAN;sp|Q6DN03|H2B2C_HUMAN	sp|Q16778|H2B2E_HUMAN;sp|P33778|H2B1B_HUMAN;sp|P23527|H2B1O_HUMAN;sp|P06899|H2B1J_HUMAN;sp|Q8N257|H2B3B_HUMAN;sp|Q96A08|H2B1A_HUMAN	925	Q16778	H2B2E_HUMAN	Histone H2B type 2-E		HIST2H2BE
15.9035	13.9578	17.4176	1	1	17.5962										3	3	3	2.4	2.4	2.4	136.76	0.0019238	3.0372	43055000	3	0.754316	1	9.22757	1.64135	sp|Q6ZU35|K1211_HUMAN;tr|F5H1N7|F5H1N7_HUMAN	sp|Q6ZU35|K1211_HUMAN;tr|F5H1N7|F5H1N7_HUMAN	3088	Q6ZU35	K1211_HUMAN	Uncharacterized protein KIAA1211		KIAA1211
15.8973	14.5689	15.5174	1	1	16.4662						nucleus				3	3	3	3.3	3.3	3.3	160.74	0.0011974	3.5279	33899000	6	0.821786	1	9.17247	1.774	tr|F8VU51|F8VU51_HUMAN;tr|H0YIQ2|H0YIQ2_HUMAN;sp|P49750|YLPM1_HUMAN;tr|H0YI23|H0YI23_HUMAN	tr|F8VU51|F8VU51_HUMAN;tr|H0YIQ2|H0YIQ2_HUMAN;sp|P49750|YLPM1_HUMAN	5535	F8VU51	F8VU51_HUMAN			YLPM1
15.1472	13.9665	15.1392	16.536	1	1				cornification;epidermis development;keratinocyte differentiation;peptide cross-linking	cadherin binding;intermediate filament binding;protein binding, bridging;structural molecule activity	cornified envelope;cytosol;desmosome;extracellular exosome;intermediate filament cytoskeleton				6	6	6	5.1	5.1	5.1	231.6	0	22.004	43331000	11	0.75903	1	8.57229	1.65058	sp|Q92817|EVPL_HUMAN;tr|K7EKI0|K7EKI0_HUMAN	sp|Q92817|EVPL_HUMAN;tr|K7EKI0|K7EKI0_HUMAN	3719	Q92817	EVPL_HUMAN	Envoplakin		EVPL
22.6211	23.1123	1	1	19.2218	1				negative regulation of apoptotic process;oxidation-reduction process		integral component of membrane;mitochondrial inner membrane;respiratory chain				1	1	1	27.4	27.4	27.4	11.528	0	17.034	66770000	2	0.37591	1	8.50386	0.896183	sp|Q9BW72|HIG2A_HUMAN	sp|Q9BW72|HIG2A_HUMAN	4272	Q9BW72	HIG2A_HUMAN	HIG1 domain family member 2A, mitochondrial		HIGD2A
14.1822	15.6791	12.4482	1	15.1569	1				endonucleolytic cleavage in 5'-ETS of tricistronic rRNA transcript (SSU-rRNA, 5.8S rRNA, LSU-rRNA);endonucleolytic cleavage in ITS1 to separate SSU-rRNA from 5.8S rRNA and LSU-rRNA from tricistronic rRNA transcript (SSU-rRNA, 5.8S rRNA, LSU-rRNA);endonucleolytic cleavage to generate mature 5'-end of SSU-rRNA from (SSU-rRNA, 5.8S rRNA, LSU-rRNA);maturation of SSU-rRNA from tricistronic rRNA transc…	RNA binding	90S preribosome;cytoplasm;nucleolus;nucleoplasm;plasma membrane;preribosome, small subunit precursor;small-subunit processome				3	3	3	1.2	1.2	1.2	318.38	0.00041649	4.306	34069000	2	0.806035	1	8.38421	1.74293	sp|O75691|UTP20_HUMAN	sp|O75691|UTP20_HUMAN	624	O75691	UTP20_HUMAN	Small subunit processome component 20 homolog		UTP20
24.6383	23.8418	23.9842	1	23.1045	23.5732				aging;ATP biosynthetic process;cristae formation;mitochondrial ATP synthesis coupled proton transport;response to hyperoxia	hydrogen ion transmembrane transporter activity;transmembrane transporter activity	extracellular exosome;integral component of membrane;mitochondrial inner membrane;mitochondrial proton-transporting ATP synthase complex;proton-transporting ATP synthase complex, coupling factor F(o)	Alzheimer disease;Huntington disease;Metabolic pathways;Oxidative phosphorylation;Parkinson disease;Thermogenesis			1	1	1	4.4	4.4	4.4	24.817	0	20.436	303210000	14	0.481887	1	8.26219	1.10879	sp|P00846|ATP6_HUMAN	sp|P00846|ATP6_HUMAN	836	P00846	ATP6_HUMAN	ATP synthase subunit a		MT-ATP6
23.4176	23.0574	22.9701	21.1747	1	22.8495						integral component of membrane				2	2	2	48.2	48.2	48.2	8.8131	0	47.769	474480000	33	0.507459	1	8.14028	1.15925	tr|C9JAW5|C9JAW5_HUMAN;sp|Q9Y241|HIG1A_HUMAN;tr|C9JNU6|C9JNU6_HUMAN	tr|C9JAW5|C9JAW5_HUMAN;sp|Q9Y241|HIG1A_HUMAN;tr|C9JNU6|C9JNU6_HUMAN	5201	C9JAW5	C9JAW5_HUMAN
24.9615	24.4741	24.7098	1	24.5573	24.5894										1	1	1	14.1	14.1	14.1	7.0662	0.001005	3.6316	492570000	8	0.436169	1	7.99954	1.01788	sp|Q9Y2S6|TMA7_HUMAN	sp|Q9Y2S6|TMA7_HUMAN	5239	Q9Y2S6	TMA7_HUMAN	Translation machinery-associated protein 7		TMA7
19.7014	18.4774	20.1805	1	15.3147	18.2052				protein import into mitochondrial inner membrane;protein targeting to mitochondrion	mitochondrion targeting sequence binding;protein channel activity	integral component of membrane;mitochondrial inner membrane;mitochondrial inner membrane protein insertion complex				2	2	2	25.8	25.8	25.8	20.031	0	8.8175	18847000	3	0.67536	1	7.94646	1.48719	sp|Q9Y584|TIM22_HUMAN	sp|Q9Y584|TIM22_HUMAN	5346	Q9Y584	TIM22_HUMAN	Mitochondrial import inner membrane translocase subunit Tim22		TIMM22
20.9066	19.7069	1	1	15.9291	1				RNA processing		exosome (RNase complex);nucleolus				3	3	3	7.6	7.6	7.6	46.977	0	6.9731	84715000	6	0.412108	1	7.89481	0.969577	tr|D6RIY6|D6RIY6_HUMAN;sp|Q06265|EXOS9_HUMAN;tr|H0Y9L5|H0Y9L5_HUMAN;tr|D6R905|D6R905_HUMAN	tr|D6RIY6|D6RIY6_HUMAN;sp|Q06265|EXOS9_HUMAN	2204	D6RIY6	D6RIY6_HUMAN
20.9562	19.7245	20.6295	1	18.8534	17.8864						cytosol;mitochondrion;nucleus				5	5	5	25.1	25.1	25.1	28.466	0	18.883	97032000	8	0.606303	1	7.85682	1.35267	sp|Q9UFN0|NPS3A_HUMAN	sp|Q9UFN0|NPS3A_HUMAN	4996	Q9UFN0	NPS3A_HUMAN	Protein NipSnap homolog 3A	ipSnap3A	NIPSNAP3A
22.2669	17.5504	21.7007	21.2661	16.0246	1				blood coagulation;cellular protein metabolic process;chromatin organization;chromatin silencing at rDNA;interleukin-7-mediated signaling pathway;negative regulation of gene expression, epigenetic;nucleosome assembly;positive regulation of gene expression, epigenetic;regulation of gene silencing by miRNA;regulation of hematopoietic stem cell differentiation;regulation of megakaryocyte differentiat…	histone binding;nucleosomal DNA binding;protein heterodimerization activity	extracellular exosome;extracellular region;nucleoplasm;nucleosome;nucleus	Alcoholism;Systemic lupus erythematosus;Transcriptional misregulation in cancer			5	1	1	45.6	23.5	23.5	15.388	0	58.72	44944000	3	0.547719	1	7.74246	1.23827	sp|Q71DI3|H32_HUMAN;sp|Q16695|H31T_HUMAN;sp|P68431|H31_HUMAN;tr|K7EMV3|K7EMV3_HUMAN;tr|B4DEB1|B4DEB1_HUMAN;sp|Q6NXT2|H3C_HUMAN;tr|K7ES00|K7ES00_HUMAN;tr|K7EP01|K7EP01_HUMAN	sp|Q71DI3|H32_HUMAN;sp|Q16695|H31T_HUMAN;sp|P68431|H31_HUMAN;tr|K7EMV3|K7EMV3_HUMAN;tr|B4DEB1|B4DEB1_HUMAN;sp|Q6NXT2|H3C_HUMAN;tr|K7ES00|K7ES00_HUMAN	3102	Q71DI3	H32_HUMAN	Histone H3.2		HIST2H3A;HIST2H3C;HIST2H3D
22.3127	22.0117	21.1172	1	20.6584	20.5849				mitochondrial electron transport, NADH to ubiquinone;mitochondrial respiratory chain complex I assembly	NADH dehydrogenase (ubiquinone) activity	mitochondrial inner membrane;mitochondrial respiratory chain complex I	Alzheimer disease;Huntington disease;Metabolic pathways;Non-alcoholic fatty liver disease (NAFLD);Oxidative phosphorylation;Parkinson disease;Retrograde endocannabinoid signaling;Thermogenesis			4	4	4	43.1	43.1	43.1	13.459	0	13.028	103150000	9	0.518263	1	7.73277	1.1805	sp|Q16718|NDUA5_HUMAN;tr|F8WAS3|F8WAS3_HUMAN;tr|A0A087X1G1|A0A087X1G1_HUMAN;tr|H7BYD0|H7BYD0_HUMAN;tr|C9IZN5|C9IZN5_HUMAN;tr|A0A087WXR5|A0A087WXR5_HUMAN	sp|Q16718|NDUA5_HUMAN;tr|F8WAS3|F8WAS3_HUMAN;tr|A0A087X1G1|A0A087X1G1_HUMAN;tr|H7BYD0|H7BYD0_HUMAN;tr|C9IZN5|C9IZN5_HUMAN	2688	Q16718	NDUA5_HUMAN	NADH dehydrogenase [ubiquinone] 1 alpha subcomplex subunit 5		NDUFA5
19.1756	16.8665	18.3101	15.1394	15.2234	1				angiogenesis;inositol phosphate metabolic process;intracellular signal transduction;labyrinthine layer blood vessel development;lipid catabolic process;regulation of cell proliferation	metal ion binding;phosphatidylinositol phospholipase C activity;signal transducer activity	cleavage furrow;cytosol;plasma membrane	AGE-RAGE signaling pathway in diabetic complications;Calcium signaling pathway;Inositol phosphate metabolism;Metabolic pathways;Phosphatidylinositol signaling system;Thyroid hormone signaling pathway			18	18	18	32.4	32.4	32.4	89.257	0	122.62	576060000	71	0.735679	1	7.66317	1.60488	sp|Q8N3E9|PLCD3_HUMAN;tr|H0YGF8|H0YGF8_HUMAN;tr|F5GXC1|F5GXC1_HUMAN;tr|K7EQF2|K7EQF2_HUMAN	sp|Q8N3E9|PLCD3_HUMAN	3391	Q8N3E9	PLCD3_HUMAN	1-phosphatidylinositol 4,5-bisphosphate phosphodiesterase delta-3		PLCD3
20.092	20.7748	19.0518	19.0247	17.3311	1					growth factor activity					2	2	2	18.3	18.3	18.3	14.374	0	23.55	211630000	22	0.581235	1	7.52096	1.30378	tr|E9PPJ5|E9PPJ5_HUMAN;sp|P21741|MK_HUMAN;tr|E9PLM6|E9PLM6_HUMAN	tr|E9PPJ5|E9PPJ5_HUMAN;sp|P21741|MK_HUMAN;tr|E9PLM6|E9PLM6_HUMAN	1231	E9PPJ5	E9PPJ5_HUMAN			MDK
22.8414	22.7293	1	1	22.0344	1				carbohydrate metabolic process;GPI anchor biosynthetic process;protein C-linked glycosylation via 2'-alpha-mannosyl-L-tryptophan;protein mannosylation;protein N-linked glycosylation via asparagine;protein O-linked mannosylation;regulation of protein stability		dolichol-phosphate-mannose synthase complex;endoplasmic reticulum;endoplasmic reticulum membrane;integral component of endoplasmic reticulum membrane;mannosyltransferase complex;membrane	Metabolic pathways;N-Glycan biosynthesis			1	1	1	10.9	10.9	10.9	10.094	0.0013563	3.1545	58963000	4	0.302682	1	7.5121	0.744192	sp|Q9P2X0|DPM3_HUMAN	sp|Q9P2X0|DPM3_HUMAN	4944	Q9P2X0	DPM3_HUMAN	Dolichol-phosphate mannosyltransferase subunit 3		DPM3
20.4979	18.6815	18.3473	19.5458	14.5054	1				carbohydrate metabolic process;N-acetylglucosamine catabolic process;N-acetylneuraminate catabolic process;UDP-N-acetylglucosamine biosynthetic process	metal ion binding;N-acetylglucosamine-6-phosphate deacetylase activity	cytosol;nucleus	Amino sugar and nucleotide sugar metabolism;Metabolic pathways			4	4	4	16.6	16.6	16.6	43.747	0.0037559	2.6687	70821000	3	0.601563	1	7.49184	1.34343	sp|Q9Y303|NAGA_HUMAN;tr|H3BTE3|H3BTE3_HUMAN;tr|H3BQ15|H3BQ15_HUMAN;tr|H3BSD5|H3BSD5_HUMAN;tr|H3BTZ6|H3BTZ6_HUMAN;tr|H3BSV9|H3BSV9_HUMAN	sp|Q9Y303|NAGA_HUMAN;tr|H3BTE3|H3BTE3_HUMAN	5260	Q9Y303	NAGA_HUMAN	N-acetylglucosamine-6-phosphate deacetylase {ECO:0000305|PubMed:22692205}	lcNAc 6-P deacetylase {ECO:0000305}	AMDHD2
22.8362	21.2678	21.3669	1	21.1153	21.0932				mitochondrial translation;mitochondrial translational elongation;mitochondrial translational termination	structural constituent of ribosome	mitochondrial inner membrane;mitochondrial ribosome				3	3	3	38.2	38.2	38.2	12.266	0	5.7198	157800000	12	0.479565	1	7.42082	1.10419	sp|Q9BQC6|RT63_HUMAN	sp|Q9BQC6|RT63_HUMAN	4145	Q9BQC6	RT63_HUMAN	Ribosomal protein 63, mitochondrial	MRP63	MRPL57
24.0961	21.806	23.2246	23.0185	1	23.0486				aerobic respiration;mitochondrial respiratory chain complex IV assembly		integral component of membrane;mitochondrial membrane;mitochondrion	Thermogenesis			4	4	4	33.9	33.9	33.9	13.291	0	16.017	426750000	22	0.425783	1	7.35319	0.997071	sp|Q5RI15|COX20_HUMAN	sp|Q5RI15|COX20_HUMAN	2843	Q5RI15	COX20_HUMAN	Cytochrome c oxidase protein 20 homolog		COX20
19.8229	18.1633	18.0906	1	17.1561	15.9621				lipid storage;long-chain fatty acid transport;regulation of lipid metabolic process;response to drug;response to organic cyclic compound		cytosol;endoplasmic reticulum;extracellular region;lipid droplet;nucleus;plasma membrane	PPAR signaling pathway			5	5	5	15.6	15.6	15.6	48.075	0	12.875	62710000	6	0.630564	1	7.31955	1.39993	sp|Q99541|PLIN2_HUMAN;tr|Q5SYF5|Q5SYF5_HUMAN;tr|Q5SYF3|Q5SYF3_HUMAN;tr|Q5SYF4|Q5SYF4_HUMAN	sp|Q99541|PLIN2_HUMAN	4074	Q99541	PLIN2_HUMAN	Perilipin-2		PLIN2
22.9962	1	20.9256	1	1	21.0409										1	1	1	22	22	22	5.8668	0.00042105	4.555	48434000	3	0.306888	1	7.29363	0.753076	tr|F8VSA6|F8VSA6_HUMAN;tr|E9PS38|E9PS38_HUMAN;sp|Q15843|NEDD8_HUMAN;tr|S4R3E9|S4R3E9_HUMAN;tr|E9PL57|E9PL57_HUMAN	tr|F8VSA6|F8VSA6_HUMAN;tr|E9PS38|E9PS38_HUMAN;sp|Q15843|NEDD8_HUMAN;tr|S4R3E9|S4R3E9_HUMAN;tr|E9PL57|E9PL57_HUMAN	2651	F8VSA6	F8VSA6_HUMAN			NEDD8
20.9024	20.6943	1	1	18.8724	1										1	1	1	31.6	31.6	31.6	6.7215	0	22.623	32769000	3	0.336224	1	7.24145	0.814481	tr|A0A087WU03|A0A087WU03_HUMAN	tr|A0A087WU03|A0A087WU03_HUMAN	5432	A0A087WU03	A0A087WU03_HUMAN			HNRNPDL
22.5995	20.4087	21.8148	1	20.3754	21.7882				autophagosome assembly;autophagy;cargo loading into COPII-coated vesicle;cell migration;COPII vesicle coating;defense response to bacterium;endocytosis;ER to Golgi vesicle-mediated transport;Golgi organization;growth hormone secretion;interleukin-8 secretion;melanosome transport;positive regulation of glycoprotein metabolic process;positive regulation of ubiquitin protein ligase activity;post-tra…	cadherin binding;GTP binding;GTPase activity	cytosol;early endosome;endoplasmic reticulum membrane;extracellular exosome;Golgi apparatus;Golgi membrane;melanosome;transport vesicle membrane	Legionellosis			12	5	5	66.3	28.8	28.8	22.677	0	87.804	440720000	36	0.463168	1	7.21982	1.07168	sp|P62820|RAB1A_HUMAN;tr|E7END7|E7END7_HUMAN	sp|P62820|RAB1A_HUMAN;tr|E7END7|E7END7_HUMAN	1992	P62820	RAB1A_HUMAN	Ras-related protein Rab-1A		RAB1A
21.7021	21.6716	1	1	20.8526	1				ER to Golgi vesicle-mediated transport;regulation of fibroblast apoptotic process		COPII-coated ER to Golgi transport vesicle;endoplasmic reticulum;endoplasmic reticulum membrane;Golgi apparatus;integral component of Golgi membrane;membrane				2	2	2	34.1	34.1	34.1	8.9687	0	17.171	63179000	9	0.305715	1	7.17369	0.7506	sp|Q9Y5U9|IR3IP_HUMAN	sp|Q9Y5U9|IR3IP_HUMAN	5370	Q9Y5U9	IR3IP_HUMAN	Immediate early response 3-interacting protein 1		IER3IP1
19.0733	18.9658	16.7407	16.8542	15.4114	1					RNA binding					6	6	6	17.4	17.4	17.4	44.638	0	11.477	43410000	14	0.631196	1	7.17145	1.40117	tr|K7EQ03|K7EQ03_HUMAN;tr|K7EP90|K7EP90_HUMAN;sp|Q9BTD8|RBM42_HUMAN;tr|K7EML2|K7EML2_HUMAN;tr|K7ER08|K7ER08_HUMAN	tr|K7EQ03|K7EQ03_HUMAN;tr|K7EP90|K7EP90_HUMAN;sp|Q9BTD8|RBM42_HUMAN	4204	K7EQ03	K7EQ03_HUMAN			RBM42
18.0892	16.1634	17.5185	13.9035	15.3868	1				cellular protein modification process;endocytosis;peptidyl-serine phosphorylation;regulation of cell shape;signal transduction;Wnt signaling pathway	ATP binding;protein kinase activity;protein serine/threonine kinase activity	cytoplasm;nucleus	Hedgehog signaling pathway			6	6	3	14.1	14.1	9.4	51.388	0	10.17	80488000	17	0.710246	1	7.16025	1.5552	sp|Q9Y6M4|KC1G3_HUMAN;tr|H0YBN6|H0YBN6_HUMAN;tr|K7ESB6|K7ESB6_HUMAN;tr|K7EP38|K7EP38_HUMAN;tr|A0A087WW97|A0A087WW97_HUMAN;tr|A0A087WZK4|A0A087WZK4_HUMAN;tr|A0A087WXD7|A0A087WXD7_HUMAN;tr|A0A087WWF5|A0A087WWF5_HUMAN	sp|Q9Y6M4|KC1G3_HUMAN;tr|H0YBN6|H0YBN6_HUMAN	5416	Q9Y6M4	KC1G3_HUMAN	Casein kinase I isoform gamma-3	KI-gamma 3	CSNK1G3
20.4915	18.7748	19.5088	1	17.4477	18.8786				catabolic process;lipid catabolic process;low-density lipoprotein particle clearance;xenobiotic metabolic process	serine hydrolase activity;sterol esterase activity	endoplasmic reticulum membrane;integral component of membrane;membrane	Bile secretion;Cholesterol metabolism;Cortisol synthesis and secretion;Cushing syndrome			6	6	6	22.1	22.1	22.1	45.807	0	12.705	102300000	12	0.549524	1	7.14962	1.2418	sp|Q6PIU2|NCEH1_HUMAN;tr|A0A0A0MTJ9|A0A0A0MTJ9_HUMAN;tr|H7C046|H7C046_HUMAN	sp|Q6PIU2|NCEH1_HUMAN;tr|A0A0A0MTJ9|A0A0A0MTJ9_HUMAN;tr|H7C046|H7C046_HUMAN	3032	Q6PIU2	NCEH1_HUMAN	Neutral cholesterol ester hydrolase 1	CEH	NCEH1
21.0157	22.2049	21.5269	1	21.2917	21.0398				protein transport		integral component of membrane				2	2	2	13.5	13.5	13.5	25.728	0	13.631	122050000	7	0.457566	1	7.13869	1.06055	sp|Q969E2|SCAM4_HUMAN;tr|K7EJJ4|K7EJJ4_HUMAN;tr|C9JWM2|C9JWM2_HUMAN	sp|Q969E2|SCAM4_HUMAN;tr|K7EJJ4|K7EJJ4_HUMAN;tr|C9JWM2|C9JWM2_HUMAN	3756	Q969E2	SCAM4_HUMAN	Secretory carrier-associated membrane protein 4	ecretory carrier membrane protein 4	SCAMP4
21.154	15.7181	17.8113	1	15.5325	16.792				response to oxidative stress	glutathione peroxidase activity	cytosol				4	4	4	27.7	27.7	27.7	21.938	0	10.158	56743000	7	0.60039	1	7.11964	1.34114	tr|A0A087WUQ6|A0A087WUQ6_HUMAN;sp|P07203|GPX1_HUMAN	tr|A0A087WUQ6|A0A087WUQ6_HUMAN;sp|P07203|GPX1_HUMAN	929	A0A087WUQ6	A0A087WUQ6_HUMAN	Glutathione peroxidase {ECO:0000256|RuleBase:RU000499}		GPX1
20.5534	20.103	1	1	18.333	1				caveola assembly		caveola;Golgi membrane;integral component of membrane				1	1	1	15.9	15.9	15.9	12.953	0.0087687	2.248	27993000	3	0.339484	1	7.10781	0.821248	tr|E9PCT3|E9PCT3_HUMAN;sp|P51636|CAV2_HUMAN	tr|E9PCT3|E9PCT3_HUMAN;sp|P51636|CAV2_HUMAN	1746	E9PCT3	E9PCT3_HUMAN	Caveolin {ECO:0000256|RuleBase:RU000680}		CAV2
21.4477	21.0419	20.1648	1	20.7774	19.6734				cell adhesion;extracellular matrix organization;integrin-mediated signaling pathway;leukocyte migration;neutrophil degranulation;opsonization;positive regulation of cell proliferation;positive regulation of cell-cell adhesion;positive regulation of inflammatory response;positive regulation of phagocytosis;positive regulation of T cell activation;response to bacterium	thrombospondin receptor activity	extracellular exosome;integral component of plasma membrane;plasma membrane;specific granule membrane;tertiary granule membrane	ECM-receptor interaction			4	4	4	11.8	11.8	11.8	35.213	0	9.599	205770000	8	0.477258	1	7.0679	1.09963	sp|Q08722|CD47_HUMAN;tr|H7BYS8|H7BYS8_HUMAN	sp|Q08722|CD47_HUMAN	2236	Q08722	CD47_HUMAN	Leukocyte surface antigen CD47		CD47
21.7134	1	21.1103	1	1	20.6622						endoplasmic reticulum membrane;integral component of membrane				1	1	1	19	19	19	18.038	0	24.89	36809000	3	0.303788	1	7.05383	0.746531	tr|I3L1T3|I3L1T3_HUMAN;sp|Q9GZP9|DERL2_HUMAN	tr|I3L1T3|I3L1T3_HUMAN;sp|Q9GZP9|DERL2_HUMAN	4363	I3L1T3	I3L1T3_HUMAN	Derlin {ECO:0000256|RuleBase:RU363059}		DERL2
19.7878	18.9245	19.1175	1	17.7728	17.9062						Golgi apparatus;integral component of membrane				6	6	6	17.8	17.8	17.8	48.864	0	12.593	83276000	6	0.556081	1	7.05028	1.25463	sp|Q6P4E1|CASC4_HUMAN;tr|H0YMR0|H0YMR0_HUMAN;tr|H0YM51|H0YM51_HUMAN	sp|Q6P4E1|CASC4_HUMAN;tr|H0YMR0|H0YMR0_HUMAN	3013	Q6P4E1	CASC4_HUMAN	Protein CASC4		CASC4
21.6179	19.785	20.897	20.6066	19.5542	1										1	1	1	32.7	32.7	32.7	5.7044	0	13.569	39733000	6	0.478849	1	7.04637	1.10278	tr|C9JL85|C9JL85_HUMAN;sp|P58546|MTPN_HUMAN	tr|C9JL85|C9JL85_HUMAN;sp|P58546|MTPN_HUMAN	1885	C9JL85	C9JL85_HUMAN			MTPN
21.3357	18.9693	19.4192	1	18.3991	19.2081				aging;ATP-dependent chromatin remodeling;brain development;embryonic organ development;heart development;histone acetylation;in utero embryonic development;methylation-dependent chromatin silencing;negative regulation of transcription from RNA polymerase II promoter;regulation of DNA methylation;regulation of signal transduction by p53 class mediator;response to estradiol;response to nutrient lev…	chromatin binding;DNA binding;histone deacetylase activity;methyl-CpG binding	cytoplasm;heterochromatin;nuclear chromatin;nucleoplasm;NuRD complex;protein complex				7	7	7	23.4	23.4	23.4	32.844	0	44.461	407320000	25	0.516203	1	7.03901	1.17645	sp|O95983|MBD3_HUMAN;tr|K7EIE8|K7EIE8_HUMAN;tr|A0A087WT34|A0A087WT34_HUMAN;tr|A0A087X1H1|A0A087X1H1_HUMAN;tr|A0A0A0MTS6|A0A0A0MTS6_HUMAN	sp|O95983|MBD3_HUMAN;tr|K7EIE8|K7EIE8_HUMAN	808	O95983	MBD3_HUMAN	Methyl-CpG-binding domain protein 3		MBD3
20.5904	18.633	19.708	1	17.2803	19.5436						integral component of membrane				1	1	1	17.7	17.7	17.7	16.805	0	7.3908	27519000	4	0.527694	1	7.03584	1.19902	tr|H0Y870|H0Y870_HUMAN;tr|H0Y861|H0Y861_HUMAN;tr|Q8TDQ4|Q8TDQ4_HUMAN;tr|Q5SSC2|Q5SSC2_HUMAN;sp|Q9H0R3|TM222_HUMAN	tr|H0Y870|H0Y870_HUMAN;tr|H0Y861|H0Y861_HUMAN;tr|Q8TDQ4|Q8TDQ4_HUMAN;tr|Q5SSC2|Q5SSC2_HUMAN;sp|Q9H0R3|TM222_HUMAN	4395	H0Y870	H0Y870_HUMAN			TMEM222
21.6309	18.9615	1	1	18.5231	1						cytosol;nucleus;plasma membrane				1	1	1	14.2	14.2	14.2	10.897	0	11.368	36103000	1	0.331744	1	7.0231	0.805164	sp|Q9GZP8|IMUP_HUMAN	sp|Q9GZP8|IMUP_HUMAN	4362	Q9GZP8	IMUP_HUMAN	Immortalization up-regulated protein		IMUP
20.1777	20.0419	19.4574	1	18.8406	18.8179										2	2	2	9.3	9.3	9.3	26.189	0.00021701	5.2606	58253000	5	0.517027	1	7.00619	1.17807	tr|F6UTR7|F6UTR7_HUMAN;sp|Q9NVA1|UQCC1_HUMAN;tr|B1AKV4|B1AKV4_HUMAN;tr|B1AKV6|B1AKV6_HUMAN;tr|B1AKV3|B1AKV3_HUMAN	tr|F6UTR7|F6UTR7_HUMAN;sp|Q9NVA1|UQCC1_HUMAN;tr|B1AKV4|B1AKV4_HUMAN;tr|B1AKV6|B1AKV6_HUMAN;tr|B1AKV3|B1AKV3_HUMAN	4753	F6UTR7	F6UTR7_HUMAN			UQCC1
20.7349	19.5325	1	1	18.2643	1						BRCA1-A complex;BRISC complex;cytosol				3	3	3	14.8	14.8	14.8	31.972	0	13.576	66609000	3	0.336147	1	7.00104	0.814321	tr|F8W733|F8W733_HUMAN;sp|Q9NXR7|BRE_HUMAN;tr|C9J2G0|C9J2G0_HUMAN;tr|A0A075B7D2|A0A075B7D2_HUMAN	tr|F8W733|F8W733_HUMAN;sp|Q9NXR7|BRE_HUMAN;tr|C9J2G0|C9J2G0_HUMAN	4832	F8W733	F8W733_HUMAN			BABAM2
21.4151	20.2949	20.388	20.0334	1	20.0816				glutathione biosynthetic process;glutathione derivative biosynthetic process;leukotriene biosynthetic process;lipid metabolic process;membrane lipid catabolic process;positive regulation of inflammatory response;response to lipopolysaccharide;response to organonitrogen compound;xenobiotic metabolic process	enzyme activator activity;glutathione peroxidase activity;glutathione transferase activity;leukotriene-C4 synthase activity	endoplasmic reticulum;endoplasmic reticulum membrane;integral component of membrane;intracellular membrane-bounded organelle;membrane;nuclear envelope;organelle membrane;plasma membrane	Chemical carcinogenesis;Drug metabolism - cytochrome P450;Drug metabolism - other enzymes;Fluid shear stress and atherosclerosis;Glutathione metabolism;Hepatocellular carcinoma;Metabolic pathways;Metabolism of xenobiotics by cytochrome P450;Pathways in cancer;Platinum drug resistance			1	1	1	9.5	9.5	9.5	16.62	0.0019246	3.0388	68254000	15	0.477084	1	6.99433	1.09928	sp|Q99735|MGST2_HUMAN	sp|Q99735|MGST2_HUMAN	4103	Q99735	MGST2_HUMAN	Microsomal glutathione S-transferase 2	icrosomal GST-2	MGST2
19.414	21.142	19.1695	18.5206	1	19.2772										1	1	1	16.2	16.2	16.2	9.116	0.0011744	3.2632	27741000	5	0.50894	1	6.97587	1.16216	tr|K7ELP6|K7ELP6_HUMAN;sp|Q53F19|NCBP3_HUMAN	tr|K7ELP6|K7ELP6_HUMAN;sp|Q53F19|NCBP3_HUMAN	2773	K7ELP6	K7ELP6_HUMAN			NCBP3
21.4357	19.4182	20.24	19.6479	19.5437	1				mRNA processing;regulation of alternative mRNA splicing, via spliceosome;RNA splicing	RNA binding	nuclear speck;nucleoplasm;spliceosomal complex				5	5	5	16.5	16.5	16.5	59.38	0	29.304	125050000	21	0.48707	1	6.96744	1.11903	sp|Q8WXA9|SREK1_HUMAN	sp|Q8WXA9|SREK1_HUMAN	3642	Q8WXA9	SREK1_HUMAN	Splicing regulatory glutamine/lysine-rich protein 1		SREK1
1	20.0603	21.1037	19.3662	1	1						endoplasmic reticulum membrane;integral component of membrane				1	1	1	4.1	4.1	4.1	21.862	0.0057259	2.3978	59990000	3	0.316944	1	6.93257	0.774232	tr|A8MT72|A8MT72_HUMAN;tr|Q2NKQ5|Q2NKQ5_HUMAN;sp|Q16799|RTN1_HUMAN	tr|A8MT72|A8MT72_HUMAN;tr|Q2NKQ5|Q2NKQ5_HUMAN;sp|Q16799|RTN1_HUMAN	2697	A8MT72	A8MT72_HUMAN	Reticulon {ECO:0000256|RuleBase:RU210713}		RTN1
19.1963	1	17.297	1	14.7036	1				apoptotic process;central nervous system development;mRNA 3'-end processing;mRNA export from nucleus;negative regulation of apoptotic process;RNA export from nucleus;RNA splicing;termination of RNA polymerase II transcription;viral mRNA export from host cell nucleus	RNA binding	nuclear body;nuclear speck;nucleoplasm;nucleus;THO complex;THO complex part of transcription export complex;transcription export complex	RNA transport			6	6	6	23.2	23.2	23.2	37.535	0	23.547	137080000	16	0.398036	1	6.92987	0.941158	sp|Q86W42|THOC6_HUMAN	sp|Q86W42|THOC6_HUMAN	3237	Q86W42	THOC6_HUMAN	THO complex subunit 6 homolog		THOC6
21.8891	1	21.4188	1	1	21.6317										4	4	4	33.9	33.9	33.9	19.291	0	17.363	162120000	5	0.285739	1	6.89209	0.708183	sp|Q9GZN8|CT027_HUMAN;tr|H7BYU9|H7BYU9_HUMAN	sp|Q9GZN8|CT027_HUMAN;tr|H7BYU9|H7BYU9_HUMAN	4360	Q9GZN8	CT027_HUMAN	UPF0687 protein C20orf27		C20orf27
20.0198	18.8111	20.1977	1	19.0134	18.4196				regulation of cell proliferation	hydrolase activity	cytoplasm;extracellular exosome;nucleoplasm				2	2	2	13.4	13.4	13.4	21	0	28.89	52532000	4	0.507273	1	6.86523	1.15888	sp|O75884|RBBP9_HUMAN;tr|A0A087WYQ5|A0A087WYQ5_HUMAN	sp|O75884|RBBP9_HUMAN;tr|A0A087WYQ5|A0A087WYQ5_HUMAN	645	O75884	RBBP9_HUMAN	Putative hydrolase RBBP9		RBBP9
22.1079	21.2966	20.1888	21.3071	20.7481	1				mitochondrial translational elongation;mitochondrial translational termination;translation	structural constituent of ribosome	mitochondrial inner membrane;mitochondrial large ribosomal subunit				2	2	2	41.5	41.5	41.5	13.664	0	28.6	62250000	9	0.438056	1	6.84602	1.02165	sp|Q86TS9|RM52_HUMAN;tr|G3V3U6|G3V3U6_HUMAN;tr|G5E9P5|G5E9P5_HUMAN	sp|Q86TS9|RM52_HUMAN;tr|G3V3U6|G3V3U6_HUMAN;tr|G5E9P5|G5E9P5_HUMAN	3209	Q86TS9	RM52_HUMAN	39S ribosomal protein L52, mitochondrial	52mt;RP-L52	MRPL52
22.3288	20.7725	21.5991	22.002	1	21.1628				cellular response to gamma radiation;intrinsic apoptotic signaling pathway in response to DNA damage by p53 class mediator;negative regulation of cell death;regulation of ion transmembrane transport	voltage-gated ion channel activity	extracellular exosome;integral component of membrane;nuclear outer membrane;sarcoplasmic reticulum membrane				1	1	1	4.9	4.9	4.9	26.21	0	14.048	231320000	7	0.424738	1	6.8452	0.994974	sp|Q9BVC6|TM109_HUMAN	sp|Q9BVC6|TM109_HUMAN	4248	Q9BVC6	TM109_HUMAN	Transmembrane protein 109		TMEM109
21.3446	20.9552	20.9332	1	21.0986	20.6137						nuclear body;nuclear membrane;nucleolus;nucleus				2	2	2	46.6	46.6	46.6	6.6846	0.000424	4.6853	47426000	3	0.443755	1	6.84027	1.03303	tr|B8ZZJ0|B8ZZJ0_HUMAN;tr|B9A032|B9A032_HUMAN;sp|P63165|SUMO1_HUMAN;tr|B8ZZN6|B8ZZN6_HUMAN	tr|B8ZZJ0|B8ZZJ0_HUMAN;tr|B9A032|B9A032_HUMAN;sp|P63165|SUMO1_HUMAN;tr|B8ZZN6|B8ZZN6_HUMAN	2024	B8ZZJ0	B8ZZJ0_HUMAN			SUMO1
20.2043	16.2398	17.7197	1	15.6456	17.017				cellular amino acid metabolic process;response to toxic substance;xenobiotic metabolic process	alpha-amino-acid esterase activity;hydrolase activity	extracellular exosome;mitochondrial outer membrane;mitochondrion				2	2	2	9.6	9.6	9.6	32.542	0	14.002	35802000	4	0.579562	1	6.83371	1.30051	sp|Q86WA6|BPHL_HUMAN;tr|Q49AI2|Q49AI2_HUMAN;tr|B4DML3|B4DML3_HUMAN	sp|Q86WA6|BPHL_HUMAN;tr|Q49AI2|Q49AI2_HUMAN;tr|B4DML3|B4DML3_HUMAN	3241	Q86WA6	BPHL_HUMAN	Valacyclovir hydrolase	ACVase;alacyclovirase	BPHL
19.4716	18.1091	18.7893	1	16.9104	18.0073				animal organ regeneration;hyperosmotic salinity response;mitochondrial electron transport, ubiquinol to cytochrome c;proton transport;response to cadmium ion;response to calcium ion;response to cobalamin;response to copper ion;response to drug;response to ethanol;response to glucagon;response to heat;response to hyperoxia;response to hypoxia;response to mercury ion;response to toxic substance	metal ion binding;protein complex binding;ubiquinol-cytochrome-c reductase activity	integral component of mitochondrial inner membrane;mitochondrial inner membrane;mitochondrial respiratory chain complex III;mitochondrion	Alzheimer disease;Cardiac muscle contraction;Huntington disease;Metabolic pathways;Non-alcoholic fatty liver disease (NAFLD);Oxidative phosphorylation;Parkinson disease;Thermogenesis			1	1	1	2.4	2.4	2.4	42.717	0.0071639	2.3202	11743000	3	0.547276	1	6.81743	1.2374	sp|P00156|CYB_HUMAN	sp|P00156|CYB_HUMAN	818	P00156	CYB_HUMAN	Cytochrome b		MT-CYB
20.1368	23.0692	21.5704	1	22.2236	21.1067										2	2	2	25	25	25	13.389	0	6.5713	95660000	5	0.417759	1	6.81537	0.980952	tr|K7EM09|K7EM09_HUMAN;tr|K7EPR0|K7EPR0_HUMAN;tr|K7ELQ9|K7ELQ9_HUMAN;sp|Q6UW68|TM205_HUMAN	tr|K7EM09|K7EM09_HUMAN;tr|K7EPR0|K7EPR0_HUMAN;tr|K7ELQ9|K7ELQ9_HUMAN;sp|Q6UW68|TM205_HUMAN	3056	K7EM09	K7EM09_HUMAN			TMEM205
21.094	22.687	22.6587	1	22.3573	22.6984				chemotaxis;cytokine-mediated signaling pathway;ion transport	chemokine binding;ion transmembrane transporter activity	endoplasmic reticulum;endoplasmic reticulum membrane;extracellular exosome;integral component of membrane;membrane;plasma membrane				2	2	2	18.4	18.4	18.4	16.691	0	8.141	168090000	5	0.399559	1	6.79467	0.944242	sp|Q04941|PLP2_HUMAN	sp|Q04941|PLP2_HUMAN	2191	Q04941	PLP2_HUMAN	Proteolipid protein 2		PLP2
19.6001	19.241	18.4176	18.3119	1	17.5699				Golgi ribbon formation;protein transport		cis-Golgi network;endoplasmic reticulum exit site;endoplasmic reticulum membrane;endoplasmic reticulum-Golgi intermediate compartment;endoplasmic reticulum-Golgi intermediate compartment membrane;Golgi apparatus;integral component of membrane				2	2	2	9.6	9.6	9.6	26.005	0	5.8525	31202000	2	0.528016	1	6.79228	1.19965	sp|Q9Y3A6|TMED5_HUMAN;tr|M0R072|M0R072_HUMAN;tr|B1AKT3|B1AKT3_HUMAN	sp|Q9Y3A6|TMED5_HUMAN;tr|M0R072|M0R072_HUMAN;tr|B1AKT3|B1AKT3_HUMAN	5280	Q9Y3A6	TMED5_HUMAN	Transmembrane emp24 domain-containing protein 5		TMED5
22.0965	20.932	19.2375	21.4784	19.4706	1				vacuolar transport		intracellular				2	2	2	18.6	18.6	18.6	12.939	0	7.2238	74247000	7	0.442641	1	6.77237	1.03081	tr|I3L3E4|I3L3E4_HUMAN;sp|Q96FZ7|CHMP6_HUMAN;tr|I3L4G8|I3L4G8_HUMAN;tr|I3L4A1|I3L4A1_HUMAN	tr|I3L3E4|I3L3E4_HUMAN;sp|Q96FZ7|CHMP6_HUMAN;tr|I3L4G8|I3L4G8_HUMAN;tr|I3L4A1|I3L4A1_HUMAN	3883	I3L3E4	I3L3E4_HUMAN			CHMP6
20.8139	18.7145	19.101	1	18.7965	18.5729										3	3	3	19.4	19.4	19.4	26.928	0	7.207	53249000	5	0.497064	1	6.75337	1.13876	sp|Q7Z309|F122B_HUMAN;tr|G1UD79|G1UD79_HUMAN	sp|Q7Z309|F122B_HUMAN;tr|G1UD79|G1UD79_HUMAN	3149	Q7Z309	F122B_HUMAN	Protein FAM122B		FAM122B
19.1303	17.559	17.5304	1	16.3599	16.6748										1	1	1	2.9	2.9	2.9	30.955	0.0087719	2.2523	27443000	2	0.576157	1	6.72833	1.29387	tr|A0A0M3HER4|A0A0M3HER4_HUMAN;sp|Q8TD08|MK15_HUMAN	tr|A0A0M3HER4|A0A0M3HER4_HUMAN;sp|Q8TD08|MK15_HUMAN	3556	A0A0M3HER4
21.6797	1	18.9024	1	1	19.3986				vesicle-mediated transport		integral component of membrane				2	2	2	20.3	20.3	20.3	8.2139	0	9.1154	23196000	4	0.307355	1	6.72783	0.754062	tr|G3V1U5|G3V1U5_HUMAN;tr|F5H6U7|F5H6U7_HUMAN;sp|Q9Y3E0|GOT1B_HUMAN	tr|G3V1U5|G3V1U5_HUMAN;tr|F5H6U7|F5H6U7_HUMAN;sp|Q9Y3E0|GOT1B_HUMAN	5295	G3V1U5	G3V1U5_HUMAN
18.5324	17.7275	18.9547	16.9516	17.0903	1					RNA binding					3	3	3	13.5	13.5	13.5	27.354	0.00041195	4.1139	31026000	2	0.55691	1	6.72422	1.25626	sp|Q9H3H3|CK068_HUMAN	sp|Q9H3H3|CK068_HUMAN	4444	Q9H3H3	CK068_HUMAN	UPF0696 protein C11orf68		C11orf68
18.8867	16.66	17.2276	1	15.7277	15.8901				acylglycerol acyl-chain remodeling;cellular protein metabolic process;lipid homeostasis;lipid particle organization;lipid storage;negative regulation of sequestering of triglyceride;positive regulation of triglyceride catabolic process;post-translational protein modification;triglyceride catabolic process	acylglycerol O-acyltransferase activity;lipoprotein lipase activity;triglyceride lipase activity	cytoplasm;cytosol;endoplasmic reticulum lumen;endoplasmic reticulum membrane;integral component of membrane;lipid droplet;membrane;nucleoplasm;plasma membrane	Glycerolipid metabolism;Metabolic pathways;Regulation of lipolysis in adipocytes;Thermogenesis			3	3	3	11.1	11.1	11.1	55.315	0	9.2739	21669000	5	0.604291	1	6.71881	1.34875	sp|Q96AD5|PLPL2_HUMAN	sp|Q96AD5|PLPL2_HUMAN	3788	Q96AD5	PLPL2_HUMAN	Patatin-like phospholipase domain-containing protein 2		PNPLA2
19.274	20.7652	19.8416	1	19.7429	19.0055				regulated exocytosis;synaptic vesicle membrane organization		cell junction;extracellular exosome;integral component of membrane;lipid droplet;neuromuscular junction;synaptic vesicle membrane				3	3	3	12.5	12.5	12.5	24.81	0	11.834	46212000	7	0.473553	1	6.71081	1.09229	sp|O43760|SNG2_HUMAN;tr|K7ELD9|K7ELD9_HUMAN;tr|K7ENG9|K7ENG9_HUMAN;tr|K7ELS8|K7ELS8_HUMAN	sp|O43760|SNG2_HUMAN;tr|K7ELD9|K7ELD9_HUMAN;tr|K7ENG9|K7ENG9_HUMAN;tr|K7ELS8|K7ELS8_HUMAN	451	O43760	SNG2_HUMAN	Synaptogyrin-2 {ECO:0000305}		SYNGR2
20.1895	20.8077	19.3547	19.1127	20.1337	1				sphingomyelin catabolic process	sphingomyelin phosphodiesterase activity	extracellular space				4	4	4	15	15	15	45.314	0	11.162	107990000	9	0.4653	1	6.70186	1.07592	tr|F8VWW8|F8VWW8_HUMAN;sp|Q92485|ASM3B_HUMAN;tr|Q5T0Y8|Q5T0Y8_HUMAN	tr|F8VWW8|F8VWW8_HUMAN;sp|Q92485|ASM3B_HUMAN;tr|Q5T0Y8|Q5T0Y8_HUMAN	3663	F8VWW8	F8VWW8_HUMAN			SMPDL3B
21.8936	1	20.5273	21.329	1	1				protein folding	chaperone binding;unfolded protein binding	cytoplasm;cytosol;mitochondrion;nucleus;prefoldin complex				2	2	2	20.1	20.1	20.1	15.314	0.00021561	5.0703	33832000	3	0.282054	1	6.69727	0.700301	sp|Q9NQP4|PFD4_HUMAN;tr|E9PQY2|E9PQY2_HUMAN	sp|Q9NQP4|PFD4_HUMAN;tr|E9PQY2|E9PQY2_HUMAN	4657	Q9NQP4	PFD4_HUMAN	Prefoldin subunit 4		PFDN4
21.4963	19.4609	21.0521	1	19.8662	21.067				carbohydrate metabolic process;generation of precursor metabolites and energy;glucosamine catabolic process;N-acetylglucosamine metabolic process;single fertilization	glucosamine-6-phosphate deaminase activity	cytoplasm;cytosol;extracellular exosome	Amino sugar and nucleotide sugar metabolism;Metabolic pathways			10	10	6	57.4	57.4	36.7	32.668	0	64.587	370520000	33	0.43984	1	6.69201	1.02521	sp|P46926|GNPI1_HUMAN;tr|D6R9P4|D6R9P4_HUMAN;tr|D6RAY7|D6RAY7_HUMAN;tr|D6RFF8|D6RFF8_HUMAN;tr|D6RB13|D6RB13_HUMAN;tr|D6R917|D6R917_HUMAN;tr|V9GYK3|V9GYK3_HUMAN;tr|D6RFK5|D6RFK5_HUMAN;tr|V9GYW0|V9GYW0_HUMAN	sp|P46926|GNPI1_HUMAN;tr|D6R9P4|D6R9P4_HUMAN;tr|D6RAY7|D6RAY7_HUMAN;tr|D6RFF8|D6RFF8_HUMAN;tr|D6RB13|D6RB13_HUMAN;tr|D6R917|D6R917_HUMAN	1604	P46926	GNPI1_HUMAN	Glucosamine-6-phosphate isomerase 1		GNPDA1
20.6153	19.0624	20.3827	20.7421	18.2475	1						actin cytoskeleton;cytosol				10	3	3	31	14.7	14.7	28.524	0	13.283	152280000	7	0.464647	1	6.69023	1.07462	tr|F5H7S3|F5H7S3_HUMAN;tr|H7BYY1|H7BYY1_HUMAN;tr|H0YK48|H0YK48_HUMAN;tr|B7Z596|B7Z596_HUMAN;tr|H0YN06|H0YN06_HUMAN	tr|F5H7S3|F5H7S3_HUMAN;tr|H7BYY1|H7BYY1_HUMAN;tr|H0YK48|H0YK48_HUMAN;tr|B7Z596|B7Z596_HUMAN	5483	F5H7S3	F5H7S3_HUMAN			TPM1
18.4908	18.607	19.1147	1	16.2925	18.8688					metal ion binding					6	3	3	25.1	14.1	14.1	28.14	0	16.002	56930000	9	0.527073	1	6.68372	1.1978	tr|O95205|O95205_HUMAN;sp|Q5VZF2|MBNL2_HUMAN;tr|C9J4T8|C9J4T8_HUMAN;tr|B1AKI6|B1AKI6_HUMAN;sp|Q9NUK0|MBNL3_HUMAN	tr|O95205|O95205_HUMAN;sp|Q5VZF2|MBNL2_HUMAN	2910	O95205	O95205_HUMAN			MBLL
19.867	21.0253	21.0643	1	20.8493	20.0621				cell division;cell separation after cytokinesis;ESCRT III complex disassembly;establishment of protein localization;mitotic metaphase plate congression;multivesicular body assembly;nucleus organization;protein transport;regulation of centrosome duplication;regulation of mitotic spindle assembly;vacuolar transport;viral budding via host ESCRT complex	identical protein binding;protein domain specific binding	cytosol;endosome membrane;ESCRT III complex;extracellular exosome;late endosome membrane;membrane coat;midbody;nucleus	Endocytosis;Necroptosis			2	2	2	8.5	8.5	8.5	22.109	0	5.3644	83053000	5	0.441129	1	6.68175	1.02779	sp|Q7LBR1|CHM1B_HUMAN	sp|Q7LBR1|CHM1B_HUMAN	3136	Q7LBR1	CHM1B_HUMAN	Charged multivesicular body protein 1b		CHMP1B
20.9917	21.3031	1	1	21.2643	1					ATP binding					2	1	1	26.6	10.1	10.1	12.421	0.0057291	2.4083	48475000	3	0.28235	1	6.67682	0.700935	tr|A0A087WW00|A0A087WW00_HUMAN;tr|C9J9H9|C9J9H9_HUMAN;sp|Q9Y2X8|UB2D4_HUMAN;sp|P51668|UB2D1_HUMAN	tr|A0A087WW00|A0A087WW00_HUMAN;tr|C9J9H9|C9J9H9_HUMAN;sp|Q9Y2X8|UB2D4_HUMAN;sp|P51668|UB2D1_HUMAN	1751	A0A087WW00	A0A087WW00_HUMAN			UBE2D1
18.2229	17.069	20.1318	17.1754	17.223	1										1	1	1	5.9	5.9	5.9	31.371	0	13.37	24912000	2	0.538195	1	6.67509	1.21962	tr|B4DMI0|B4DMI0_HUMAN;tr|E9PBM2|E9PBM2_HUMAN;sp|Q8WUF8|F172A_HUMAN	tr|B4DMI0|B4DMI0_HUMAN;tr|E9PBM2|E9PBM2_HUMAN;sp|Q8WUF8|F172A_HUMAN	3601	B4DMI0	B4DMI0_HUMAN			FAM172A
20.5374	20.121	1	19.7329	1	1				mRNA 5'-splice site recognition;mRNA splicing, via spliceosome;spliceosomal snRNP assembly	pre-mRNA 5'-splice site binding;protein homodimerization activity;RNA binding;single-stranded RNA binding;zinc ion binding	Cajal body;commitment complex;nucleoplasm;prespliceosome;U1 snRNP	Spliceosome			2	2	2	18.9	18.9	18.9	17.394	0.00042079	4.5327	70196000	3	0.300788	1	6.64185	0.740185	sp|P09234|RU1C_HUMAN;tr|A0A0A0MRR7|A0A0A0MRR7_HUMAN	sp|P09234|RU1C_HUMAN;tr|A0A0A0MRR7|A0A0A0MRR7_HUMAN	985	P09234	RU1C_HUMAN	U1 small nuclear ribonucleoprotein C {ECO:0000255|HAMAP-Rule:MF_03153}	1 snRNP C {ECO:0000255|HAMAP-Rule:MF_03153};1C {ECO:0000255|HAMAP-Rule:MF_03153};1-C {ECO:0000255|HAMAP-Rule:MF_03153}	SNRPC
20.8318	18.3931	20.3986	20.6361	18.0845	1						cytoplasm				1	1	1	29.5	29.5	29.5	5.1538	0.0028458	2.8188	15322000	1	0.46149	1	6.63432	1.06835	tr|D6RAX1|D6RAX1_HUMAN;tr|D6RCT8|D6RCT8_HUMAN;tr|A6NFV8|A6NFV8_HUMAN;sp|Q96EV8|DTBP1_HUMAN	tr|D6RAX1|D6RAX1_HUMAN;tr|D6RCT8|D6RCT8_HUMAN;tr|A6NFV8|A6NFV8_HUMAN;sp|Q96EV8|DTBP1_HUMAN	3866	D6RAX1	D6RAX1_HUMAN			DTNBP1
19.2249	17.853	18.4008	1	16.5629	18.0323										1	1	1	19.5	19.5	19.5	9.5175	0	7.7458	13742000	4	0.53486	1	6.62783	1.21308	tr|J3KRR0|J3KRR0_HUMAN;tr|J3QQM5|J3QQM5_HUMAN;sp|Q9BT23|LIMD2_HUMAN	tr|J3KRR0|J3KRR0_HUMAN;tr|J3QQM5|J3QQM5_HUMAN;sp|Q9BT23|LIMD2_HUMAN	4195	J3KRR0	J3KRR0_HUMAN
19.3254	15.8554	1	1	14.3584	1				cell redox homeostasis;intrinsic apoptotic signaling pathway in response to endoplasmic reticulum stress;negative regulation of protein phosphorylation;positive regulation of ATPase activity;protein folding in endoplasmic reticulum;response to endoplasmic reticulum stress;ubiquitin-dependent ERAD pathway	ATPase activator activity;ATPase binding;chaperone binding;disulfide oxidoreductase activity;Hsp70 protein binding;misfolded protein binding;oxidoreductase activity, acting on a sulfur group of donors, disulfide as acceptor;protein disulfide oxidoreductase activity	endoplasmic reticulum;endoplasmic reticulum chaperone complex;endoplasmic reticulum lumen;membrane	Protein processing in endoplasmic reticulum			3	3	3	4.5	4.5	4.5	91.079	0.0010117	3.7319	30738000	2	0.388342	1	6.60743	0.921499	sp|Q8IXB1|DJC10_HUMAN;tr|E7EP04|E7EP04_HUMAN	sp|Q8IXB1|DJC10_HUMAN	3317	Q8IXB1	DJC10_HUMAN	DnaJ homolog subfamily C member 10		DNAJC10
19.8548	15.4589	1	1	14.5224	1				mRNA processing;RNA splicing;transcription from RNA polymerase II promoter	protein domain specific binding;RNA binding	nucleus				6	6	6	6.5	6.5	6.5	139.27	0	14.551	111990000	11	0.381842	1	6.59708	0.908278	sp|Q9H7N4|SFR19_HUMAN	sp|Q9H7N4|SFR19_HUMAN	4509	Q9H7N4	SFR19_HUMAN	Splicing factor, arginine/serine-rich 19		SCAF1
18.7196	17.5985	18.3959	1	17.1239	16.8183				androgen receptor signaling pathway;atrial cardiac muscle cell development;heart trabecula formation;negative regulation of apoptotic process;negative regulation of transcription from RNA polymerase II promoter;osteoblast differentiation;positive regulation of transcription, DNA-templated;regulation of lipid metabolic process;response to hormone;transcription, DNA-templated;ventricular cardiac mu…	androgen receptor binding;identical protein binding;metal ion binding;transcription coactivator activity;transcription factor binding	focal adhesion;M band;nucleoplasm;nucleus;Z disc	Osteoclast differentiation			4	4	4	17.9	17.9	17.9	32.193	0	14.91	40290000	4	0.546246	1	6.5906	1.23539	sp|Q14192|FHL2_HUMAN;tr|J3KNW4|J3KNW4_HUMAN;tr|A0A0A0MSG2|A0A0A0MSG2_HUMAN	sp|Q14192|FHL2_HUMAN;tr|J3KNW4|J3KNW4_HUMAN;tr|A0A0A0MSG2|A0A0A0MSG2_HUMAN	2452	Q14192	FHL2_HUMAN	Four and a half LIM domains protein 2	HL-2	FHL2
22.5531	19.9105	19.788	22.3034	19.1815	1				intracellular protein transport	SNAP receptor activity	intracellular;membrane				2	2	2	42.3	42.3	42.3	10.509	0	32.97	49662000	7	0.418753	1	6.58892	0.982951	tr|K7EQ84|K7EQ84_HUMAN;tr|K7EPP9|K7EPP9_HUMAN;tr|K7ELY2|K7ELY2_HUMAN;tr|K7EIY4|K7EIY4_HUMAN;tr|Q5U8S2|Q5U8S2_HUMAN;sp|O60499|STX10_HUMAN;tr|K7EJ05|K7EJ05_HUMAN;tr|X6R2W0|X6R2W0_HUMAN	tr|K7EQ84|K7EQ84_HUMAN;tr|K7EPP9|K7EPP9_HUMAN;tr|K7ELY2|K7ELY2_HUMAN;tr|K7EIY4|K7EIY4_HUMAN;tr|Q5U8S2|Q5U8S2_HUMAN;sp|O60499|STX10_HUMAN;tr|K7EJ05|K7EJ05_HUMAN;tr|X6R2W0|X6R2W0_HUMAN	498	K7EQ84	K7EQ84_HUMAN			STX10
20.3668	19.1725	19.7514	1	17.9738	20.5919				transcription, DNA-templated	DNA binding;DNA-directed 5'-3' RNA polymerase activity;protein dimerization activity	nucleus				4	4	4	39.1	39.1	39.1	15.237	0	9.023	56365000	4	0.461817	1	6.57502	1.069	sp|Q9Y2S0|RPAC2_HUMAN;tr|Q7Z776|Q7Z776_HUMAN;tr|A0A087X0U2|A0A087X0U2_HUMAN	sp|Q9Y2S0|RPAC2_HUMAN	5237	Q9Y2S0	RPAC2_HUMAN	DNA-directed RNA polymerases I and III subunit RPAC2	NA polymerases I and III subunit AC2	POLR1D
20.3822	17.8287	1	1	17.5148	1				bone mineralization;inositol phosphate metabolic process;ossification;polyphosphate metabolic process	acid phosphatase activity;bisphosphoglycerate 3-phosphatase activity;inositol hexakisphosphate 2-phosphatase activity;inositol phosphate phosphatase activity;inositol-1,3,4,5,6-pentakisphosphate 3-phosphatase activity;inositol-1,3,4,5-tetrakisphosphate 3-phosphatase activity;protein histidine phosphatase activity	endoplasmic reticulum;endoplasmic reticulum lumen;extracellular exosome	Glycolysis / Gluconeogenesis;Inositol phosphate metabolism;Metabolic pathways			4	4	4	12.9	12.9	12.9	55.051	0	22.579	69038000	8	0.32949	1	6.56535	0.800469	sp|Q9UNW1|MINP1_HUMAN	sp|Q9UNW1|MINP1_HUMAN	5163	Q9UNW1	MINP1_HUMAN	Multiple inositol polyphosphate phosphatase 1 {ECO:0000312|HGNC:HGNC:7102}		MINPP1
19.005	18.1585	16.5776	1	16.5829	16.4913					5'-3' exonuclease activity;endonuclease activity;metal ion binding;nucleic acid binding	mitochondrial inner membrane;protein complex				4	4	4	16.6	16.6	16.6	41.084	0	13.181	95892000	15	0.555762	1	6.55563	1.25401	sp|Q9Y2C4|EXOG_HUMAN;tr|F8WE28|F8WE28_HUMAN;tr|F8WE38|F8WE38_HUMAN;tr|H7C0W6|H7C0W6_HUMAN	sp|Q9Y2C4|EXOG_HUMAN	5217	Q9Y2C4	EXOG_HUMAN	Nuclease EXOG, mitochondrial		EXOG
18.3204	16.0202	18.3405	1	15.8093	16.2048				chitin catabolic process;oligosaccharide catabolic process	chitin binding;chitinase activity	extracellular exosome;extracellular space;lysosome				2	2	2	6	6	6	43.759	0.00021626	5.1294	18663000	3	0.576696	1	6.55562	1.29492	sp|Q01459|DIAC_HUMAN	sp|Q01459|DIAC_HUMAN	2137	Q01459	DIAC_HUMAN	Di-N-acetylchitobiase		CTBS
20.2899	16.2857	18.6566	1	16.2893	18.2799						integral component of membrane;microtubule cytoskeleton;plasma membrane				4	4	4	24.4	24.4	24.4	29.34	0	15.628	45330000	8	0.515167	1	6.55431	1.17441	sp|Q8IUW5|RELL1_HUMAN;tr|D6RBN9|D6RBN9_HUMAN	sp|Q8IUW5|RELL1_HUMAN;tr|D6RBN9|D6RBN9_HUMAN	3283	Q8IUW5	RELL1_HUMAN	RELT-like protein 1		RELL1
19.2463	14.302	18.1907	1	13.6362	17.4422				aging;cerebellum development;in utero embryonic development;mitochondrial electron transport, NADH to ubiquinone;mitochondrial respiratory chain complex I assembly;response to ethanol;response to hypoxia;response to nicotine	NADH dehydrogenase (ubiquinone) activity	integral component of membrane;mitochondrial inner membrane;mitochondrial respiratory chain complex I	Metabolic pathways;Oxidative phosphorylation;Parkinson disease;Retrograde endocannabinoid signaling;Thermogenesis			3	3	3	8.3	8.3	8.3	51.58	0	6.0144	17339000	5	0.559997	1	6.55357	1.26229	sp|P03905|NU4M_HUMAN	sp|P03905|NU4M_HUMAN	858	P03905	NU4M_HUMAN	NADH-ubiquinone oxidoreductase chain 4		MT-ND4
12.8854	11.5941	13.4293	16.2668	1	1				axonogenesis;cellular response to magnesium ion;cytoskeletal anchoring at plasma membrane;ER to Golgi vesicle-mediated transport;establishment of protein localization;Golgi to plasma membrane protein transport;magnesium ion homeostasis;maintenance of protein location in plasma membrane;membrane assembly;mitotic cytokinesis;negative regulation of delayed rectifier potassium channel activity;neurom…	cadherin binding;cytoskeletal protein binding;ion channel binding;protein binding, bridging;spectrin binding;structural constituent of cytoskeleton	axon initial segment;basolateral plasma membrane;cell surface;costamere;cytosol;dendrite;endoplasmic reticulum;Golgi apparatus;intercalated disc;lateral plasma membrane;lysosome;neuromuscular junction;neuron projection;node of Ranvier;plasma membrane;postsynaptic membrane;sarcolemma;sarcoplasmic reticulum;spectrin-associated cytoskeleton;T-tubule;Z disc	Proteoglycans in cancer			6	6	5	1.9	1.9	1.7	480.4	0	12.215	51220000	6	0.56869	1	6.54731	1.27928	sp|Q12955|ANK3_HUMAN;tr|A0A087WTF3|A0A087WTF3_HUMAN;tr|A0A087WUY3|A0A087WUY3_HUMAN;tr|A0A087WZ65|A0A087WZ65_HUMAN;tr|A0A087WWI5|A0A087WWI5_HUMAN;tr|H0YA66|H0YA66_HUMAN;tr|H0YAH5|H0YAH5_HUMAN;tr|A0A087WTE8|A0A087WTE8_HUMAN;tr|D6RHY3|D6RHY3_HUMAN;tr|A0A087WVC2|A0A087WVC2_HUMAN;tr|A0A087X0B4|A0A087X0B4_HUMAN;tr|H0Y3A4|H0Y3A4_HUMAN	sp|Q12955|ANK3_HUMAN;tr|A0A087WTF3|A0A087WTF3_HUMAN;tr|A0A087WUY3|A0A087WUY3_HUMAN;tr|A0A087WZ65|A0A087WZ65_HUMAN	2285	Q12955	ANK3_HUMAN	Ankyrin-3 {ECO:0000303|PubMed:7836469}	NK-3 {ECO:0000303|PubMed:7836469}	ANK3
18.4636	17.6556	1	1	15.5303	1				regulation of transcription, DNA-templated;vesicle-mediated transport	DNA binding;zinc ion binding	Golgi apparatus;integral component of membrane;nucleus				3	3	3	11.3	11.3	11.3	34.114	0.0084141	2.27	35893000	3	0.364936	1	6.52962	0.873732	sp|O95159|ZFPL1_HUMAN;tr|E9PQA5|E9PQA5_HUMAN;tr|E9PQ47|E9PQ47_HUMAN;tr|E9PNY1|E9PNY1_HUMAN;tr|H0YCU8|H0YCU8_HUMAN;tr|E9PMQ3|E9PMQ3_HUMAN	sp|O95159|ZFPL1_HUMAN;tr|E9PQA5|E9PQA5_HUMAN;tr|E9PQ47|E9PQ47_HUMAN;tr|E9PNY1|E9PNY1_HUMAN	715	O95159	ZFPL1_HUMAN	Zinc finger protein-like 1		ZFPL1
20.2571	21.5156	20.7216	1	21.2024	20.7225				translation	structural constituent of ribosome	ribosome				3	3	3	38.7	38.7	38.7	10.474	0	9.3209	129890000	12	0.416592	1	6.52312	0.978607	tr|D6RAN8|D6RAN8_HUMAN;sp|Q9P0M9|RM27_HUMAN;tr|H7C5U8|H7C5U8_HUMAN	tr|D6RAN8|D6RAN8_HUMAN;sp|Q9P0M9|RM27_HUMAN;tr|H7C5U8|H7C5U8_HUMAN	4910	D6RAN8	D6RAN8_HUMAN
19.6558	17.3142	1	1	16.4342	1				protein folding	peptidyl-prolyl cis-trans isomerase activity					4	4	4	22	22	22	27.409	0	10.604	33361000	1	0.345879	1	6.51197	0.834493	tr|C9JN15|C9JN15_HUMAN;tr|C9JM79|C9JM79_HUMAN;sp|Q13427|PPIG_HUMAN;tr|E9PG73|E9PG73_HUMAN	tr|C9JN15|C9JN15_HUMAN;tr|C9JM79|C9JM79_HUMAN;sp|Q13427|PPIG_HUMAN;tr|E9PG73|E9PG73_HUMAN	2353	C9JN15	C9JN15_HUMAN	Peptidyl-prolyl cis-trans isomerase {ECO:0000256|RuleBase:RU363019}	PIase {ECO:0000256|RuleBase:RU363019}	PPIG
20.217	1	19.5655	1	1	19.2738					actin filament binding;calcium ion binding					1	1	1	10.3	10.3	10.3	11.341	0.00042735	4.868	30389000	2	0.301682	1	6.50292	0.742077	tr|Q5JUP3|Q5JUP3_HUMAN;sp|Q9BQI0|AIF1L_HUMAN	tr|Q5JUP3|Q5JUP3_HUMAN;sp|Q9BQI0|AIF1L_HUMAN	4151	Q5JUP3	Q5JUP3_HUMAN			AIF1L
18.4045	18.9966	20.0551	1	18.1971	18.7848				glycosaminoglycan catabolic process;heparan sulfate proteoglycan catabolic process	metal ion binding;N-sulfoglucosamine sulfohydrolase activity;sulfuric ester hydrolase activity	extracellular exosome;lysosomal lumen;lysosome	Glycosaminoglycan degradation;Lysosome;Metabolic pathways			3	3	3	7.8	7.8	7.8	56.695	0	19.933	76403000	5	0.482058	1	6.49142	1.10913	sp|P51688|SPHM_HUMAN;tr|I3NI22|I3NI22_HUMAN	sp|P51688|SPHM_HUMAN	1753	P51688	SPHM_HUMAN	N-sulphoglucosamine sulphohydrolase		SGSH
19.8793	19.2769	20.0564	1	19.1081	19.637				cellular response to DNA damage stimulus;peptidyl-serine ADP-ribosylation;regulation of protein ADP-ribosylation	histone binding	nucleus				8	8	8	27.2	27.2	27.2	39.436	0	13.9	103430000	8	0.456529	1	6.48919	1.05849	sp|Q9NWY4|CD027_HUMAN;sp|A8MVJ9|YI028_HUMAN	sp|Q9NWY4|CD027_HUMAN	4802	Q9NWY4	HPF1_HUMAN	Histone PARylation factor 1 {ECO:0000303|PubMed:27067600, ECO:0000312|HGNC:HGNC:26051}		HPF1
18.9259	18.6858	18.6382	1	17.2703	18.5989					oxidoreductase activity	integral component of membrane				2	2	2	13.3	13.3	13.3	22.62	0.00021654	5.1814	26645000	2	0.498538	1	6.46024	1.14167	tr|K7ERC8|K7ERC8_HUMAN;sp|Q06136|KDSR_HUMAN	tr|K7ERC8|K7ERC8_HUMAN;sp|Q06136|KDSR_HUMAN	2201	K7ERC8	K7ERC8_HUMAN			KDSR
19.3744	17.4198	1	1	16.4332	1					RNA binding					4	1	1	12.4	3.7	3.7	43.647	0.006984	2.3258	16994000	2	0.343862	1	6.45366	0.830319	tr|A0A0D9SEM4|A0A0D9SEM4_HUMAN;sp|Q08170|SRSF4_HUMAN	tr|A0A0D9SEM4|A0A0D9SEM4_HUMAN;sp|Q08170|SRSF4_HUMAN	2222	A0A0D9SEM4	A0A0D9SEM4_HUMAN			SRSF4
18.6921	17.3344	18.0954	17.9243	1	15.864				glutamate metabolic process	D-glutamate cyclase activity	mitochondrial matrix	D-Glutamine and D-glutamate metabolism;Metabolic pathways			5	5	5	12.5	12.5	12.5	66.436	0	15.615	59356000	8	0.531013	1	6.44452	1.20553	sp|Q7Z3D6|CN159_HUMAN;tr|H0YB62|H0YB62_HUMAN;tr|H0YB09|H0YB09_HUMAN;tr|H0YB11|H0YB11_HUMAN;tr|A0A0C4DGD4|A0A0C4DGD4_HUMAN	sp|Q7Z3D6|CN159_HUMAN;tr|H0YB62|H0YB62_HUMAN;tr|H0YB09|H0YB09_HUMAN	3153	Q7Z3D6	GLUCM_HUMAN	D-glutamate cyclase, mitochondrial {ECO:0000305}		DGLUCY
20.2585	14.593	18.719	1	15.1339	18.1358				antigen processing and presentation of exogenous peptide antigen via MHC class I, TAP-dependent;antigen processing and presentation of exogenous peptide antigen via MHC class I, TAP-independent;antigen processing and presentation of peptide antigen via MHC class I;immune response;interferon-gamma-mediated signaling pathway;regulation of immune response;type I interferon signaling pathway;viral pr…	peptide antigen binding	cell surface;early endosome membrane;endoplasmic reticulum;ER to Golgi transport vesicle membrane;extracellular exosome;Golgi apparatus;Golgi membrane;integral component of lumenal side of endoplasmic reticulum membrane;integral component of plasma membrane;MHC class I protein complex;phagocytic vesicle membrane;plasma membrane;recycling endosome membrane				13	4	0	44.3	18.9	0	40.885	0	17.98	63209000	8	0.507729	1	6.43362	1.15978	sp|P30508|1C12_HUMAN;sp|Q29960|1C16_HUMAN;sp|P30510|1C14_HUMAN;sp|P04222|1C03_HUMAN;sp|P30501|1C02_HUMAN;tr|A0A0G2JKJ1|A0A0G2JKJ1_HUMAN	sp|P30508|1C12_HUMAN;sp|Q29960|1C16_HUMAN;sp|P30510|1C14_HUMAN;sp|P04222|1C03_HUMAN;sp|P30501|1C02_HUMAN	1385	P30508	1C12_HUMAN	HLA class I histocompatibility antigen, Cw-12 alpha chain		HLA-C
21.0034	1	19.0506	1	1	19.7888						cytosol;nucleus				1	1	1	23.3	23.3	23.3	11.852	0.0010042	3.6211	10653000	1	0.290819	1	6.42173	0.719017	tr|A0A087WTY9|A0A087WTY9_HUMAN;sp|Q9Y605|MOFA1_HUMAN	tr|A0A087WTY9|A0A087WTY9_HUMAN;sp|Q9Y605|MOFA1_HUMAN	5379	A0A087WTY9	A0A087WTY9_HUMAN			MRFAP1
17.174	18.507	1	1	15.4215	1				DNA-templated transcription, initiation;intracellular estrogen receptor signaling pathway;negative regulation of histone acetylation;negative regulation of protein kinase activity;negative regulation of transcription from RNA polymerase II promoter;negative regulation of transcription, DNA-templated;positive regulation of transcription from RNA polymerase II promoter;regulation of signal transduc…	histone acetyltransferase binding;protein heterodimerization activity;thyroid hormone receptor binding;transcription coactivator activity;transcription factor binding;transcription regulatory region DNA binding;vitamin D receptor binding	Golgi apparatus;MLL1 complex;nucleoplasm;transcription factor complex;transcription factor TFIID complex;transcription factor TFTC complex	Basal transcription factors			4	4	4	14	14	14	40.259	0	9.3579	69528000	11	0.361887	1	6.41982	0.867477	sp|Q15545|TAF7_HUMAN	sp|Q15545|TAF7_HUMAN	2612	Q15545	TAF7_HUMAN	Transcription initiation factor TFIID subunit 7		TAF7
20.0899	16.9351	16.3158	1	17.1512	15.9356				asparagine catabolic process via L-aspartate;L-phenylalanine catabolic process	asparaginase activity;beta-aspartyl-peptidase activity	cytoplasm;cytosol;nucleus	Alanine, aspartate and glutamate metabolism;Metabolic pathways			3	3	3	18.2	18.2	18.2	32.054	0	18.688	34830000	5	0.531125	1	6.41804	1.20575	sp|Q7L266|ASGL1_HUMAN	sp|Q7L266|ASGL1_HUMAN	3117	Q7L266	ASGL1_HUMAN	Isoaspartyl peptidase/L-asparaginase		ASRGL1
19.5783	17.4078	17.4822	17.3768	16.8413	1				epithelial cell differentiation;fructosamine metabolic process;fructoselysine metabolic process;post-translational protein modification	fructosamine-3-kinase activity;kinase activity	cytosol				2	2	2	9.4	9.4	9.4	35.171	0.00041451	4.2017	29902000	2	0.520125	1	6.41672	1.18416	sp|Q9H479|FN3K_HUMAN	sp|Q9H479|FN3K_HUMAN	4458	Q9H479	FN3K_HUMAN	Fructosamine-3-kinase		FN3K
18.6141	18.5507	19.1716	18.2651	17.8216	1				cell death;cellular response to tumor necrosis factor;cellular response to virus;inner ear receptor cell differentiation;necrotic cell death;negative regulation of cell proliferation;positive regulation of intrinsic apoptotic signaling pathway;positive regulation of MAPK cascade;pyroptosis;sensory perception of sound	cardiolipin binding;phosphatidylinositol-4,5-bisphosphate binding	cytosol;membrane;plasma membrane				7	7	7	18.1	18.1	18.1	54.554	0	25.179	100970000	12	0.491856	1	6.41656	1.12849	sp|O60443|DFNA5_HUMAN;tr|H7C3W1|H7C3W1_HUMAN;tr|H7C147|H7C147_HUMAN	sp|O60443|DFNA5_HUMAN;tr|H7C3W1|H7C3W1_HUMAN	494	O60443	GSDME_HUMAN	Gasdermin-E {ECO:0000305|PubMed:28459430}		GSDME
18.7175	16.5611	16.9409	1	15.1401	16.8397				alcohol metabolic process;aldehyde catabolic process;cellular response to oxidative stress;ethanol catabolic process;lipid metabolic process;neutrophil degranulation;oxidation-reduction process;sphingolipid biosynthetic process	3-chloroallyl aldehyde dehydrogenase activity;aldehyde dehydrogenase (NAD) activity;aldehyde dehydrogenase [NAD(P)+] activity	cytoplasm;cytosol;extracellular exosome;plasma membrane;secretory granule membrane;specific granule membrane;vesicle	beta-Alanine metabolism;Chemical carcinogenesis;Drug metabolism - cytochrome P450;Glycolysis / Gluconeogenesis;Histidine metabolism;Metabolic pathways;Metabolism of xenobiotics by cytochrome P450;Phenylalanine metabolism;Tyrosine metabolism			4	3	3	11.1	8.5	8.5	51.839	0.00041254	4.1412	33074000	4	0.562058	1	6.41324	1.26632	sp|P43353|AL3B1_HUMAN;sp|P48448|AL3B2_HUMAN;tr|A0A087X2D4|A0A087X2D4_HUMAN	sp|P43353|AL3B1_HUMAN;sp|P48448|AL3B2_HUMAN	1572	P43353	AL3B1_HUMAN	Aldehyde dehydrogenase family 3 member B1		ALDH3B1
19.575	17.2492	19.2568	1	16.6966	19.183						nuclear speck;nucleolus;nucleus;plasma membrane				1	1	1	7.4	7.4	7.4	29.647	0.002305	3.0178	32854000	4	0.485216	1	6.40046	1.11537	sp|Q15527|SURF2_HUMAN	sp|Q15527|SURF2_HUMAN	2609	Q15527	SURF2_HUMAN	Surfeit locus protein 2	urf-2	SURF2
18.2599	16.219	17.3855	1	15.8209	15.8613				actin filament bundle assembly;locomotory behavior;negative regulation of cytoskeleton organization;parallel actin filament bundle assembly;positive regulation of filopodium assembly;sensory perception of sound	actin filament binding;SH3 domain binding	brush border;cytoplasm;filamentous actin;microvillus;stereocilium tip				4	4	4	8.5	8.5	8.5	91.732	0	11.443	27343000	8	0.570784	1	6.39407	1.28337	sp|B1AK53|ESPN_HUMAN;tr|A0A0J9YWQ8|A0A0J9YWQ8_HUMAN;tr|A0A0A0MSQ4|A0A0A0MSQ4_HUMAN;tr|A0A0J9YY76|A0A0J9YY76_HUMAN;tr|H0Y7L4|H0Y7L4_HUMAN	sp|B1AK53|ESPN_HUMAN;tr|A0A0J9YWQ8|A0A0J9YWQ8_HUMAN;tr|A0A0A0MSQ4|A0A0A0MSQ4_HUMAN	194	B1AK53	ESPN_HUMAN	Espin		ESPN
20.7546	18.5375	19.3089	19.2311	1	19.2008					ubiquitin-protein transferase activity	anaphase-promoting complex				1	1	1	32.4	32.4	32.4	7.4424	0	11.407	13199000	2	0.45043	1	6.38968	1.04635	tr|F8WEU8|F8WEU8_HUMAN;sp|Q9UBF6|RBX2_HUMAN	tr|F8WEU8|F8WEU8_HUMAN;sp|Q9UBF6|RBX2_HUMAN	4955	F8WEU8	F8WEU8_HUMAN			RNF7
20.0678	17.3226	1	1	17.2389	1				transmembrane transport		integral component of membrane				1	1	1	7.9	7.9	7.9	18.967	0.00041374	4.1751	16264000	6	0.326164	1	6.38382	0.79353	tr|H3BT44|H3BT44_HUMAN;tr|H3BPQ9|H3BPQ9_HUMAN;sp|Q9H2V7|SPNS1_HUMAN;tr|H3BR82|H3BR82_HUMAN;tr|H3BMF4|H3BMF4_HUMAN	tr|H3BT44|H3BT44_HUMAN;tr|H3BPQ9|H3BPQ9_HUMAN;sp|Q9H2V7|SPNS1_HUMAN;tr|H3BR82|H3BR82_HUMAN;tr|H3BMF4|H3BMF4_HUMAN	4439	H3BT44	H3BT44_HUMAN			SPNS1
17.9544	1	17.6152	1	1	15.4824				canonical glycolysis;galactose catabolic process;glycogen biosynthetic process;glycogen catabolic process	glucose-1,6-bisphosphate synthase activity;metal ion binding;phosphoglucomutase activity	cytosol	Metabolic pathways;Starch and sucrose metabolism			3	3	3	6.6	6.6	6.6	70.441	0	5.4895	28158000	5	0.358689	1	6.3624	0.860906	sp|Q6PCE3|PGM2L_HUMAN	sp|Q6PCE3|PGM2L_HUMAN	3025	Q6PCE3	PGM2L_HUMAN	Glucose 1,6-bisphosphate synthase		PGM2L1
16.5511	17.5178	16.4577	14.4105	16.0674	1					aminopeptidase activity;manganese ion binding;metalloexopeptidase activity	cytoplasm;nucleus				2	2	2	6.7	6.7	6.7	55.86	0	15.246	21139000	4	0.5935	1	6.34959	1.32771	sp|Q8NDH3|PEPL1_HUMAN	sp|Q8NDH3|PEPL1_HUMAN	3482	Q8NDH3	PEPL1_HUMAN	Probable aminopeptidase NPEPL1		NPEPL1
20.664	17.9603	19.0646	19.2893	18.3709	1				cell differentiation;cell redox homeostasis;negative regulation of endoplasmic reticulum stress-induced intrinsic apoptotic signaling pathway	peptide disulfide oxidoreductase activity;protein-disulfide reductase (glutathione) activity	endoplasmic reticulum lumen	Glutathione metabolism;Metabolic pathways			6	6	6	53.5	53.5	53.5	19.206	0	11.201	51310000	8	0.455783	1	6.34288	1.057	sp|O95881|TXD12_HUMAN	sp|O95881|TXD12_HUMAN	804	O95881	TXD12_HUMAN	Thioredoxin domain-containing protein 12		TXNDC12
18.1212	17.1339	1	1	15.2674	1					symporter activity	integral component of membrane				1	1	1	2.8	2.8	2.8	47.099	0.0010121	3.7329	34894000	2	0.361156	1	6.32922	0.865974	tr|A0A087X0U3|A0A087X0U3_HUMAN;tr|A0A087WT87|A0A087WT87_HUMAN;sp|P43003|EAA1_HUMAN	tr|A0A087X0U3|A0A087X0U3_HUMAN;tr|A0A087WT87|A0A087WT87_HUMAN;sp|P43003|EAA1_HUMAN	1563	A0A087X0U3	A0A087X0U3_HUMAN	Amino acid transporter {ECO:0000256|RuleBase:RU361216}		SLC1A3
20.3673	17.3638	18.2624	19.7149	16.3051	1					metal ion transmembrane transporter activity	membrane				2	2	2	18.9	18.9	18.9	19.293	0	8.0283	67410000	8	0.470427	1	6.32454	1.08609	tr|J3QLB2|J3QLB2_HUMAN;tr|J3KRX2|J3KRX2_HUMAN;tr|J3QS49|J3QS49_HUMAN;sp|Q8N1S5|S39AB_HUMAN;tr|A0A0J9YXZ0|A0A0J9YXZ0_HUMAN;tr|A0A0J9YXE3|A0A0J9YXE3_HUMAN;tr|J3QQP1|J3QQP1_HUMAN;tr|J3QRN3|J3QRN3_HUMAN;tr|A0A0J9YXX3|A0A0J9YXX3_HUMAN;tr|J3KS66|J3KS66_HUMAN;tr|J3QLA9|J3QLA9_HUMAN	tr|J3QLB2|J3QLB2_HUMAN;tr|J3KRX2|J3KRX2_HUMAN;tr|J3QS49|J3QS49_HUMAN;sp|Q8N1S5|S39AB_HUMAN;tr|A0A0J9YXZ0|A0A0J9YXZ0_HUMAN;tr|A0A0J9YXE3|A0A0J9YXE3_HUMAN;tr|J3QQP1|J3QQP1_HUMAN;tr|J3QRN3|J3QRN3_HUMAN;tr|A0A0J9YXX3|A0A0J9YXX3_HUMAN;tr|J3KS66|J3KS66_HUMAN;tr|J3QLA9|J3QLA9_HUMAN	3380	J3QLB2	J3QLB2_HUMAN			SLC39A11
17.2715	17.4605	17.4368	15.8674	16.3468	1				DNA repair;global genome nucleotide-excision repair;intra-S DNA damage checkpoint;mismatch repair;nucleotide-excision repair;nucleotide-excision repair, DNA damage recognition;nucleotide-excision repair, DNA duplex unwinding;nucleotide-excision repair, preincision complex assembly;regulation of mitotic cell cycle phase transition;response to auditory stimulus;response to drug;response to UV-B;UV-…	bubble DNA binding;damaged DNA binding;heteroduplex DNA loop binding;single-stranded DNA binding	cytoplasm;extracellular exosome;intracellular membrane-bounded organelle;mitochondrion;nucleolus;nucleoplasm;nucleotide-excision repair factor 2 complex;nucleus;plasma membrane;XPC complex	Nucleotide excision repair			14	14	14	22.3	22.3	22.3	105.95	0	150.37	392320000	51	0.555815	1	6.31818	1.25411	sp|Q01831|XPC_HUMAN;tr|E7EUB5|E7EUB5_HUMAN	sp|Q01831|XPC_HUMAN	2147	Q01831	XPC_HUMAN	DNA repair protein complementing XP-C cells		XPC
18.6912	17.1512	17.065	1	16.1685	16.8106				mRNA splicing, via spliceosome	ATP binding;ATP-dependent RNA helicase activity;RNA binding	cytoplasm;spliceosomal complex				4	4	4	7.3	7.3	7.3	88.559	0	9.12	57356000	9	0.535775	1	6.30938	1.21487	sp|Q8IX18|DHX40_HUMAN;tr|J3KSW6|J3KSW6_HUMAN;tr|J3KSX9|J3KSX9_HUMAN;tr|J3KS08|J3KS08_HUMAN;tr|J3KTK0|J3KTK0_HUMAN;tr|F5H625|F5H625_HUMAN	sp|Q8IX18|DHX40_HUMAN;tr|J3KSW6|J3KSW6_HUMAN;tr|J3KSX9|J3KSX9_HUMAN	3316	Q8IX18	DHX40_HUMAN	Probable ATP-dependent RNA helicase DHX40		DHX40
18.1407	18.0045	1	1	16.2292	1				cellular response to calcium ion		cytoplasm;extracellular exosome;nucleus;plasma membrane				6	5	5	11.9	10.2	10.2	61.189	0	8.0909	31423000	4	0.342167	1	6.30533	0.82681	sp|Q96FN4|CPNE2_HUMAN;tr|H3BPR8|H3BPR8_HUMAN;tr|H3BUC8|H3BUC8_HUMAN	sp|Q96FN4|CPNE2_HUMAN	3877	Q96FN4	CPNE2_HUMAN	Copine-2 {ECO:0000305}		CPNE2
17.8204	17.484	17.8394	16.989	16.2821	1					actin filament binding;metal ion binding	actin cytoskeleton				14	1	1	49.1	3.6	3.6	47.401	0	6.7525	37706000	5	0.531157	1	6.2909	1.20582	tr|H0Y704|H0Y704_HUMAN	tr|H0Y704|H0Y704_HUMAN	5565	H0Y704	H0Y704_HUMAN			ZNF185
19.326	19.2308	1	1	18.7057	1				plasma membrane ATP synthesis coupled electron transport;respiratory chain complex IV assembly	copper ion binding;RNA binding	mitochondrial intermembrane space;mitochondrion;plasma membrane	Thermogenesis			2	2	2	21.6	21.6	21.6	14.116	0	6.9391	61191000	5	0.301066	1	6.28371	0.740773	sp|Q5JTJ3|COA6_HUMAN;tr|X6R5Z6|X6R5Z6_HUMAN	sp|Q5JTJ3|COA6_HUMAN;tr|X6R5Z6|X6R5Z6_HUMAN	2828	Q5JTJ3	COA6_HUMAN	Cytochrome c oxidase assembly factor 6 homolog		COA6
1	19.2923	19.4741	1	1	18.9896				cytidine to uridine editing	RNA binding					1	1	1	33.9	33.9	33.9	5.9175	0.0023037	3.0159	11087000	1	0.295986	1	6.25893	0.730005	tr|D6RCT1|D6RCT1_HUMAN;tr|D6RBP6|D6RBP6_HUMAN;tr|D6RA49|D6RA49_HUMAN;tr|D6RFL5|D6RFL5_HUMAN;tr|D6R9M7|D6R9M7_HUMAN;tr|D6REZ6|D6REZ6_HUMAN;tr|D6RBS9|D6RBS9_HUMAN;tr|D6R9D6|D6R9D6_HUMAN;sp|A0AV96|RBM47_HUMAN	tr|D6RCT1|D6RCT1_HUMAN;tr|D6RBP6|D6RBP6_HUMAN;tr|D6RA49|D6RA49_HUMAN;tr|D6RFL5|D6RFL5_HUMAN;tr|D6R9M7|D6R9M7_HUMAN;tr|D6REZ6|D6REZ6_HUMAN;tr|D6RBS9|D6RBS9_HUMAN;tr|D6R9D6|D6R9D6_HUMAN;sp|A0AV96|RBM47_HUMAN	163	D6RCT1	D6RCT1_HUMAN			RBM47
17.8083	16.4248	1	1	14.4902	1				cell proliferation;cell surface receptor signaling pathway;cell-cell adhesion;negative regulation of branching involved in ureteric bud morphogenesis;negative regulation of cell motility;negative regulation of epithelial cell migration;negative regulation of ruffle assembly;negative regulation of stress fiber assembly;negative regulation of substrate adhesion-dependent cell spreading;positive reg…	receptor activity	basal plasma membrane;cytosol;extracellular exosome;extracellular space;integral component of plasma membrane;lateral plasma membrane;membrane;nucleus				1	1	1	5	5	5	35.709	0.0053853	2.4789	9467300	1	0.373046	1	6.24761	0.890334	sp|P09758|TACD2_HUMAN	sp|P09758|TACD2_HUMAN	999	P09758	TACD2_HUMAN	Tumor-associated calcium signal transducer 2		TACSTD2
18.8881	15.7066	15.3704	1	15.1558	15.1253				negative regulation of DNA binding transcription factor activity;negative regulation of transcription from RNA polymerase II promoter;negative regulation of transcription, DNA-templated;proteasome-mediated ubiquitin-dependent protein catabolic process;protein polyubiquitination;protein ubiquitination;random inactivation of X chromosome;regulation of dosage compensation by inactivation of X chromo…	metal ion binding;transcription corepressor activity;ubiquitin protein ligase activity;ubiquitin-protein transferase activity	cytosol;nucleoplasm;nucleus;transcriptional repressor complex				2	2	2	4.6	4.6	4.6	68.548	0.0011993	3.5605	26244000	2	0.571851	1	6.22797	1.28546	sp|Q9NVW2|RNF12_HUMAN	sp|Q9NVW2|RNF12_HUMAN	4779	Q9NVW2	RNF12_HUMAN	E3 ubiquitin-protein ligase RLIM		RLIM
19.3888	18.311	1	18.0626	1	1						integral component of membrane				1	1	1	5.3	5.3	5.3	27.55	0.00041876	4.4087	25688000	4	0.307429	1	6.21243	0.754217	sp|Q5SWH9|TMM69_HUMAN	sp|Q5SWH9|TMM69_HUMAN	2854	Q5SWH9	TMM69_HUMAN	Transmembrane protein 69		TMEM69
17.5258	20.9341	19.1314	1	20.413	17.5522						mitochondrion				3	3	3	19.6	19.6	19.6	12.114	0	9.3107	62112000	5	0.433624	1	6.20873	1.01278	sp|Q53S33|BOLA3_HUMAN	sp|Q53S33|BOLA3_HUMAN	2789	Q53S33	BOLA3_HUMAN	BolA-like protein 3 {ECO:0000305}		BOLA3
18.7728	18.6028	1	1	17.7516	1				cell cycle;cell division;mRNA splicing, via spliceosome;RNA splicing, via transesterification reactions;spliceosomal complex assembly		cytosol;nuclear membrane;nucleoplasm;nucleus;spliceosomal complex;U4/U6 x U5 tri-snRNP complex;U5 snRNP	Spliceosome			2	2	2	16.2	16.2	16.2	16.786	0.00041494	4.2143	21960000	3	0.312299	1	6.20799	0.764475	sp|P83876|TXN4A_HUMAN;tr|K7EPA6|K7EPA6_HUMAN;tr|K7EJU2|K7EJU2_HUMAN;tr|K7ESL1|K7ESL1_HUMAN;tr|K7EMX5|K7EMX5_HUMAN;tr|O14835|O14835_HUMAN;tr|K7ES07|K7ES07_HUMAN	sp|P83876|TXN4A_HUMAN;tr|K7EPA6|K7EPA6_HUMAN;tr|K7EJU2|K7EJU2_HUMAN;tr|K7ESL1|K7ESL1_HUMAN;tr|K7EMX5|K7EMX5_HUMAN;tr|O14835|O14835_HUMAN;tr|K7ES07|K7ES07_HUMAN	2091	P83876	TXN4A_HUMAN	Thioredoxin-like protein 4A		TXNL4A
1	19.3115	18.9885	1	1	18.7321				mitochondrial translational elongation;mitochondrial translational termination;mRNA processing;negative regulation of mitotic nuclear division;positive regulation of proteolysis		intracellular membrane-bounded organelle;mitochondrial inner membrane;mitochondrion;nucleoplasm;nucleus;ribosome				1	1	1	5	5	5	22.354	0.0058997	2.3851	186070000	5	0.296794	1	6.1893	0.731719	sp|Q9NWT8|AKIP_HUMAN	sp|Q9NWT8|AKIP_HUMAN	4796	Q9NWT8	AKIP_HUMAN	Aurora kinase A-interacting protein	URKA-interacting protein	AURKAIP1
18.2102	16.6684	1	1	15.3133	1					RNA binding	nucleolus				3	3	3	8.1	8.1	8.1	51.588	0.00041675	4.3162	47983000	6	0.353455	1	6.18844	0.850133	sp|Q1ED39|KNOP1_HUMAN;tr|H3BPL4|H3BPL4_HUMAN	sp|Q1ED39|KNOP1_HUMAN;tr|H3BPL4|H3BPL4_HUMAN	2709	Q1ED39	KNOP1_HUMAN	Lysine-rich nucleolar protein 1		KNOP1
18.8343	17.8352	17.063	1	17.4871	16.7276				N-terminal peptidyl-methionine acetylation	peptide alpha-N-acetyltransferase activity	cytoplasm;cytosol;NatC complex;nucleus				5	5	5	22.7	22.7	22.7	39.319	0	13.366	49085000	12	0.499465	1	6.1726	1.1435	sp|Q147X3|NAA30_HUMAN;tr|J3KNC2|J3KNC2_HUMAN	sp|Q147X3|NAA30_HUMAN	2509	Q147X3	NAA30_HUMAN	N-alpha-acetyltransferase 30		NAA30
19.8494	1	19.2507	1	1	19.5837				rRNA processing;tRNA 5'-leader removal	ribonuclease P activity;RNA binding	multimeric ribonuclease P complex;nucleoplasm;nucleus	RNA transport			3	3	3	36.3	36.3	36.3	13.693	0	26.272	60113000	13	0.284273	1	6.17214	0.705048	sp|O95059|RPP14_HUMAN	sp|O95059|RPP14_HUMAN	707	O95059	RPP14_HUMAN	Ribonuclease P protein subunit p14		RPP14
19.4133	15.1894	1	1	15.0892	1					extracellularly glutamate-gated ion channel activity;ionotropic glutamate receptor activity	cell junction;integral component of membrane;postsynaptic membrane				1	1	1	2.2	2.2	2.2	82.108	0.0057206	2.3912	39980000	1	0.351996	1	6.17116	0.847123	tr|F8W7L6|F8W7L6_HUMAN;sp|P42262|GRIA2_HUMAN	tr|F8W7L6|F8W7L6_HUMAN;sp|P42262|GRIA2_HUMAN	1546	F8W7L6	F8W7L6_HUMAN			GRIA2
19.5266	1	19.2223	1	1	19.2379					GTPase activator activity	cytosol;Golgi apparatus;plasma membrane				3	1	1	13.1	4.4	4.4	27.131	0.0041206	2.6225	32765000	1	0.288921	1	6.17031	0.714973	tr|E9PN48|E9PN48_HUMAN	tr|E9PN48|E9PN48_HUMAN	5521	E9PN48	E9PN48_HUMAN			ARFGAP2
20.7657	1	20.2963	1	1	21.5612										2	2	2	38.9	38.9	38.9	7.8036	0.0011874	3.424	68148000	5	0.259806	1	6.16691	0.652313	tr|S4R329|S4R329_HUMAN;tr|H0YK61|H0YK61_HUMAN;tr|H0YNK0|H0YNK0_HUMAN;tr|H0YNK8|H0YNK8_HUMAN;tr|H0YLP8|H0YLP8_HUMAN;sp|Q5J8M3|EMC4_HUMAN	tr|S4R329|S4R329_HUMAN;tr|H0YK61|H0YK61_HUMAN;tr|H0YNK0|H0YNK0_HUMAN;tr|H0YNK8|H0YNK8_HUMAN;tr|H0YLP8|H0YLP8_HUMAN;sp|Q5J8M3|EMC4_HUMAN	2819	S4R329	S4R329_HUMAN			EMC4
17.8266	18.9621	18.6646	18.0348	1	17.9243				Arp2/3 complex-mediated actin nucleation;endosomal transport;retrograde transport, endosome to Golgi	actin binding;alpha-tubulin binding	cytosol;early endosome;early endosome membrane;recycling endosome;recycling endosome membrane;WASH complex				1	1	1	3.8	3.8	3.8	47.989	0	19.763	36976000	8	0.470999	1	6.16472	1.08723	sp|Q9NQA3|WASH6_HUMAN	sp|Q9NQA3|WASH6_HUMAN	4653	Q9NQA3	WASH6_HUMAN	WAS protein family homolog 6		WASH6P
1	17.3474	17.7637	1	15.6259	1				calcium ion-regulated exocytosis of neurotransmitter;exocytosis;intracellular protein transport;regulation of calcium ion-dependent exocytosis;vesicle fusion	calcium ion binding;calcium-dependent phospholipid binding;clathrin binding;neurexin family protein binding;Rab GTPase binding;syntaxin binding	exocytic vesicle;extracellular exosome;extrinsic component of plasma membrane;melanosome;microvillus membrane;plasma membrane;presynapse				7	7	7	17.3	17.3	17.3	61.856	0	12.486	71005000	12	0.346933	1	6.16174	0.836671	sp|Q8IYJ3|SYTL1_HUMAN;tr|A0A087X1N4|A0A087X1N4_HUMAN	sp|Q8IYJ3|SYTL1_HUMAN;tr|A0A087X1N4|A0A087X1N4_HUMAN	3341	Q8IYJ3	SYTL1_HUMAN	Synaptotagmin-like protein 1		SYTL1
19.9254	21.322	18.2222	1	19.8619	20.1317				purine nucleobase metabolic process;purine nucleotide metabolic process	GMP reductase activity;metal ion binding	GMP reductase complex				4	4	4	14.9	14.9	14.9	33.921	0	7.7828	130740000	9	0.408802	1	6.15866	0.962913	tr|H0YMB3|H0YMB3_HUMAN;tr|H0YLV5|H0YLV5_HUMAN;tr|A0A087WWM4|A0A087WWM4_HUMAN;sp|Q9P2T1|GMPR2_HUMAN;tr|F8WAN9|F8WAN9_HUMAN;tr|H0YNJ6|H0YNJ6_HUMAN;tr|H0YLB8|H0YLB8_HUMAN;tr|H0YK13|H0YK13_HUMAN;tr|H0YNS9|H0YNS9_HUMAN;tr|H0YK71|H0YK71_HUMAN;tr|H0YL68|H0YL68_HUMAN;tr|H0YKE1|H0YKE1_HUMAN;tr|H0YMR9|H0YMR9_HUMAN;tr|H0YMV5|H0YMV5_HUMAN;tr|H0YNH0|H0YNH0_HUMAN	tr|H0YMB3|H0YMB3_HUMAN;tr|H0YLV5|H0YLV5_HUMAN;tr|A0A087WWM4|A0A087WWM4_HUMAN;sp|Q9P2T1|GMPR2_HUMAN;tr|F8WAN9|F8WAN9_HUMAN;tr|H0YNJ6|H0YNJ6_HUMAN;tr|H0YLB8|H0YLB8_HUMAN;tr|H0YK13|H0YK13_HUMAN;tr|H0YNS9|H0YNS9_HUMAN;tr|H0YK71|H0YK71_HUMAN	4941	H0YMB3	H0YMB3_HUMAN	GMP reductase {ECO:0000256|HAMAP-Rule:MF_03195}	MPR {ECO:0000256|HAMAP-Rule:MF_03195}	GMPR2
18.851	17.9346	18.8941	1	17.6662	18.5511				mitochondrial translation;mitochondrial translational elongation;mitochondrial translational termination;translation	structural constituent of ribosome	cytosolic small ribosomal subunit;mitochondrial inner membrane;mitochondrial small ribosomal subunit	Ribosome			3	3	3	17.9	17.9	17.9	22.184	0.00021584	5.0872	54660000	3	0.465563	1	6.15418	1.07644	sp|Q9NVS2|RT18A_HUMAN;tr|Q5QPA5|Q5QPA5_HUMAN	sp|Q9NVS2|RT18A_HUMAN;tr|Q5QPA5|Q5QPA5_HUMAN	4772	Q9NVS2	RT18A_HUMAN	39S ribosomal protein S18a, mitochondrial	18mt-a;rps18a;RP-S18-a	MRPS18A
18.9619	16.4074	17.5331	17.4089	16.0741	1				inflammatory response;intracellular signal transduction;negative regulation of apoptotic process;peptidyl-serine phosphorylation;peptidyl-threonine phosphorylation;positive regulation of apoptotic process;positive regulation of CREB transcription factor activity;positive regulation of neuron projection development;positive regulation of neutrophil chemotaxis;positive regulation of phagocytosis;po…	ATP binding;calmodulin binding;calmodulin-dependent protein kinase activity	cytoplasm;nucleus	Aldosterone synthesis and secretion;Calcium signaling pathway;Glioma;Oxytocin signaling pathway			3	3	3	10.6	10.6	10.6	42.913	0	6.1837	34802000	5	0.505619	1	6.13978	1.15562	sp|Q8IU85|KCC1D_HUMAN;tr|A0A087WUR6|A0A087WUR6_HUMAN;tr|H7C071|H7C071_HUMAN;sp|Q14012|KCC1A_HUMAN	sp|Q8IU85|KCC1D_HUMAN;tr|A0A087WUR6|A0A087WUR6_HUMAN	3274	Q8IU85	KCC1D_HUMAN	Calcium/calmodulin-dependent protein kinase type 1D		CAMK1D
21.0101	17.2558	18.3644	1	18.9659	18.2562										4	4	4	39.4	39.4	39.4	13.847	0	6.6651	55493000	4	0.440407	1	6.13608	1.02635	tr|A6NCC9|A6NCC9_HUMAN;tr|E9PME3|E9PME3_HUMAN;tr|C9JHT9|C9JHT9_HUMAN;tr|C9JJV1|C9JJV1_HUMAN;sp|Q9Y5U2|TSSC4_HUMAN;tr|E9PL88|E9PL88_HUMAN;tr|C9JDU0|C9JDU0_HUMAN	tr|A6NCC9|A6NCC9_HUMAN;tr|E9PME3|E9PME3_HUMAN;tr|C9JHT9|C9JHT9_HUMAN;tr|C9JJV1|C9JJV1_HUMAN;sp|Q9Y5U2|TSSC4_HUMAN	5369	A6NCC9	A6NCC9_HUMAN			TSSC4
18.7974	18.0862	17.3083	1	17.354	17.4947										1	1	1	5.2	5.2	5.2	34.647	0.0011945	3.4985	19106000	1	0.484209	1	6.11444	1.11338	tr|Q5T063|Q5T063_HUMAN;sp|Q9NZJ6|COQ3_HUMAN	tr|Q5T063|Q5T063_HUMAN;sp|Q9NZJ6|COQ3_HUMAN	4876	Q5T063
19.2529	1	19.143	1	1	19.0765				cellular protein modification process;methionine metabolic process;protein repair;response to oxidative stress	peptide-methionine (S)-S-oxide reductase activity	actin cytoskeleton;cytosol;extracellular exosome;membrane;mitochondrion;nucleoplasm				2	2	2	14	14	14	26.132	0	7.2493	26347000	5	0.288557	1	6.10644	0.714197	sp|Q9UJ68|MSRA_HUMAN	sp|Q9UJ68|MSRA_HUMAN	5056	Q9UJ68	MSRA_HUMAN	Mitochondrial peptide methionine sulfoxide reductase		MSRA
20.0385	17.614	17.4322	18.33	17.4367	1				mRNA 3'-end processing;mRNA export from nucleus;mRNA processing;mRNA splice site selection;mRNA splicing, via spliceosome;negative regulation of mRNA splicing, via spliceosome;response to alkaloid;response to toxic substance;RNA export from nucleus;termination of RNA polymerase II transcription	protein domain specific binding;RNA binding	nucleolus;nucleoplasm	Herpes simplex virus 1 infection;Spliceosome			7	7	7	36.7	36.7	36.7	25.542	0	17.473	105740000	16	0.463316	1	6.10598	1.07198	sp|Q13242|SRSF9_HUMAN;tr|H0YIB4|H0YIB4_HUMAN;tr|S4R3G0|S4R3G0_HUMAN	sp|Q13242|SRSF9_HUMAN;tr|H0YIB4|H0YIB4_HUMAN;tr|S4R3G0|S4R3G0_HUMAN	2328	Q13242	SRSF9_HUMAN	Serine/arginine-rich splicing factor 9		SRSF9
19.3025	1	17.8956	1	1	17.8984				aerobic respiration;mitochondrial fission		mitochondrion				3	3	3	17.8	17.8	17.8	31.957	0	8.0222	19961000	5	0.305006	1	6.09992	0.749104	sp|Q9H019|MFR1L_HUMAN;tr|C9JF50|C9JF50_HUMAN;tr|E9PPF9|E9PPF9_HUMAN;tr|E9PLU1|E9PLU1_HUMAN;tr|E9PRK5|E9PRK5_HUMAN;tr|E9PLD2|E9PLD2_HUMAN;tr|E9PPQ0|E9PPQ0_HUMAN;tr|E9PRW1|E9PRW1_HUMAN;tr|E9PSD6|E9PSD6_HUMAN	sp|Q9H019|MFR1L_HUMAN;tr|C9JF50|C9JF50_HUMAN;tr|E9PPF9|E9PPF9_HUMAN;tr|E9PLU1|E9PLU1_HUMAN;tr|E9PRK5|E9PRK5_HUMAN;tr|E9PLD2|E9PLD2_HUMAN	4375	Q9H019	MFR1L_HUMAN	Mitochondrial fission regulator 1-like		MTFR1L
18.569	18.3192	18.2547	1	17.7525	18.0925				beta-catenin-TCF complex assembly;brain development;canonical Wnt signaling pathway;developmental growth;in utero embryonic development;kidney development;lens development in camera-type eye;mammary gland development;palate development;positive regulation of chromatin binding;post-embryonic development;regulation of histone H3-K4 methylation;regulation of mammary gland epithelial cell proliferati…	chromatin binding;histone acetyltransferase regulator activity;histone binding;metal ion binding	nucleoplasm				2	2	2	8.1	8.1	8.1	41.244	0.001183	3.3513	28323000	4	0.46784	1	6.09931	1.08096	sp|Q9BRQ0|PYGO2_HUMAN;tr|Q5T171|Q5T171_HUMAN	sp|Q9BRQ0|PYGO2_HUMAN;tr|Q5T171|Q5T171_HUMAN	4167	Q9BRQ0	PYGO2_HUMAN	Pygopus homolog 2		PYGO2
20.1107	18.6136	18.8528	19.7199	18.5866	1					nucleic acid binding					2	2	2	9.6	9.6	9.6	27.374	0	5.896	45965000	4	0.428275	1	6.09024	1.00207	tr|F6UGJ8|F6UGJ8_HUMAN;sp|O43414|ERI3_HUMAN;tr|F6QUN3|F6QUN3_HUMAN;tr|H0Y4B0|H0Y4B0_HUMAN	tr|F6UGJ8|F6UGJ8_HUMAN;sp|O43414|ERI3_HUMAN;tr|F6QUN3|F6QUN3_HUMAN;tr|H0Y4B0|H0Y4B0_HUMAN	418	F6UGJ8	F6UGJ8_HUMAN			ERI3
18.017	16.9715	17.5421	1	15.4943	17.7671				cornification;positive regulation of sodium ion transport	endopeptidase activity;serine-type endopeptidase activity;serine-type peptidase activity;sodium channel regulator activity	anchored component of plasma membrane;extracellular exosome;extracellular region;extracellular space;extrinsic component of plasma membrane;integral component of membrane;plasma membrane				2	2	2	7.6	7.6	7.6	36.431	0.00042096	4.5397	16861000	1	0.506684	1	6.08971	1.15772	sp|Q16651|PRSS8_HUMAN;tr|H3BVC8|H3BVC8_HUMAN;tr|H3BUJ8|H3BUJ8_HUMAN	sp|Q16651|PRSS8_HUMAN;tr|H3BVC8|H3BVC8_HUMAN;tr|H3BUJ8|H3BUJ8_HUMAN	2684	Q16651	PRSS8_HUMAN	Prostasin		PRSS8
18.9293	16.8805	17.4565	17.8684	16.144	1				positive regulation of transcription from RNA polymerase II promoter;post-translational protein modification;protein ubiquitination	ligand-dependent nuclear receptor transcription coactivator activity	Cul4-RING E3 ubiquitin ligase complex;cytosol;focal adhesion;nucleoplasm;nucleus				3	3	3	5.8	5.8	5.8	96.291	0	8.1808	54289000	6	0.491714	1	6.08463	1.12821	sp|Q58WW2|DCAF6_HUMAN	sp|Q58WW2|DCAF6_HUMAN	2799	Q58WW2	DCAF6_HUMAN	DDB1- and CUL4-associated factor 6		DCAF6
17.8823	18.4449	17.2765	1	17.8091	16.5465										3	3	3	24.8	24.8	24.8	13.303	0	6.4051	75316000	8	0.489189	1	6.08271	1.12322	tr|A0A087WYP2|A0A087WYP2_HUMAN;sp|Q8IZQ5|SELH_HUMAN;tr|H0YE28|H0YE28_HUMAN	tr|A0A087WYP2|A0A087WYP2_HUMAN;sp|Q8IZQ5|SELH_HUMAN;tr|H0YE28|H0YE28_HUMAN	3360	A0A087WYP2	A0A087WYP2_HUMAN			SELENOH
18.2782	21.4004	19.5056	1	20.4797	19.4581				IRE1-mediated unfolded protein response;protein targeting to ER	P-P-bond-hydrolysis-driven protein transmembrane transporter activity;protein transporter activity	cytosol;endoplasmic reticulum membrane;integral component of membrane;membrane	Phagosome;Protein export;Protein processing in endoplasmic reticulum;Vibrio cholerae infection			1	1	1	17.6	17.6	17.6	7.7412	0	9.2334	71725000	0	0.402961	1	6.08209	0.951121	sp|P60059|SC61G_HUMAN	sp|P60059|SC61G_HUMAN	1888	P60059	SC61G_HUMAN	Protein transport protein Sec61 subunit gamma		SEC61G
19.6324	16.2629	1	1	16.6549	1				negative regulation of lipid kinase activity;negative regulation of protein localization to plasma membrane;positive regulation of protein dephosphorylation;protein dephosphorylation;signal transduction	kinase binding;phosphoprotein phosphatase activity;protein phosphatase regulator activity	centrosome;chromosome, centromeric region;cytoplasm;cytosol;M band;nucleus;protein phosphatase type 2A complex;Z disc	Adrenergic signaling in cardiomyocytes;AMPK signaling pathway;Dopaminergic synapse;Human papillomavirus infection;mRNA surveillance pathway;Oocyte meiosis;PI3K-Akt signaling pathway;Sphingolipid signaling pathway			5	5	4	11.5	11.5	9.9	56.193	0.0011802	3.3118	36526000	4	0.321772	1	6.08012	0.784348	sp|Q15172|2A5A_HUMAN	sp|Q15172|2A5A_HUMAN	2568	Q15172	2A5A_HUMAN	Serine/threonine-protein phosphatase 2A 56 kDa regulatory subunit alpha isoform		PPP2R5A
18.3412	19.8051	17.5332	1	18.6951	17.7504				dendrite morphogenesis;lysosomal transport;lysosome localization;lysosome organization;positive regulation of dendrite development		endosome;extracellular exosome;integral component of membrane;late endosome membrane;lysosomal membrane;lysosome				3	3	3	13.5	13.5	13.5	31.127	0	6.1582	41015000	3	0.452525	1	6.078	1.05052	sp|Q9NUM4|T106B_HUMAN;tr|C9JZ87|C9JZ87_HUMAN;tr|F2Z3N7|F2Z3N7_HUMAN	sp|Q9NUM4|T106B_HUMAN;tr|C9JZ87|C9JZ87_HUMAN	4733	Q9NUM4	T106B_HUMAN	Transmembrane protein 106B		TMEM106B
17.9178	1	21.0097	1	1	19.7013					RNA binding					5	5	5	17.5	17.5	17.5	32.915	0	7.7466	108740000	7	0.277232	1	6.07539	0.68996	tr|H0YCB3|H0YCB3_HUMAN;sp|Q8N9N2|ASCC1_HUMAN;tr|H0YER2|H0YER2_HUMAN;tr|H0YE76|H0YE76_HUMAN;tr|E9PM82|E9PM82_HUMAN;tr|E9PKM6|E9PKM6_HUMAN;tr|E9PR40|E9PR40_HUMAN;tr|E9PQZ6|E9PQZ6_HUMAN	tr|H0YCB3|H0YCB3_HUMAN;sp|Q8N9N2|ASCC1_HUMAN;tr|H0YER2|H0YER2_HUMAN;tr|H0YE76|H0YE76_HUMAN	3439	H0YCB3	H0YCB3_HUMAN			ASCC1
18.9976	1	19.1119	1	1	18.9186				tetrahydrobiopterin biosynthetic process	6-pyruvoyltetrahydropterin synthase activity					1	1	1	15.6	15.6	15.6	8.9132	0.0057174	2.3871	11622000	0	0.288994	1	6.06366	0.715128	tr|E9PNN3|E9PNN3_HUMAN;sp|Q03393|PTPS_HUMAN	tr|E9PNN3|E9PNN3_HUMAN;sp|Q03393|PTPS_HUMAN	2176	E9PNN3	E9PNN3_HUMAN			PTS
19.3975	18.0872	18	1	17.9604	18.3414				translation	methyltransferase activity	mitochondrion;ribosome				10	10	10	23.9	23.9	23.9	50.733	0	48.34	452510000	43	0.455622	1	6.06098	1.05668	sp|Q9H7H0|MET17_HUMAN;tr|G3V353|G3V353_HUMAN;tr|G3V4P2|G3V4P2_HUMAN;tr|G3V3X6|G3V3X6_HUMAN;tr|H0YJW1|H0YJW1_HUMAN;tr|G3V4H5|G3V4H5_HUMAN;tr|B4E298|B4E298_HUMAN	sp|Q9H7H0|MET17_HUMAN	4507	Q9H7H0	MET17_HUMAN	Methyltransferase-like protein 17, mitochondrial		METTL17
15.2448	14.6744	1	1	10.8613	1				histone methylation;regulation of transcription, DNA-templated;transcription, DNA-templated	histone-lysine N-methyltransferase activity;metal ion binding	chromosome;nucleoplasm;nucleus	Lysine degradation			15	15	15	13.4	13.4	13.4	161.61	0	55.516	258060000	44	0.455333	1	6.0193	1.05611	sp|Q9BZ95|NSD3_HUMAN;tr|E9PKA2|E9PKA2_HUMAN;tr|H0YE68|H0YE68_HUMAN	sp|Q9BZ95|NSD3_HUMAN	4325	Q9BZ95	NSD3_HUMAN	Histone-lysine N-methyltransferase NSD3		NSD3
1	17.7524	17.9973	1	16.7138	1					exo-alpha-sialidase activity	integral component of membrane				1	1	1	5.2	5.2	5.2	29	0.0080571	2.2852	12929000	1	0.320723	1	6.01198	0.782154	tr|E9PIF4|E9PIF4_HUMAN;sp|Q99519|NEUR1_HUMAN	tr|E9PIF4|E9PIF4_HUMAN;sp|Q99519|NEUR1_HUMAN	4070	E9PIF4	E9PIF4_HUMAN			NEU1
1	16.4165	18.2285	1	15.6141	1				negative regulation of cell differentiation;negative regulation of cell migration;positive regulation of cell proliferation		Sin3 complex				3	3	3	20.8	20.8	20.8	24.852	0	7.664	41740000	4	0.339314	1	6.01031	0.820896	sp|Q9NP50|FA60A_HUMAN	sp|Q9NP50|FA60A_HUMAN	4619	Q9NP50	SHCAF_HUMAN	SIN3-HDAC complex-associated factor {ECO:0000312|HGNC:HGNC:30702}		SINHCAF
18.3233	17.974	1	1	17.2686	1				apoptotic process;cell cycle arrest;cell growth;cellular protein localization;cellular response to amino acid starvation;cellular response to amino acid stimulus;positive regulation of TOR signaling;regulation of autophagy;regulation of macroautophagy;regulation of TOR signaling;regulation of TORC1 signaling;response to amino acid;RNA splicing;small GTPase mediated signal transduction;transcripti…	GDP binding;GTP binding;GTPase activity;GTPase binding;magnesium ion binding;protein heterodimerization activity	cytoplasm;cytosol;EGO complex;Gtr1-Gtr2 GTPase complex;intracellular membrane-bounded organelle;lysosome;nucleus	Autophagy - animal;mTOR signaling pathway			3	3	3	8.5	8.5	8.5	44.223	0.0010126	3.7441	37481000	2	0.31143	1	6.00957	0.762647	sp|Q9HB90|RRAGC_HUMAN;sp|Q9NQL2|RRAGD_HUMAN	sp|Q9HB90|RRAGC_HUMAN;sp|Q9NQL2|RRAGD_HUMAN	4571	Q9HB90	RRAGC_HUMAN	Ras-related GTP-binding protein C	ag C;agC	RRAGC
19.3537	17.1648	17.5727	18.6219	16.4507	1				cell redox homeostasis;oxidation-reduction process;protein folding;response to endoplasmic reticulum stress	protein disulfide isomerase activity	endoplasmic reticulum;integral component of membrane				3	3	3	10.3	10.3	10.3	38.952	0	8.0362	28257000	3	0.464741	1	6.00621	1.07481	sp|Q9H1E5|TMX4_HUMAN	sp|Q9H1E5|TMX4_HUMAN	4414	Q9H1E5	TMX4_HUMAN	Thioredoxin-related transmembrane protein 4		TMX4
20.0603	16.0586	1	1	1	17.1295										5	5	5	26.4	26.4	26.4	39.97	0	17.391	93485000	15	0.309238	1	5.99645	0.75803	tr|F6WFU6|F6WFU6_HUMAN;sp|Q9NZJ7|MTCH1_HUMAN;tr|H0Y8C3|H0Y8C3_HUMAN	tr|F6WFU6|F6WFU6_HUMAN;sp|Q9NZJ7|MTCH1_HUMAN;tr|H0Y8C3|H0Y8C3_HUMAN	4877	F6WFU6
19.0064	18.6797	16.0599	17.2217	17.562	1				mRNA splicing, via spliceosome	peptidyl-prolyl cis-trans isomerase activity	catalytic step 2 spliceosome;nuclear body;nucleoplasm				6	6	6	12.2	12.2	12.2	73.574	0	17.311	96943000	15	0.467367	1	5.98743	1.08002	sp|Q96BP3|PPWD1_HUMAN;tr|F5H7P7|F5H7P7_HUMAN;tr|D6RB19|D6RB19_HUMAN;tr|D6RHV0|D6RHV0_HUMAN;tr|D6RA12|D6RA12_HUMAN;tr|D6RDA4|D6RDA4_HUMAN;tr|H0Y8N5|H0Y8N5_HUMAN	sp|Q96BP3|PPWD1_HUMAN;tr|F5H7P7|F5H7P7_HUMAN;tr|D6RB19|D6RB19_HUMAN;tr|D6RHV0|D6RHV0_HUMAN	3810	Q96BP3	PPWD1_HUMAN	Peptidylprolyl isomerase domain and WD repeat-containing protein 1		PPWD1
18.4523	1	20.0051	1	1	19.522										4	4	4	33.1	33.1	33.1	16.324	0	7.5298	50114000	6	0.276893	1	5.97847	0.689232	tr|H3BSW0|H3BSW0_HUMAN;sp|Q8N9N7|LRC57_HUMAN	tr|H3BSW0|H3BSW0_HUMAN;sp|Q8N9N7|LRC57_HUMAN	3440	H3BSW0	H3BSW0_HUMAN			LRRC57
19.3252	18.8045	18.7843	19.222	1	18.7711				negative regulation of defense response to virus;negative regulation of I-kappaB kinase/NF-kappaB signaling;negative regulation of interferon-beta production;negative regulation of NF-kappaB import into nucleus;N-terminal protein myristoylation;peptidyl-threonine dephosphorylation;protein dephosphorylation	magnesium ion binding;manganese ion binding;protein serine/threonine phosphatase activity	cytosol;membrane;nucleolus	MAPK signaling pathway			6	6	4	16.1	16.1	11.5	52.642	0	15.354	103870000	15	0.424815	1	5.97364	0.995128	sp|O75688|PPM1B_HUMAN;tr|B8ZZF0|B8ZZF0_HUMAN;tr|C9JIR6|C9JIR6_HUMAN	sp|O75688|PPM1B_HUMAN;tr|B8ZZF0|B8ZZF0_HUMAN;tr|C9JIR6|C9JIR6_HUMAN	623	O75688	PPM1B_HUMAN	Protein phosphatase 1B		PPM1B
18.3566	17.8399	1	1	17.3032	1				covalent chromatin modification;gamete generation;meiotic cell cycle;multicellular organism development;positive regulation of transcription, DNA-templated;positive regulation of Wnt signaling pathway;rRNA transcription;Wnt signaling pathway	methylated histone binding	cytosol;nuclear membrane;nucleolus;nucleoplasm;nucleus;spindle				4	4	4	24.8	24.8	24.8	29.6	0	6.7426	42279000	5	0.308867	1	5.96442	0.757248	sp|Q9Y657|SPIN1_HUMAN;sp|Q5JUX0|SPIN3_HUMAN	sp|Q9Y657|SPIN1_HUMAN	5388	Q9Y657	SPIN1_HUMAN	Spindlin-1		SPIN1
18.3878	1	19.2269	1	1	18.7398										5	5	5	16.8	16.8	16.8	53.567	0	7.5167	35911000	5	0.286984	1	5.95831	0.71084	tr|E7ENA2|E7ENA2_HUMAN;tr|D3YTF8|D3YTF8_HUMAN;tr|D3YTF9|D3YTF9_HUMAN;sp|Q9NNW7|TRXR2_HUMAN;tr|A0A096LNN4|A0A096LNN4_HUMAN;tr|A0A096LPK7|A0A096LPK7_HUMAN;tr|A0A096LPH4|A0A096LPH4_HUMAN;tr|A0A096LP96|A0A096LP96_HUMAN;tr|A0A096LPB7|A0A096LPB7_HUMAN;tr|A0A096LPD9|A0A096LPD9_HUMAN;tr|E7EWK1|E7EWK1_HUMAN	tr|E7ENA2|E7ENA2_HUMAN;tr|D3YTF8|D3YTF8_HUMAN;tr|D3YTF9|D3YTF9_HUMAN;sp|Q9NNW7|TRXR2_HUMAN;tr|A0A096LNN4|A0A096LNN4_HUMAN;tr|A0A096LPK7|A0A096LPK7_HUMAN	4617	E7ENA2
19.6298	1	19.1218	1	1	19.8809				gluconeogenesis;glucose homeostasis;histone H3-K9 acetylation;positive regulation of CREB transcription factor activity;positive regulation of transcription from RNA polymerase II promoter;protein homotetramerization;toxin transport;transcription, DNA-templated;viral process	cAMP response element binding protein binding;chromatin binding	cytoplasm;extracellular exosome;nucleoplasm;nucleus	AMPK signaling pathway;Glucagon signaling pathway;Human T-cell leukemia virus 1 infection;Insulin resistance;PI3K-Akt signaling pathway			1	1	1	1.7	1.7	1.7	73.301	0.0026646	2.8766	44878000	2	0.271762	1	5.95688	0.678189	sp|Q53ET0|CRTC2_HUMAN	sp|Q53ET0|CRTC2_HUMAN	2770	Q53ET0	CRTC2_HUMAN	CREB-regulated transcription coactivator 2		CRTC2
21.1052	1	17.801	20.049	1	1				cellular iron ion homeostasis;Fc-epsilon receptor signaling pathway;G2/M transition of mitotic cell cycle;histone H2A monoubiquitination;maintenance of protein location in nucleus;negative regulation of G2/M transition of mitotic cell cycle;NIK/NF-kappaB signaling;positive regulation of ubiquitin-protein ligase activity involved in regulation of mitotic cell cycle transition;post-translational pr…	beta-catenin binding;cullin family protein binding;protein domain specific binding;ubiquitin-protein transferase activity	Cul7-RING ubiquitin ligase complex;cytoplasm;cytosol;extracellular exosome;nucleoplasm;nucleus;SCF ubiquitin ligase complex	Cell cycle;Circadian rhythm;Human immunodeficiency virus 1 infection;Oocyte meiosis;Pathways in cancer;Protein processing in endoplasmic reticulum;TGF-beta signaling pathway;Ubiquitin mediated proteolysis;Wnt signaling pathway			4	4	4	28.2	28.2	28.2	18.658	0	26.041	47938000	5	0.267704	1	5.95241	0.66943	sp|P63208|SKP1_HUMAN;tr|E5RJR5|E5RJR5_HUMAN;tr|E7ERH2|E7ERH2_HUMAN;tr|F8W8N3|F8W8N3_HUMAN;tr|E5RGM3|E5RGM3_HUMAN	sp|P63208|SKP1_HUMAN;tr|E5RJR5|E5RJR5_HUMAN;tr|E7ERH2|E7ERH2_HUMAN;tr|F8W8N3|F8W8N3_HUMAN	2028	P63208	SKP1_HUMAN	S-phase kinase-associated protein 1		SKP1
18.1692	1	18.6328	1	1	17.9514				nervous system development		integral component of membrane;mitochondrion				1	1	1	5	5	5	22.049	0.00081599	3.8971	30870000	3	0.298202	1	5.95018	0.734705	sp|A0PJW6|TM223_HUMAN	sp|A0PJW6|TM223_HUMAN	168	A0PJW6	TM223_HUMAN	Transmembrane protein 223		TMEM223
18.5811	17.2071	1	1	16.9423	1				positive regulation of gene expression, epigenetic;regulation of transcription, DNA-templated;termination of RNA polymerase I transcription;transcription elongation from RNA polymerase I promoter;transcription from RNA polymerase I promoter;transcription from RNA polymerase II promoter;transcription initiation from RNA polymerase I promoter	DNA binding	intracellular membrane-bounded organelle;microtubule cytoskeleton;nucleoplasm;nucleus;RNA polymerase I transcription factor complex				2	2	2	4.9	4.9	4.9	52.675	0.0057227	2.3938	49878000	1	0.313629	1	5.94867	0.767271	sp|Q15573|TAF1A_HUMAN;tr|Q5JRA7|Q5JRA7_HUMAN	sp|Q15573|TAF1A_HUMAN;tr|Q5JRA7|Q5JRA7_HUMAN	2616	Q15573	TAF1A_HUMAN	TATA box-binding protein-associated factor RNA polymerase I subunit A		TAF1A
18.867	1	17.8006	1	1	17.8381				neutrophil degranulation	nucleic acid binding;transferase activity;zinc ion binding	extracellular region;ficolin-1-rich granule lumen				2	2	2	11.5	11.5	11.5	41.945	0	10.604	20739000	5	0.299411	1	5.94321	0.737268	sp|Q9P0J7|KCMF1_HUMAN	sp|Q9P0J7|KCMF1_HUMAN	4905	Q9P0J7	KCMF1_HUMAN	E3 ubiquitin-protein ligase KCMF1		KCMF1
18.3014	17.9119	15.6004	1	17.9302	15.072				transcription initiation from RNA polymerase II promoter	RNA polymerase II transcription cofactor activity	cytoplasm;mediator complex;membrane;nucleoplasm;nucleus				7	7	7	13.1	13.1	13.1	86.753	0	33.11	103380000	17	0.487676	1	5.93718	1.12023	sp|Q96RN5|MED15_HUMAN;tr|G3V1P5|G3V1P5_HUMAN;tr|F8WDM6|F8WDM6_HUMAN;tr|F2Z2B7|F2Z2B7_HUMAN;tr|H7C308|H7C308_HUMAN	sp|Q96RN5|MED15_HUMAN;tr|G3V1P5|G3V1P5_HUMAN	4019	Q96RN5	MED15_HUMAN	Mediator of RNA polymerase II transcription subunit 15		MED15
18.653	1	18.2595	1	1	18.1055				box C/D snoRNA 3'-end processing;histone glutamine methylation;rRNA methylation;tRNA processing	histone-glutamine methyltransferase activity;RNA binding;rRNA methyltransferase activity	box C/D snoRNP complex;Cajal body;fibrillar center;nucleus;small-subunit processome				5	2	2	15	3.6	3.6	34.803	0.00021598	5.1082	96940000	8	0.295289	1	5.93566	0.728525	sp|A6NHQ2|FBLL1_HUMAN	sp|A6NHQ2|FBLL1_HUMAN	185	A6NHQ2	FBLL1_HUMAN	rRNA/tRNA 2'-O-methyltransferase fibrillarin-like protein 1		FBLL1
19.3051	16.7396	1	1	17.2431	1				apoptotic process;FMN biosynthetic process;positive regulation of NAD(P)H oxidase activity;reactive oxygen species metabolic process;riboflavin biosynthetic process;riboflavin metabolic process	ATP binding;metal ion binding;riboflavin kinase activity	cytoplasm;cytosol;mitochondrion	Metabolic pathways;Riboflavin metabolism			2	2	2	20.6	20.6	20.6	17.623	0	5.7805	8150700	2	0.306966	1	5.93387	0.753241	sp|Q969G6|RIFK_HUMAN;tr|H7C4G0|H7C4G0_HUMAN	sp|Q969G6|RIFK_HUMAN;tr|H7C4G0|H7C4G0_HUMAN	3759	Q969G6	RIFK_HUMAN	Riboflavin kinase		RFK
18.8739	18.0703	18.8225	1	18.2833	18.7121					protein homodimerization activity	endosome;extracellular exosome;integral component of membrane;late endosome;lysosomal membrane;lysosome;nucleoplasm;perinuclear region of cytoplasm				2	2	2	9.6	9.6	9.6	30.922	0.0004128	4.1447	52331000	10	0.434431	1	5.92375	1.0144	sp|Q8IY95|TM192_HUMAN	sp|Q8IY95|TM192_HUMAN	3335	Q8IY95	TM192_HUMAN	Transmembrane protein 192		TMEM192
19.1533	15.2769	18.8117	1	15.2406	19.2743					RNA binding					7	1	1	63.6	12.1	12.1	15.46	0	14.082	19796000	3	0.447436	1	5.90899	1.04038	tr|J3KTC1|J3KTC1_HUMAN	tr|J3KTC1|J3KTC1_HUMAN	5588	J3KTC1	J3KTC1_HUMAN			MSI2
20.4641	17.7704	18.0817	20.0091	17.6243	1				intraciliary transport involved in cilium assembly;microtubule-based movement;visual behavior	dynein intermediate chain binding;microtubule motor activity	centrosome;ciliary tip;cilium;cytoplasm;cytoplasmic dynein complex;membrane;microtubule;outer dynein arm				2	2	2	29.2	29.2	29.2	10.921	0	5.9463	22631000	3	0.415325	1	5.8943	0.976057	sp|Q9NP97|DLRB1_HUMAN;tr|B1AKR6|B1AKR6_HUMAN;sp|Q8TF09|DLRB2_HUMAN;tr|H3BQI1|H3BQI1_HUMAN	sp|Q9NP97|DLRB1_HUMAN;tr|B1AKR6|B1AKR6_HUMAN;sp|Q8TF09|DLRB2_HUMAN;tr|H3BQI1|H3BQI1_HUMAN	4628	Q9NP97	DLRB1_HUMAN	Dynein light chain roadblock-type 1		DYNLRB1
18.2017	1	18.2885	1	1	17.8093				mRNA splicing, via spliceosome	RNA binding	intracellular membrane-bounded organelle;nucleolus;nucleus	Spliceosome			1	1	1	5	5	5	32.688	0.0011837	3.3676	22913000	2	0.297959	1	5.89364	0.734191	sp|Q13595|TRA2A_HUMAN	sp|Q13595|TRA2A_HUMAN	2387	Q13595	TRA2A_HUMAN	Transformer-2 protein homolog alpha	RA-2 alpha;RA2-alpha	TRA2A
18.8976	16.3817	1	1	16.6298	1				cell cycle;negative regulation of fat cell proliferation;positive regulation of cell proliferation;positive regulation of transcription from RNA polymerase II promoter;positive regulation of vascular associated smooth muscle cell apoptotic process;transcription initiation from RNA polymerase II promoter	core promoter binding;DNA binding transcription factor activity;protein dimerization activity;sequence-specific DNA binding;transcriptional activator activity, RNA polymerase II transcription regulatory region sequence-specific DNA binding	cytosol;nucleoplasm;RNA polymerase II transcription factor complex	Bladder cancer;Breast cancer;Cell cycle;Cellular senescence;Chronic myeloid leukemia;Cushing syndrome;Endocrine resistance;Epstein-Barr virus infection;Gastric cancer;Glioma;Hepatitis B;Hepatitis C;Hepatocellular carcinoma;Human cytomegalovirus infection;Human T-cell leukemia virus 1 infection;Kaposi sarcoma-associated herpesvirus infection;Melanoma;MicroRNAs in cancer;Non-small cell lung cancer;…			2	2	2	4.3	4.3	4.3	49.161	0.00041425	4.1875	38379000	5	0.314744	1	5.88316	0.769614	sp|O00716|E2F3_HUMAN	sp|O00716|E2F3_HUMAN	262	O00716	E2F3_HUMAN	Transcription factor E2F3	2F-3	E2F3
18.1301	14.905	17.0852	15.3379	1	16.1469				calcium-dependent cell-cell adhesion via plasma membrane cell adhesion molecules;multicellular organism development		cytoplasm;nucleus;plasma membrane				4	4	4	7.4	7.4	7.4	96.827	0	8.4344	42808000	9	0.514559	1	5.8785	1.17322	tr|C9JJX6|C9JJX6_HUMAN;tr|E9PDC3|E9PDC3_HUMAN;sp|O00192|ARVC_HUMAN	tr|C9JJX6|C9JJX6_HUMAN;tr|E9PDC3|E9PDC3_HUMAN;sp|O00192|ARVC_HUMAN	210	C9JJX6	C9JJX6_HUMAN			ARVCF
20.0359	15.7176	17.3233	19.5304	14.9186	1				3'-phosphoadenosine 5'-phosphosulfate biosynthetic process;blood coagulation;bone development;skeletal system development;sulfate assimilation	adenylylsulfate kinase activity;ATP binding;nucleotidyltransferase activity;sulfate adenylyltransferase (ATP) activity	cytosol	Metabolic pathways;Purine metabolism;Selenocompound metabolism;Sulfur metabolism			10	9	9	18.9	16.6	16.6	69.5	0	20.201	140930000	9	0.441734	1	5.87598	1.029	sp|O95340|PAPS2_HUMAN	sp|O95340|PAPS2_HUMAN	742	O95340	PAPS2_HUMAN	Bifunctional 3'-phosphoadenosine 5'-phosphosulfate synthase 2	APS synthase 2;APSS 2	PAPSS2
19.1045	18.667	1	19.1578	1	1				miRNA loading onto RISC involved in gene silencing by miRNA;pre-miRNA processing;production of siRNA involved in RNA interference;regulation of viral transcription	double-stranded RNA binding;siRNA binding	RISC complex				2	2	2	30.7	30.7	30.7	9.3606	0.00042427	4.7045	10954000	1	0.277715	1	5.87121	0.690997	tr|F8VYK6|F8VYK6_HUMAN;tr|F8VZZ7|F8VZZ7_HUMAN;tr|F8VP94|F8VP94_HUMAN;tr|F8VYK3|F8VYK3_HUMAN;sp|Q15633|TRBP2_HUMAN;tr|F8VTT7|F8VTT7_HUMAN;tr|F8VZ57|F8VZ57_HUMAN	tr|F8VYK6|F8VYK6_HUMAN;tr|F8VZZ7|F8VZZ7_HUMAN;tr|F8VP94|F8VP94_HUMAN;tr|F8VYK3|F8VYK3_HUMAN;sp|Q15633|TRBP2_HUMAN;tr|F8VTT7|F8VTT7_HUMAN;tr|F8VZ57|F8VZ57_HUMAN	2622	F8VYK6	F8VYK6_HUMAN			TARBP2
16.7244	16.1296	1	1	14.2416	1				ameboidal-type cell migration;cell cycle;cell division;centromere complex assembly;metabolic process;pericentric heterochromatin assembly;positive regulation of cytokinesis;regulation of chromosome organization	carbon-sulfur lyase activity	condensed chromosome kinetochore;cytosol;kinetochore;microtubule cytoskeleton;nucleoplasm;nucleus;spindle midzone				2	2	2	13.5	13.5	13.5	29.946	0.0028436	2.7902	30842000	5	0.361179	1	5.8708	0.866023	sp|Q7Z7K6|CENPV_HUMAN;tr|A0A0M3HER2|A0A0M3HER2_HUMAN	sp|Q7Z7K6|CENPV_HUMAN;tr|A0A0M3HER2|A0A0M3HER2_HUMAN	3199	Q7Z7K6	CENPV_HUMAN	Centromere protein V	ENP-V	CENPV
17.6487	14.2604	16.9753	1	14.1853	16.1074				selenocysteine incorporation	RNA binding	cytoplasm;nucleus				1	1	1	7	7	7	32.498	0.001182	3.3354	5616800	1	0.531593	1	5.86394	1.20667	sp|Q9NX07|TSAP1_HUMAN	sp|Q9NX07|TSAP1_HUMAN	4806	Q9NX07	TSAP1_HUMAN	tRNA selenocysteine 1-associated protein 1		TRNAU1AP
17.7982	16.6001	1	1	15.8384	1					metal ion binding	nucleolus				1	1	1	4.6	4.6	4.6	45.341	0.00042212	4.6091	19636000	3	0.328524	1	5.85331	0.798454	tr|J3QT87|J3QT87_HUMAN;sp|Q96SW2|CRBN_HUMAN	tr|J3QT87|J3QT87_HUMAN;sp|Q96SW2|CRBN_HUMAN	4044	J3QT87	J3QT87_HUMAN			CRBN
17.8598	17.2455	17.081	1	16.6254	17.02				retrograde transport, endosome to Golgi		cytosol;Golgi membrane;integral component of membrane				1	1	1	2.2	2.2	2.2	63.535	0.00081185	3.8115	32860000	6	0.481093	1	5.84698	1.10722	sp|Q96K49|TM87B_HUMAN	sp|Q96K49|TM87B_HUMAN	3953	Q96K49	TM87B_HUMAN	Transmembrane protein 87B {ECO:0000305}		TMEM87B
18.4217	1	17.5419	1	1	17.497				DNA repair;global genome nucleotide-excision repair;histone H2A monoubiquitination;nucleotide-excision repair;nucleotide-excision repair, DNA damage recognition;nucleotide-excision repair, DNA duplex unwinding;nucleotide-excision repair, DNA incision;nucleotide-excision repair, DNA incision, 3'-to lesion;nucleotide-excision repair, DNA incision, 5'-to lesion;nucleotide-excision repair, preincisio…	damaged DNA binding;DNA binding;protein complex binding	cell junction;Cul4B-RING E3 ubiquitin ligase complex;Cul4-RING E3 ubiquitin ligase complex;nucleoplasm;protein complex	Basal cell carcinoma;Breast cancer;Chronic myeloid leukemia;Colorectal cancer;Endometrial cancer;Epstein-Barr virus infection;Gastric cancer;Glioma;Hepatitis B;Hepatocellular carcinoma;Melanoma;Non-small cell lung cancer;Nucleotide excision repair;p53 signaling pathway;Pancreatic cancer;Pathways in cancer;Small cell lung cancer;Thyroid cancer;Transcriptional misregulation in cancer;Ubiquitin medi…			5	5	5	16.9	16.9	16.9	47.863	0	41.042	22735000	6	0.299457	1	5.82219	0.737365	sp|Q92466|DDB2_HUMAN;tr|A0A087X0X5|A0A087X0X5_HUMAN;tr|A0A087WYT8|A0A087WYT8_HUMAN;tr|A0A087WW71|A0A087WW71_HUMAN	sp|Q92466|DDB2_HUMAN;tr|A0A087X0X5|A0A087X0X5_HUMAN	3662	Q92466	DDB2_HUMAN	DNA damage-binding protein 2		DDB2
17.915	16.891	17.923	1	16.9886	17.2802				negative regulation of transcription from RNA polymerase II promoter;transcription, DNA-templated		nuclear speck;Sin3-type complex				4	4	4	4.2	4.2	4.2	110.32	0	14.142	112470000	13	0.46728	1	5.82006	1.07985	sp|Q9H0E3|SP130_HUMAN;tr|H7BXF5|H7BXF5_HUMAN;tr|C9J683|C9J683_HUMAN	sp|Q9H0E3|SP130_HUMAN;tr|H7BXF5|H7BXF5_HUMAN	4388	Q9H0E3	SP130_HUMAN	Histone deacetylase complex subunit SAP130		SAP130
18.1495	15.174	1	1	14.877	1				apoptotic process;multicellular organismal lipid catabolic process;negative regulation of peptidyl-lysine acetylation;steroid biosynthetic process	hydrolase activity;nucleotide binding	mitochondrion;nucleolus				1	1	1	12.3	12.3	12.3	17.162	0.0071652	2.3218	4345000	1	0.342504	1	5.81552	0.827509	sp|Q9BX68|HINT2_HUMAN	sp|Q9BX68|HINT2_HUMAN	4287	Q9BX68	HINT2_HUMAN	Histidine triad nucleotide-binding protein 2, mitochondrial	INT-2	HINT2
18.6083	1	17.195	1	1	17.3621										2	2	2	16.6	16.6	16.6	17.574	0	6.1489	21850000	1	0.300897	1	5.81373	0.740415	tr|B9A054|B9A054_HUMAN;sp|Q8TEB9|RHBL4_HUMAN	tr|B9A054|B9A054_HUMAN;sp|Q8TEB9|RHBL4_HUMAN	3575	B9A054	B9A054_HUMAN			RHBDD1
17.3202	15.618	17.7677	1	15.4715	16.7934				neuron differentiation	RNA binding	extracellular region;nucleus				1	1	1	6.9	6.9	6.9	32.407	0.0011902	3.4538	12480000	2	0.497572	1	5.81368	1.13977	sp|Q9NPE2|NGRN_HUMAN	sp|Q9NPE2|NGRN_HUMAN	4634	Q9NPE2	NGRN_HUMAN	Neugrin		NGRN
18.3016	17.561	1	1	17.437	1										4	4	4	20.1	20.1	20.1	24.605	0	7.9999	45503000	5	0.299841	1	5.80855	0.73818	tr|Q5VXN0|Q5VXN0_HUMAN;sp|Q9H7B2|RPF2_HUMAN	tr|Q5VXN0|Q5VXN0_HUMAN;sp|Q9H7B2|RPF2_HUMAN	4502	Q5VXN0	Q5VXN0_HUMAN			RPF2
18.2024	20.4867	1	1	20.2704	1				metabolic process	hydrolase activity	mitochondrion				3	3	3	19.1	19.1	19.1	28	0.00042599	4.7961	74172000	3	0.260073	1	5.80624	0.652893	sp|Q9BSH5|HDHD3_HUMAN	sp|Q9BSH5|HDHD3_HUMAN	4184	Q9BSH5	HDHD3_HUMAN	Haloacid dehalogenase-like hydrolase domain-containing protein 3		HDHD3
18.8033	1	17.7623	1	1	18.1507				positive regulation of transcription from RNA polymerase II promoter;regulation of transcription from RNA polymerase II promoter;RNA polymerase II transcriptional preinitiation complex assembly;transcription initiation from RNA polymerase II promoter	RNA polymerase II transcription coactivator activity involved in preinitiation complex assembly;transcription coactivator activity;transcription factor binding	core mediator complex;mediator complex;membrane;nucleoplasm;nucleus				4	4	4	13.8	13.8	13.8	28.424	0	7.9204	117050000	12	0.288816	1	5.80496	0.714749	sp|O75586|MED6_HUMAN;tr|G3V4A5|G3V4A5_HUMAN;tr|A0A087WYL7|A0A087WYL7_HUMAN	sp|O75586|MED6_HUMAN;tr|G3V4A5|G3V4A5_HUMAN;tr|A0A087WYL7|A0A087WYL7_HUMAN	610	O75586	MED6_HUMAN	Mediator of RNA polymerase II transcription subunit 6		MED6
17.8885	15.3346	1	1	14.81	1				intracellular protein transport	Ran GTPase binding	intracellular				8	1	1	60.4	13.2	13.2	20.487	0.00041938	4.4433	3989200	1	0.344079	1	5.80435	0.830769	tr|H0Y3V4|H0Y3V4_HUMAN	tr|H0Y3V4|H0Y3V4_HUMAN	5558	H0Y3V4	H0Y3V4_HUMAN			IPO5
18.2901	1	17.1761	1	1	17.0545				actin filament organization;cell migration;dendritic spine development;ephrin receptor signaling pathway;epidermal growth factor receptor signaling pathway;immunological synapse formation;lamellipodium assembly;negative regulation of cell proliferation;negative regulation of endoplasmic reticulum stress-induced eIF2 alpha phosphorylation;negative regulation of peptidyl-serine phosphorylation;nega…	cytoskeletal adaptor activity;phosphotyrosine residue binding;protein complex binding;receptor signaling complex scaffold activity;scaffold protein binding;SH3/SH2 adaptor activity	cytoplasm;cytosol;endoplasmic reticulum;postsynaptic density;vesicle membrane	Axon guidance;ErbB signaling pathway;Pathogenic Escherichia coli infection;T cell receptor signaling pathway			4	3	3	18.9	16.8	16.8	42.915	0	5.9047	15795000	3	0.305525	1	5.80388	0.750199	sp|O43639|NCK2_HUMAN	sp|O43639|NCK2_HUMAN	436	O43639	NCK2_HUMAN	Cytoplasmic protein NCK2		NCK2
20.8794	18.3258	1	20.8192	1	1				histone H3 acetylation;negative regulation of transcription from RNA polymerase II promoter;transcription, DNA-templated	DNA binding;protein heterodimerization activity;TBP-class protein binding;transcription corepressor activity;transcription factor binding	Ada2/Gcn5/Ada3 transcription activator complex;nucleus				3	3	3	29	29	29	19.443	0	21.482	45038000	2	0.253012	1	5.79536	0.637513	sp|Q01658|NC2B_HUMAN	sp|Q01658|NC2B_HUMAN	2143	Q01658	NC2B_HUMAN	Protein Dr1		DR1
18.613	17.2827	18.119	18.7135	17.032	1				tRNA (guanine-N7)-methylation;tRNA modification		cytosol;nucleoplasm;nucleus;tRNA methyltransferase complex				1	1	1	2.7	2.7	2.7	45.489	0.0048498	2.5432	37119000	3	0.435885	1	5.75642	1.01731	sp|P57081|WDR4_HUMAN	sp|P57081|WDR4_HUMAN	1875	P57081	WDR4_HUMAN	tRNA (guanine-N(7)-)-methyltransferase non-catalytic subunit WDR4 {ECO:0000255|HAMAP-Rule:MF_03056}		WDR4
20.4106	17.9846	18.6131	19.8191	18.9632	1										6	4	4	58.6	39.8	39.8	14.277	0	13.683	64860000	8	0.392227	1	5.74201	0.929387	tr|E9PLP0|E9PLP0_HUMAN;tr|C9JLN0|C9JLN0_HUMAN	tr|E9PLP0|E9PLP0_HUMAN	5519	E9PLP0	E9PLP0_HUMAN			CARS
18.0612	1	17.4691	1	1	17.3707				protein import into mitochondrial inner membrane		integral component of membrane;mitochondrial inner membrane;mitochondrial inner membrane protein insertion complex;mitochondrial intermembrane space				2	2	2	14.2	14.2	14.2	29.233	0.00081549	3.8829	24049000	2	0.29699	1	5.71988	0.732134	sp|Q9BSF4|CS052_HUMAN	sp|Q9BSF4|CS052_HUMAN	4182	Q9BSF4	TIM29_HUMAN	Mitochondrial import inner membrane translocase subunit Tim29 {ECO:0000303|PubMed:27554484}	IM29 {ECO:0000303|PubMed:27554484}	TIMM29
17.5599	1	18.616	18.0186	1	1					calcium-activated potassium channel activity;potassium channel activity	integral component of membrane;nuclear membrane;nucleus;sarcoplasmic reticulum membrane				2	2	2	8.2	8.2	8.2	32.509	0.00041745	4.3453	18380000	2	0.287017	1	5.71912	0.71091	sp|Q9NVV0|TM38B_HUMAN;tr|A0A0A0MRS4|A0A0A0MRS4_HUMAN	sp|Q9NVV0|TM38B_HUMAN;tr|A0A0A0MRS4|A0A0A0MRS4_HUMAN	4777	Q9NVV0	TM38B_HUMAN	Trimeric intracellular cation channel type B	RICB;RIC-B	TMEM38B
17.8778	1	18.493	1	1	18.2412				peroxisome membrane biogenesis;peroxisome organization;protein import into peroxisome membrane;transmembrane transport	lipid binding;protein dimerization activity	cytosol;endoplasmic reticulum;integral component of peroxisomal membrane;membrane;nucleoplasm;peroxisomal membrane;peroxisome;protein complex;protein-lipid complex	Peroxisome			1	1	1	2.7	2.7	2.7	42.139	0.0019268	3.0615	40493000	4	0.283549	1	5.70988	0.703501	sp|P56589|PEX3_HUMAN	sp|P56589|PEX3_HUMAN	1870	P56589	PEX3_HUMAN	Peroxisomal biogenesis factor 3		PEX3
18.5724	1	19.0941	1	1	19.605										1	1	1	42.6	42.6	42.6	7.0578	0	10.807	5570900	2	0.264237	1	5.68717	0.661928	tr|K7ENN3|K7ENN3_HUMAN;tr|K7EN61|K7EN61_HUMAN;tr|K7EIZ9|K7EIZ9_HUMAN;sp|Q92624|APBP2_HUMAN	tr|K7ENN3|K7ENN3_HUMAN;tr|K7EN61|K7EN61_HUMAN;tr|K7EIZ9|K7EIZ9_HUMAN;sp|Q92624|APBP2_HUMAN	3697	K7ENN3	K7ENN3_HUMAN			APPBP2
18.0662	16.9418	17.9174	17.854	17.0206	1						cytosol;mitochondrion				2	2	2	8.9	8.9	8.9	31.932	0.00041771	4.3555	19613000	3	0.444333	1	5.6836	1.03419	tr|H0YBZ4|H0YBZ4_HUMAN;sp|Q15390|MTFR1_HUMAN	tr|H0YBZ4|H0YBZ4_HUMAN;sp|Q15390|MTFR1_HUMAN	2593	H0YBZ4	H0YBZ4_HUMAN			MTFR1
18.1426	17.0002	17.6144	1	16.8467	17.9126				post-translational protein modification;protein polyubiquitination;ubiquitin-dependent protein catabolic process	ubiquitin-protein transferase activity	cytosol;ubiquitin ligase complex				1	1	1	4.9	4.9	4.9	37.026	0.0012012	3.5778	29744000	3	0.444345	1	5.66593	1.03421	sp|Q9NXK8|FXL12_HUMAN	sp|Q9NXK8|FXL12_HUMAN	4831	Q9NXK8	FXL12_HUMAN	F-box/LRR-repeat protein 12		FBXL12
17.8532	17.3052	15.7927	1	17.4527	15.5022				muscle cell differentiation;negative regulation of T cell proliferation;neural tube closure;positive regulation of cytokine secretion;positive regulation of interleukin-2 biosynthetic process;positive regulation of phosphorylation;regulation of gene expression, epigenetic;regulation of proteasomal ubiquitin-dependent protein catabolic process;vasculogenesis	hepatocyte growth factor receptor binding;ubiquitin protein ligase binding;ubiquitin-protein transferase inhibitor activity	Cul2-RING ubiquitin ligase complex;Cul3-RING ubiquitin ligase complex;Cul4A-RING E3 ubiquitin ligase complex;cullin-RING ubiquitin ligase complex;cytoplasm;intracellular				5	5	5	10.9	10.9	10.9	68.207	0	11.835	43184000	6	0.46939	1	5.66541	1.08404	sp|Q92990|GLMN_HUMAN;tr|M0QXG8|M0QXG8_HUMAN;tr|M0QX84|M0QX84_HUMAN	sp|Q92990|GLMN_HUMAN;tr|M0QXG8|M0QXG8_HUMAN	3747	Q92990	GLMN_HUMAN	Glomulin		GLMN
18.371	17.2426	16.6073	17.6862	16.5585	1					RNA binding	nuclear body;nucleoplasm				2	2	2	6.8	6.8	6.8	48.848	0	24.065	25753000	8	0.450381	1	5.65874	1.04625	tr|H7BXE3|H7BXE3_HUMAN;sp|Q9NWH9|SLTM_HUMAN;tr|H0YLW7|H0YLW7_HUMAN;tr|H0YMW8|H0YMW8_HUMAN;tr|H0YNF3|H0YNF3_HUMAN;tr|H0YMR6|H0YMR6_HUMAN;tr|H0YLE6|H0YLE6_HUMAN;tr|H0YL55|H0YL55_HUMAN;tr|H7C3F4|H7C3F4_HUMAN	tr|H7BXE3|H7BXE3_HUMAN;sp|Q9NWH9|SLTM_HUMAN;tr|H0YLW7|H0YLW7_HUMAN;tr|H0YMW8|H0YMW8_HUMAN;tr|H0YNF3|H0YNF3_HUMAN;tr|H0YMR6|H0YMR6_HUMAN;tr|H0YLE6|H0YLE6_HUMAN;tr|H0YL55|H0YL55_HUMAN;tr|H7C3F4|H7C3F4_HUMAN	4789	H7BXE3	H7BXE3_HUMAN			SLTM
17.0951	15.147	16.6424	1	14.8534	16.1046				endocytosis;endosome to lysosome transport;endosome transport via multivesicular body sorting pathway;extrinsic apoptotic signaling pathway via death domain receptors;glucose import;Golgi to endosome transport;G-protein coupled receptor signaling pathway;multicellular organism development;myotube differentiation;negative regulation of fat cell differentiation;negative regulation of lipoprotein li…	enzyme binding;nerve growth factor binding;nerve growth factor receptor activity;neurotensin receptor activity, non-G-protein coupled	cell surface;clathrin-coated pit;clathrin-coated vesicle;cytoplasmic vesicle;cytoplasmic vesicle membrane;cytosol;dendrite;early endosome;endoplasmic reticulum membrane;endosome membrane;Golgi apparatus;Golgi cisterna membrane;integral component of membrane;lysosomal membrane;neuronal cell body;nuclear membrane;perinuclear region of cytoplasm;plasma membrane;trans-Golgi network transport vesicle	Cholesterol metabolism;Lysosome;Neurotrophin signaling pathway			2	2	2	3.5	3.5	3.5	92.067	0	7.1194	33541000	5	0.506444	1	5.64216	1.15725	sp|Q99523|SORT_HUMAN;tr|A0A0J9YVX1|A0A0J9YVX1_HUMAN;tr|A0A0J9YX61|A0A0J9YX61_HUMAN	sp|Q99523|SORT_HUMAN;tr|A0A0J9YVX1|A0A0J9YVX1_HUMAN;tr|A0A0J9YX61|A0A0J9YX61_HUMAN	4071	Q99523	SORT_HUMAN	Sortilin		SORT1
17.4183	15.5465	17.1355	1	15.0279	17.1533				intracellular protein transport;protein folding	unfolded protein binding	endoplasmic reticulum;endoplasmic reticulum lumen;extracellular space	Protein processing in endoplasmic reticulum			2	2	2	5.6	5.6	5.6	52.084	0.00041468	4.2045	16388000	3	0.480292	1	5.63968	1.10563	sp|Q9H173|SIL1_HUMAN;tr|D6REA1|D6REA1_HUMAN	sp|Q9H173|SIL1_HUMAN;tr|D6REA1|D6REA1_HUMAN	4408	Q9H173	SIL1_HUMAN	Nucleotide exchange factor SIL1		SIL1
18.054	1	17.7414	1	1	17.9026				regulation of GTPase activity;signal transduction						7	5	5	7.2	6.1	6.1	160.33	0	8.5047	169810000	14	0.285071	1	5.63094	0.706755	tr|E7EWC2|E7EWC2_HUMAN;tr|F5H7S7|F5H7S7_HUMAN;sp|Q13576|IQGA2_HUMAN	tr|E7EWC2|E7EWC2_HUMAN;tr|F5H7S7|F5H7S7_HUMAN;sp|Q13576|IQGA2_HUMAN	2385	E7EWC2	E7EWC2_HUMAN			IQGAP2
16.9281	17.6452	1	1	16.6873	1				adult locomotory behavior;behavioral fear response;cardiolipin metabolic process;catecholamine secretion;cellular biogenic amine metabolic process;cerebellum development;chromatin silencing;dendrite development;excitatory postsynaptic potential;glucocorticoid metabolic process;glutamine metabolic process;histone acetylation;histone methylation;inositol metabolic process;locomotory behavior;long-t…	chromatin binding;DNA binding;double-stranded methylated DNA binding;methyl-CpG binding;mRNA binding;protein domain specific binding;protein N-terminus binding;RNA binding;siRNA binding;transcription corepressor activity;transcription factor binding;transcriptional repressor activity, RNA polymerase II proximal promoter sequence-specific DNA binding	cytosol;extracellular space;heterochromatin;mitochondrion;nucleus;postsynapse				7	7	4	20.2	20.2	11.9	52.44	0	16.222	79060000	12	0.303754	1	5.62867	0.746458	sp|P51608|MECP2_HUMAN;tr|A0A087WXF0|A0A087WXF0_HUMAN;tr|A0A087X1U4|A0A087X1U4_HUMAN;tr|A0A087WVW7|A0A087WVW7_HUMAN;tr|A0A0D9SFX7|A0A0D9SFX7_HUMAN;tr|A0A0D9SEX1|A0A0D9SEX1_HUMAN;tr|C9JH89|C9JH89_HUMAN	sp|P51608|MECP2_HUMAN;tr|A0A087WXF0|A0A087WXF0_HUMAN;tr|A0A087X1U4|A0A087X1U4_HUMAN;tr|A0A087WVW7|A0A087WVW7_HUMAN	1743	P51608	MECP2_HUMAN	Methyl-CpG-binding protein 2	eCp2;eCp-2 protein	MECP2
17.1861	16.1765	17.6323	1	15.6021	17.5126				ion transport;transport	inorganic phosphate transmembrane transporter activity;receptor activity;sodium:inorganic phosphate symporter activity;sodium:phosphate symporter activity;sodium-dependent phosphate transmembrane transporter activity;virus receptor activity	extracellular exosome;integral component of plasma membrane;membrane;plasma membrane				2	2	2	6.1	6.1	6.1	70.392	0.00041999	4.4759	15064000	3	0.464982	1	5.62673	1.07529	sp|Q08357|S20A2_HUMAN	sp|Q08357|S20A2_HUMAN	2229	Q08357	S20A2_HUMAN	Sodium-dependent phosphate transporter 2		SLC20A2
19.7532	18.6742	17.0401	18.938	18.6782	1				cell cycle;mRNA methylation;mRNA processing;regulation of alternative mRNA splicing, via spliceosome;RNA metabolic process;RNA splicing		nuclear membrane;nuclear speck;nucleoplasm;nucleus;RNA N6-methyladenosine methyltransferase complex				5	5	5	17.7	17.7	17.7	44.243	0	53.473	146380000	15	0.396456	1	5.61712	0.937959	sp|Q15007|FL2D_HUMAN;tr|A0A087X1R4|A0A087X1R4_HUMAN	sp|Q15007|FL2D_HUMAN	2533	Q15007	FL2D_HUMAN	Pre-mRNA-splicing regulator WTAP		WTAP
17.0987	1	16.1247	1	1	15.4088				axon guidance;insulin receptor signaling pathway;MAPK cascade	protein tyrosine phosphatase activity;Ras guanyl-nucleotide exchange factor activity;transmembrane receptor protein tyrosine phosphatase activity	extracellular exosome;integral component of plasma membrane;intracellular;plasma membrane;receptor complex				4	4	4	8.4	8.4	8.4	90.599	0	11.641	14524000	3	0.324879	1	5.60486	0.790846	sp|P18433|PTPRA_HUMAN	sp|P18433|PTPRA_HUMAN	1177	P18433	PTPRA_HUMAN	Receptor-type tyrosine-protein phosphatase alpha	#NAME?	PTPRA
20.1935	16.8837	1	19.2807	1	1						cytosol				2	2	2	22	22	22	21.556	0	14.224	44104000	4	0.2628	1	5.59885	0.658814	tr|H0YNN4|H0YNN4_HUMAN;tr|H0YNB7|H0YNB7_HUMAN;tr|H0YL22|H0YL22_HUMAN;sp|Q9Y375|CIA30_HUMAN	tr|H0YNN4|H0YNN4_HUMAN;tr|H0YNB7|H0YNB7_HUMAN;tr|H0YL22|H0YL22_HUMAN;sp|Q9Y375|CIA30_HUMAN	5270	H0YNN4	H0YNN4_HUMAN			NDUFAF1
19.7544	19.2607	18.209	20.2977	19.1378	1				cell-cell signaling;transmembrane receptor protein tyrosine kinase signaling pathway	structural molecule activity	cell surface;focal adhesion;integral component of plasma membrane	Cell adhesion molecules (CAMs)			5	5	5	18.2	18.2	18.2	29.082	0	11.521	73140000	10	0.374483	1	5.59618	0.89327	sp|O95297|MPZL1_HUMAN;tr|Q9UEL6|Q9UEL6_HUMAN	sp|O95297|MPZL1_HUMAN	737	O95297	MPZL1_HUMAN	Myelin protein zero-like protein 1		MPZL1
21.3836	13.3263	19.1575	1	17.677	18.435				adaptive immune response;antigen processing and presentation;antigen processing and presentation of exogenous peptide antigen via MHC class II;cellular response to thyroid hormone stimulus;collagen catabolic process;extracellular matrix disassembly;macrophage apoptotic process;proteolysis;proteolysis involved in cellular protein catabolic process;regulation of keratinocyte differentiation;toll-li…	collagen binding;cysteine-type endopeptidase activity;cysteine-type peptidase activity;fibronectin binding;histone binding;proteoglycan binding;serine-type endopeptidase activity;serpin family protein binding	endolysosome lumen;extracellular exosome;extracellular region;extracellular space;lysosomal lumen;lysosome;nucleus	Antigen processing and presentation;Apoptosis;Autophagy - animal;Fluid shear stress and atherosclerosis;Lysosome;Phagosome;Proteoglycans in cancer;Rheumatoid arthritis			3	3	3	13.2	13.2	13.2	37.564	0	10.185	56149000	2	0.379909	1	5.58513	0.90434	sp|P07711|CATL1_HUMAN;sp|Q5NE16|CATL3_HUMAN;tr|Q5T8F0|Q5T8F0_HUMAN;tr|Q5QP40|Q5QP40_HUMAN;sp|P43235|CATK_HUMAN;sp|O60911|CATL2_HUMAN	sp|P07711|CATL1_HUMAN	940	P07711	CATL1_HUMAN	Cathepsin L1		CTSL
1	17.9261	17.7678	1	17.9714	1				RNA methylation	methyltransferase activity					4	4	4	21.7	21.7	21.7	16.93	0	9.4575	63344000	7	0.28158	1	5.57419	0.699286	tr|E9PGN6|E9PGN6_HUMAN;sp|Q9UI43|MRM2_HUMAN	tr|E9PGN6|E9PGN6_HUMAN;sp|Q9UI43|MRM2_HUMAN	5046	E9PGN6	E9PGN6_HUMAN			MRM2
17.3043	1	17.2806	16.8682	1	1					ATP binding;metal ion binding;sodium:potassium-exchanging ATPase activity	integral component of membrane				17	3	1	22.7	4.5	1.6	108.28	0	5.9571	34698000	4	0.298352	1	5.57222	0.735024	tr|M0R116|M0R116_HUMAN;sp|P13637|AT1A3_HUMAN;tr|A0A0A0MT26|A0A0A0MT26_HUMAN;sp|Q13733|AT1A4_HUMAN	tr|M0R116|M0R116_HUMAN;sp|P13637|AT1A3_HUMAN;tr|A0A0A0MT26|A0A0A0MT26_HUMAN	1081	M0R116	M0R116_HUMAN	Sodium/potassium-transporting ATPase subunit alpha {ECO:0000256|RuleBase:RU362084}		ATP1A3
19.4885	15.9943	17.6236	18.9732	1	16.4172				astrocyte development;cell cycle arrest;cell dedifferentiation;cell division;cellular response to phorbol 13-acetate 12-myristate;dentate gyrus development;G1/S transition of mitotic cell cycle;generation of neurons;gliogenesis;lateral ventricle development;negative regulation of cell cycle;negative regulation of cell differentiation;negative regulation of cell proliferation;negative regulation o…	ATP binding;cyclin binding;cyclin-dependent protein serine/threonine kinase activity;FBXO family protein binding	centrosome;cyclin-dependent protein kinase holoenzyme complex;cytoplasm;cytosol;nucleoplasm;nucleus;ruffle	Breast cancer;Cell cycle;Cellular senescence;Chronic myeloid leukemia;Cushing syndrome;Epstein-Barr virus infection;Glioma;Hepatitis C;Hepatocellular carcinoma;Human cytomegalovirus infection;Human papillomavirus infection;Influenza A;Kaposi sarcoma-associated herpesvirus infection;Measles;Melanoma;MicroRNAs in cancer;Non-small cell lung cancer;p53 signaling pathway;Pancreatic cancer;Pathways in …			4	3	3	17.2	14.7	14.7	36.938	0	11.477	33896000	6	0.41574	1	5.57199	0.976891	sp|Q00534|CDK6_HUMAN	sp|Q00534|CDK6_HUMAN	2117	Q00534	CDK6_HUMAN	Cyclin-dependent kinase 6		CDK6
19.6784	17.9829	17.1621	19.6298	17.4787	1				mRNA cis splicing, via spliceosome;mRNA splicing, via spliceosome	nucleic acid binding;proline-rich region binding;zinc ion binding	nuclear speck;nucleoplasm;spliceosomal complex				2	2	2	7.4	7.4	7.4	42.506	0.0004215	4.5826	48280000	2	0.397194	1	5.57165	0.939454	sp|O75554|WBP4_HUMAN	sp|O75554|WBP4_HUMAN	607	O75554	WBP4_HUMAN	WW domain-binding protein 4	BP-4	WBP4
16.4356	16.7625	14.4907	1	15.4777	14.5232				mannose metabolic process	alpha-mannosidase activity;carbohydrate binding;metal ion binding					2	2	2	3.1	3.1	3.1	107.51	0	5.7328	14376000	3	0.516191	1	5.56263	1.17643	tr|H0YA68|H0YA68_HUMAN;tr|E9PCD7|E9PCD7_HUMAN;sp|Q9Y2E5|MA2B2_HUMAN	tr|H0YA68|H0YA68_HUMAN;tr|E9PCD7|E9PCD7_HUMAN;sp|Q9Y2E5|MA2B2_HUMAN	5220	H0YA68	H0YA68_HUMAN	Alpha-mannosidase {ECO:0000256|RuleBase:RU361199}		MAN2B2
17.1677	18.4433	18.2178	18.2325	1	17.9302				cleavage furrow formation;endocytosis;endosomal transport;mitotic cytokinesis;positive regulation of GTPase activity;protein transport	phosphatidylinositol-4,5-bisphosphate binding	cytoplasmic vesicle;cytoplasmic vesicle membrane;endosome membrane;extracellular exosome;extrinsic component of cytoplasmic side of plasma membrane				8	8	8	19.1	19.1	19.1	68.894	0	52.782	298940000	36	0.413936	1	5.55537	0.973259	sp|Q96RF0|SNX18_HUMAN	sp|Q96RF0|SNX18_HUMAN	4016	Q96RF0	SNX18_HUMAN	Sorting nexin-18		SNX18
18.5795	17.476	16.6569	17.6417	17.4418	1				basement membrane organization;cell adhesion;establishment of epithelial cell polarity;keratinocyte migration;keratinocyte proliferation;negative regulation of canonical Wnt signaling pathway;negative regulation of catenin import into nucleus;negative regulation of gene expression;negative regulation of stem cell proliferation;negative regulation of timing of anagen;positive regulation of cell ad…		cell junction;cytosol;filamentous actin;focal adhesion;ruffle membrane				6	5	5	12	10.5	10.5	77.436	0	11.063	64548000	5	0.427302	1	5.54294	1.00012	sp|Q9BQL6|FERM1_HUMAN;tr|G3V1L6|G3V1L6_HUMAN	sp|Q9BQL6|FERM1_HUMAN;tr|G3V1L6|G3V1L6_HUMAN	4152	Q9BQL6	FERM1_HUMAN	Fermitin family homolog 1		FERMT1
17.3375	17.3283	1	1	17.0391	1				mitochondrial ornithine transport;mitochondrial transport;urea cycle	L-ornithine transmembrane transporter activity	integral component of membrane;mitochondrial inner membrane				2	2	2	9.3	9.3	9.3	32.736	0.0010085	3.6843	14852000	2	0.294256	1	5.54223	0.726331	sp|Q9Y619|ORNT1_HUMAN;tr|Q5VZD9|Q5VZD9_HUMAN	sp|Q9Y619|ORNT1_HUMAN;tr|Q5VZD9|Q5VZD9_HUMAN	5385	Q9Y619	ORNT1_HUMAN	Mitochondrial ornithine transporter 1		SLC25A15
18.2177	17.6584	17.2458	18.3051	17.2056	1				lysosome localization		BORC complex;lysosomal membrane				3	3	3	13.7	13.7	13.7	37.226	0	7.8868	25219000	5	0.421536	1	5.53705	0.988544	sp|Q96GS4|CQ059_HUMAN	sp|Q96GS4|CQ059_HUMAN	3902	Q96GS4	BORC6_HUMAN	BLOC-1-related complex subunit 6 {ECO:0000305}		BORCS6
18.3235	13.0701	17.3591	1	13.1618	18.0073				cerebellum morphogenesis;ether lipid biosynthetic process;membrane organization;paranodal junction assembly;phosphatidic acid biosynthetic process;response to drug;response to fatty acid;response to nutrient;response to starvation;synapse assembly	glycerone-phosphate O-acyltransferase activity;palmitoyl-CoA hydrolase activity;receptor binding	membrane;mitochondrion;peroxisomal matrix;peroxisomal membrane;peroxisome	Glycerophospholipid metabolism;Peroxisome			4	4	4	9.3	9.3	9.3	77.187	0	27.442	44047000	8	0.447748	1	5.52788	1.041	sp|O15228|GNPAT_HUMAN;tr|Q5TBH8|Q5TBH8_HUMAN;tr|Q5TBH6|Q5TBH6_HUMAN	sp|O15228|GNPAT_HUMAN;tr|Q5TBH8|Q5TBH8_HUMAN;tr|Q5TBH6|Q5TBH6_HUMAN	348	O15228	GNPAT_HUMAN	Dihydroxyacetone phosphate acyltransferase	AP-AT;HAP-AT	GNPAT
1	18.0577	16.5875	1	17.0857	1				lysine catabolic process;negative regulation of transcription from RNA polymerase II promoter;sensory perception of sound;thyroid hormone metabolic process;thyroid hormone transport	NADP binding;oxidoreductase activity, acting on the CH-NH2 group of donors, NAD or NADP as acceptor;protein homodimerization activity;thiomorpholine-carboxylate dehydrogenase activity;thyroid hormone binding;transcription corepressor activity	cytoplasm;cytosol;extracellular exosome;mitochondrion;nucleus;peroxisomal matrix				3	3	3	11.8	11.8	11.8	33.775	0	7.4516	27789000	4	0.291978	1	5.51986	0.721486	sp|Q14894|CRYM_HUMAN;tr|I3NI53|I3NI53_HUMAN;tr|I3L2W5|I3L2W5_HUMAN;tr|I3L325|I3L325_HUMAN;tr|I3L3J9|I3L3J9_HUMAN;tr|I3L3Y1|I3L3Y1_HUMAN	sp|Q14894|CRYM_HUMAN;tr|I3NI53|I3NI53_HUMAN;tr|I3L2W5|I3L2W5_HUMAN;tr|I3L325|I3L325_HUMAN	2513	Q14894	CRYM_HUMAN	Ketimine reductase mu-crystallin		CRYM
17.2165	13.6624	1	1	13.3796	1					metallocarboxypeptidase activity;zinc ion binding					3	3	3	13.9	13.9	13.9	35.634	0	5.6214	5043400	3	0.356468	1	5.49975	0.856337	tr|B7Z5J4|B7Z5J4_HUMAN;sp|Q9UI42|CBPA4_HUMAN	tr|B7Z5J4|B7Z5J4_HUMAN;sp|Q9UI42|CBPA4_HUMAN	5045	B7Z5J4	B7Z5J4_HUMAN			CPA4
17.6445	13.0002	17.4764	1	12.5407	18.0828					potassium:chloride symporter activity	integral component of membrane				3	3	3	3.7	3.7	3.7	115.05	0	5.6365	33140000	7	0.45034	1	5.4992	1.04617	tr|I3L4N6|I3L4N6_HUMAN;sp|Q9UP95|S12A4_HUMAN;tr|H0YMQ9|H0YMQ9_HUMAN;tr|H0YKQ8|H0YKQ8_HUMAN;tr|B3KXX3|B3KXX3_HUMAN;sp|Q9UHW9|S12A6_HUMAN	tr|I3L4N6|I3L4N6_HUMAN;sp|Q9UP95|S12A4_HUMAN	5170	I3L4N6	I3L4N6_HUMAN			SLC12A4
1	13.924	18.2937	1	14.7291	1					transcription cofactor activity	fibrillar center;SAGA complex				7	7	7	14.4	14.4	14.4	80.343	0	19.076	142370000	23	0.326458	1	5.49618	0.794144	tr|F6S7C4|F6S7C4_HUMAN;sp|Q8NEM7|SP20H_HUMAN;tr|B4E2D5|B4E2D5_HUMAN;tr|R4GND2|R4GND2_HUMAN;tr|H7C5F9|H7C5F9_HUMAN;tr|C9JQS2|C9JQS2_HUMAN	tr|F6S7C4|F6S7C4_HUMAN;sp|Q8NEM7|SP20H_HUMAN;tr|B4E2D5|B4E2D5_HUMAN;tr|R4GND2|R4GND2_HUMAN;tr|H7C5F9|H7C5F9_HUMAN	3492	F6S7C4	F6S7C4_HUMAN			SUPT20H
16.8664	1	17.0085	16.3907	1	1				bile acid and bile salt transport;camera-type eye development;cardiac muscle cell proliferation;cholesterol metabolic process;embryo implantation;in utero embryonic development;maternal placenta development;modulation by virus of host morphology or physiology;negative regulation of transcription from RNA polymerase II promoter;peroxisome proliferator activated receptor signaling pathway;positive …	9-cis retinoic acid receptor activity;chromatin DNA binding;DBD domain binding;DNA binding;DNA binding transcription factor activity;double-stranded DNA binding;enzyme binding;LBD domain binding;ligand-dependent nuclear receptor binding;nuclear receptor activity;peptide binding;protein heterodimerization activity;retinoic acid binding;retinoic acid receptor activity;retinoic acid-responsive eleme…	nuclear chromatin;nucleoplasm;nucleus;protein complex;receptor complex;RNA polymerase II transcription factor complex	Adipocytokine signaling pathway;Bile secretion;Gastric cancer;Hepatitis C;Non-alcoholic fatty liver disease (NAFLD);Non-small cell lung cancer;Parathyroid hormone synthesis, secretion and action;Pathways in cancer;PI3K-Akt signaling pathway;PPAR signaling pathway;Small cell lung cancer;Th17 cell differentiation;Thyroid cancer;Thyroid hormone signaling pathway;Transcriptional misregulation in canc…			2	1	1	6.7	4.5	4.5	50.811	0.0011851	3.3773	14543000	3	0.302592	1	5.49474	0.744003	sp|P19793|RXRA_HUMAN	sp|P19793|RXRA_HUMAN	1199	P19793	RXRA_HUMAN	Retinoic acid receptor RXR-alpha		RXRA
16.1201	1	16.5511	15.2001	1	1				cell cycle;chromosome segregation;double-strand break repair;hematopoietic progenitor cell differentiation;post-translational protein acetylation;protein localization to chromatin;regulation of DNA replication	lysine N-acetyltransferase activity, acting on acetyl phosphate as donor;metal ion binding;N-acetyltransferase activity	cell junction;chromatin;chromocenter;Golgi apparatus;nuclear pericentric heterochromatin;nucleoplasm;nucleus;site of double-strand break;XY body				3	3	1	7.3	7.3	2.5	68.306	0	8.3659	24007000	5	0.323496	1	5.49038	0.787956	sp|Q56NI9|ESCO2_HUMAN;tr|E5RFE4|E5RFE4_HUMAN	sp|Q56NI9|ESCO2_HUMAN	2794	Q56NI9	ESCO2_HUMAN	N-acetyltransferase ESCO2		ESCO2
16.8243	15.7027	17.6178	1	15.0386	17.6357				cell morphogenesis involved in neuron differentiation;negative regulation of cytoplasmic translation;neuron migration	metal ion binding;mRNA CDS binding;RNA binding	cytoplasm;polysome				3	3	3	5.3	5.3	5.3	88.084	0.0057322	2.4118	32501000	2	0.455501	1	5.49015	1.05644	sp|Q9C0B0|UNK_HUMAN;tr|A0A0A0MRZ1|A0A0A0MRZ1_HUMAN;tr|E9PDK2|E9PDK2_HUMAN	sp|Q9C0B0|UNK_HUMAN	4346	Q9C0B0	UNK_HUMAN	RING finger protein unkempt homolog		UNK
15.9089	21.0698	21.0693	19.8223	20.7652	1				positive regulation of transcription from RNA polymerase II promoter;transcription, DNA-templated	protein dimerization activity;RNA polymerase II regulatory region sequence-specific DNA binding	nucleus				1	1	1	12.9	12.9	12.9	10.058	0.00061678	4.0776	59128000	4	0.340565	1	5.48684	0.823491	tr|H0YM62|H0YM62_HUMAN;tr|D6RG14|D6RG14_HUMAN;tr|D6RB91|D6RB91_HUMAN;tr|D6RG21|D6RG21_HUMAN;tr|D6RCM6|D6RCM6_HUMAN;tr|Q05BX2|Q05BX2_HUMAN;tr|D6RJA7|D6RJA7_HUMAN;tr|A0A0D9SET2|A0A0D9SET2_HUMAN;tr|D6R942|D6R942_HUMAN;tr|D6RC63|D6RC63_HUMAN;tr|D8L7E9|D8L7E9_HUMAN;tr|D6RJG6|D6RJG6_HUMAN;tr|A0A0D9SFD0|A0A0D9SFD0_HUMAN;tr|A0A0D9SGI5|A0A0D9SGI5_HUMAN;sp|Q06413|MEF2C_HUMAN;sp|Q02078|MEF2A_HUMAN;sp|Q14814…	tr|H0YM62|H0YM62_HUMAN;tr|D6RG14|D6RG14_HUMAN;tr|D6RB91|D6RB91_HUMAN;tr|D6RG21|D6RG21_HUMAN;tr|D6RCM6|D6RCM6_HUMAN;tr|Q05BX2|Q05BX2_HUMAN;tr|D6RJA7|D6RJA7_HUMAN;tr|A0A0D9SET2|A0A0D9SET2_HUMAN;tr|D6R942|D6R942_HUMAN;tr|D6RC63|D6RC63_HUMAN;tr|D8L7E9|D8L7E9_HUMAN;tr|D6RJG6|D6RJG6_HUMAN;tr|A0A0D9SFD0|A0A0D9SFD0_HUMAN;tr|A0A0D9SGI5|A0A0D9SGI5_HUMAN;sp|Q06413|MEF2C_HUMAN;sp|Q02078|MEF2A_HUMAN;sp|Q14814…	2151	H0YM62	H0YM62_HUMAN			MEF2A
18.2447	15.4789	16.5365	17.3892	15.4455	1						integral component of membrane				2	2	2	5.9	5.9	5.9	50.552	0.0011825	3.345	18670000	0	0.450487	1	5.47514	1.04646	tr|K7EPA3|K7EPA3_HUMAN;sp|Q9NX61|T161A_HUMAN;tr|K7EQ34|K7EQ34_HUMAN;tr|U3KQT6|U3KQT6_HUMAN	tr|K7EPA3|K7EPA3_HUMAN;sp|Q9NX61|T161A_HUMAN;tr|K7EQ34|K7EQ34_HUMAN;tr|U3KQT6|U3KQT6_HUMAN	4816	K7EPA3	K7EPA3_HUMAN			TMEM161A
18.0313	17.2194	1	17.8507	1	1				ribosomal large subunit biogenesis;ribosome assembly	RNA binding	cytosol;nucleolus;nucleus;preribosome, large subunit precursor				3	3	3	21.7	21.7	21.7	20.462	0	6.3596	13966000	1	0.278418	1	5.46666	0.692506	sp|Q9Y221|NIP7_HUMAN;tr|J3QRD6|J3QRD6_HUMAN;tr|J3QRR4|J3QRR4_HUMAN;tr|J3QLW7|J3QLW7_HUMAN	sp|Q9Y221|NIP7_HUMAN;tr|J3QRD6|J3QRD6_HUMAN;tr|J3QRR4|J3QRR4_HUMAN;tr|J3QLW7|J3QLW7_HUMAN	5194	Q9Y221	NIP7_HUMAN	60S ribosome subunit biogenesis protein NIP7 homolog		NIP7
16.9866	15.552	1	1	15.1967	1				CDP-diacylglycerol biosynthetic process	glycerol-3-phosphate O-acyltransferase activity;sn-1-glycerol-3-phosphate C16:0-DCA-CoA acyl transferase activity	mitochondrial outer membrane;plasma membrane				14	14	14	34.1	34.1	34.1	80.139	0	44.484	151790000	34	0.32085	1	5.4473	0.782419	tr|Q5VW52|Q5VW52_HUMAN;sp|Q9HCL2|GPAT1_HUMAN	tr|Q5VW52|Q5VW52_HUMAN;sp|Q9HCL2|GPAT1_HUMAN	4598	Q5VW52	Q5VW52_HUMAN	Glycerol-3-phosphate acyltransferase 1, mitochondrial {ECO:0000256|PIRNR:PIRNR000437}
16.7055	1	17.0454	1	1	16.4109				mitochondrial tRNA thio-modification;tRNA wobble position uridine thiolation	ATP binding;sulfurtransferase activity;tRNA binding	mitochondrion;nucleoplasm				4	4	4	9.7	9.7	9.7	47.744	0	8.756	17812000	3	0.299973	1	5.44667	0.73846	sp|O75648|MTU1_HUMAN	sp|O75648|MTU1_HUMAN	618	O75648	MTU1_HUMAN	Mitochondrial tRNA-specific 2-thiouridylase 1		TRMU
16.9065	14.8513	16.8617	17.0178	14.2648	1				acetyl-CoA biosynthetic process;acyl-CoA metabolic process;fatty acid biosynthetic process;fatty acid oxidation;malonyl-CoA catabolic process;positive regulation of fatty acid oxidation;regulation of fatty acid beta-oxidation;regulation of glucose metabolic process;response to ischemia	identical protein binding;malonyl-CoA decarboxylase activity;receptor binding	cytoplasm;cytosol;mitochondrial matrix;mitochondrion;peroxisomal matrix;peroxisome	AMPK signaling pathway;beta-Alanine metabolism;Metabolic pathways;Peroxisome;Propanoate metabolism			3	3	3	8.7	8.7	8.7	55.003	0.0004158	4.2653	16110000	4	0.472954	1	5.44562	1.0911	sp|O95822|DCMC_HUMAN	sp|O95822|DCMC_HUMAN	797	O95822	DCMC_HUMAN	Malonyl-CoA decarboxylase, mitochondrial	CD	MLYCD
17.2954	15.9235	17.7126	1	16.3075	17.2914				androgen metabolic process;B cell receptor signaling pathway;cellular response to hydrogen peroxide;establishment of protein localization;estrogen metabolic process;face morphogenesis;Leydig cell differentiation;luteinization;multicellular organism growth;negative regulation of protein kinase B signaling;palate development;phosphatidylinositol 3-kinase signaling;phosphatidylinositol biosynthetic …	PDZ domain binding;phosphatidylinositol-3,4-bisphosphate binding	cytoplasm;cytosol;extracellular exosome;nucleoplasm;nucleus;plasma membrane;ruffle membrane				5	5	5	16.1	16.1	16.1	45.553	0	10.43	37073000	5	0.440669	1	5.44422	1.02687	sp|Q9HB21|PKHA1_HUMAN;tr|Q5RGS4|Q5RGS4_HUMAN	sp|Q9HB21|PKHA1_HUMAN;tr|Q5RGS4|Q5RGS4_HUMAN	4567	Q9HB21	PKHA1_HUMAN	Pleckstrin homology domain-containing family A member 1	H domain-containing family A member 1	PLEKHA1
17.2072	16.6648	1	1	16.5502	1				exonucleolytic nuclear-transcribed mRNA catabolic process involved in deadenylation-dependent decay;nucleotide metabolic process	5'-nucleotidase activity;magnesium ion binding;nucleotide binding	cytosol	Metabolic pathways;Nicotinate and nicotinamide metabolism;Purine metabolism;Pyrimidine metabolism			2	2	2	5.7	5.7	5.7	34.389	0.0030189	2.7229	13557000	2	0.297342	1	5.44061	0.732881	sp|Q969T7|5NT3B_HUMAN;tr|E5RJR6|E5RJR6_HUMAN;tr|U3KQB1|U3KQB1_HUMAN;tr|E5RH64|E5RH64_HUMAN;tr|C9J758|C9J758_HUMAN	sp|Q969T7|5NT3B_HUMAN;tr|E5RJR6|E5RJR6_HUMAN;tr|U3KQB1|U3KQB1_HUMAN;tr|E5RH64|E5RH64_HUMAN;tr|C9J758|C9J758_HUMAN	3768	Q969T7	5NT3B_HUMAN	7-methylguanosine phosphate-specific 5'-nucleotidase {ECO:0000305|PubMed:23223233}	#NAME?	NT5C3B
18.3338	17.594	1	18.6212	1	1				post-translational protein modification;protein ubiquitination		Cul4-RING E3 ubiquitin ligase complex;nucleoplasm				3	3	3	18.1	18.1	18.1	24.193	0	6.8227	16265000	5	0.266322	1	5.43554	0.666443	sp|Q9NXF7|DCA16_HUMAN	sp|Q9NXF7|DCA16_HUMAN	4825	Q9NXF7	DCA16_HUMAN	DDB1- and CUL4-associated factor 16		DCAF16
17.3679	1	16.6035	1	1	16.6686				heparan sulfate proteoglycan biosynthetic process;IRE1-mediated unfolded protein response;N-acetylglucosamine metabolic process;UDP-N-acetylgalactosamine metabolic process	alpha-1,4-N-acetylgalactosaminyltransferase activity;glucuronyl-galactosyl-proteoglycan 4-alpha-N-acetylglucosaminyltransferase activity;glucuronylgalactosylproteoglycan 4-beta-N-acetylgalactosaminyltransferase activity;glycosaminoglycan binding;manganese ion binding	endoplasmic reticulum;endoplasmic reticulum membrane;extracellular exosome;integral component of membrane	Glycosaminoglycan biosynthesis - heparan sulfate / heparin;Metabolic pathways			3	3	3	12.4	12.4	12.4	37.465	0	15.888	38803000	4	0.295045	1	5.43429	0.728005	sp|Q9UBQ6|EXTL2_HUMAN;tr|C9IYF5|C9IYF5_HUMAN;tr|F5GZK1|F5GZK1_HUMAN;tr|C9JEG3|C9JEG3_HUMAN	sp|Q9UBQ6|EXTL2_HUMAN;tr|C9IYF5|C9IYF5_HUMAN;tr|F5GZK1|F5GZK1_HUMAN;tr|C9JEG3|C9JEG3_HUMAN	4969	Q9UBQ6	EXTL2_HUMAN	Exostosin-like 2		EXTL2
17.1205	1	16.2422	1	1	16.0687				axon guidance;epidermal growth factor receptor signaling pathway;ERBB2 signaling pathway;leukocyte migration;negative regulation of translation;positive regulation of cell migration;stress granule assembly	identical protein binding;phosphatidylinositol binding;protein kinase binding;RNA binding;SH3/SH2 adaptor activity	cell projection;cytoplasmic stress granule;cytosol;focal adhesion;plasma membrane				3	3	3	9	9	9	59.68	0.00061513	3.9762	23814000	0	0.304847	1	5.43136	0.748768	sp|Q14451|GRB7_HUMAN	sp|Q14451|GRB7_HUMAN	2473	Q14451	GRB7_HUMAN	Growth factor receptor-bound protein 7		GRB7
16.097	18.0466	16.3443	17.0178	1	16.1986				cellular zinc ion homeostasis;nucleotide-excision repair;positive regulation of transcription from RNA polymerase II promoter;transcription, DNA-templated;zinc II ion transport	cation transmembrane transporter activity;chromatin binding;DNA binding transcription factor activity;ligand-dependent nuclear receptor binding;ligand-dependent nuclear receptor transcription coactivator activity	cytoplasmic vesicle;cytoskeleton;endoplasmic reticulum;integral component of membrane;nucleus				2	2	2	3.7	3.7	3.7	63.514	0	6.4815	57440000	5	0.444384	1	5.42385	1.03429	sp|Q6PML9|ZNT9_HUMAN	sp|Q6PML9|ZNT9_HUMAN	3043	Q6PML9	ZNT9_HUMAN	Zinc transporter 9	nT-9	SLC30A9
1	15.3566	17.2762	1	15.3722	1				neutrophil degranulation	RNA binding	extracellular region;ficolin-1-rich granule lumen;secretory granule lumen				5	5	5	20.2	20.2	20.2	29.411	0	20.47	83458000	16	0.315769	1	5.42021	0.771767	sp|Q9BU76|MMTA2_HUMAN	sp|Q9BU76|MMTA2_HUMAN	4220	Q9BU76	MMTA2_HUMAN	Multiple myeloma tumor-associated protein 2	MMTAG2	MMTAG2
17.7822	14.6485	16.1341	17.3966	13.9202	1						nucleoplasm				2	2	2	3.3	3.3	3.3	78.77	0	7.758	26937000	2	0.461487	1	5.41603	1.06835	tr|J3KMX1|J3KMX1_HUMAN;sp|Q99567|NUP88_HUMAN;tr|I3L245|I3L245_HUMAN	tr|J3KMX1|J3KMX1_HUMAN;sp|Q99567|NUP88_HUMAN;tr|I3L245|I3L245_HUMAN	4078	J3KMX1	J3KMX1_HUMAN			NUP88
17.338	17.1917	1	1	17.2918	1				vesicle-mediated transport	guanyl-nucleotide exchange factor activity	aggresome;cytosol;intracellular membrane-bounded organelle;lysosomal membrane;vesicle				4	4	4	9.1	9.1	9.1	55.866	0	8.0575	273200000	7	0.28441	1	5.41263	0.705341	sp|P86791|CCZ1_HUMAN;sp|P86790|CCZ1B_HUMAN;tr|F8WD66|F8WD66_HUMAN	sp|P86791|CCZ1_HUMAN;sp|P86790|CCZ1B_HUMAN	2104	P86791	CCZ1_HUMAN	Vacuolar fusion protein CCZ1 homolog		CCZ1
16.922	1	17.0359	16.7385	1	1										1	1	1	4	4	4	43.937	0.0008185	3.9478	14584000	6	0.292765	1	5.40645	0.72316	tr|F8VX22|F8VX22_HUMAN;tr|F8VW41|F8VW41_HUMAN;sp|Q86VP3|PACS2_HUMAN	tr|F8VX22|F8VX22_HUMAN;tr|F8VW41|F8VW41_HUMAN;sp|Q86VP3|PACS2_HUMAN	3233	F8VX22
18.092	1	17.4626	18.3505	1	1				angiogenesis;blood vessel development;cell adhesion;negative regulation of Notch signaling pathway;positive regulation of endothelial cell proliferation;vasculogenesis	calcium ion binding	extracellular matrix;extracellular region;extracellular space				2	2	2	9.9	9.9	9.9	29.617	0.0048435	2.5228	13656000	2	0.268528	1	5.40136	0.671212	sp|Q9UHF1|EGFL7_HUMAN	sp|Q9UHF1|EGFL7_HUMAN	5022	Q9UHF1	EGFL7_HUMAN	Epidermal growth factor-like protein 7	GF-like protein 7	EGFL7
17.6526	16.0667	15.8417	16.7906	15.5824	1				glutathione biosynthetic process;glutathione metabolic process	5-oxoprolinase (ATP-hydrolyzing) activity;ATP binding	cytosol	Glutathione metabolism;Metabolic pathways			7	7	7	7.8	7.8	7.8	137.46	0	24.386	53935000	13	0.455672	1	5.39598	1.05678	sp|O14841|OPLA_HUMAN;tr|A0A087WY99|A0A087WY99_HUMAN	sp|O14841|OPLA_HUMAN	300	O14841	OPLA_HUMAN	5-oxoprolinase		OPLAH
18.1986	16.4825	17.6168	17.5961	1	17.5467				cell differentiation;fatty acid metabolic process;negative regulation of sequestering of triglyceride;phosphatidic acid biosynthetic process;positive regulation of lipoprotein lipase activity;positive regulation of triglyceride catabolic process	1-acylglycerol-3-phosphate O-acyltransferase activity;lysophosphatidic acid acyltransferase activity	cytosol;lipid droplet	Regulation of lipolysis in adipocytes			3	3	3	12	12	12	39.095	0.00042799	4.921	25866000	3	0.41274	1	5.38507	0.970851	sp|Q8WTS1|ABHD5_HUMAN;tr|F8W7B5|F8W7B5_HUMAN;tr|H7BZY9|H7BZY9_HUMAN	sp|Q8WTS1|ABHD5_HUMAN	3590	Q8WTS1	ABHD5_HUMAN	1-acylglycerol-3-phosphate O-acyltransferase ABHD5		ABHD5
17.1085	1	17.1313	17.1021	1	1				chromatin assembly or disassembly		nucleolus;nucleus				5	5	5	12.8	12.8	12.8	61.956	0	80.124	61377000	6	0.285785	1	5.37925	0.708281	sp|Q9BW71|HIRP3_HUMAN	sp|Q9BW71|HIRP3_HUMAN	4271	Q9BW71	HIRP3_HUMAN	HIRA-interacting protein 3		HIRIP3
17.1807	15.3001	15.3226	16.3011	14.4008	1				muscle contraction;muscle organ development;neuromuscular junction development;positive regulation of cell-matrix adhesion;regulation of sodium ion transmembrane transporter activity;response to denervation involved in regulation of muscle adaptation	actin binding;actin filament binding;integrin binding;protein kinase binding;vinculin binding;zinc ion binding	cell junction;cortical actin cytoskeleton;cytoplasm;cytoskeleton;dystrophin-associated glycoprotein complex;extracellular exosome;filopodium;filopodium membrane;growth cone;membrane;neuromuscular junction;nucleoplasm;plasma membrane;postsynaptic membrane;protein complex;sarcolemma				15	15	15	6.2	6.2	6.2	394.46	0	44.879	163950000	20	0.480203	1	5.36716	1.10546	sp|P46939|UTRO_HUMAN;tr|Q5T097|Q5T097_HUMAN;tr|A0A0D9SG57|A0A0D9SG57_HUMAN	sp|P46939|UTRO_HUMAN	1606	P46939	UTRO_HUMAN	Utrophin		UTRN
18.5165	16.2051	1	1	1	17.6347				histone H2A acetylation;histone H3-K14 acetylation;histone H4-K12 acetylation;histone H4-K5 acetylation;histone H4-K8 acetylation;regulation of signal transduction by p53 class mediator;regulation of transcription, DNA-templated;transcription, DNA-templated		condensed chromosome kinetochore;cytosol;kinetochore;MOZ/MORF histone acetyltransferase complex;NuA4 histone acetyltransferase complex;nuclear body;nucleolus;nucleoplasm				2	2	2	17.8	17.8	17.8	21.635	0	9.422	60833000	10	0.275831	1	5.36228	0.68695	sp|Q9HAF1|EAF6_HUMAN;tr|B1AK63|B1AK63_HUMAN	sp|Q9HAF1|EAF6_HUMAN;tr|B1AK63|B1AK63_HUMAN	4557	Q9HAF1	EAF6_HUMAN	Chromatin modification-related protein MEAF6	YST/Esa1-associated factor 6	MEAF6
16.7855	16.0812	1	1	15.7879	1				mRNA processing;negative regulation of phosphatase activity	metal ion binding;RNA binding					16	1	1	17.9	1.5	1.5	113.6	0.0028388	2.7725	18169000	3	0.306345	1	5.35956	0.75193	sp|Q5T8P6|RBM26_HUMAN;tr|E2PSN0|E2PSN0_HUMAN	sp|Q5T8P6|RBM26_HUMAN	2878	Q5T8P6	RBM26_HUMAN	RNA-binding protein 26		RBM26
18.7417	1	17.6315	19.3026	1	1				protein folding	unfolded protein binding	cytosol;peroxisomal membrane				4	4	4	23.3	23.3	23.3	33.526	0	58.132	36037000	13	0.253975	1	5.35687	0.639614	sp|Q99614|TTC1_HUMAN;tr|H0YB37|H0YB37_HUMAN	sp|Q99614|TTC1_HUMAN;tr|H0YB37|H0YB37_HUMAN	4088	Q99614	TTC1_HUMAN	Tetratricopeptide repeat protein 1	PR repeat protein 1	TTC1
17.7079	15.6426	17.0924	1	15.8056	17.5681				amyloid precursor protein metabolic process;cholesterol homeostasis;cholesterol metabolic process;cholesterol transport;low-density lipoprotein particle clearance;membrane organization;positive regulation of cholesterol metabolic process;positive regulation of receptor-mediated endocytosis;positive regulation of receptor-mediated endocytosis involved in cholesterol transport;receptor internalizat…	amyloid-beta binding;AP-2 adaptor complex binding;clathrin adaptor activity;clathrin binding;low-density lipoprotein particle receptor binding;phosphatidylinositol-4,5-bisphosphate binding;phosphotyrosine residue binding;receptor signaling complex scaffold activity;signaling adaptor activity	axon;basal plasma membrane;clathrin-coated vesicle membrane;cytoplasmic side of plasma membrane;cytosol;early endosome;neurofilament;plasma membrane;recycling endosome	Cholesterol metabolism;Endocytosis			1	1	1	5.2	5.2	5.2	33.885	0.0011998	3.5629	22734000	2	0.43359	1	5.35644	1.01272	sp|Q5SW96|ARH_HUMAN	sp|Q5SW96|ARH_HUMAN	2853	Q5SW96	ARH_HUMAN	Low density lipoprotein receptor adapter protein 1 {ECO:0000305}		LDLRAP1
17.0889	15.7191	15.2477	16.3962	14.6192	1					calcium ion binding					4	4	4	4.8	4.8	4.8	128.11	0	8.0772	33388000	9	0.473633	1	5.34675	1.09245	tr|J3KN75|J3KN75_HUMAN;sp|Q0IIM8|TBC8B_HUMAN;tr|H0Y552|H0Y552_HUMAN	tr|J3KN75|J3KN75_HUMAN;sp|Q0IIM8|TBC8B_HUMAN;tr|H0Y552|H0Y552_HUMAN	2247	J3KN75	J3KN75_HUMAN			TBC1D8B
17.6646	16.6447	17.2659	1	16.7032	17.8372				ubiquitin-dependent ERAD pathway		endoplasmic reticulum;integral component of membrane;nucleolus				1	1	1	6.3	6.3	6.3	30.529	0.00041606	4.2754	24953000	7	0.418419	1	5.34495	0.98228	tr|A0A087WV67|A0A087WV67_HUMAN;sp|O00124|UBXN8_HUMAN;tr|A0A087WT23|A0A087WT23_HUMAN	tr|A0A087WV67|A0A087WV67_HUMAN;sp|O00124|UBXN8_HUMAN;tr|A0A087WT23|A0A087WT23_HUMAN	200	A0A087WV67	A0A087WV67_HUMAN			UBXN8
19.419	16.7044	19.0181	19.9058	1	18.2757					metal ion binding;superoxide dismutase activity					1	1	1	19.1	19.1	19.1	7.2852	0.0011966	3.5253	32492000	7	0.363636	1	5.32	0.871066	tr|E9PP76|E9PP76_HUMAN;tr|J3KNF4|J3KNF4_HUMAN;sp|O14618|CCS_HUMAN	tr|E9PP76|E9PP76_HUMAN;tr|J3KNF4|J3KNF4_HUMAN;sp|O14618|CCS_HUMAN	276	E9PP76	E9PP76_HUMAN			CCS
16.5261	16.0604	16.4179	1	15.6006	16.4698						integral component of membrane				1	1	1	4.4	4.4	4.4	67.909	0.00041545	4.2382	12436000	4	0.4563	1	5.31131	1.05803	sp|Q5TGY1|TMCO4_HUMAN	sp|Q5TGY1|TMCO4_HUMAN	2887	Q5TGY1	TMCO4_HUMAN	Transmembrane and coiled-coil domain-containing protein 4		TMCO4
16.1966	13.3083	1	1	12.5727	1				defense response to virus;innate immune response;positive regulation of innate immune response;positive regulation of interferon-beta production;positive regulation of type I interferon production;transcription from RNA polymerase III promoter	DNA binding;DNA-directed 5'-3' RNA polymerase activity;metal ion binding;ribonucleoside binding	cytosol;DNA-directed RNA polymerase III complex;nucleoplasm	Cytosolic DNA-sensing pathway;RNA polymerase			1	1	1	2.3	2.3	2.3	127.78	0.00042337	4.6445	5511700	1	0.366995	1	5.31075	0.877952	sp|Q9NW08|RPC2_HUMAN	sp|Q9NW08|RPC2_HUMAN	4782	Q9NW08	RPC2_HUMAN	DNA-directed RNA polymerase III subunit RPC2	NA polymerase III subunit C2	POLR3B
16.4178	15.1925	17.9601	1	14.9032	17.747					hydrolase activity;metal ion binding	extracellular exosome				3	3	3	14.7	14.7	14.7	31.371	0	6.4917	15656000	1	0.434033	1	5.30671	1.0136	sp|Q68D91|MBLC2_HUMAN	sp|Q68D91|MBLC2_HUMAN	2933	Q68D91	MBLC2_HUMAN	Metallo-beta-lactamase domain-containing protein 2		MBLAC2
18.5861	16.9034	17.8478	18.7496	17.668	1				cell surface receptor signaling pathway;phosphatidylinositol biosynthetic process;phospholipid metabolic process;positive regulation of autophagosome assembly;regulation of autophagy;regulation of phosphatidylinositol 3-kinase signaling	1-phosphatidylinositol-3-phosphate 4-kinase activity;1-phosphatidylinositol-4-phosphate 5-kinase activity;1-phosphatidylinositol-5-phosphate 4-kinase activity;ATP binding;protein homodimerization activity;signal transducer activity, downstream of receptor	autophagosome;cytosol;endoplasmic reticulum membrane;nucleoplasm;plasma membrane	Inositol phosphate metabolism;Metabolic pathways;Phosphatidylinositol signaling system;Regulation of actin cytoskeleton			9	5	5	24.8	14.7	14.7	47.377	0	36.887	368700000	38	0.38781	1	5.30655	0.920419	sp|P78356|PI42B_HUMAN;tr|A0A087WT35|A0A087WT35_HUMAN	sp|P78356|PI42B_HUMAN	2059	P78356	PI42B_HUMAN	Phosphatidylinositol 5-phosphate 4-kinase type-2 beta		PIP4K2B
16.7606	17.7531	17.621	18.401	16.8282	1						nucleus				4	4	4	14.2	14.2	14.2	41.918	0	30.789	174690000	13	0.403703	1	5.3018	0.95262	tr|B0QXZ6|B0QXZ6_HUMAN;sp|O95503|CBX6_HUMAN	tr|B0QXZ6|B0QXZ6_HUMAN;sp|O95503|CBX6_HUMAN	765	B0QXZ6	B0QXZ6_HUMAN			CBX6
16.317	1	15.8298	1	1	15.2815				glycosaminoglycan biosynthetic process;O-glycan processing	carbohydrate binding;metal ion binding;polypeptide N-acetylgalactosaminyltransferase activity	Golgi membrane;integral component of membrane	Metabolic pathways;Mucin type O-glycan biosynthesis			1	1	1	1.5	1.5	1.5	106.26	0.0050195	2.4959	17253000	0	0.312023	1	5.28841	0.763893	sp|Q7Z7M9|GALT5_HUMAN	sp|Q7Z7M9|GALT5_HUMAN	3200	Q7Z7M9	GALT5_HUMAN	Polypeptide N-acetylgalactosaminyltransferase 5		GALNT5
18.906	17.5937	17.9424	20.3515	17.2541	1				DNA repair	DNA 5'-adenosine monophosphate hydrolase activity;DNA binding					2	2	2	12.1	12.1	12.1	22.763	0	5.5323	50554000	5	0.366893	1	5.27881	0.877743	tr|F8W6G5|F8W6G5_HUMAN;tr|A0A0A0MRW7|A0A0A0MRW7_HUMAN;sp|Q7Z2E3|APTX_HUMAN;tr|C9J8U3|C9J8U3_HUMAN;tr|C9JZ40|C9JZ40_HUMAN	tr|F8W6G5|F8W6G5_HUMAN;tr|A0A0A0MRW7|A0A0A0MRW7_HUMAN;sp|Q7Z2E3|APTX_HUMAN;tr|C9J8U3|C9J8U3_HUMAN;tr|C9JZ40|C9JZ40_HUMAN	3142	F8W6G5	F8W6G5_HUMAN			APTX
13.6093	15.3644	15.8445	12.6149	15.3693	1				cell adhesion;cell-cell junction assembly;cytoskeletal anchoring at plasma membrane	actin binding;actin filament binding;structural constituent of cytoskeleton;structural molecule activity	actin cytoskeleton;cell-cell junction;cytoplasm;focal adhesion;plasma membrane;ruffle;synapse	Focal adhesion;Human T-cell leukemia virus 1 infection;Platelet activation;Rap1 signaling pathway			10	3	3	4.1	1	1	271.61	0.0019249	3.0451	62659000	8	0.520389	1	5.27796	1.18468	sp|Q9Y4G6|TLN2_HUMAN;tr|H0YMT1|H0YMT1_HUMAN;tr|H0YN01|H0YN01_HUMAN	sp|Q9Y4G6|TLN2_HUMAN;tr|H0YMT1|H0YMT1_HUMAN	5327	Q9Y4G6	TLN2_HUMAN	Talin-2		TLN2
17.9847	1	17.6333	18.8078	1	1				intracellular distribution of mitochondria		cytoplasm				30	2	2	35.4	3	3	138.23	0.00021505	5.0322	92018000	6	0.256712	1	5.27006	0.645581	tr|I3L2B0|I3L2B0_HUMAN	tr|I3L2B0|I3L2B0_HUMAN	5582	I3L2B0	I3L2B0_HUMAN			CLUH
1	15.9223	16.231	1	1	15.3449				angiogenesis;cell adhesion;positive regulation of angiogenesis;positive regulation of endothelial cell proliferation;vasculogenesis	nucleic acid binding	cytoplasm;extracellular region;perinuclear region of cytoplasm				1	1	1	1.8	1.8	1.8	80.976	0	9.3647	8118500	3	0.309966	1	5.26944	0.759565	sp|Q8N302|AGGF1_HUMAN	sp|Q8N302|AGGF1_HUMAN	3385	Q8N302	AGGF1_HUMAN	Angiogenic factor with G patch and FHA domains 1		AGGF1
17.8145	16.8094	18.4906	19.5466	16.7606	1						endoplasmic reticulum;Golgi apparatus				4	4	4	24.1	24.1	24.1	33.874	0	8.3997	46590000	6	0.382337	1	5.26911	0.909287	tr|R4GNG2|R4GNG2_HUMAN;sp|Q9UKV5|AMFR_HUMAN;tr|H3BRK9|H3BRK9_HUMAN	tr|R4GNG2|R4GNG2_HUMAN;sp|Q9UKV5|AMFR_HUMAN;tr|H3BRK9|H3BRK9_HUMAN	5100	R4GNG2	R4GNG2_HUMAN			AMFR
15.7605	13.9944	1	1	13.0118	1				motor neuron migration		membrane				2	2	2	2.7	2.7	2.7	170.67	0	5.5589	13109000	2	0.355718	1	5.24773	0.854793	sp|Q5SYE7|NHSL1_HUMAN	sp|Q5SYE7|NHSL1_HUMAN	2856	Q5SYE7	NHSL1_HUMAN	NHS-like protein 1		NHSL1
16.1631	17.276	15.407	15.7072	16.4092	1										2	2	2	2.8	2.8	2.8	106.01	0	5.926	34288000	5	0.446093	1	5.24323	1.0377	tr|A0A0A0MTP7|A0A0A0MTP7_HUMAN;tr|F8VXG7|F8VXG7_HUMAN;sp|Q99590|SCAFB_HUMAN	tr|A0A0A0MTP7|A0A0A0MTP7_HUMAN;tr|F8VXG7|F8VXG7_HUMAN;sp|Q99590|SCAFB_HUMAN	4084	A0A0A0MTP7	A0A0A0MTP7_HUMAN			SCAF11
15.5535	13.8098	1	1	12.6599	1				carbohydrate metabolic process;cellular protein modification process;glycosaminoglycan biosynthetic process;glycosaminoglycan metabolic process;negative regulation of fibroblast proliferation;protein N-linked glycosylation;proteoglycan metabolic process;supramolecular fiber organization	beta-N-acetylglucosaminylglycopeptide beta-1,4-galactosyltransferase activity;galactosyltransferase activity;manganese ion binding;xylosylprotein 4-beta-galactosyltransferase activity	Golgi apparatus;Golgi cisterna membrane;Golgi membrane;integral component of membrane	Glycosaminoglycan biosynthesis - chondroitin sulfate / dermatan sulfate;Glycosaminoglycan biosynthesis - heparan sulfate / heparin;Metabolic pathways			2	2	2	7.6	7.6	7.6	37.405	0.00042608	4.7974	8052500	3	0.36336	1	5.23444	0.870499	sp|Q9UBV7|B4GT7_HUMAN;tr|H0Y9D6|H0Y9D6_HUMAN;tr|D6RJI5|D6RJI5_HUMAN	sp|Q9UBV7|B4GT7_HUMAN;tr|H0Y9D6|H0Y9D6_HUMAN;tr|D6RJI5|D6RJI5_HUMAN	4979	Q9UBV7	B4GT7_HUMAN	Beta-1,4-galactosyltransferase 7	4Gal-T7;eta-1,4-GalTase 7;eta4Gal-T7	B4GALT7
16.2356	16.7348	16.2947	1	15.9728	16.634				cytoplasmic sequestering of transcription factor;double-strand break repair via homologous recombination;replication fork processing	histone binding;transcription corepressor activity	cytoplasm;nuclear body;nuclear replication fork;nucleoplasm				2	2	2	1.7	1.7	1.7	150.93	0.00042159	4.5909	61404000	11	0.438225	1	5.21942	1.02199	sp|Q96HA7|TONSL_HUMAN;tr|A0A087X1F6|A0A087X1F6_HUMAN	sp|Q96HA7|TONSL_HUMAN;tr|A0A087X1F6|A0A087X1F6_HUMAN	3908	Q96HA7	TONSL_HUMAN	Tonsoku-like protein		TONSL
17.3834	17.3765	19.2919	1	18.2656	19.1743				animal organ regeneration;cell cycle G1/S phase transition;cell division;cellular response to cocaine;cellular response to estradiol stimulus;cellular response to hypoxia;cellular response to insulin-like growth factor stimulus;cellular response to leptin stimulus;cellular response to luteinizing hormone stimulus;cellular response to nitric oxide;cellular response to platelet-derived growth facto…	protein domain specific binding;protein kinase binding	cyclin A2-CDK2 complex;cyclin-dependent protein kinase holoenzyme complex;cytoplasm;cytosol;female pronucleus;male pronucleus;nucleoplasm;nucleus	AMPK signaling pathway;Cell cycle;Cellular senescence;Epstein-Barr virus infection;Hepatitis B;Human papillomavirus infection;Human T-cell leukemia virus 1 infection;Progesterone-mediated oocyte maturation;Viral carcinogenesis			2	2	2	9	9	9	48.55	0.0053773	2.4535	72688000	4	0.365602	1	5.20396	0.875097	sp|P20248|CCNA2_HUMAN;sp|P78396|CCNA1_HUMAN	sp|P20248|CCNA2_HUMAN;sp|P78396|CCNA1_HUMAN	1206	P20248	CCNA2_HUMAN	Cyclin-A2 {ECO:0000312|HGNC:HGNC:1578}	yclin-A {ECO:0000303|PubMed:1967822}	CCNA2
16.7918	1	16.8284	1	1	17.0413						cytosol				1	1	1	2.1	2.1	2.1	68.456	0.0013576	3.1717	13091000	1	0.278037	1	5.19296	0.691688	tr|E9PD99|E9PD99_HUMAN;sp|Q96II8|LRCH3_HUMAN	tr|E9PD99|E9PD99_HUMAN;sp|Q96II8|LRCH3_HUMAN	3927	E9PD99	E9PD99_HUMAN			LRCH3
16.4388	16.1401	17.0798	1	16.1009	16.9904					flavin adenine dinucleotide binding;tRNA dihydrouridine synthase activity	cytosol				2	2	2	7	7	7	51.388	0.00041623	4.2901	23033000	4	0.426621	1	5.18915	0.998751	tr|E7EUN9|E7EUN9_HUMAN;sp|Q9NX74|DUS2L_HUMAN	tr|E7EUN9|E7EUN9_HUMAN;sp|Q9NX74|DUS2L_HUMAN	4819	E7EUN9	E7EUN9_HUMAN			DUS2
16.4194	1	16.0157	1	1	15.9524										2	2	2	1.2	1.2	1.2	237.3	0.0024933	3.0025	147900000	11	0.293925	1	5.1609	0.725626	sp|Q5THK1|PR14L_HUMAN;tr|C9J9V0|C9J9V0_HUMAN;tr|H7BZH1|H7BZH1_HUMAN	sp|Q5THK1|PR14L_HUMAN;tr|C9J9V0|C9J9V0_HUMAN;tr|H7BZH1|H7BZH1_HUMAN	2889	Q5THK1	PR14L_HUMAN	Protein PRR14L		PRR14L
16.609	16.4296	17.3181	1	16.7909	17.0925				dolichol-linked oligosaccharide biosynthetic process;protein glycosylation	chitobiosyldiphosphodolichol beta-mannosyltransferase activity;mannosyltransferase activity	endoplasmic reticulum;endoplasmic reticulum membrane;integral component of membrane;membrane	Metabolic pathways;N-Glycan biosynthesis			4	4	4	11.2	11.2	11.2	52.518	0	5.7183	20377000	3	0.411933	1	5.15777	0.969226	sp|Q9BT22|ALG1_HUMAN;tr|K7EID2|K7EID2_HUMAN;tr|K7EPU3|K7EPU3_HUMAN	sp|Q9BT22|ALG1_HUMAN;tr|K7EID2|K7EID2_HUMAN	4194	Q9BT22	ALG1_HUMAN	Chitobiosyldiphosphodolichol beta-mannosyltransferase		ALG1
19.8919	15.8026	1	19.2466	1	1						cytosol;extracellular exosome;Golgi apparatus;nucleoplasm				4	4	4	18.2	18.2	18.2	39.933	0	14.396	24226000	5	0.243104	1	5.1493	0.615797	sp|Q96A49|SYAP1_HUMAN	sp|Q96A49|SYAP1_HUMAN	3780	Q96A49	SYAP1_HUMAN	Synapse-associated protein 1		SYAP1
16.7263	14.7036	16.1521	1	14.0544	17.1055				positive regulation of rRNA processing;positive regulation of transcription from RNA polymerase I promoter;rRNA processing;transcription, DNA-templated	RNA binding	cytoplasm;endoplasmic reticulum;fibrillar center;nucleolus;nucleoplasm	Ribosome biogenesis in eukaryotes			9	9	9	27.6	27.6	27.6	58.414	0	33.297	111700000	16	0.443818	1	5.14067	1.03316	sp|Q8TED0|UTP15_HUMAN;tr|H0Y8P4|H0Y8P4_HUMAN;tr|D6RF65|D6RF65_HUMAN	sp|Q8TED0|UTP15_HUMAN;tr|H0Y8P4|H0Y8P4_HUMAN	3576	Q8TED0	UTP15_HUMAN	U3 small nucleolar RNA-associated protein 15 homolog		UTP15
19.2387	15.9968	18.5265	1	17.4652	19.9063				cellular protein modification process;cellular response to starvation;nucleocytoplasmic transport;positive regulation of proteasomal ubiquitin-dependent protein catabolic process;positive regulation of protein ubiquitination involved in ubiquitin-dependent protein catabolic process;post-translational protein modification;protein polyubiquitination;regulation of skeletal muscle fiber development;u…	ubiquitin-protein transferase activity	cytosol;nucleus;Z disc				6	6	6	25.1	25.1	25.1	44.508	0	36.158	144400000	12	0.354578	1	5.13014	0.852446	sp|Q8NEZ5|FBX22_HUMAN;tr|H3BTH6|H3BTH6_HUMAN;tr|H3BVA4|H3BVA4_HUMAN;tr|H3BUC1|H3BUC1_HUMAN;tr|H3BTR7|H3BTR7_HUMAN;tr|H3BRE0|H3BRE0_HUMAN	sp|Q8NEZ5|FBX22_HUMAN;tr|H3BTH6|H3BTH6_HUMAN;tr|H3BVA4|H3BVA4_HUMAN	3498	Q8NEZ5	FBX22_HUMAN	F-box only protein 22		FBXO22
1	17.1435	16.1275	1	16.928	1					metal ion binding					3	3	3	7.8	7.8	7.8	49.203	0.0084157	2.2727	15501000	2	0.275802	1	5.11435	0.686888	tr|H3BRF9|H3BRF9_HUMAN;sp|Q96K21|ANCHR_HUMAN;tr|H3BN64|H3BN64_HUMAN;tr|H3BRM1|H3BRM1_HUMAN;tr|H3BUW6|H3BUW6_HUMAN	tr|H3BRF9|H3BRF9_HUMAN;sp|Q96K21|ANCHR_HUMAN;tr|H3BN64|H3BN64_HUMAN;tr|H3BRM1|H3BRM1_HUMAN	3951	H3BRF9	H3BRF9_HUMAN			ZFYVE19
17.1291	1	16.1286	1	16.9187	1					RNA binding	nucleoplasm				6	6	6	11.1	11.1	11.1	102.13	0	23.214	94310000	14	0.275887	1	5.11299	0.687069	tr|A0A087WWP4|A0A087WWP4_HUMAN;sp|Q96T37|RBM15_HUMAN	tr|A0A087WWP4|A0A087WWP4_HUMAN;sp|Q96T37|RBM15_HUMAN	4050	A0A087WWP4	A0A087WWP4_HUMAN			RBM15
16.2985	16.8687	16.4083	17.2539	16.01	1					heme binding;iron ion binding;monooxygenase activity;oxidoreductase activity, acting on paired donors, with incorporation or reduction of molecular oxygen	integral component of membrane;membrane				2	2	2	6.1	6.1	6.1	52.432	0.0011772	3.275	23654000	4	0.415623	1	5.10392	0.976655	sp|Q6UW02|CP20A_HUMAN;tr|E9PHG5|E9PHG5_HUMAN;tr|Q8WZ13|Q8WZ13_HUMAN;tr|F8WBE2|F8WBE2_HUMAN;tr|C9J8K7|C9J8K7_HUMAN	sp|Q6UW02|CP20A_HUMAN;tr|E9PHG5|E9PHG5_HUMAN;tr|Q8WZ13|Q8WZ13_HUMAN;tr|F8WBE2|F8WBE2_HUMAN;tr|C9J8K7|C9J8K7_HUMAN	3055	Q6UW02	CP20A_HUMAN	Cytochrome P450 20A1		CYP20A1
15.5751	15.7236	1	1	15.0115	1										14	2	2	13.4	2.4	2.4	142.58	0	6.9127	48668000	8	0.307378	1	5.0957	0.75411	tr|E7EVJ5|E7EVJ5_HUMAN;sp|Q96F07|CYFP2_HUMAN;tr|H7C229|H7C229_HUMAN;tr|E7EW33|E7EW33_HUMAN;tr|A0A087WVE1|A0A087WVE1_HUMAN;tr|A0A087WTQ3|A0A087WTQ3_HUMAN;tr|A0A087WWZ1|A0A087WWZ1_HUMAN;tr|A0A087X0D6|A0A087X0D6_HUMAN;tr|A0A087WV63|A0A087WV63_HUMAN;tr|A0A0G2JRF5|A0A0G2JRF5_HUMAN;tr|A0A087WWY5|A0A087WWY5_HUMAN;tr|A0A087WZL7|A0A087WZL7_HUMAN	tr|E7EVJ5|E7EVJ5_HUMAN;sp|Q96F07|CYFP2_HUMAN;tr|H7C229|H7C229_HUMAN;tr|E7EW33|E7EW33_HUMAN	5507	E7EVJ5	E7EVJ5_HUMAN			CYFIP2
16.5687	15.6791	1	15.9743	1	1				cellular metabolic process						19	1	1	47.3	3.8	3.8	57.495	0	6.5318	39093000	10	0.289953	1	5.09117	0.717173	tr|A0A087WTA5|A0A087WTA5_HUMAN	tr|A0A087WTA5|A0A087WTA5_HUMAN	5431	A0A087WTA5	A0A087WTA5_HUMAN			EIF2B4
14.6018	12.9388	14.1171	1	12.1467	13.2802				innate immune response;negative regulation of gene expression;negative regulation of interferon-gamma-mediated signaling pathway;negative regulation of tyrosine phosphorylation of STAT protein;positive regulation of interleukin-4-mediated signaling pathway;positive regulation of tyrosine phosphorylation of STAT protein;protein ADP-ribosylation;protein poly-ADP-ribosylation;regulation of transcrip…	enzyme binding;NAD+ ADP-ribosyltransferase activity;NAD+ binding;RNA binding	cytoplasm;cytosol;membrane;nucleus				5	5	5	4.1	4.1	4.1	202.8	0	9.486	35352000	7	0.571905	1	5.0769	1.28556	sp|Q460N5|PAR14_HUMAN;tr|H7C5R8|H7C5R8_HUMAN	sp|Q460N5|PAR14_HUMAN;tr|H7C5R8|H7C5R8_HUMAN	2747	Q460N5	PAR14_HUMAN	Poly [ADP-ribose] polymerase 14	ARP-14	PARP14
16.5762	17.4306	16.6887	1	18.9124	15.5796				maturation of SSU-rRNA from tricistronic rRNA transcript (SSU-rRNA, 5.8S rRNA, LSU-rRNA);rRNA processing	RNA binding	nuclear membrane;nucleolus;nucleoplasm;nucleus;Pwp2p-containing subcomplex of 90S preribosome;small-subunit processome	Ribosome biogenesis in eukaryotes			11	11	11	29.9	29.9	29.9	62.003	0	93.49	629410000	56	0.387758	1	5.06785	0.920314	sp|Q9Y5J1|UTP18_HUMAN;tr|J3KSR7|J3KSR7_HUMAN;tr|J3QRG0|J3QRG0_HUMAN;tr|J3QR85|J3QR85_HUMAN;tr|J3QLD6|J3QLD6_HUMAN	sp|Q9Y5J1|UTP18_HUMAN	5353	Q9Y5J1	UTP18_HUMAN	U3 small nucleolar RNA-associated protein 18 homolog		UTP18
18.8559	16.6552	19.3535	19.1826	1	19.5248				apoptotic process;L-methionine salvage from methylthioadenosine;negative regulation of apoptotic process;protein homotetramerization;pyroptosis;regulation of ERK1 and ERK2 cascade	identical protein binding;methylthioribulose 1-phosphate dehydratase activity;zinc ion binding	cytoplasm	Cysteine and methionine metabolism;Metabolic pathways			4	4	4	25.2	25.2	25.2	27.125	0	16.583	57882000	13	0.338041	1	5.05241	0.818255	sp|Q96GX9|MTNB_HUMAN;tr|S4R3D6|S4R3D6_HUMAN	sp|Q96GX9|MTNB_HUMAN;tr|S4R3D6|S4R3D6_HUMAN	3903	Q96GX9	MTNB_HUMAN	Methylthioribulose-1-phosphate dehydratase {ECO:0000255|HAMAP-Rule:MF_03116}	TRu-1-P dehydratase {ECO:0000255|HAMAP-Rule:MF_03116}	APIP
17.4651	15.9237	1	1	17.2755	1				cytokinesis;microtubule bundle formation;mitotic spindle elongation;positive regulation of cell proliferation	identical protein binding;kinesin binding;microtubule binding;protein kinase binding	contractile ring;cytosol;microtubule cytoskeleton;midbody;nucleoplasm;nucleus;plasma membrane;spindle;spindle microtubule;spindle pole				14	14	14	30.5	30.5	30.5	71.606	0	36.662	226390000	37	0.266707	1	5.03775	0.667275	sp|O43663|PRC1_HUMAN;tr|H0YL53|H0YL53_HUMAN;tr|G3V3N7|G3V3N7_HUMAN;tr|H0YM42|H0YM42_HUMAN;tr|H0YNE4|H0YNE4_HUMAN;tr|H0YLA0|H0YLA0_HUMAN	sp|O43663|PRC1_HUMAN	438	O43663	PRC1_HUMAN	Protein regulator of cytokinesis 1 {ECO:0000312|HGNC:HGNC:9341}		PRC1
1	15.1291	15.6433	1	14.6907	1				cell motility;cytoskeleton organization;Fc-gamma receptor signaling pathway involved in phagocytosis;inositol lipid-mediated signaling;lipid catabolic process;phosphatidic acid biosynthetic process;small GTPase mediated signal transduction;synaptic vesicle recycling	N-acylphosphatidylethanolamine-specific phospholipase D activity;phosphatidylinositol binding;phospholipase D activity	endoplasmic reticulum membrane;Golgi apparatus;plasma membrane;presynapse	cAMP signaling pathway;Choline metabolism in cancer;Endocytosis;Ether lipid metabolism;Fc gamma R-mediated phagocytosis;Glutamatergic synapse;Glycerophospholipid metabolism;GnRH signaling pathway;Metabolic pathways;Parathyroid hormone synthesis, secretion and action;Phospholipase D signaling pathway;Ras signaling pathway;Sphingolipid signaling pathway			5	5	5	7.7	7.7	7.7	105.99	0	14.038	43432000	12	0.309809	1	5.02724	0.759233	sp|O14939|PLD2_HUMAN;tr|I3L1F3|I3L1F3_HUMAN;tr|I3L222|I3L222_HUMAN	sp|O14939|PLD2_HUMAN	312	O14939	PLD2_HUMAN	Phospholipase D2	LD 2;PLD2	PLD2
17.4794	17.4789	20.2357	18.8442	1	20.2908				apoptotic process;positive regulation of cell death;regulation of transcription, DNA-templated;transcription, DNA-templated		intermediate filament cytoskeleton;nucleoplasm;nucleus				9	9	9	41.2	41.2	41.2	33.87	0	26.933	379150000	38	0.32949	1	5.01967	0.800468	sp|Q9UHR5|S30BP_HUMAN;tr|J3QQJ0|J3QQJ0_HUMAN;tr|X6R3T8|X6R3T8_HUMAN;tr|J3QLH3|J3QLH3_HUMAN;tr|F5H478|F5H478_HUMAN;tr|J3KRU5|J3KRU5_HUMAN;tr|J3KS14|J3KS14_HUMAN;tr|J3QLM2|J3QLM2_HUMAN;tr|J3KRR6|J3KRR6_HUMAN	sp|Q9UHR5|S30BP_HUMAN;tr|J3QQJ0|J3QQJ0_HUMAN;tr|X6R3T8|X6R3T8_HUMAN;tr|J3QLH3|J3QLH3_HUMAN;tr|F5H478|F5H478_HUMAN;tr|J3KRU5|J3KRU5_HUMAN	5032	Q9UHR5	S30BP_HUMAN	SAP30-binding protein		SAP30BP
1	14.5097	15.6733	14.1285	1	1				histone exchange;nucleosome assembly;regulation of chromatin assembly;regulation of transcription, DNA-templated;transcription, DNA-templated	DNA binding;histone binding;RNA polymerase I core binding	nucleolus				4	4	4	9.8	9.8	9.8	75.598	0	9.8524	73000000	13	0.319981	1	5.01816	0.7806	sp|Q68D10|SPT2_HUMAN	sp|Q68D10|SPT2_HUMAN	2932	Q68D10	SPT2_HUMAN	Protein SPT2 homolog		SPTY2D1
13.6148	15.9292	17.1153	13.9239	1	16.6987				activation of GTPase activity;regulation of small GTPase mediated signal transduction	GTPase activator activity;protein heterodimerization activity	cytoplasm;nucleus				7	7	7	3.7	3.7	3.7	229.83	0	9.448	70778000	8	0.434008	1	5.01223	1.01355	sp|Q6GYQ0|RGPA1_HUMAN;tr|H0YJB5|H0YJB5_HUMAN;tr|H0YJ04|H0YJ04_HUMAN	sp|Q6GYQ0|RGPA1_HUMAN	2955	Q6GYQ0	RGPA1_HUMAN	Ral GTPase-activating protein subunit alpha-1		RALGAPA1
16.0348	14.7289	14.3297	13.3485	1	15.7582				DNA metabolic process	actin filament binding;ATP binding;DNA binding;DNA-dependent ATPase activity;motor activity	myosin complex				8	8	8	6.1	6.1	6.1	231.1	0	19.493	44914000	9	0.470385	1	4.99555	1.08601	tr|A0A0D9SFK2|A0A0D9SFK2_HUMAN;sp|Q92614|MY18A_HUMAN;tr|H0YEV9|H0YEV9_HUMAN	tr|A0A0D9SFK2|A0A0D9SFK2_HUMAN;sp|Q92614|MY18A_HUMAN	3691	A0A0D9SFK2	A0A0D9SFK2_HUMAN			MYO18A
15.9878	15.7749	16.4724	1	16.31	15.9448				intracellular signal transduction	ATP binding;metal ion binding;protein serine/threonine kinase activity;signal transducer activity, downstream of receptor	intracellular				5	5	2	13.3	13.3	6.8	59.741	0	12.722	75769000	14	0.421878	1	4.99344	0.989232	tr|H7C155|H7C155_HUMAN;sp|P04049|RAF1_HUMAN;tr|H7C4S5|H7C4S5_HUMAN	tr|H7C155|H7C155_HUMAN;sp|P04049|RAF1_HUMAN	861	H7C155	H7C155_HUMAN			RAF1
16.1425	16.0407	16.8543	1	15.8562	17.2013				mitochondrial threonyl-tRNA aminoacylation	aminoacyl-tRNA editing activity;ATP binding;protein homodimerization activity;threonine-tRNA ligase activity	mitochondrial matrix;mitochondrion	Aminoacyl-tRNA biosynthesis			5	5	5	11.7	11.7	11.7	81.035	0	6.7131	29203000	7	0.407754	1	4.99336	0.960799	sp|Q9BW92|SYTM_HUMAN;tr|U3KQG0|U3KQG0_HUMAN;tr|F6S7Q7|F6S7Q7_HUMAN;tr|Q5T5E9|Q5T5E9_HUMAN;tr|U3KQ50|U3KQ50_HUMAN	sp|Q9BW92|SYTM_HUMAN;tr|U3KQG0|U3KQG0_HUMAN;tr|F6S7Q7|F6S7Q7_HUMAN	4276	Q9BW92	SYTM_HUMAN	Threonine--tRNA ligase, mitochondrial		TARS2
16.9893	15.6322	1	1	16.6441	1				maturation of 5.8S rRNA;maturation of LSU-rRNA		PeBoW complex;preribosome, large subunit precursor				8	8	8	22.5	22.5	22.5	54.665	0	52.791	156960000	20	0.274104	1	4.99244	0.683235	sp|Q9Y2I8|WDR37_HUMAN;tr|C9JGR9|C9JGR9_HUMAN;tr|E7EQ49|E7EQ49_HUMAN;tr|A0A087WTQ2|A0A087WTQ2_HUMAN	sp|Q9Y2I8|WDR37_HUMAN;tr|C9JGR9|C9JGR9_HUMAN;tr|E7EQ49|E7EQ49_HUMAN;tr|A0A087WTQ2|A0A087WTQ2_HUMAN	5225	Q9Y2I8	WDR37_HUMAN	WD repeat-containing protein 37		WDR37
14.9679	13.6054	1	1	12.6598	1										3	2	2	3.2	2.5	2.5	146.68	0	6.3562	15678000	4	0.349407	1	4.97117	0.841783	tr|E9PFH7|E9PFH7_HUMAN;sp|Q9UPT6|JIP3_HUMAN;tr|A0A087WYG2|A0A087WYG2_HUMAN	tr|E9PFH7|E9PFH7_HUMAN;sp|Q9UPT6|JIP3_HUMAN;tr|A0A087WYG2|A0A087WYG2_HUMAN	5179	E9PFH7	E9PFH7_HUMAN			MAPK8IP3
16.6981	15.5712	17.8604	18.4609	15.8103	1				mRNA 3'-end processing;mRNA splicing, via spliceosome;pre-mRNA cleavage required for polyadenylation;termination of RNA polymerase II transcription	mRNA binding;RNA binding	intracellular;mRNA cleavage and polyadenylation specificity factor complex;nucleoplasm	mRNA surveillance pathway			3	3	3	9.6	9.6	9.6	64.436	0.0024947	3.0077	32031000	3	0.380231	1	4.95282	0.904998	sp|Q9H0L4|CSTFT_HUMAN;tr|E9PID8|E9PID8_HUMAN;sp|P33240|CSTF2_HUMAN;tr|E7EWR4|E7EWR4_HUMAN	sp|Q9H0L4|CSTFT_HUMAN;tr|E9PID8|E9PID8_HUMAN;sp|P33240|CSTF2_HUMAN;tr|E7EWR4|E7EWR4_HUMAN	4392	Q9H0L4	CSTFT_HUMAN	Cleavage stimulation factor subunit 2 tau variant		CSTF2T
18.6212	16.6043	18.3676	18.806	1	18.9417				apoptotic process;defense response to virus;inflammatory response;innate immune response;negative regulation of alpha-beta T cell proliferation;negative regulation of apoptotic process;negative regulation of defense response to virus;negative regulation of JNK cascade;negative regulation of NF-kappaB transcription factor activity;negative regulation of type I interferon production;Notch signaling…	arrestin family protein binding;CXCR chemokine receptor binding;ligase activity;ribonucleoprotein complex binding;ubiquitin protein ligase activity;ubiquitin-like protein ligase binding;ubiquitin-like protein transferase activity;ubiquitin-protein transferase activity	cell cortex;cytoplasm;cytosol;early endosome membrane;extracellular exosome;membrane;nucleoplasm;plasma membrane;protein complex	Endocytosis;Non-alcoholic fatty liver disease (NAFLD);TNF signaling pathway;Ubiquitin mediated proteolysis			8	8	8	10.6	10.6	10.6	102.8	0	20.479	130890000	12	0.341721	1	4.94849	0.825887	sp|Q96J02|ITCH_HUMAN	sp|Q96J02|ITCH_HUMAN	3934	Q96J02	ITCH_HUMAN	E3 ubiquitin-protein ligase Itchy homolog	tch	ITCH
16.2883	13.782	17.1994	15.5819	15.8501	1				covalent chromatin modification;erythrocyte maturation;granulocyte differentiation;macrophage differentiation;transcription, DNA-templated	DNA binding transcription factor activity;zinc ion binding	nucleolus;nucleus				5	5	5	8.7	8.7	8.7	88.336	0	39.709	115160000	16	0.420747	1	4.94587	0.986959	sp|Q96JM7|LMBL3_HUMAN;tr|E9PLL7|E9PLL7_HUMAN	sp|Q96JM7|LMBL3_HUMAN	3943	Q96JM7	LMBL3_HUMAN	Lethal(3)malignant brain tumor-like protein 3	(3)mbt-like protein 3;-l(3)mbt-like protein 3	L3MBTL3
16.4515	15.1871	14.8548	16.2685	14.4152	1				cytoskeleton organization;negative regulation of apoptotic process;regulation of small GTPase mediated signal transduction;signal transduction	GTPase activator activity	cytosol;perinuclear region of cytoplasm;plasma membrane	Bacterial invasion of epithelial cells			10	10	10	17.4	17.4	17.4	89.374	0	20.491	227810000	22	0.437738	1	4.93658	1.02101	sp|A1A4S6|RHG10_HUMAN;tr|H0Y8W5|H0Y8W5_HUMAN	sp|A1A4S6|RHG10_HUMAN	169	A1A4S6	RHG10_HUMAN	Rho GTPase-activating protein 10		ARHGAP10
16.0465	15.151	16.3327	1	15.0591	16.6707				isoprenoid biosynthetic process;protein heterotetramerization;regulation of body fluid levels;ubiquinone biosynthetic process	protein heterodimerization activity;trans-hexaprenyltranstransferase activity;trans-octaprenyltranstransferase activity	cytosol;mitochondrial matrix;transferase complex	Terpenoid backbone biosynthesis			2	2	2	7	7	7	44.128	0.00021603	5.1107	13474000	3	0.421651	1	4.93347	0.988776	sp|Q86YH6|DLP1_HUMAN	sp|Q86YH6|DLP1_HUMAN	3269	Q86YH6	DLP1_HUMAN	Decaprenyl-diphosphate synthase subunit 2		PDSS2
16.5442	15.9782	16.359	17.5312	1	15.5602										2	2	2	5.1	5.1	5.1	63.512	0.0011969	3.527	28588000	3	0.40005	1	4.93005	0.945234	tr|A8DPD7|A8DPD7_HUMAN;sp|Q9C0D3|ZY11B_HUMAN	tr|A8DPD7|A8DPD7_HUMAN;sp|Q9C0D3|ZY11B_HUMAN	4351	A8DPD7	A8DPD7_HUMAN
17.0684	16.1931	18.463	1	16.7993	19.156				endosome to lysosome transport via multivesicular body sorting pathway;ERAD pathway;macroautophagy		cytoplasm;cytosol;early endosome membrane;extracellular exosome;extrinsic component of membrane;late endosome membrane;lysosomal membrane;microtubule organizing center;nucleus;protein complex	Protein processing in endoplasmic reticulum			6	6	6	24	24	24	49.753	0	31.747	94051000	11	0.357257	1	4.92311	0.857961	sp|Q9BZV1|UBXN6_HUMAN;tr|K7EP32|K7EP32_HUMAN	sp|Q9BZV1|UBXN6_HUMAN;tr|K7EP32|K7EP32_HUMAN	4341	Q9BZV1	UBXN6_HUMAN	UBX domain-containing protein 6 {ECO:0000305}		UBXN6
24.002	15.3692	20.4567	23.7557	1	20.3079				regulation of translational initiation	ribosome binding;translation initiation factor activity	eukaryotic translation initiation factor 3 complex				4	4	4	31.4	31.4	31.4	15.875	0	15.627	306770000	12	0.261149	1	4.92146	0.65523	tr|K7ES31|K7ES31_HUMAN;tr|K7ERF1|K7ERF1_HUMAN;sp|Q9UBQ5|EIF3K_HUMAN;tr|K7EQM4|K7EQM4_HUMAN;tr|A0A087WVB9|A0A087WVB9_HUMAN	tr|K7ES31|K7ES31_HUMAN;tr|K7ERF1|K7ERF1_HUMAN;sp|Q9UBQ5|EIF3K_HUMAN	4968	K7ES31	K7ES31_HUMAN			EIF3K
1	16.704	18.5408	19.5612	1	1				protein transport;vesicle-mediated transport		integral component of membrane;membrane				1	1	1	17	17	17	17.804	0.00042872	4.9643	7570200	2	0.230584	1	4.89456	0.588123	sp|Q8WV19|SFT2A_HUMAN	sp|Q8WV19|SFT2A_HUMAN	3611	Q8WV19	SFT2A_HUMAN	Vesicle transport protein SFT2A		SFT2D1
17.0531	14.9054	1	1	16.3738	1						nucleolus;nucleus				2	1	1	8.8	4.6	4.6	28.856	0.0026641	2.8766	7723200	1	0.271182	1	4.86159	0.67694	tr|J3KT43|J3KT43_HUMAN;sp|Q9UHQ1|NARF_HUMAN;tr|E7EP87|E7EP87_HUMAN;tr|A0A088AWN8|A0A088AWN8_HUMAN;tr|J3QRB0|J3QRB0_HUMAN;tr|J3KS48|J3KS48_HUMAN;tr|E9PH27|E9PH27_HUMAN	tr|J3KT43|J3KT43_HUMAN;sp|Q9UHQ1|NARF_HUMAN;tr|E7EP87|E7EP87_HUMAN;tr|A0A088AWN8|A0A088AWN8_HUMAN;tr|J3QRB0|J3QRB0_HUMAN;tr|J3KS48|J3KS48_HUMAN;tr|E9PH27|E9PH27_HUMAN	5028	J3KT43	J3KT43_HUMAN			NARF
1	15.9201	15.2449	1	15.6032	1					phosphatidylinositol binding					3	3	3	6	6	6	64.079	0.0023033	3.0153	34400000	3	0.284398	1	4.85392	0.705316	tr|C9J715|C9J715_HUMAN;sp|Q9Y2I1|NISCH_HUMAN	tr|C9J715|C9J715_HUMAN;sp|Q9Y2I1|NISCH_HUMAN	5224	C9J715	C9J715_HUMAN			NISCH
16.383	14.1585	15.3231	1	13.753	16.6833				cellular sodium ion homeostasis;excretion;ion transmembrane transport;negative regulation of potassium ion transmembrane transport;negative regulation of potassium ion transmembrane transporter activity;negative regulation of protein localization to cell surface;negative regulation of sodium ion transmembrane transport;negative regulation of sodium ion transmembrane transporter activity;negative …	ion channel binding;potassium channel inhibitor activity;potassium channel regulator activity;sodium channel inhibitor activity;sodium channel regulator activity;ubiquitin protein ligase activity;ubiquitin-protein transferase activity	cytoplasm;cytosol;extracellular exosome;Golgi apparatus;intracellular;multivesicular body;nucleoplasm	Aldosterone-regulated sodium reabsorption;Endocytosis;Tight junction;Ubiquitin mediated proteolysis			3	3	3	4.3	4.3	4.3	111.93	0	7.2058	20630000	5	0.422364	1	4.8094	0.990209	sp|Q96PU5|NED4L_HUMAN;tr|H0Y8H4|H0Y8H4_HUMAN;tr|K7ERN1|K7ERN1_HUMAN	sp|Q96PU5|NED4L_HUMAN	3997	Q96PU5	NED4L_HUMAN	E3 ubiquitin-protein ligase NEDD4-like		NEDD4L
1	17.1489	17.4844	1	1	19.2322					RNA binding	chromosome;fibrillar center;nucleolus				11	11	11	40.1	40.1	40.1	33.231	0	36.454	268980000	30	0.230774	1	4.80036	0.588545	sp|Q6PK04|CC137_HUMAN;tr|I3L0U5|I3L0U5_HUMAN;tr|I3L4F6|I3L4F6_HUMAN	sp|Q6PK04|CC137_HUMAN;tr|I3L0U5|I3L0U5_HUMAN	3039	Q6PK04	CC137_HUMAN	Coiled-coil domain-containing protein 137		CCDC137
1	15.1637	16.4527	16.3063	1	1					ATP binding					5	5	5	18.4	18.4	18.4	38.615	0.00021692	5.2574	16824000	4	0.268434	1	4.77004	0.671008	sp|Q96EK9|KTI12_HUMAN	sp|Q96EK9|KTI12_HUMAN	3856	Q96EK9	KTI12_HUMAN	Protein KTI12 homolog		KTI12
1	14.9675	16.7543	1	1	16.6323					hydrolase activity					2	2	2	11.1	11.1	11.1	21.809	0.00042034	4.4977	4980400	1	0.259462	1	4.69654	0.651565	tr|K7EIN2|K7EIN2_HUMAN;sp|Q9BRJ7|SDOS_HUMAN;tr|K7ENA3|K7ENA3_HUMAN;sp|Q96DE0|NUD16_HUMAN	tr|K7EIN2|K7EIN2_HUMAN;sp|Q9BRJ7|SDOS_HUMAN;tr|K7ENA3|K7ENA3_HUMAN;sp|Q96DE0|NUD16_HUMAN	4163	K7EIN2	K7EIN2_HUMAN			NUDT16L1
22.2324	15.3529	21.4032	22.132	1	21.8201				exonucleolytic nuclear-transcribed mRNA catabolic process involved in deadenylation-dependent decay;mRNA splicing, via spliceosome;RNA processing	U6 snRNA binding	catalytic step 2 spliceosome;cytosol;Lsm1-7-Pat1 complex;nucleoplasm;spliceosomal tri-snRNP complex;U12-type spliceosomal complex;U2-type prespliceosome;U6 snRNP	RNA degradation;Spliceosome			2	2	2	32	32	32	11.602	0	24.393	102530000	3	0.253732	1	4.67877	0.639085	sp|Q9UK45|LSM7_HUMAN;tr|A0A087X2I5|A0A087X2I5_HUMAN	sp|Q9UK45|LSM7_HUMAN;tr|A0A087X2I5|A0A087X2I5_HUMAN	5077	Q9UK45	LSM7_HUMAN	U6 snRNA-associated Sm-like protein LSm7		LSM7
18.6964	13.2608	17.3007	17.0296	1	17.1953				fatty acid beta-oxidation;fatty acid biosynthetic process;fatty acid metabolic process	trans-2-enoyl-CoA reductase (NADPH) activity	mitochondrial matrix;mitochondrion;nucleus	Fatty acid biosynthesis;Fatty acid elongation;Fatty acid metabolism;Metabolic pathways			3	3	3	16.4	16.4	16.4	40.461	0	7.2446	13943000	4	0.345342	1	4.67766	0.833382	sp|Q9BV79|MECR_HUMAN;tr|H3BM30|H3BM30_HUMAN	sp|Q9BV79|MECR_HUMAN	4242	Q9BV79	MECR_HUMAN	Enoyl-[acyl-carrier-protein] reductase, mitochondrial {ECO:0000305}		MECR
15.8653	15.1505	16.6233	16.7494	1	15.9877										2	2	2	3	3	3	129.6	0	8.8473	37792000	3	0.378103	1	4.63403	0.900657	tr|A0A075B6T1|A0A075B6T1_HUMAN;sp|Q9C0C7|AMRA1_HUMAN;tr|H0YE34|H0YE34_HUMAN	tr|A0A075B6T1|A0A075B6T1_HUMAN;sp|Q9C0C7|AMRA1_HUMAN;tr|H0YE34|H0YE34_HUMAN	4349	A0A075B6T1	A0A075B6T1_HUMAN			AMBRA1
15.9861	15.2054	1	16.3331	1	1				cellular response to electrical stimulus;cytoskeleton organization;movement of cell or subcellular component;negative regulation of adenylate cyclase activity;negative regulation of dopamine receptor signaling pathway;positive regulation of filopodium assembly;protein localization to plasma membrane;regulation of cell shape;synapse maturation	D3 dopamine receptor binding	apicolateral plasma membrane;axon;basolateral plasma membrane;cytoplasmic vesicle;dendritic spine membrane;filopodium membrane;integral component of plasma membrane;intracellular membrane-bounded organelle;nucleus;plasma membrane;postsynaptic density				3	3	3	13.4	13.4	13.4	42.075	0	10.197	21486000	6	0.260724	1	4.61943	0.654307	sp|O75781|PALM_HUMAN;tr|A0A087WWY4|A0A087WWY4_HUMAN;tr|A0A087WTK8|A0A087WTK8_HUMAN	sp|O75781|PALM_HUMAN	630	O75781	PALM_HUMAN	Paralemmin-1		PALM
16.4226	16.0172	15.8033	1	16.3906	17.0386				endonucleolytic cleavage of tricistronic rRNA transcript (SSU-rRNA, 5.8S rRNA, LSU-rRNA);maturation of SSU-rRNA from tricistronic rRNA transcript (SSU-rRNA, 5.8S rRNA, LSU-rRNA);ribosome assembly;rRNA processing	ATP binding;GTP binding;GTPase activity;RNA binding;U3 snoRNA binding	90S preribosome;nucleolus;nucleoplasm;nucleus	Ribosome biogenesis in eukaryotes			12	12	12	11.5	11.5	11.5	145.81	0	30.403	168740000	22	0.366996	1	4.60461	0.877955	sp|Q14692|BMS1_HUMAN	sp|Q14692|BMS1_HUMAN	2498	Q14692	BMS1_HUMAN	Ribosome biogenesis protein BMS1 homolog		BMS1
14.0812	13.6522	12.4626	14.6908	10.7438	1				angiogenesis;branching involved in salivary gland morphogenesis;branching involved in ureteric bud morphogenesis;cell differentiation;cell migration;cell proliferation;cell recognition;cilium assembly;cytoskeleton organization;embryo development;endothelial cell differentiation;extracellular matrix organization;focal adhesion assembly;hair follicle development;integrin-mediated signaling pathway;…	integrin binding;structural molecule activity	basal lamina;basement membrane;extracellular exosome;extracellular matrix;extracellular region;extracellular space;laminin-10 complex;laminin-11 complex;laminin-5 complex;nucleus;synaptic cleft	Amoebiasis;ECM-receptor interaction;Focal adhesion;Human papillomavirus infection;Pathways in cancer;PI3K-Akt signaling pathway;Small cell lung cancer;Toxoplasmosis			8	8	8	2.9	2.9	2.9	399.73	0	22.678	60665000	16	0.487334	1	4.58713	1.11956	sp|O15230|LAMA5_HUMAN	sp|O15230|LAMA5_HUMAN	349	O15230	LAMA5_HUMAN	Laminin subunit alpha-5		LAMA5
17.4596	16.1129	15.5578	18.5325	15.8746	1				cellular response to insulin stimulus;insulin receptor signaling pathway via phosphatidylinositol 3-kinase;intracellular protein transmembrane transport;positive regulation of glucose import in response to insulin stimulus;positive regulation of glucose transport;positive regulation of protein targeting to membrane;positive regulation of vesicle fusion;protein localization to plasma membrane;vesi…	calcium ion binding;calcium-dependent phospholipid binding	cell cortex;cytoplasmic vesicle membrane;cytosol;microtubule organizing center;plasma membrane;ruffle membrane				16	16	16	25.3	25.3	25.3	110.45	0	112.48	536130000	44	0.345664	1	4.57439	0.834048	sp|Q86YS7|C2CD5_HUMAN;tr|H0YFE9|H0YFE9_HUMAN;tr|H0YGU7|H0YGU7_HUMAN;tr|H0YFC4|H0YFC4_HUMAN	sp|Q86YS7|C2CD5_HUMAN	3271	Q86YS7	C2CD5_HUMAN	C2 domain-containing protein 5		C2CD5
18.2718	15.6925	19.058	19.5269	1	18.8862				cell cycle;cell division;double-strand break repair;double-strand break repair via nonhomologous end joining;histone H2A K63-linked deubiquitination;positive regulation of DNA repair;protein deubiquitination;protein K63-linked deubiquitination;response to ionizing radiation;response to X-ray;signal transduction involved in G2 DNA damage checkpoint	enzyme regulator activity;Lys63-specific deubiquitinase activity;metal ion binding;metallopeptidase activity;polyubiquitin modification-dependent protein binding;thiol-dependent ubiquitin-specific protease activity;thiol-dependent ubiquitinyl hydrolase activity	BRCA1-A complex;BRISC complex;cytoplasm;cytosol;nuclear ubiquitin ligase complex;nucleoplasm;nucleus;spindle pole;ubiquitin ligase complex	Homologous recombination;NOD-like receptor signaling pathway			3	3	3	13.6	13.6	13.6	36.072	0	8.564	77306000	7	0.299235	1	4.53644	0.736895	sp|P46736|BRCC3_HUMAN;tr|X6RJS7|X6RJS7_HUMAN;tr|A0A087WZR3|A0A087WZR3_HUMAN;tr|H9KVA9|H9KVA9_HUMAN;tr|A0A0D9SF50|A0A0D9SF50_HUMAN;tr|A0A0A0MS96|A0A0A0MS96_HUMAN	sp|P46736|BRCC3_HUMAN;tr|X6RJS7|X6RJS7_HUMAN;tr|A0A087WZR3|A0A087WZR3_HUMAN;tr|H9KVA9|H9KVA9_HUMAN;tr|A0A0D9SF50|A0A0D9SF50_HUMAN	1595	P46736	BRCC3_HUMAN	Lys-63-specific deubiquitinase BRCC36		BRCC3
15.9337	15.3595	15.1928	1	16.1962	15.6902				cell adhesion;N-acetylglucosamine biosynthetic process;N-acetylneuraminate metabolic process;UDP-N-acetylglucosamine metabolic process	ATP binding;hydrolase activity, hydrolyzing O-glycosyl compounds;metal ion binding;N-acylmannosamine kinase activity;UDP-N-acetylglucosamine 2-epimerase activity	cytoplasm;cytosol	Amino sugar and nucleotide sugar metabolism;Metabolic pathways			4	4	4	7.2	7.2	7.2	79.274	0	12.326	30166000	4	0.382091	1	4.53325	0.908785	sp|Q9Y223|GLCNE_HUMAN	sp|Q9Y223|GLCNE_HUMAN	5196	Q9Y223	GLCNE_HUMAN	Bifunctional UDP-N-acetylglucosamine 2-epimerase/N-acetylmannosamine kinase		GNE
15.0394	13.6279	15.0307	15.4701	13.654	1				calcium ion import;cell adhesion;negative regulation of cell-matrix adhesion;negative regulation of cellular response to growth factor stimulus;negative regulation of keratinocyte proliferation;negative regulation of wound healing;neurotransmitter secretion;positive regulation of calcium ion import;positive regulation of transcription from RNA polymerase II promoter	ATP binding;calmodulin binding;guanylate kinase activity;neurexin family protein binding;protein serine/threonine kinase activity	actin cytoskeleton;basement membrane;basolateral plasma membrane;cell-cell junction;ciliary membrane;cytoplasm;cytosol;focal adhesion;nuclear lamina;nuclear matrix;nucleolus;plasma membrane;presynaptic membrane;vesicle				6	6	6	8.3	8.3	8.3	105.12	0	7.0932	23663000	4	0.42175	1	4.52464	0.988976	sp|O14936|CSKP_HUMAN;tr|Q5JS79|Q5JS79_HUMAN;tr|Q5JS72|Q5JS72_HUMAN;tr|Q5JS74|Q5JS74_HUMAN	sp|O14936|CSKP_HUMAN;tr|Q5JS79|Q5JS79_HUMAN;tr|Q5JS72|Q5JS72_HUMAN;tr|Q5JS74|Q5JS74_HUMAN	311	O14936	CSKP_HUMAN	Peripheral plasma membrane protein CASK	CASK	CASK
18.9294	12.4699	19.4001	16.3741	1	19.8652				DNA damage checkpoint	ATP binding;protein serine/threonine kinase activity	intracellular membrane-bounded organelle;nucleoplasm				4	4	4	17.4	17.4	17.4	49.019	0	29.824	57167000	8	0.294912	1	4.52004	0.727724	tr|J3KN87|J3KN87_HUMAN;sp|O14757|CHK1_HUMAN;tr|E7EPP6|E7EPP6_HUMAN;tr|E9PJI4|E9PJI4_HUMAN;tr|E9PKQ3|E9PKQ3_HUMAN;tr|E9PM65|E9PM65_HUMAN;tr|E9PQW7|E9PQW7_HUMAN;tr|E9PPA5|E9PPA5_HUMAN	tr|J3KN87|J3KN87_HUMAN;sp|O14757|CHK1_HUMAN;tr|E7EPP6|E7EPP6_HUMAN;tr|E9PJI4|E9PJI4_HUMAN;tr|E9PKQ3|E9PKQ3_HUMAN	292	J3KN87	J3KN87_HUMAN			CHEK1
15.4304	14.6847	15.431	16.1382	1	14.8604				brown fat cell differentiation;cell adhesion;endodermal cell differentiation;epidermis development;extracellular matrix disassembly;extracellular matrix organization;hemidesmosome assembly	protein complex binding;structural molecule activity	extracellular region;laminin-5 complex	Amoebiasis;ECM-receptor interaction;Focal adhesion;Human papillomavirus infection;Pathways in cancer;PI3K-Akt signaling pathway;Small cell lung cancer;Toxoplasmosis			3	3	3	4.4	4.4	4.4	129.57	0	21.019	43145000	8	0.39274	1	4.51585	0.930428	sp|Q13751|LAMB3_HUMAN;tr|Q5THA1|Q5THA1_HUMAN	sp|Q13751|LAMB3_HUMAN	2407	Q13751	LAMB3_HUMAN	Laminin subunit beta-3		LAMB3
16.991	15.0137	1	17.5417	1	1				multicellular organism development	DNA binding transcription factor activity;sequence-specific DNA binding	nucleoplasm				3	3	2	12	12	8.7	27.502	0	7.0667	77568000	9	0.236443	1	4.48768	0.601106	tr|I3L3R1|I3L3R1_HUMAN;sp|P17481|HXB8_HUMAN;tr|I3L383|I3L383_HUMAN;sp|P31273|HXC8_HUMAN;tr|A0A0A0MSX5|A0A0A0MSX5_HUMAN;tr|V9GYH0|V9GYH0_HUMAN;tr|A0A0A0MTF4|A0A0A0MTF4_HUMAN;sp|Q00444|HXC5_HUMAN;sp|P17509|HXB6_HUMAN;sp|P31268|HXA7_HUMAN;sp|P31267|HXA6_HUMAN;sp|P09630|HXC6_HUMAN;sp|P17482|HXB9_HUMAN;sp|P31274|HXC9_HUMAN;sp|P09067|HXB5_HUMAN;sp|P20719|HXA5_HUMAN;sp|P13378|HXD8_HUMAN;tr|A0A087X222|A0…	tr|I3L3R1|I3L3R1_HUMAN;sp|P17481|HXB8_HUMAN;tr|I3L383|I3L383_HUMAN;sp|P31273|HXC8_HUMAN	1155	I3L3R1	I3L3R1_HUMAN
1	15.1185	14.5853	1	15.3805	1					GTP binding;GTPase activator activity;GTPase activity	mitochondrion;nucleolus;nucleus				9	9	9	12.3	12.3	12.3	108.53	0	21.862	112240000	13	0.266624	1	4.4411	0.667094	tr|J3KNM6|J3KNM6_HUMAN;tr|F8VVT9|F8VVT9_HUMAN;sp|Q99490|AGAP2_HUMAN;tr|H0YHB1|H0YHB1_HUMAN	tr|J3KNM6|J3KNM6_HUMAN;tr|F8VVT9|F8VVT9_HUMAN;sp|Q99490|AGAP2_HUMAN	4066	J3KNM6	J3KNM6_HUMAN			AGAP2
1	15.0567	15.3639	1	1	16.133				negative regulation of transcription, DNA-templated;positive regulation of transcription from RNA polymerase II promoter	RNA binding;RNA polymerase II proximal promoter sequence-specific DNA binding;transcriptional activator activity, RNA polymerase II proximal promoter sequence-specific DNA binding	nucleolus;nucleus				3	3	3	4.6	4.6	4.6	77.672	0.0019324	3.1002	9349500	0	0.254168	1	4.42922	0.640036	sp|O15226|NKRF_HUMAN;tr|A0A087WXT2|A0A087WXT2_HUMAN	sp|O15226|NKRF_HUMAN	347	O15226	NKRF_HUMAN	NF-kappa-B-repressing factor	FkB-repressing factor	NKRF
1	15.6621	15.6452	17.0445	1	1				cell adhesion;cellular response to DNA damage stimulus;embryonic cleavage;negative regulation of amyloid precursor protein biosynthetic process;negative regulation of apoptotic process;negative regulation of reactive oxygen species metabolic process;negative regulation of superoxide anion generation;positive regulation of transcription from RNA polymerase II promoter;regulation of mitotic cell cy…	DNA binding transcription factor activity;leucine zipper domain binding;RNA binding;tau protein binding	cytoplasm;Golgi apparatus;nucleolus;nucleus				8	8	8	22.1	22.1	22.1	63.132	0	52.444	217520000	26	0.240639	1	4.42094	0.61037	sp|Q9NY61|AATF_HUMAN;tr|A0A087WWS8|A0A087WWS8_HUMAN;tr|A0A087WTH8|A0A087WTH8_HUMAN;tr|A0A087WW41|A0A087WW41_HUMAN	sp|Q9NY61|AATF_HUMAN	4845	Q9NY61	AATF_HUMAN	Protein AATF		AATF
16.0779	15.1437	14.5523	1	15.8825	15.7067				translation	GTP binding;GTPase activity	mitochondrial inner membrane				12	12	12	27.5	27.5	27.5	74.327	0	108.82	278570000	32	0.371679	1	4.39488	0.88754	sp|Q8N442|GUF1_HUMAN	sp|Q8N442|GUF1_HUMAN	3395	Q8N442	GUF1_HUMAN	Translation factor GUF1, mitochondrial {ECO:0000255|HAMAP-Rule:MF_03137}		GUF1
15.4391	15.736	15.9536	17.5489	15.3998	1				anion transmembrane transport;signal transduction;transmembrane transport	volume-sensitive anion channel activity	cytoplasm;endoplasmic reticulum membrane;integral component of plasma membrane;ion channel complex;plasma membrane				4	4	4	8.2	8.2	8.2	90.246	0	9.7695	30033000	4	0.351104	1	4.39332	0.845284	sp|Q6NSJ5|LRC8E_HUMAN;tr|M0R2K8|M0R2K8_HUMAN;tr|M0R2D8|M0R2D8_HUMAN;tr|M0QZ48|M0QZ48_HUMAN	sp|Q6NSJ5|LRC8E_HUMAN	2974	Q6NSJ5	LRC8E_HUMAN	Volume-regulated anion channel subunit LRRC8E		LRRC8E
17.2807	16.0704	16.4651	19.4892	16.1575	1				cell cycle arrest;cellular response to transforming growth factor beta stimulus;dephosphorylation;negative regulation of BMP signaling pathway;negative regulation of I-kappaB kinase/NF-kappaB signaling;negative regulation of NF-kappaB import into nucleus;negative regulation of SMAD protein complex assembly;negative regulation of transcription from RNA polymerase II promoter;negative regulation of…	calmodulin-dependent protein phosphatase activity;magnesium ion binding;manganese ion binding;protein serine/threonine phosphatase activity;R-SMAD binding;signal transducer activity	cytosol;membrane;nucleoplasm;nucleus;plasma membrane	MAPK signaling pathway			4	2	2	11	5.2	5.2	42.447	0.0010087	3.6868	72206000	3	0.314941	1	4.3898	0.770029	sp|P35813|PPM1A_HUMAN;tr|E9PKB5|E9PKB5_HUMAN;tr|E9PL75|E9PL75_HUMAN;tr|E9PJN3|E9PJN3_HUMAN	sp|P35813|PPM1A_HUMAN;tr|E9PKB5|E9PKB5_HUMAN;tr|E9PL75|E9PL75_HUMAN;tr|E9PJN3|E9PJN3_HUMAN	1474	P35813	PPM1A_HUMAN	Protein phosphatase 1A		PPM1A
16.5699	14.796	1	1	17.3559	1				blastocyst formation;cytoplasmic translation;maturation of LSU-rRNA from tricistronic rRNA transcript (SSU-rRNA, 5.8S rRNA, LSU-rRNA)	RNA binding;structural constituent of ribosome	cytosolic large ribosomal subunit;nucleolus				5	5	1	21.5	21.5	4.5	28.661	0	10.076	72344000	16	0.231644	1	4.3367	0.590475	sp|Q6DKI1|RL7L_HUMAN	sp|Q6DKI1|RL7L_HUMAN	2945	Q6DKI1	RL7L_HUMAN	60S ribosomal protein L7-like 1		RPL7L1
15.0374	13.2916	16.145	15.7016	14.8062	1				transcription from RNA polymerase II promoter	DNA binding;DNA-directed 5'-3' RNA polymerase activity	nucleus				4	4	4	4.8	4.8	4.8	152.75	0.0010028	3.5986	22015000	3	0.375226	1	4.32205	0.894787	sp|Q9BWH6|RPAP1_HUMAN;tr|H3BRE8|H3BRE8_HUMAN	sp|Q9BWH6|RPAP1_HUMAN;tr|H3BRE8|H3BRE8_HUMAN	4280	Q9BWH6	RPAP1_HUMAN	RNA polymerase II-associated protein 1		RPAP1
1	13.9778	18.1481	1	1	18.3004										3	3	3	8.5	8.5	8.5	63.569	0	9.5934	85618000	9	0.214568	1	4.27518	0.552311	tr|H0YE03|H0YE03_HUMAN;tr|H7C3G7|H7C3G7_HUMAN;sp|Q2TBE0|C19L2_HUMAN	tr|H0YE03|H0YE03_HUMAN;tr|H7C3G7|H7C3G7_HUMAN;sp|Q2TBE0|C19L2_HUMAN	2726	H0YE03	H0YE03_HUMAN			CWF19L2
17.625	14.5193	16.3479	17.8009	1	17.1123				mRNA splicing, via spliceosome	RNA binding;zinc ion binding	catalytic step 2 spliceosome;nuclear body;nucleoplasm;nucleus				4	4	4	9.2	9.2	9.2	78.576	0	7.2709	51256000	7	0.307223	1	4.19302	0.753784	sp|Q6NZY4|ZCHC8_HUMAN;tr|F5H803|F5H803_HUMAN;tr|F5H6J5|F5H6J5_HUMAN;tr|F5GX80|F5GX80_HUMAN;tr|F5GXQ6|F5GXQ6_HUMAN	sp|Q6NZY4|ZCHC8_HUMAN;tr|F5H803|F5H803_HUMAN;tr|F5H6J5|F5H6J5_HUMAN;tr|F5GX80|F5GX80_HUMAN;tr|F5GXQ6|F5GXQ6_HUMAN	2992	Q6NZY4	ZCHC8_HUMAN	Zinc finger CCHC domain-containing protein 8		ZCCHC8
17.3648	14.6664	16.2523	17.4715	1	17.3047						mitochondrion				6	6	6	18.8	18.8	18.8	37.001	0	17.787	59769000	14	0.30801	1	4.16909	0.755442	sp|Q3SXM5|HSDL1_HUMAN;tr|H3BQI7|H3BQI7_HUMAN;tr|H3BT52|H3BT52_HUMAN;tr|H3BNH5|H3BNH5_HUMAN	sp|Q3SXM5|HSDL1_HUMAN	2742	Q3SXM5	HSDL1_HUMAN	Inactive hydroxysteroid dehydrogenase-like protein 1		HSDL1
19.063	16.0084	16.9166	19.5915	1	18.8999				glutaminyl-tRNAGln biosynthesis via transamidation;mitochondrial translation	ATP binding;glutaminyl-tRNA synthase (glutamine-hydrolyzing) activity	glutamyl-tRNA(Gln) amidotransferase complex;mitochondrion				5	5	5	14.9	14.9	14.9	57.653	0	35.918	72352000	9	0.271247	1	4.16553	0.67708	tr|D6REA0|D6REA0_HUMAN;sp|O75879|GATB_HUMAN;tr|D6RDU9|D6RDU9_HUMAN	tr|D6REA0|D6REA0_HUMAN;sp|O75879|GATB_HUMAN;tr|D6RDU9|D6RDU9_HUMAN	642	D6REA0	D6REA0_HUMAN	Glutamyl-tRNA(Gln) amidotransferase subunit B, mitochondrial {ECO:0000256|HAMAP-Rule:MF_03147}	lu-AdT subunit B {ECO:0000256|HAMAP-Rule:MF_03147}
1	13.3062	14.9081	1	1	14.7469				cell division;cellular response to DNA damage stimulus;cellular senescence;double-strand break repair via homologous recombination;positive regulation of chromosome segregation;positive regulation of maintenance of mitotic sister chromatid cohesion;sister chromatid cohesion;telomere maintenance via recombination	ATP binding	cell junction;chromosome, telomeric region;interchromatin granule;nuclear speck;nucleoplasm;nucleus;PML body;sex chromosome;site of double-strand break;Smc5-Smc6 complex				4	4	4	3.9	3.9	3.9	128.81	0	7.3122	14520000	2	0.260877	1	4.1558	0.65464	sp|Q8IY18|SMC5_HUMAN	sp|Q8IY18|SMC5_HUMAN	3329	Q8IY18	SMC5_HUMAN	Structural maintenance of chromosomes protein 5	MC protein 5;MC-5;SMC5	SMC5
13.5828	17.7852	14.963	15.0849	17.8609	1				defense response to virus;innate immune response;positive regulation of MDA-5 signaling pathway;positive regulation of RIG-I signaling pathway;response to virus	ATP binding;double-stranded DNA binding;double-stranded RNA binding;helicase activity;single-stranded RNA binding	cytoplasm;cytosol;intermediate filament cytoskeleton				24	24	23	18.6	18.6	17.8	197.85	0	81.636	505400000	63	0.314762	1	4.12842	0.769651	sp|Q8IY21|DDX60_HUMAN;tr|H0Y8Z7|H0Y8Z7_HUMAN;tr|D6R944|D6R944_HUMAN	sp|Q8IY21|DDX60_HUMAN	3330	Q8IY21	DDX60_HUMAN	Probable ATP-dependent RNA helicase DDX60		DDX60
17.3144	14.1829	15.313	17.041	16.4375	1				blood coagulation;regulation of protein kinase A signaling	protein kinase A regulatory subunit binding;RNA binding	cytosol;integral component of membrane;membrane;mitochondrial outer membrane;mitochondrion				4	4	4	6.6	6.6	6.6	97.34	0	8.2967	40627000	3	0.315604	1	4.11057	0.771421	sp|Q92667|AKAP1_HUMAN;tr|I3L0W0|I3L0W0_HUMAN;tr|I3L3K1|I3L3K1_HUMAN;tr|I3L364|I3L364_HUMAN;tr|I3L0K6|I3L0K6_HUMAN;tr|I3L2A2|I3L2A2_HUMAN;tr|I3L2N7|I3L2N7_HUMAN;tr|I3NI36|I3NI36_HUMAN	sp|Q92667|AKAP1_HUMAN;tr|I3L0W0|I3L0W0_HUMAN	3700	Q92667	AKAP1_HUMAN	A-kinase anchor protein 1, mitochondrial		AKAP1
16.8311	14.342	16.3775	17.2192	1	17.1352				adaptive immune response;immune response;mucosal immune response;negative regulation of I-kappaB kinase/NF-kappaB signaling;negative regulation of interleukin-8 production;negative regulation of protein localization to nucleus;negative regulation of transcription from RNA polymerase II promoter;protein deubiquitination;protein deubiquitination involved in ubiquitin-dependent protein catabolic pro…	cysteine-type peptidase activity;DNA binding;K63-linked polyubiquitin modification-dependent protein binding;Lys48-specific deubiquitinase activity;thiol-dependent ubiquitin-specific protease activity;thiol-dependent ubiquitinyl hydrolase activity;zinc ion binding	cytoplasm;cytosol;nucleus				3	3	3	5.2	5.2	5.2	92.525	0	11.725	33022000	6	0.303737	1	4.0654	0.746423	sp|Q6GQQ9|OTU7B_HUMAN;tr|Q5SZ59|Q5SZ59_HUMAN;sp|Q8TE49|OTU7A_HUMAN	sp|Q6GQQ9|OTU7B_HUMAN;tr|Q5SZ59|Q5SZ59_HUMAN	2954	Q6GQQ9	OTU7B_HUMAN	OTU domain-containing protein 7B		OTUD7B
14.7954	13.8466	14.2453	15.4113	1	14.3047				inflammatory response;negative regulation of MHC class II biosynthetic process;negative regulation of transcription from RNA polymerase II promoter;transcription from RNA polymerase II promoter;viral process	DNA binding transcription factor activity;ligase activity;RNA binding;RNA polymerase II regulatory region sequence-specific DNA binding;transcriptional repressor activity, RNA polymerase II proximal promoter sequence-specific DNA binding;zinc ion binding	cytosol;nucleolus;nucleus;plasma membrane	Human papillomavirus infection			1	1	1	1.7	1.7	1.7	124.39	0	5.6655	10377000	3	0.365386	1	4.05711	0.874656	sp|Q12986|NFX1_HUMAN	sp|Q12986|NFX1_HUMAN	2291	Q12986	NFX1_HUMAN	Transcriptional repressor NF-X1		NFX1
13.8341	12.7189	13.1362	13.9937	12.7962	1					ubiquitin-protein transferase activity					3	3	3	1	1	1	484.35	0	20.472	41868000	6	0.404251	1	3.9664	0.953728	tr|J3KPF0|J3KPF0_HUMAN;sp|Q9Y4D8|HECD4_HUMAN;tr|F8VWT9|F8VWT9_HUMAN	tr|J3KPF0|J3KPF0_HUMAN;sp|Q9Y4D8|HECD4_HUMAN;tr|F8VWT9|F8VWT9_HUMAN	5586	J3KPF0	J3KPF0_HUMAN			HECTD4
19.4842	11.1762	16.3935	17.5005	1	16.8798					DNA binding;transcription coactivator activity	cytosol;nucleoplasm				1	1	1	4.4	4.4	4.4	51.233	0	10.353	16917000	2	0.262154	1	3.89121	0.657413	tr|Q5JTV1|Q5JTV1_HUMAN;sp|Q9UKD1|GMEB2_HUMAN	tr|Q5JTV1|Q5JTV1_HUMAN;sp|Q9UKD1|GMEB2_HUMAN	5084	Q5JTV1	Q5JTV1_HUMAN
16.5736	18.0273	20.942	21.6558	1	21.3492						intracellular				5	5	5	18.8	18.8	18.8	49.193	0	8.978	259760000	4	0.214889	1	3.84599	0.553033	tr|M0R366|M0R366_HUMAN;sp|Q9BTV5|FSD1_HUMAN;tr|M0R1R0|M0R1R0_HUMAN;tr|M0R2F6|M0R2F6_HUMAN	tr|M0R366|M0R366_HUMAN;sp|Q9BTV5|FSD1_HUMAN	4213	M0R366	M0R366_HUMAN			FSD1
13.0081	12.1722	13.247	13.3529	12.5491	1				positive regulation of canonical Wnt signaling pathway;protein deubiquitination;protein K48-linked deubiquitination;ubiquitin-dependent protein catabolic process;Wnt signaling pathway	cysteine-type endopeptidase activity;thiol-dependent ubiquitin-specific protease activity;thiol-dependent ubiquitinyl hydrolase activity	cytosol				3	3	3	1.5	1.5	1.5	404.23	0.00061589	4.0465	13178000	1	0.407136	1	3.84175	0.959551	sp|Q70CQ2|UBP34_HUMAN;tr|A0A0C4DG73|A0A0C4DG73_HUMAN;tr|H7C150|H7C150_HUMAN;tr|H7C183|H7C183_HUMAN	sp|Q70CQ2|UBP34_HUMAN;tr|A0A0C4DG73|A0A0C4DG73_HUMAN	3096	Q70CQ2	UBP34_HUMAN	Ubiquitin carboxyl-terminal hydrolase 34		USP34
15.086	14.4054	1	16.9763	1	1				cilium assembly;determination of left/right symmetry;heart development;intraciliary transport involved in cilium assembly;keratinocyte development;negative regulation of epithelial cell proliferation;non-motile cilium assembly;Notch signaling pathway;positive regulation of cell adhesion mediated by integrin;positive regulation of transcription from RNA polymerase II promoter	beta-tubulin binding;chromatin binding	centrosome;ciliary tip;cilium;cytoplasmic vesicle;intraciliary transport particle B;motile cilium;nucleus				2	2	2	4.5	4.5	4.5	69.239	0.001359	3.1796	12473000	1	0.211835	1	3.83836	0.546152	sp|Q96LB3|IFT74_HUMAN	sp|Q96LB3|IFT74_HUMAN	3967	Q96LB3	IFT74_HUMAN	Intraflagellar transport protein 74 homolog		IFT74
14.2773	12.4824	1	1	14.2926	1				negative regulation of angiogenesis;negative regulation of cell proliferation;negative regulation of vascular endothelial growth factor receptor signaling pathway;positive regulation of apoptotic process;reelin-mediated signaling pathway	GTPase activator activity					10	9	9	17	16.4	16.4	118.06	0	28.919	96943000	18	0.249114	1	3.82237	0.628988	tr|H0Y3A3|H0Y3A3_HUMAN;sp|Q5VWQ8|DAB2P_HUMAN	tr|H0Y3A3|H0Y3A3_HUMAN;sp|Q5VWQ8|DAB2P_HUMAN	2905	H0Y3A3	H0Y3A3_HUMAN			DAB2IP
18.7044	18.8283	18.3889	17.0607	12.5616	14.8842						cytoskeleton				18	18	18	13.1	13.1	13.1	204.49	0	78.548	375690000	31	1.36169	1	3.80508	2.9145	tr|K7EKI8|K7EKI8_HUMAN;sp|O60437|PEPL_HUMAN;tr|K7EQ71|K7EQ71_HUMAN	tr|K7EKI8|K7EKI8_HUMAN;sp|O60437|PEPL_HUMAN;tr|K7EQ71|K7EQ71_HUMAN	493	K7EKI8	K7EKI8_HUMAN			PPL
15.3722	13.5305	16.7564	17.1849	1	16.7138				negative regulation of protein ubiquitination;protein deubiquitination;protein localization to cell surface;regulation of protein stability;spliceosomal tri-snRNP complex assembly;ubiquitin-dependent protein catabolic process	adenosine receptor binding;identical protein binding;metal ion binding;thiol-dependent ubiquitin-specific protease activity;thiol-dependent ubiquitinyl hydrolase activity	cytoplasm;cytosol;lysosome;nucleus;plasma membrane				9	7	7	14.3	11.9	11.9	108.56	0	13.46	25371000	7	0.265319	1	3.58682	0.664271	sp|Q13107|UBP4_HUMAN;tr|H7C189|H7C189_HUMAN;tr|C9JNU9|C9JNU9_HUMAN	sp|Q13107|UBP4_HUMAN;tr|H7C189|H7C189_HUMAN	2305	Q13107	UBP4_HUMAN	Ubiquitin carboxyl-terminal hydrolase 4		USP4
18.7443	13.1321	16.7406	18.7635	1	18.2596				fatty acid elongation, saturated fatty acid;very long-chain fatty acid biosynthetic process	3-oxo-arachidoyl-CoA synthase activity;3-oxo-cerotoyl-CoA synthase activity;3-oxo-lignoceronyl-CoA synthase activity;fatty acid elongase activity;very-long-chain 3-ketoacyl-CoA synthase activity	endoplasmic reticulum;integral component of membrane				1	1	1	5	5	5	30.742	0	21.123	82285000	9	0.227918	1	3.53128	0.582193	tr|A0A0A0MTI6|A0A0A0MTI6_HUMAN;sp|Q9NYP7|ELOV5_HUMAN	tr|A0A0A0MTI6|A0A0A0MTI6_HUMAN;sp|Q9NYP7|ELOV5_HUMAN	4856	A0A0A0MTI6	A0A0A0MTI6_HUMAN	Elongation of very long chain fatty acids protein {ECO:0000256|RuleBase:RU361115}
14.1246	13.7404	1	16.3011	1	1				cellular response to DNA damage stimulus;DNA metabolic process;DNA repair;DNA replication;DNA replication initiation;mitotic DNA replication checkpoint;mitotic G2 DNA damage checkpoint;regulation of signal transduction by p53 class mediator;response to ionizing radiation	DNA binding;identical protein binding;protein C-terminus binding	actin cytoskeleton;chromosome;condensed nuclear chromosome;cytoplasm;male germ cell nucleus;microtubule organizing center;nuclear body;nucleoplasm;nucleus;PML body;spindle pole	Homologous recombination			4	4	4	4.6	4.6	4.6	170.68	0	8.9975	35212000	8	0.203474	1	3.52129	0.527216	sp|Q92547|TOPB1_HUMAN	sp|Q92547|TOPB1_HUMAN	3678	Q92547	TOPB1_HUMAN	DNA topoisomerase 2-binding protein 1		TOPBP1
14.73	15.9807	16.9338	19.6614	1	17.4044				actin filament organization;antigen receptor-mediated signaling pathway;B cell receptor signaling pathway;cell adhesion;cell chemotaxis;cell division;cell migration;cell proliferation;cellular response to hepatocyte growth factor stimulus;epidermal growth factor receptor signaling pathway;G-protein coupled receptor signaling pathway;hepatocyte growth factor receptor signaling pathway;insulin rece…	protein kinase binding;SH3 domain binding;signal transducer activity	actin cytoskeleton;cytoplasm;cytosol;focal adhesion;lamellipodium;ruffle	Bacterial invasion of epithelial cells;Chemokine signaling pathway;Focal adhesion;Human cytomegalovirus infection;Leukocyte transendothelial migration;Rap1 signaling pathway;Regulation of actin cytoskeleton;Yersinia infection			6	6	6	12.5	12.5	12.5	93.371	0	12.721	56682000	7	0.209019	1	3.19287	0.53979	sp|P56945|BCAR1_HUMAN;tr|H3BN62|H3BN62_HUMAN	sp|P56945|BCAR1_HUMAN	1872	P56945	BCAR1_HUMAN	Breast cancer anti-estrogen resistance protein 1		BCAR1
17.0628	23.75	17.3191	14.7104	16.7382	17.1773				7-methylguanosine mRNA capping;DNA repair;global genome nucleotide-excision repair;nucleotide-excision repair, DNA duplex unwinding;nucleotide-excision repair, DNA incision;nucleotide-excision repair, DNA incision, 3'-to lesion;nucleotide-excision repair, DNA incision, 5'-to lesion;nucleotide-excision repair, preincision complex assembly;nucleotide-excision repair, preincision complex stabilizati…	chromatin binding	core TFIIH complex;holo TFIIH complex;nucleoplasm	Basal transcription factors;Nucleotide excision repair;Viral carcinogenesis			14	14	14	40.3	40.3	40.3	62.031	0	201.2	1005600000	53	0.614318	1	3.16866	1.36829	sp|P32780|TF2H1_HUMAN;tr|E9PM51|E9PM51_HUMAN;tr|E9PI26|E9PI26_HUMAN;tr|E9PL58|E9PL58_HUMAN;tr|F5H0Y9|F5H0Y9_HUMAN	sp|P32780|TF2H1_HUMAN	1427	P32780	TF2H1_HUMAN	General transcription factor IIH subunit 1		GTF2H1
19.8849	18.1711	19.3074	17.8145	13.6773	16.4664				cellular response to insulin stimulus;Golgi to plasma membrane protein transport;neutrophil degranulation;phagosome maturation;receptor internalization;regulated exocytosis	GDP binding;GTP binding;GTPase activity	cytosol;early endosome;early endosome membrane;phagocytic vesicle;phagocytic vesicle membrane;plasma membrane;secretory granule membrane;trans-Golgi network membrane	Endocytosis			3	3	1	18	18	6.7	21.569	0.0002164	5.1643	46473000	2	1.11849	1	3.13508	2.3784	sp|Q13636|RAB31_HUMAN;tr|J3QR51|J3QR51_HUMAN	sp|Q13636|RAB31_HUMAN;tr|J3QR51|J3QR51_HUMAN	2399	Q13636	RAB31_HUMAN	Ras-related protein Rab-31		RAB31
16.1602	11.745	15.7538	18.1665	1	15.6697				signal transduction		cytosol;perinuclear region of cytoplasm				6	6	6	13	13	13	76.992	0	11.508	43229000	8	0.2052	1	2.94092	0.531137	sp|Q8IUC4|RHPN2_HUMAN;sp|A8MT19|RHN2P_HUMAN	sp|Q8IUC4|RHPN2_HUMAN	3275	Q8IUC4	RHPN2_HUMAN	Rhophilin-2		RHPN2
20.1683	18.766	20.0487	18.3894	14.8719	17.6662				antimicrobial humoral response;cell morphogenesis;central nervous system myelin maintenance;chaperone-mediated protein complex assembly;chaperone-mediated protein folding;chaperone-mediated protein transport involved in chaperone-mediated autophagy;complement activation;complement activation, classical pathway;innate immune response;intrinsic apoptotic signaling pathway;lipid metabolic process;mi…	amyloid-beta binding;chaperone binding;low-density lipoprotein particle receptor binding;misfolded protein binding;protein complex binding;ubiquitin protein ligase binding	apical dendrite;blood microparticle;cell surface;chromaffin granule;cytoplasm;cytosol;endoplasmic reticulum;extracellular exosome;extracellular matrix;extracellular region;extracellular space;Golgi apparatus;intracellular;mitochondrial membrane;mitochondrion;neurofibrillary tangle;nucleus;perinuclear region of cytoplasm;platelet alpha granule lumen;protein complex;spherical high-density lipoprote…	Complement and coagulation cascades			5	5	5	16.9	16.9	16.9	52.494	0	19.259	111170000	13	1.08584	1	2.68521	2.30963	sp|P10909|CLUS_HUMAN;tr|H0YAS8|H0YAS8_HUMAN;tr|H0YC35|H0YC35_HUMAN;tr|E7ERK6|E7ERK6_HUMAN;tr|H0YLK8|H0YLK8_HUMAN	sp|P10909|CLUS_HUMAN;tr|H0YAS8|H0YAS8_HUMAN;tr|H0YC35|H0YC35_HUMAN	1030	P10909	CLUS_HUMAN	Clusterin		CLU
22.9532	21.0376	1	1	18.368	17.6484				cellular respiration;mitochondrial electron transport, NADH to ubiquinone;mitochondrial respiratory chain complex I assembly;response to drug;response to hydroperoxide;response to organic cyclic compound	NADH dehydrogenase (ubiquinone) activity	dendrite;integral component of membrane;mitochondrial inner membrane;mitochondrial membrane;mitochondrial respiratory chain complex I;neuronal cell body	Metabolic pathways;Oxidative phosphorylation;Parkinson disease;Retrograde endocannabinoid signaling;Thermogenesis			2	2	2	8.5	8.5	8.5	35.66	0	32.816	92478000	6	0.106221	1	2.65812	0.294494	sp|P03886|NU1M_HUMAN	sp|P03886|NU1M_HUMAN	857	P03886	NU1M_HUMAN	NADH-ubiquinone oxidoreductase chain 1		MT-ND1
20.2042	18.9195	19.8764	17.1129	16.79	17.1493				apoptotic DNA fragmentation;DNA metabolic process;erythrocyte differentiation	deoxyribonuclease II activity;DNA binding	extracellular exosome;intracellular;lysosome	Lysosome			4	4	4	17.5	17.5	17.5	39.58	0	9.0516	64232000	6	2.56162	1	2.64931	6.59139	sp|O00115|DNS2A_HUMAN;tr|K7ENE5|K7ENE5_HUMAN	sp|O00115|DNS2A_HUMAN;tr|K7ENE5|K7ENE5_HUMAN	198	O00115	DNS2A_HUMAN	Deoxyribonuclease-2-alpha		DNASE2
24.9618	21.0217	23.9334	19.5051	19.0684	23.5702				histone H3-K27 trimethylation;histone H3-K4 trimethylation;negative regulation of transcription from RNA polymerase II promoter;nucleosome assembly;nucleosome positioning	ADP binding;AMP binding;ATP binding;calcium ion binding;chromatin DNA binding;dATP binding;double-stranded DNA binding;GTP binding;RNA binding	extracellular exosome;nuclear heterochromatin;nuclear nucleosome;nucleus				7	1	1	26.5	7.3	7.3	21.865	0	9.0386	3462200000	15	0.628356	1	2.59104	1.39563	sp|P10412|H14_HUMAN;sp|P16402|H13_HUMAN;sp|P22492|H1T_HUMAN;sp|Q02539|H11_HUMAN;sp|P16401|H15_HUMAN	sp|P10412|H14_HUMAN;sp|P16402|H13_HUMAN	1017	P10412	H14_HUMAN	Histone H1.4		HIST1H1E
21.5709	20.9526	21.2066	19.0589	18.4936	18.8804				chromatin silencing;covalent chromatin modification;dosage compensation;establishment of protein localization to chromatin;negative regulation of cell cycle G2/M phase transition;negative regulation of gene expression, epigenetic;negative regulation of histone H3-K27 methylation;negative regulation of histone H3-K4 methylation;negative regulation of histone phosphorylation;negative regulation of …	chromatin DNA binding;core promoter sequence-specific DNA binding;DNA binding;double-stranded methylated DNA binding;enzyme binding;nucleosomal DNA binding;protein heterodimerization activity;protein kinase binding;protein serine/threonine kinase inhibitor activity;rDNA binding;RNA polymerase II core promoter sequence-specific DNA binding;RNA polymerase II regulatory region sequence-specific DNA …	Barr body;condensed chromosome;extracellular exosome;nuclear chromatin;nuclear chromosome;nuclear chromosome, telomeric region;nucleolus;nucleosome;nucleus;pericentric heterochromatin;sex chromatin	Alcoholism;Necroptosis;Systemic lupus erythematosus			12	12	10	43	43	36	39.617	0	80.332	872350000	108	3.23787	1	2.43237	9.92656	sp|O75367|H2AY_HUMAN;tr|B4DJC3|B4DJC3_HUMAN;tr|D6RCF2|D6RCF2_HUMAN	sp|O75367|H2AY_HUMAN;tr|B4DJC3|B4DJC3_HUMAN	573	O75367	H2AY_HUMAN	Core histone macro-H2A.1	H2A1;istone macroH2A1	H2AFY
20.1127	20.2243	20.0126	17.5156	15.975	19.5914				antigen processing and presentation of endogenous peptide antigen via MHC class I		integral component of membrane				3	3	3	7.4	7.4	7.4	47.606	0	7.4275	89616000	9	1.08516	1	2.42258	2.30821	tr|A0A0G2JKZ1|A0A0G2JKZ1_HUMAN;sp|O15533|TPSN_HUMAN;tr|A2AB90|A2AB90_HUMAN;tr|A0A0G2JH37|A0A0G2JH37_HUMAN;tr|A0A0A0MSV9|A0A0A0MSV9_HUMAN;tr|Q6P1N7|Q6P1N7_HUMAN;tr|C9JA35|C9JA35_HUMAN;tr|A0A0A0MT98|A0A0A0MT98_HUMAN	tr|A0A0G2JKZ1|A0A0G2JKZ1_HUMAN;sp|O15533|TPSN_HUMAN;tr|A2AB90|A2AB90_HUMAN;tr|A0A0G2JH37|A0A0G2JH37_HUMAN;tr|A0A0A0MSV9|A0A0A0MSV9_HUMAN;tr|Q6P1N7|Q6P1N7_HUMAN;tr|C9JA35|C9JA35_HUMAN	384	A0A0G2JKZ1	A0A0G2JKZ1_HUMAN			TAPBP
19.3901	1	19.6924	14.3026	1	17.5812				proteolysis involved in cellular protein catabolic process	serine-type carboxypeptidase activity	extracellular exosome				6	6	6	15.1	15.1	15.1	54.163	0	17.935	54619000	9	0.108461	1	2.3996	0.300166	sp|Q9H3G5|CPVL_HUMAN;tr|H7C0X5|H7C0X5_HUMAN;tr|A0A087WVP6|A0A087WVP6_HUMAN;tr|H7C218|H7C218_HUMAN;tr|A0A087WXJ9|A0A087WXJ9_HUMAN;tr|C9JLV0|C9JLV0_HUMAN;tr|C9J6L4|C9J6L4_HUMAN;tr|C9JI22|C9JI22_HUMAN	sp|Q9H3G5|CPVL_HUMAN;tr|H7C0X5|H7C0X5_HUMAN;tr|A0A087WVP6|A0A087WVP6_HUMAN	4443	Q9H3G5	CPVL_HUMAN	Probable serine carboxypeptidase CPVL		CPVL
25.2993	21.7551	20.6084	21.1699	21.5071	18.0916				cytoplasmic translation;nuclear-transcribed mRNA catabolic process, nonsense-mediated decay;positive regulation of protein kinase activity;rRNA processing;SRP-dependent cotranslational protein targeting to membrane;translation;translational elongation;translational initiation;viral transcription	protein kinase activator activity;structural constituent of ribosome	cytosol;cytosolic large ribosomal subunit;extracellular exosome;focal adhesion	Ribosome			3	3	3	74.6	74.6	74.6	11.514	0	32.066	207120000	5	0.574106	1	2.29807	1.28986	sp|P05386|RLA1_HUMAN	sp|P05386|RLA1_HUMAN	901	P05386	RLA1_HUMAN	60S acidic ribosomal protein P1		RPLP1
29.9701	28.5271	28.2377	27.0452	26.3196	26.5838				chromatin silencing	DNA binding;protein heterodimerization activity	extracellular exosome;nuclear chromatin;nucleosome;nucleus	Alcoholism;Necroptosis;Systemic lupus erythematosus			6	6	1	55	55	22.5	13.988	0	188.2	51158000000	334	1.76541	1	2.26211	3.92586	sp|Q16777|H2A2C_HUMAN;sp|Q6FI13|H2A2A_HUMAN;sp|Q96QV6|H2A1A_HUMAN;REV__tr|H0Y672|H0Y672_HUMAN;REV__tr|E7EQ67|E7EQ67_HUMAN;REV__tr|H7BY63|H7BY63_HUMAN	sp|Q16777|H2A2C_HUMAN;sp|Q6FI13|H2A2A_HUMAN;sp|Q96QV6|H2A1A_HUMAN	2695	Q16777	H2A2C_HUMAN	Histone H2A type 2-C		HIST2H2AC
22.4225	18.5126	21.7509	19.7052	15.3529	20.9836				mitochondrial translational elongation;mitochondrial translational termination;translation	RNA binding;structural constituent of ribosome	mitochondrial inner membrane;mitochondrial large ribosomal subunit;mitochondrial ribosome	Ribosome			3	3	3	19.1	19.1	19.1	21.405	0	71.999	151790000	15	0.457551	1	2.21479	1.06052	sp|Q9BYC8|RM32_HUMAN	sp|Q9BYC8|RM32_HUMAN	4308	Q9BYC8	RM32_HUMAN	39S ribosomal protein L32, mitochondrial	32mt;RP-L32	MRPL32
20.4389	18.5604	19.7007	15.9336	16.9353	19.2623				aging;ATP-dependent chromatin remodeling;cellular protein complex assembly;cellular response to organic cyclic compound;chromatin silencing at rDNA;embryonic organ development;heart development;maternal behavior;methylation-dependent chromatin silencing;negative regulation of transcription from RNA polymerase II promoter;negative regulation of transcription, DNA-templated;positive regulation of c…	C2H2 zinc finger domain binding;chromatin binding;methyl-CpG binding;mRNA binding;protein domain specific binding;satellite DNA binding;siRNA binding	cytosol;heterochromatin;histone deacetylase complex;nuclear chromatin;nucleoplasm;nucleus;protein complex				7	7	7	25.1	25.1	25.1	43.254	0	51.616	160020000	22	0.906471	1	2.18962	1.94243	sp|Q9UBB5|MBD2_HUMAN;tr|X6RBL6|X6RBL6_HUMAN	sp|Q9UBB5|MBD2_HUMAN	4947	Q9UBB5	MBD2_HUMAN	Methyl-CpG-binding domain protein 2		MBD2
16.5227	17.4276	17.3052	15.5019	14.1477	15.1272				attachment of mitotic spindle microtubules to kinetochore;protein localization to kinetochore;protein localization to microtubule;sister chromatid biorientation	metal ion binding;nucleic acid binding	condensed chromosome;condensed chromosome kinetochore;cytoplasm;nuclear body;nucleoplasm;nucleus;spindle				11	11	11	17	17	17	89.098	0	35.168	255950000	30	1.92466	1	2.15956	4.37792	sp|Q96JM3|CHAP1_HUMAN;tr|S4R3K0|S4R3K0_HUMAN	sp|Q96JM3|CHAP1_HUMAN	3942	Q96JM3	CHAP1_HUMAN	Chromosome alignment-maintaining phosphoprotein 1		CHAMP1
20.7534	17.9882	18.5291	16.2418	17.0159	17.5702				glomerular filtration;protein processing	aminopeptidase activity;manganese ion binding;metallopeptidase activity	extracellular exosome;mitochondrion				5	5	5	16.4	16.4	16.4	57.033	0	32.828	95459000	8	1.08603	1	2.14759	2.31004	sp|Q9NQH7|XPP3_HUMAN	sp|Q9NQH7|XPP3_HUMAN	4656	Q9NQH7	XPP3_HUMAN	Probable Xaa-Pro aminopeptidase 3	-Pro aminopeptidase 3	XPNPEP3
19.0787	18.2544	18.7099	16.3152	14.5548	18.7354				endonucleolytic cleavage in 5'-ETS of tricistronic rRNA transcript (SSU-rRNA, 5.8S rRNA, LSU-rRNA);endonucleolytic cleavage in ITS1 to separate SSU-rRNA from 5.8S rRNA and LSU-rRNA from tricistronic rRNA transcript (SSU-rRNA, 5.8S rRNA, LSU-rRNA);endonucleolytic cleavage of tricistronic rRNA transcript (SSU-rRNA, 5.8S rRNA, LSU-rRNA);rRNA processing	endoribonuclease activity	nucleolus;nucleoplasm	Ribosome biogenesis in eukaryotes			5	5	5	16.6	16.6	16.6	40.842	0	13.344	149140000	27	0.80327	1	2.14589	1.73748	sp|Q9Y2P8|RCL1_HUMAN;tr|Q5VZU3|Q5VZU3_HUMAN;tr|Q5VZU2|Q5VZU2_HUMAN;tr|Q5VYW8|Q5VYW8_HUMAN	sp|Q9Y2P8|RCL1_HUMAN	5231	Q9Y2P8	RCL1_HUMAN	RNA 3'-terminal phosphate cyclase-like protein		RCL1
16.1038	15.9296	15.4397	13.0548	13.2968	14.7233				angiogenesis	ATPase activity;metal ion binding;ubiquitin-protein transferase activity	cytosol;nucleolus				17	17	17	4.2	4.2	4.2	591.4	0	36.197	130050000	22	1.72915	1	2.13275	3.82754	tr|A0A0A0MTR7|A0A0A0MTR7_HUMAN;sp|Q63HN8|RN213_HUMAN;tr|A0A0A0MTC1|A0A0A0MTC1_HUMAN	tr|A0A0A0MTR7|A0A0A0MTR7_HUMAN;sp|Q63HN8|RN213_HUMAN;tr|A0A0A0MTC1|A0A0A0MTC1_HUMAN	2919	A0A0A0MTR7	A0A0A0MTR7_HUMAN			RNF213
21.0356	20.3317	20.9655	19.2652	18.827	17.9451				cell cycle;nucleobase-containing compound metabolic process;positive regulation of Notch signaling pathway;pyrimidine nucleoside metabolic process;pyrimidine nucleotide biosynthetic process	methyl-CpG binding;RNA binding	methylosome;midbody				2	2	2	21.2	21.2	21.2	12.259	0	8.1375	64522000	5	2.02559	1	2.09849	4.68282	sp|P84090|ERH_HUMAN;tr|G3V279|G3V279_HUMAN	sp|P84090|ERH_HUMAN;tr|G3V279|G3V279_HUMAN	2097	P84090	ERH_HUMAN	Enhancer of rudimentary homolog		ERH
21.0251	20.2179	1	1	18.6448	16.3479						integral component of membrane				3	3	3	21.5	21.5	21.5	11.896	0.0013574	3.1666	53712000	3	0.086208	1	2.0834	0.242999	tr|B1AH87|B1AH87_HUMAN;sp|P30536|TSPOA_HUMAN	tr|B1AH87|B1AH87_HUMAN;sp|P30536|TSPOA_HUMAN	1389	B1AH87	B1AH87_HUMAN			TSPO
19.9136	19.9034	18.683	16.9153	16.9164	18.5113				bone development;chaperone-mediated protein folding;collagen metabolic process;negative regulation of cell proliferation;negative regulation of post-translational protein modification;protein folding;protein hydroxylation;protein stabilization;regulation of protein secretion	iron ion binding;L-ascorbic acid binding;procollagen-proline 3-dioxygenase activity;protein complex binding	endoplasmic reticulum;endoplasmic reticulum lumen;extracellular exosome;macromolecular complex;membrane;proteinaceous extracellular matrix				7	7	7	10.7	10.7	10.7	83.393	0	25.186	145440000	14	1.42428	1	2.05231	3.06035	sp|Q32P28|P3H1_HUMAN;tr|H7C2W6|H7C2W6_HUMAN;tr|E2QRI1|E2QRI1_HUMAN	sp|Q32P28|P3H1_HUMAN	2731	Q32P28	P3H1_HUMAN	Prolyl 3-hydroxylase 1 {ECO:0000312|HGNC:HGNC:19316}		P3H1
20.9649	18.6381	19.5237	20.5329	17.4323	15.0285				transport		endosome;endosome membrane;extracellular exosome;integral component of plasma membrane				3	3	3	6	6	6	75.775	0	16.297	132370000	18	0.518353	1	2.04433	1.18067	sp|Q99805|TM9S2_HUMAN	sp|Q99805|TM9S2_HUMAN	4110	Q99805	TM9S2_HUMAN	Transmembrane 9 superfamily member 2		TM9SF2
25.1622	23.4127	23.0095	22.0897	21.4292	21.9412				macroautophagy;protein import into mitochondrial matrix;protein import into mitochondrial outer membrane;protein targeting to mitochondrion	protein transmembrane transporter activity	integral component of membrane;integral component of mitochondrial outer membrane;membrane;mitochondrial inner membrane;mitochondrial outer membrane;mitochondrial outer membrane translocase complex				6	6	6	66.2	66.2	66.2	15.521	0	158.69	579480000	44	1.38015	1	2.04145	2.95715	sp|Q9NS69|TOM22_HUMAN	sp|Q9NS69|TOM22_HUMAN	4708	Q9NS69	TOM22_HUMAN	Mitochondrial import receptor subunit TOM22 homolog	Tom22	TOMM22
21.2209	19.0193	1	18.0131	16.1266	1				mRNA splicing, via spliceosome;positive regulation of transcription, DNA-templated;transcription, DNA-templated	DNA binding;DNA binding transcription factor activity;metal ion binding;RNA binding	catalytic step 2 spliceosome;nuclear matrix;nuclear speck;nucleoplasm;precatalytic spliceosome;U12-type spliceosomal complex;U2 snRNP	Spliceosome			6	6	6	55.5	55.5	55.5	12.405	0	13.986	72883000	10	0.0862177	1	2.03348	0.243024	sp|Q7RTV0|PHF5A_HUMAN	sp|Q7RTV0|PHF5A_HUMAN	3140	Q7RTV0	PHF5A_HUMAN	PHD finger-like domain-containing protein 5A	HD finger-like domain protein 5A	PHF5A
21.8201	17.7839	20.1684	18.35	17.2162	18.1591				cellular response to leukemia inhibitory factor;glucosamine metabolic process;liver development;N-acetylglucosamine metabolic process;UDP-N-acetylglucosamine biosynthetic process	glucosamine 6-phosphate N-acetyltransferase activity;identical protein binding;monosaccharide binding	cytosol;endoplasmic reticulum-Golgi intermediate compartment;endosome membrane;Golgi membrane;late endosome	Amino sugar and nucleotide sugar metabolism;Metabolic pathways			6	6	6	56.5	56.5	56.5	20.749	0	17.48	90725000	10	0.757918	1	2.01574	1.6484	sp|Q96EK6|GNA1_HUMAN;tr|G3V4W4|G3V4W4_HUMAN;tr|G3V5E4|G3V5E4_HUMAN	sp|Q96EK6|GNA1_HUMAN;tr|G3V4W4|G3V4W4_HUMAN;tr|G3V5E4|G3V5E4_HUMAN	3854	Q96EK6	GNA1_HUMAN	Glucosamine 6-phosphate N-acetyltransferase		GNPNAT1
23.3203	1	17.9842	1	17.235	18.1844					hydrolase activity					2	2	2	14	14	14	25.029	0.0048381	2.5023	202220000	1	0.0791454	1	1.96169	0.224456	tr|F5GXT0|F5GXT0_HUMAN;tr|F8W7U8|F8W7U8_HUMAN;sp|P49959|MRE11_HUMAN;tr|F5H742|F5H742_HUMAN;tr|F5H256|F5H256_HUMAN	tr|F5GXT0|F5GXT0_HUMAN;tr|F8W7U8|F8W7U8_HUMAN;sp|P49959|MRE11_HUMAN;tr|F5H742|F5H742_HUMAN;tr|F5H256|F5H256_HUMAN	1697	F5GXT0	F5GXT0_HUMAN			MRE11
18.7449	18.7225	17.9044	14.1713	18.0813	17.2475				cellular response to estradiol stimulus;RNA secondary structure unwinding	ATP binding;ATP-dependent RNA helicase activity;RNA binding	chromosome;cytoplasm;membrane;nucleolus				17	17	17	34.9	34.9	34.9	75.406	0	93.908	1041300000	98	0.734909	1	1.95728	1.60337	sp|Q9NVP1|DDX18_HUMAN;tr|H7C452|H7C452_HUMAN	sp|Q9NVP1|DDX18_HUMAN	4769	Q9NVP1	DDX18_HUMAN	ATP-dependent RNA helicase DDX18		DDX18
25.0574	22.6622	22.7512	21.2528	22.2362	21.1338				spliceosomal snRNP assembly		spliceosomal complex				3	3	3	31.2	31.2	31.2	7.1013	0	10.334	395040000	23	1.06744	1	1.94932	2.27118	tr|Q49AN9|Q49AN9_HUMAN;tr|F5H013|F5H013_HUMAN;sp|P62308|RUXG_HUMAN;sp|A8MWD9|RUXGL_HUMAN;tr|C9JVQ0|C9JVQ0_HUMAN	tr|Q49AN9|Q49AN9_HUMAN;tr|F5H013|F5H013_HUMAN;sp|P62308|RUXG_HUMAN;sp|A8MWD9|RUXGL_HUMAN	192	Q49AN9	Q49AN9_HUMAN
19.3094	17.1137	18.6041	17.5789	15.2347	16.4395				activation of innate immune response;apoptotic process;cellular response to exogenous dsRNA;cellular response to interferon-beta;cellular response to organic cyclic compound;defense response to virus;innate immune response;interferon-beta production;neutrophil degranulation;positive regulation of defense response to virus by host;positive regulation of protein binding;positive regulation of prote…	cyclic-di-GMP binding;cyclic-GMP-AMP binding;identical protein binding;protein homodimerization activity;protein kinase binding;transcription factor binding;ubiquitin protein ligase binding	cytoplasmic vesicle membrane;cytosol;endoplasmic reticulum membrane;Golgi apparatus;integral component of membrane;mitochondrial outer membrane;nucleoplasm;perinuclear region of cytoplasm;peroxisome;plasma membrane;secretory granule membrane	Cytosolic DNA-sensing pathway;Herpes simplex virus 1 infection;Human cytomegalovirus infection;Human immunodeficiency virus 1 infection;NOD-like receptor signaling pathway;RIG-I-like receptor signaling pathway			3	3	3	12.4	12.4	12.4	42.192	0	8.5495	31430000	2	0.962479	1	1.92471	2.05537	sp|Q86WV6|STING_HUMAN;tr|J3QTB1|J3QTB1_HUMAN	sp|Q86WV6|STING_HUMAN	3247	Q86WV6	STING_HUMAN	Stimulator of interferon genes protein {ECO:0000303|PubMed:18724357}	STING {ECO:0000303|PubMed:18724357, ECO:0000303|PubMed:26669264}	TMEM173
21.232	17.2627	19.9009	19.9465	13.1423	19.5437					RNA binding	cytosol;nucleoplasm				9	6	2	35.3	26.8	8.8	42.835	0	19.067	145600000	18	0.315115	1	1.92105	0.770393	tr|F8W8I6|F8W8I6_HUMAN;sp|P31483|TIA1_HUMAN;tr|E5RGV5|E5RGV5_HUMAN;tr|E5RG67|E5RG67_HUMAN;tr|F8WE16|F8WE16_HUMAN	tr|F8W8I6|F8W8I6_HUMAN;sp|P31483|TIA1_HUMAN;tr|E5RGV5|E5RGV5_HUMAN	1406	F8W8I6	F8W8I6_HUMAN			TIA1
20.9306	20.2008	21.9885	15.4021	20.1935	21.8108				fatty-acyl-CoA biosynthetic process;monounsaturated fatty acid biosynthetic process;unsaturated fatty acid biosynthetic process	metal ion binding;oxidoreductase activity;stearoyl-CoA 9-desaturase activity	endoplasmic reticulum membrane;integral component of membrane	AMPK signaling pathway;Biosynthesis of unsaturated fatty acids;Fatty acid metabolism;Metabolic pathways;PPAR signaling pathway			5	5	5	13.6	13.6	13.6	37.61	0	89.848	604290000	24	0.405192	1	1.90452	0.955628	sp|Q86SK9|SCD5_HUMAN	sp|Q86SK9|SCD5_HUMAN	3203	Q86SK9	SCD5_HUMAN	Stearoyl-CoA desaturase 5 {ECO:0000305}		SCD5
28.7408	28.5397	28.3186	26.8564	26.3343	26.7021				beta-catenin-TCF complex assembly;cellular protein metabolic process;CENP-A containing nucleosome assembly;chromatin silencing at rDNA;DNA replication-dependent nucleosome assembly;DNA replication-independent nucleosome assembly;DNA-templated transcription, initiation;double-strand break repair via nonhomologous end joining;negative regulation of gene expression, epigenetic;negative regulation of…	DNA binding;histone binding;protein domain specific binding;protein heterodimerization activity;RNA binding	extracellular exosome;extracellular matrix;extracellular region;membrane;nuclear chromosome;nuclear chromosome, telomeric region;nuclear nucleosome;nucleoplasm;nucleosome;nucleus;protein complex	Alcoholism;Systemic lupus erythematosus;Viral carcinogenesis			12	12	12	66	66	66	11.367	0	98.526	34093000000	508	3.19041	1	1.90208	9.64988	sp|P62805|H4_HUMAN	sp|P62805|H4_HUMAN	1991	P62805	H4_HUMAN	Histone H4		HIST1H4A;HIST1H4B;HIST1H4C;HIST1H4D;HIST1H4E;HIST1H4F;HIST1H4H;HIST1H4I;HIST1H4J;HIST1H4K;HIST1H4L;HIST2H4A;HIST2H4B;HIST4H4
22.0739	20.858	19.3022	19.8568	18.1905	18.5568				mitochondrial electron transport, NADH to ubiquinone;mitochondrial respiratory chain complex I assembly	NADH dehydrogenase (ubiquinone) activity	mitochondrial inner membrane;mitochondrial intermembrane space;mitochondrial respiratory chain complex I;mitochondrion	Alzheimer disease;Huntington disease;Metabolic pathways;Non-alcoholic fatty liver disease (NAFLD);Oxidative phosphorylation;Parkinson disease;Retrograde endocannabinoid signaling;Thermogenesis			3	3	3	24.8	24.8	24.8	16.402	0	11.31	72401000	8	0.924805	1	1.87667	1.97925	sp|P17568|NDUB7_HUMAN	sp|P17568|NDUB7_HUMAN	1158	P17568	NDUB7_HUMAN	NADH dehydrogenase [ubiquinone] 1 beta subcomplex subunit 7		NDUFB7
20.0886	18.6792	20.1017	15.0452	18.1981	20.0596				mitochondrial respiratory chain complex I assembly	oxidoreductase activity	integral component of membrane;mitochondrial inner membrane;mitochondrial respiratory chain complex I;mitochondrion				6	6	6	16.9	16.9	16.9	53.811	0	20.939	165890000	8	0.53162	1	1.85554	1.20672	sp|Q96CU9|FXRD1_HUMAN;tr|E9PP78|E9PP78_HUMAN	sp|Q96CU9|FXRD1_HUMAN	3830	Q96CU9	FXRD1_HUMAN	FAD-dependent oxidoreductase domain-containing protein 1 {ECO:0000312|HGNC:HGNC:26927}		FOXRED1
21.6267	18.7204	19.6158	17.7975	17.351	19.2612				cristae formation		extracellular exosome;mitochondrial inner membrane;mitochondrial outer membrane;mitochondrion				12	12	12	30.1	30.1	30.1	63.277	0	224.14	584310000	61	0.829092	1	1.85105	1.78844	sp|Q9NVH1|DJC11_HUMAN;tr|B1AK20|B1AK20_HUMAN;tr|Q5TH61|Q5TH61_HUMAN	sp|Q9NVH1|DJC11_HUMAN;tr|B1AK20|B1AK20_HUMAN	4761	Q9NVH1	DJC11_HUMAN	DnaJ homolog subfamily C member 11		DNAJC11
22.736	18.9735	20.2745	20.4182	16.8623	19.1744				protein methylation	methyltransferase activity					11	2	2	49.1	10.9	10.9	32.693	0	52.773	250130000	22	0.535628	1	1.84302	1.21458	tr|A0A087X1W2|A0A087X1W2_HUMAN	tr|A0A087X1W2|A0A087X1W2_HUMAN	5440	A0A087X1W2	A0A087X1W2_HUMAN			PRMT1
18.9989	17.2928	18.6946	17.3202	16.08	16.1217				anatomical structure morphogenesis;angiogenesis;cell adhesion;glomerular filtration;positive regulation of cell migration;vascular wound healing		external side of plasma membrane;extracellular region;extracellular space;focal adhesion;integral component of membrane;nucleus;plasma membrane				10	10	10	17.8	17.8	17.8	71.607	0	55.404	145710000	20	1.28559	1	1.8215	2.74181	sp|P43121|MUC18_HUMAN	sp|P43121|MUC18_HUMAN	1566	P43121	MUC18_HUMAN	Cell surface glycoprotein MUC18		MCAM
23.0029	20.5625	21.7881	19.054	20.0684	20.8592				mitochondrial translational elongation;mitochondrial translational termination;translation	structural constituent of ribosome	mitochondrial inner membrane;mitochondrial small ribosomal subunit;mitochondrion				3	3	3	28.3	28.3	28.3	12.629	0	10.139	154090000	21	0.955693	1	1.79062	2.04161	sp|Q9Y291|RT33_HUMAN;tr|C9JBY7|C9JBY7_HUMAN	sp|Q9Y291|RT33_HUMAN;tr|C9JBY7|C9JBY7_HUMAN	5213	Q9Y291	RT33_HUMAN	28S ribosomal protein S33, mitochondrial	33mt;RP-S33	MRPS33
23.0642	21.2393	21.186	20.7484	18.8027	20.6077				glutathione derivative biosynthetic process;leukotriene biosynthetic process;lipid metabolic process;response to organonitrogen compound;xenobiotic metabolic process	glutathione peroxidase activity;glutathione transferase activity;leukotriene-C4 synthase activity	endoplasmic reticulum;endoplasmic reticulum membrane;extracellular exosome;integral component of membrane;intracellular membrane-bounded organelle;membrane;nuclear envelope;organelle membrane	Chemical carcinogenesis;Drug metabolism - cytochrome P450;Drug metabolism - other enzymes;Fluid shear stress and atherosclerosis;Glutathione metabolism;Hepatocellular carcinoma;Metabolic pathways;Metabolism of xenobiotics by cytochrome P450;Pathways in cancer;Platinum drug resistance			4	4	4	32.9	32.9	32.9	16.516	0	23.161	330780000	27	0.945181	1	1.77695	2.02034	sp|O14880|MGST3_HUMAN;tr|Q5VV89|Q5VV89_HUMAN;tr|Q5VV87|Q5VV87_HUMAN	sp|O14880|MGST3_HUMAN;tr|Q5VV89|Q5VV89_HUMAN;tr|Q5VV87|Q5VV87_HUMAN	303	O14880	MGST3_HUMAN	Microsomal glutathione S-transferase 3	icrosomal GST-3	MGST3
21.2066	19.651	19.5087	17.7163	19.1676	18.1653				activation of cysteine-type endopeptidase activity involved in apoptotic process;apoptotic process		mitochondrion				2	2	2	18.1	18.1	18.1	18.919	0	8.0735	48633000	3	1.20263	1	1.77234	2.55885	tr|A0A024RBT2|A0A024RBT2_HUMAN;sp|Q9NR28|DBLOH_HUMAN;tr|F5GXT8|F5GXT8_HUMAN;tr|F5H796|F5H796_HUMAN	tr|A0A024RBT2|A0A024RBT2_HUMAN;sp|Q9NR28|DBLOH_HUMAN;tr|F5GXT8|F5GXT8_HUMAN;tr|F5H796|F5H796_HUMAN	4675	A0A024RBT2	A0A024RBT2_HUMAN			DIABLO
28.7819	27.4114	26.6147	27.0433	25.2889	25.1816				antibacterial humoral response;antimicrobial humoral immune response mediated by antimicrobial peptide;defense response to Gram-positive bacterium;innate immune response in mucosa	DNA binding;protein heterodimerization activity	cytosol;extracellular space;nucleoplasm;nucleosome				8	8	2	53.2	53.2	7.9	13.906	0	155.36	31360000000	370	0.944025	1	1.76473	2.018	tr|B2R4S9|B2R4S9_HUMAN;sp|Q99880|H2B1L_HUMAN;sp|Q99879|H2B1M_HUMAN;sp|Q99877|H2B1N_HUMAN;sp|Q93079|H2B1H_HUMAN;sp|Q5QNW6|H2B2F_HUMAN;sp|P62807|H2B1C_HUMAN;sp|P58876|H2B1D_HUMAN;sp|P57053|H2BFS_HUMAN;sp|O60814|H2B1K_HUMAN;tr|U3KQK0|U3KQK0_HUMAN	tr|B2R4S9|B2R4S9_HUMAN;sp|Q99880|H2B1L_HUMAN;sp|Q99879|H2B1M_HUMAN;sp|Q99877|H2B1N_HUMAN;sp|Q93079|H2B1H_HUMAN;sp|Q5QNW6|H2B2F_HUMAN;sp|P62807|H2B1C_HUMAN;sp|P58876|H2B1D_HUMAN;sp|P57053|H2BFS_HUMAN;sp|O60814|H2B1K_HUMAN;tr|U3KQK0|U3KQK0_HUMAN	524	B2R4S9	B2R4S9_HUMAN	Histone H2B {ECO:0000256|RuleBase:RU000451}		HIST1H2BC
23.4086	1	23.7399	18.1885	1	23.6695				negative regulation of RNA polymerase II regulatory region sequence-specific DNA binding;positive regulation of transcription from RNA polymerase II promoter;ribosomal large subunit export from nucleus;transcription, DNA-templated	DNA binding;ribosomal large subunit binding;zinc ion binding	nucleolus;nucleus;preribosome, large subunit precursor				5	5	5	53	53	53	15.199	0	11.279	420740000	18	0.0601534	1	1.76348	0.173539	sp|O00488|ZN593_HUMAN;tr|A9J4F5|A9J4F5_HUMAN	sp|O00488|ZN593_HUMAN;tr|A9J4F5|A9J4F5_HUMAN	247	O00488	ZN593_HUMAN	Zinc finger protein 593		ZNF593
19.6406	14.5804	18.6218	16.7713	14.4551	16.3736				cell proliferation;endocytosis;lipid tube assembly;membrane organization;muscle cell differentiation;nucleus localization;nucleus organization;positive regulation of apoptotic process;positive regulation of astrocyte differentiation;regulation of cell cycle arrest;regulation of endocytosis;regulation of neuron differentiation;viral process	actin filament binding;identical protein binding;RNA polymerase binding;tau protein binding	actin cytoskeleton;axon;axon initial segment;cytoplasm;cytosol;I band;lipid tube;membrane;node of Ranvier;nuclear envelope;T-tubule;Z disc	Endocytosis;Fc gamma R-mediated phagocytosis			3	3	3	9.6	9.6	9.6	64.699	0	17.04	88470000	6	0.440432	1	1.74757	1.0264	sp|O00499|BIN1_HUMAN	sp|O00499|BIN1_HUMAN	248	O00499	BIN1_HUMAN	Myc box-dependent-interacting protein 1		BIN1
18.302	1	18.0487	17.6209	1	13.5234					NADPH-adrenodoxin reductase activity	mitochondrial matrix;mitochondrion				29	1	0	67.2	4.9	0	53.808	0	6.8159	24330000	2	0.0806092	1	1.73543	0.228315	tr|A0A0C4DFN8|A0A0C4DFN8_HUMAN;tr|A0A0A0MSZ4|A0A0A0MSZ4_HUMAN;tr|A0A0A0MTR6|A0A0A0MTR6_HUMAN;tr|A0A0C4DGN7|A0A0C4DGN7_HUMAN;tr|A0A0A0MT64|A0A0A0MT64_HUMAN;tr|A0A0A0MTN9|A0A0A0MTN9_HUMAN;tr|J3QKZ8|J3QKZ8_HUMAN;tr|J3QQW7|J3QQW7_HUMAN	tr|A0A0C4DFN8|A0A0C4DFN8_HUMAN;tr|A0A0A0MSZ4|A0A0A0MSZ4_HUMAN;tr|A0A0A0MTR6|A0A0A0MTR6_HUMAN;tr|A0A0C4DGN7|A0A0C4DGN7_HUMAN;tr|A0A0A0MT64|A0A0A0MT64_HUMAN;tr|A0A0A0MTN9|A0A0A0MTN9_HUMAN	5450	A0A0C4DFN8	A0A0C4DFN8_HUMAN	NADPH:adrenodoxin oxidoreductase, mitochondrial {ECO:0000256|PIRNR:PIRNR000362}		FDXR
19.1812	18.1175	16.7333	15.9328	16.6913	16.2132				cellular response to DNA damage stimulus;negative regulation of cell growth;positive regulation of cell growth;positive regulation of signal transduction;regulation of protein stability	p53 binding;RNA binding	granular component;nucleolus;nucleoplasm				9	9	9	24.8	24.8	24.8	61.124	0	36.145	101670000	21	1.09664	1	1.73159	2.33231	sp|Q9NXV6|CARF_HUMAN;tr|J3KNE1|J3KNE1_HUMAN;tr|D6RGD2|D6RGD2_HUMAN	sp|Q9NXV6|CARF_HUMAN	4837	Q9NXV6	CARF_HUMAN	CDKN2A-interacting protein		CDKN2AIP
18.173	16.1222	16.5827	17.0382	14.4969	14.1618				artery development;neural fold bending;ventricular septum development		extracellular exosome;membrane;nucleus				17	17	17	21.2	21.2	21.2	120.27	0	40.31	130550000	26	0.717616	1	1.72699	1.56959	sp|Q86V48|LUZP1_HUMAN;tr|E5RFK8|E5RFK8_HUMAN;tr|E5RHU7|E5RHU7_HUMAN	sp|Q86V48|LUZP1_HUMAN	3227	Q86V48	LUZP1_HUMAN	Leucine zipper protein 1		LUZP1
24.6607	22.3569	22.8349	22.4576	20.5496	21.6917				regulation of transcription, DNA-templated;response to hypoxia;response to oxidative stress	cadherin binding involved in cell-cell adhesion;metal ion binding;transcription coactivator activity	cell-cell adherens junction;cytoskeleton;focal adhesion;transcription factor complex;Z disc				13	13	13	61.1	61.1	61.1	36.071	0	323.31	1596500000	60	0.89552	1	1.71785	1.9205	sp|O00151|PDLI1_HUMAN	sp|O00151|PDLI1_HUMAN	203	O00151	PDLI1_HUMAN	PDZ and LIM domain protein 1		PDLIM1
23.9932	22.1897	22.8025	21.4471	20.3875	22.0144						nucleus				6	5	5	49.1	39.9	39.9	20.03	0	113.44	480630000	35	1.13017	1	1.71214	2.40315	tr|J3KS05|J3KS05_HUMAN;sp|P83916|CBX1_HUMAN;tr|B5MD17|B5MD17_HUMAN;tr|K7ELA4|K7ELA4_HUMAN;tr|C9JWS9|C9JWS9_HUMAN	tr|J3KS05|J3KS05_HUMAN;sp|P83916|CBX1_HUMAN;tr|B5MD17|B5MD17_HUMAN;tr|K7ELA4|K7ELA4_HUMAN;tr|C9JWS9|C9JWS9_HUMAN	2093	J3KS05	J3KS05_HUMAN			CBX1
21.2146	16.1937	1	1	15.79	16.4968				angiogenesis;negative regulation of transcription, DNA-templated;regulation of transcription from RNA polymerase II promoter;transcription, DNA-templated;viral genome replication	DNA binding;DNA binding transcription factor activity;sequence-specific DNA binding;transcription corepressor activity	cytosol;nucleoplasm;nucleus				6	5	5	13.7	10.4	10.4	60.49	0	9.6147	3477000000	8	0.0759627	1	1.70719	0.216032	sp|Q9NZI7|UBIP1_HUMAN;tr|C9JWL3|C9JWL3_HUMAN;tr|F8WEP8|F8WEP8_HUMAN	sp|Q9NZI7|UBIP1_HUMAN;tr|C9JWL3|C9JWL3_HUMAN	4874	Q9NZI7	UBIP1_HUMAN	Upstream-binding protein 1		UBP1
24.5179	22.9414	23.5331	22.8825	21.3919	21.6416					RNA binding	intracellular ribonucleoprotein complex;viral nucleocapsid				11	11	1	45.2	45.2	6.2	31.948	0	126.42	1773500000	101	1.22114	1	1.69214	2.59921	tr|B2R5W2|B2R5W2_HUMAN;tr|G3V4C1|G3V4C1_HUMAN;tr|G3V4W0|G3V4W0_HUMAN;tr|B4DY08|B4DY08_HUMAN;tr|G3V5X6|G3V5X6_HUMAN;tr|G3V3K6|G3V3K6_HUMAN;tr|G3V251|G3V251_HUMAN;tr|G3V2D6|G3V2D6_HUMAN;tr|B4DSU6|B4DSU6_HUMAN;tr|G3V5V7|G3V5V7_HUMAN;tr|A0A0G2JPF8|A0A0G2JPF8_HUMAN;tr|A0A0G2JNQ3|A0A0G2JNQ3_HUMAN;sp|P0DMR1|HNRC4_HUMAN;sp|O60812|HNRC1_HUMAN;sp|B7ZW38|HNRC3_HUMAN;sp|B2RXH8|HNRC2_HUMAN;tr|G3V4M8|G3V4M8_HU…	tr|B2R5W2|B2R5W2_HUMAN;tr|G3V4C1|G3V4C1_HUMAN;tr|G3V4W0|G3V4W0_HUMAN;tr|B4DY08|B4DY08_HUMAN;tr|G3V5X6|G3V5X6_HUMAN;tr|G3V3K6|G3V3K6_HUMAN;tr|G3V251|G3V251_HUMAN;tr|G3V2D6|G3V2D6_HUMAN	5476	B2R5W2	B2R5W2_HUMAN			HNRNPC
19.2088	17.9047	18.0241	19.124	13.386	17.599				cellular response to oxidative stress;peptidyl-serine phosphorylation;protein autophosphorylation;protein phosphorylation;regulation of cell shape;regulation of interleukin-1-mediated signaling pathway;regulation of MAPK cascade;viral process	ATP binding;protein domain specific binding;protein kinase binding;protein serine/threonine kinase activity	cytoplasm;endoplasmic reticulum;endoplasmic reticulum membrane;integral component of membrane;mitochondrial membrane;nucleus;protein complex				14	14	14	38.6	38.6	38.6	58.14	0	56.305	348710000	52	0.402055	1	1.67616	0.94929	sp|Q86Y07|VRK2_HUMAN;tr|E7ERS5|E7ERS5_HUMAN;tr|E9PBU1|E9PBU1_HUMAN	sp|Q86Y07|VRK2_HUMAN	3261	Q86Y07	VRK2_HUMAN	Serine/threonine-protein kinase VRK2		VRK2
23.8505	20.8398	21.6104	20.53	19.8515	20.9079				oocyte maturation;spindle assembly involved in female meiosis	GTP binding;GTPase activity;structural constituent of cytoskeleton	cytoplasm;extracellular exosome;meiotic spindle;microtubule;microtubule cytoskeleton	Gap junction;Pathogenic Escherichia coli infection;Phagosome			9	1	1	24.3	7.2	7.2	49.775	0	171.77	633070000	23	0.809765	1	1.67043	1.75028	sp|Q3ZCM7|TBB8_HUMAN;tr|A0A075B736|A0A075B736_HUMAN;tr|Q5SQY0|Q5SQY0_HUMAN	sp|Q3ZCM7|TBB8_HUMAN;tr|A0A075B736|A0A075B736_HUMAN;tr|Q5SQY0|Q5SQY0_HUMAN	2745	Q3ZCM7	TBB8_HUMAN	Tubulin beta-8 chain {ECO:0000305}		TUBB8
21.2258	19.0501	19.4423	18.9896	18.2406	17.4852				mRNA 3'-end processing;mRNA export from nucleus;mRNA splicing, via spliceosome;RNA export from nucleus;RNA splicing;RNA splicing, via transesterification reactions;termination of RNA polymerase II transcription	DNA binding;RNA binding	catalytic step 2 spliceosome;cytosol;nuclear matrix;nuclear speck;nucleoplasm;nucleus	mRNA surveillance pathway;RNA transport			18	18	18	23	23	23	102.33	0	209.31	2014700000	124	0.979392	1	1.66764	2.08976	sp|Q8IYB3|SRRM1_HUMAN;tr|A9Z1X7|A9Z1X7_HUMAN;tr|E9PCT1|E9PCT1_HUMAN;tr|M0R088|M0R088_HUMAN;tr|M0R1E7|M0R1E7_HUMAN;tr|M0QXG5|M0QXG5_HUMAN	sp|Q8IYB3|SRRM1_HUMAN;tr|A9Z1X7|A9Z1X7_HUMAN;tr|E9PCT1|E9PCT1_HUMAN;tr|M0R088|M0R088_HUMAN	3336	Q8IYB3	SRRM1_HUMAN	Serine/arginine repetitive matrix protein 1		SRRM1
24.0008	23.1619	20.5835	20.5208	22.0554	20.1749				ATP-dependent chromatin remodeling;cell junction assembly;ephrin receptor signaling pathway;Fc-gamma receptor signaling pathway involved in phagocytosis;membrane organization;movement of cell or subcellular component;negative regulation of protein binding;platelet aggregation;positive regulation of gene expression, epigenetic;postsynaptic actin cytoskeleton organization;protein deubiquitination;r…	ATP binding;identical protein binding;kinesin binding;nitric-oxide synthase binding;structural constituent of cytoskeleton;structural constituent of postsynaptic actin cytoskeleton;Tat protein binding	actin cytoskeleton;blood microparticle;cortical cytoskeleton;cytoplasm;cytoplasmic ribonucleoprotein granule;cytoskeleton;cytosol;dense body;extracellular exosome;extracellular space;focal adhesion;intracellular ribonucleoprotein complex;membrane;myelin sheath;NuA4 histone acetyltransferase complex;nuclear chromatin;nucleoplasm;nucleus;plasma membrane;protein complex;vesicle	Adherens junction;Apoptosis;Arrhythmogenic right ventricular cardiomyopathy (ARVC);Bacterial invasion of epithelial cells;Dilated cardiomyopathy (DCM);Fluid shear stress and atherosclerosis;Focal adhesion;Gastric acid secretion;Hepatocellular carcinoma;Hippo signaling pathway;Hypertrophic cardiomyopathy (HCM);Influenza A;Leukocyte transendothelial migration;Oxytocin signaling pathway;Pathogenic E…			29	1	1	81.3	4.5	4.5	41.736	0	86.086	1366500000	32	0.636617	1	1.66507	1.41172	sp|P60709|ACTB_HUMAN;tr|G5E9R0|G5E9R0_HUMAN;tr|E7EVS6|E7EVS6_HUMAN;tr|C9JZR7|C9JZR7_HUMAN;tr|C9JTX5|C9JTX5_HUMAN	sp|P60709|ACTB_HUMAN	1897	P60709	ACTB_HUMAN	Actin, cytoplasmic 1		ACTB
17.6103	19.251	16.2208	14.4605	15.1686	18.5347				angiogenesis involved in wound healing;cell-matrix adhesion;glycosaminoglycan catabolic process;heparan sulfate proteoglycan catabolic process;neutrophil degranulation;positive regulation of blood coagulation;positive regulation of hair follicle development;positive regulation of osteoblast proliferation;positive regulation of protein kinase B signaling;positive regulation of vascular endothelial…	beta-glucuronidase activity;heparanase activity;protein dimerization activity;syndecan binding	extracellular region;intracellular membrane-bounded organelle;lysosomal lumen;lysosomal membrane;lysosome;membrane raft;nucleoplasm;nucleus;proteinaceous extracellular matrix;specific granule lumen	Glycosaminoglycan degradation;Metabolic pathways;Proteoglycans in cancer			10	10	10	25.2	25.2	25.2	61.148	0	25.433	340660000	32	0.462439	1	1.63942	1.07024	sp|Q9Y251|HPSE_HUMAN	sp|Q9Y251|HPSE_HUMAN	5202	Q9Y251	HPSE_HUMAN	Heparanase		HPSE
22.713	21.8285	21.3009	19.1163	20.9308	20.8794										7	7	5	13.1	13.1	9.9	84.109	0	71.76	6334600000	114	1.06232	1	1.63861	2.2605	tr|G3V325|G3V325_HUMAN;sp|O75127|PTCD1_HUMAN;tr|C9JJT5|C9JJT5_HUMAN;tr|C9JGL8|C9JGL8_HUMAN;tr|C9JWL7|C9JWL7_HUMAN;tr|C9JQN9|C9JQN9_HUMAN	tr|G3V325|G3V325_HUMAN;sp|O75127|PTCD1_HUMAN	5548	G3V325	G3V325_HUMAN			ATP5MF-PTCD1
20.3483	19.4532	20.0188	17.8398	17.986	19.1184										4	4	4	16.6	16.6	16.6	34.815	0	6.6373	91629000	7	1.55523	1	1.62537	3.37762	tr|Q9UFM8|Q9UFM8_HUMAN;sp|Q9Y639|NPTN_HUMAN;tr|H3BU51|H3BU51_HUMAN;tr|H3BQ94|H3BQ94_HUMAN	tr|Q9UFM8|Q9UFM8_HUMAN;sp|Q9Y639|NPTN_HUMAN;tr|H3BU51|H3BU51_HUMAN	5387	Q9UFM8	Q9UFM8_HUMAN			DKFZp566H1924
20.6369	19.9012	17.5392	16.6208	19.3227	17.2613				bicarbonate transport;platelet degranulation;positive regulation of protein targeting to mitochondrion;sterol biosynthetic process	cytochrome-b5 reductase activity, acting on NAD(P)H;oxidoreductase activity	endoplasmic reticulum membrane;extracellular exosome;integral component of membrane;membrane;mitochondrion;plasma membrane;platelet alpha granule membrane	Amino sugar and nucleotide sugar metabolism			7	7	7	29.2	29.2	29.2	34.094	0	20.578	94825000	7	0.58432	1	1.62412	1.3098	sp|Q9UHQ9|NB5R1_HUMAN;tr|H7C0R7|H7C0R7_HUMAN	sp|Q9UHQ9|NB5R1_HUMAN;tr|H7C0R7|H7C0R7_HUMAN	5030	Q9UHQ9	NB5R1_HUMAN	NADH-cytochrome b5 reductase 1	5R.1	CYB5R1
20.9725	20.1672	20.3694	19.4266	18.0253	19.1897				hemidesmosome assembly	actin binding;ankyrin binding;cadherin binding;RNA binding;structural constituent of muscle	brush border;costamere;cytosol;extracellular exosome;extracellular matrix;focal adhesion;hemidesmosome;intermediate filament cytoskeleton;plasma membrane;sarcolemma;sarcoplasm				133	133	131	38.5	38.5	37.8	531.78	0	323.31	3428400000	308	1.51201	1	1.62249	3.27101	sp|Q15149|PLEC_HUMAN;tr|E9PMV1|E9PMV1_HUMAN;tr|H0YDN1|H0YDN1_HUMAN;tr|E9PKG0|E9PKG0_HUMAN;tr|E9PQ28|E9PQ28_HUMAN;tr|E9PIA2|E9PIA2_HUMAN	sp|Q15149|PLEC_HUMAN	2565	Q15149	PLEC_HUMAN	Plectin	CN;LTN	PLEC
19.885	17.3511	20.339	16.4809	16.8387	19.4227				cellular response to oxidative stress	glutathione peroxidase activity;peroxidase activity	endoplasmic reticulum lumen;integral component of membrane	Arachidonic acid metabolism;Glutathione metabolism;Metabolic pathways;Thyroid hormone synthesis			5	5	5	30.1	30.1	30.1	23.881	0	14.756	147770000	24	0.542115	1	1.61095	1.2273	sp|Q8TED1|GPX8_HUMAN;tr|E7ETY7|E7ETY7_HUMAN;tr|J3KNB5|J3KNB5_HUMAN	sp|Q8TED1|GPX8_HUMAN;tr|E7ETY7|E7ETY7_HUMAN	3577	Q8TED1	GPX8_HUMAN	Probable glutathione peroxidase 8	Px-8;SHPx-8	GPX8
24.0309	22.4358	22.3278	20.6901	20.8891	22.3835				cellular respiration;mitochondrial electron transport, NADH to ubiquinone;mitochondrial respiratory chain complex I assembly;negative regulation of cell growth;negative regulation of intrinsic apoptotic signaling pathway;reactive oxygen species metabolic process;substantia nigra development	electron transfer activity;NADH dehydrogenase (ubiquinone) activity;NADH dehydrogenase activity	mitochondrial matrix;mitochondrial membrane;mitochondrial respiratory chain complex I;mitochondrion;myelin sheath;nuclear body	Alzheimer disease;Huntington disease;Metabolic pathways;Non-alcoholic fatty liver disease (NAFLD);Oxidative phosphorylation;Parkinson disease;Retrograde endocannabinoid signaling;Thermogenesis			14	14	14	49.2	49.2	49.2	30.241	0	116.87	1119500000	64	0.983978	1	1.61061	2.0991	sp|O75489|NDUS3_HUMAN;tr|E9PS48|E9PS48_HUMAN;tr|G3V194|G3V194_HUMAN;tr|E9PKL8|E9PKL8_HUMAN	sp|O75489|NDUS3_HUMAN	597	O75489	NDUS3_HUMAN	NADH dehydrogenase [ubiquinone] iron-sulfur protein 3, mitochondrial		NDUFS3
25.751	24.1143	24.1574	22.7666	22.6036	23.8435				ATP synthesis coupled electron transport;lactation;mitochondrial electron transport, cytochrome c to oxygen;response to cold	copper ion binding;cytochrome-c oxidase activity	extracellular exosome;integral component of membrane;membrane;mitochondrial inner membrane;mitochondrial respiratory chain complex IV;mitochondrion;respiratory chain complex IV	Alzheimer disease;Cardiac muscle contraction;Huntington disease;Metabolic pathways;Non-alcoholic fatty liver disease (NAFLD);Oxidative phosphorylation;Parkinson disease;Thermogenesis			7	7	7	32.2	32.2	32.2	25.565	0	73.611	1381600000	72	1.13478	1	1.60301	2.41296	sp|P00403|COX2_HUMAN	sp|P00403|COX2_HUMAN	825	P00403	COX2_HUMAN	Cytochrome c oxidase subunit 2		MT-CO2
18.7599	17.9592	1	15.4169	16.5126	1				amino acid transmembrane transport;bone development;sodium ion transport	amino acid transmembrane transporter activity	Golgi apparatus;integral component of membrane				5	5	5	8	8	8	119.76	0	22.295	83521000	11	0.0732071	1	1.59656	0.208705	sp|Q9HBR0|S38AA_HUMAN	sp|Q9HBR0|S38AA_HUMAN	4579	Q9HBR0	S38AA_HUMAN	Putative sodium-coupled neutral amino acid transporter 10		SLC38A10
20.0239	17.8632	18.1033	16.6141	16.9937	17.5946				Golgi organization;Golgi to plasma membrane protein transport;Golgi vesicle budding;positive regulation of protein secretion;retrograde vesicle-mediated transport, Golgi to ER	phosphatidylinositol-4-phosphate binding	cytosol;Golgi cisterna;Golgi cisterna membrane;Golgi membrane;trans-Golgi network;trans-Golgi network membrane				3	3	3	22.1	22.1	22.1	32.767	0	8.3214	48965000	6	1.01086	1	1.59603	2.15412	sp|Q9H4A5|GLP3L_HUMAN;tr|Q5T5I6|Q5T5I6_HUMAN	sp|Q9H4A5|GLP3L_HUMAN;tr|Q5T5I6|Q5T5I6_HUMAN	4462	Q9H4A5	GLP3L_HUMAN	Golgi phosphoprotein 3-like		GOLPH3L
21.0946	20.1333	20.6801	19.5883	17.3845	20.1552				membrane organization;positive regulation of neuron projection development;protein targeting to lysosome;regulation of endosome organization;regulation of glucosylceramidase activity;regulation of lysosome organization	enzyme binding;receptor activity;virus receptor activity	clathrin-coated vesicle membrane;extracellular exosome;focal adhesion;integral component of membrane;late endosome membrane;lysosomal lumen;lysosomal membrane;membrane;plasma membrane	Lysosome			6	6	6	15.7	15.7	15.7	54.29	0	24.347	243690000	21	0.830277	1	1.59336	1.79078	sp|Q14108|SCRB2_HUMAN;tr|D6RDG0|D6RDG0_HUMAN	sp|Q14108|SCRB2_HUMAN	2431	Q14108	SCRB2_HUMAN	Lysosome membrane protein 2		SCARB2
20.4463	18.0077	20.0177	16.4773	16.9356	20.3087				cell adhesion;positive regulation of synapse assembly		cell surface;endoplasmic reticulum;integral component of plasma membrane				4	4	4	13.3	13.3	13.3	46.031	0	6.3203	102340000	4	0.483925	1	1.58333	1.11282	sp|Q13641|TPBG_HUMAN	sp|Q13641|TPBG_HUMAN	2400	Q13641	TPBG_HUMAN	Trophoblast glycoprotein		TPBG
23.0491	22.5588	22.129	19.583	21.3276	22.0841				brain development;cAMP-mediated signaling;cellular respiration;mitochondrial electron transport, NADH to ubiquinone;mitochondrial respiratory chain complex I assembly;positive regulation of fibroblast proliferation;reactive oxygen species metabolic process;regulation of protein phosphorylation;response to cAMP	NADH dehydrogenase (ubiquinone) activity	mitochondrial inner membrane;mitochondrial respiratory chain complex I;mitochondrion	Alzheimer disease;Huntington disease;Metabolic pathways;Non-alcoholic fatty liver disease (NAFLD);Oxidative phosphorylation;Parkinson disease;Retrograde endocannabinoid signaling;Thermogenesis			5	5	5	39.4	39.4	39.4	20.108	0	26.241	431620000	27	0.939565	1	1.58071	2.009	sp|O43181|NDUS4_HUMAN;tr|H0Y9M8|H0Y9M8_HUMAN	sp|O43181|NDUS4_HUMAN	393	O43181	NDUS4_HUMAN	NADH dehydrogenase [ubiquinone] iron-sulfur protein 4, mitochondrial		NDUFS4
19.5926	18.1793	18.74	19.2117	17.5985	14.9651				cellular response to DNA damage stimulus;defense response to virus;double-strand break repair;endosome to lysosome transport;histone H2A ubiquitination;histone H2B ubiquitination;histone monoubiquitination;innate immune response;negative regulation of ubiquitin-protein transferase activity;positive regulation of chromatin binding;positive regulation of defense response to virus by host;positive r…	enzyme activator activity;enzyme binding;enzyme inhibitor activity;histone binding;metal ion binding;RNA binding;STAT family protein binding;ubiquitin-like protein ligase binding;ubiquitin-protein transferase activity	cytoplasm;cytosol;early endosome membrane;lysosomal membrane;lysosome;nucleoplasm;nucleus;protein complex	Notch signaling pathway			16	16	16	27.7	27.7	27.7	83.553	0	147.98	497500000	46	0.533672	1	1.57888	1.21075	sp|Q8TDB6|DTX3L_HUMAN	sp|Q8TDB6|DTX3L_HUMAN	3562	Q8TDB6	DTX3L_HUMAN	E3 ubiquitin-protein ligase DTX3L		DTX3L
21.9326	19.8924	20.0089	18.3179	19.4563	19.3265				antigen processing and presentation of exogenous peptide antigen via MHC class II;negative regulation of ERBB signaling pathway;negative regulation of multicellular organism growth;negative regulation of neuron apoptotic process;proteolysis;proteolysis involved in cellular protein catabolic process;receptor catabolic process;renal system process;response to acidic pH;toll-like receptor signaling …	cysteine-type endopeptidase activity;peptidase activity	apical part of cell;endolysosome lumen;extracellular exosome;late endosome;lysosomal lumen;lysosome	Antigen processing and presentation;Lysosome			4	4	4	9.9	9.9	9.9	49.411	0	90.981	323600000	15	0.982048	1	1.57773	2.09517	sp|Q99538|LGMN_HUMAN;tr|G3V2T4|G3V2T4_HUMAN;tr|G3V4E4|G3V4E4_HUMAN;tr|H0YJN9|H0YJN9_HUMAN	sp|Q99538|LGMN_HUMAN;tr|G3V2T4|G3V2T4_HUMAN;tr|G3V4E4|G3V4E4_HUMAN	4073	Q99538	LGMN_HUMAN	Legumain		LGMN
20.9074	20.3892	19.9884	19.699	18.2953	18.5612				cell differentiation;multicellular organism development;negative regulation of transcription, DNA-templated	transcription corepressor activity	cytosol;microtubule;nucleus				14	14	14	23.8	23.8	23.8	80.642	0	54.689	445070000	49	1.44755	1	1.57652	3.11549	sp|Q96AQ6|PBIP1_HUMAN;tr|F2Z2Z8|F2Z2Z8_HUMAN;tr|Q5T173|Q5T173_HUMAN	sp|Q96AQ6|PBIP1_HUMAN	3793	Q96AQ6	PBIP1_HUMAN	Pre-B-cell leukemia transcription factor-interacting protein 1		PBXIP1
20.6753	17.5805	16.6814	17.0107	16.4709	16.7431				mitochondrion organization	calcium ion binding;GTP binding;GTPase activity	integral component of mitochondrial outer membrane				5	4	4	9.9	8	8	68.449	0	7.1907	102420000	9	0.573137	1	1.57083	1.28797	tr|H7BXZ6|H7BXZ6_HUMAN;sp|Q8IXI2|MIRO1_HUMAN;tr|K7EIQ7|K7EIQ7_HUMAN	tr|H7BXZ6|H7BXZ6_HUMAN;sp|Q8IXI2|MIRO1_HUMAN	3320	H7BXZ6	H7BXZ6_HUMAN	Mitochondrial Rho GTPase {ECO:0000256|PIRNR:PIRNR037488}
24.9014	24.5203	24.1279	22.763	22.987	23.1018				angiogenesis;angiotensin-activated signaling pathway involved in heart process;apoptotic signaling pathway;beta-catenin destruction complex disassembly;calcium ion homeostasis;calcium ion transport;caveola assembly;caveolin-mediated endocytosis;cellular calcium ion homeostasis;cellular response to exogenous dsRNA;cellular response to hyperoxia;cellular response to peptide hormone stimulus;cellula…	ATPase binding;cholesterol binding;enzyme binding;identical protein binding;inward rectifier potassium channel inhibitor activity;ion channel binding;nitric-oxide synthase binding;patched binding;peptidase activator activity;protein binding, bridging;protein complex scaffold activity;protein heterodimerization activity;protein kinase binding;Rac GTPase binding;receptor binding;structural molecule…	acrosomal membrane;apical plasma membrane;basolateral plasma membrane;caveola;cell cortex;cilium;cytoplasmic vesicle;early endosome membrane;endocytic vesicle membrane;endoplasmic reticulum;endoplasmic reticulum membrane;endosome;focal adhesion;Golgi membrane;integral component of plasma membrane;intracellular;lipid droplet;membrane;membrane raft;perinuclear region of cytoplasm;plasma membrane;pr…	Bacterial invasion of epithelial cells;Endocytosis;Fluid shear stress and atherosclerosis;Focal adhesion;Proteoglycans in cancer;Viral myocarditis			4	4	2	30.3	30.3	12.9	20.471	0	51.606	1415400000	35	2.5155	1	1.56592	6.4054	sp|Q03135|CAV1_HUMAN;tr|E9PCT5|E9PCT5_HUMAN;sp|P56539|CAV3_HUMAN	sp|Q03135|CAV1_HUMAN;tr|E9PCT5|E9PCT5_HUMAN	2172	Q03135	CAV1_HUMAN	Caveolin-1		CAV1
24.1608	21.5708	23.0289	23.0434	17.9436	23.1021				mitochondrial electron transport, NADH to ubiquinone;mitochondrial respiratory chain complex I assembly	NADH dehydrogenase (ubiquinone) activity;protein complex binding	mitochondrial inner membrane;mitochondrial intermembrane space;mitochondrial respiratory chain complex I;mitochondrion	Alzheimer disease;Huntington disease;Metabolic pathways;Non-alcoholic fatty liver disease (NAFLD);Oxidative phosphorylation;Parkinson disease;Retrograde endocannabinoid signaling;Thermogenesis			7	7	7	46.5	46.5	46.5	20.105	0	60.558	604580000	39	0.345673	1	1.55713	0.834067	sp|P51970|NDUA8_HUMAN	sp|P51970|NDUA8_HUMAN	1762	P51970	NDUA8_HUMAN	NADH dehydrogenase [ubiquinone] 1 alpha subcomplex subunit 8		NDUFA8
23.5328	21.5825	20.4255	21.1042	19.68	20.0946				cholesterol biosynthetic process;negative regulation of transcription from RNA polymerase II promoter;positive regulation of cell proliferation;positive regulation of transcription from RNA polymerase II promoter;positive regulation of transcription, DNA-templated;regulation of transcription, DNA-templated;transcription, DNA-templated	DNA binding transcription factor activity;RNA binding;RNA polymerase II regulatory region sequence-specific DNA binding;transcriptional repressor activity, RNA polymerase II transcription regulatory region sequence-specific DNA binding;zinc ion binding	cytosol;endoplasmic reticulum;nucleus				5	5	5	34.5	34.5	34.5	19.463	0	81.407	313930000	20	0.709245	1	1.55399	1.55325	sp|P62633|CNBP_HUMAN;tr|D6RAT4|D6RAT4_HUMAN	sp|P62633|CNBP_HUMAN	1984	P62633	CNBP_HUMAN	Cellular nucleic acid-binding protein	NBP	CNBP
19.9606	18.9266	19.0488	17.5427	17.6277	18.1538				mRNA processing;mRNA splicing, via spliceosome;RNA splicing;RNA splicing, via transesterification reactions;spliceosomal tri-snRNP complex assembly	identical protein binding;RNA binding	Cajal body;cytosol;nuclear speck;nucleoplasm;nucleus;protein complex;spliceosomal complex;U4/U6 x U5 tri-snRNP complex	Spliceosome			15	15	15	32.8	32.8	32.8	77.528	0	45.827	549150000	62	1.81613	1	1.53726	4.06616	sp|O43395|PRPF3_HUMAN	sp|O43395|PRPF3_HUMAN	414	O43395	PRPF3_HUMAN	U4/U6 small nuclear ribonucleoprotein Prp3		PRPF3
19.8196	20.3689	1	19.8458	15.7449	1				basement membrane organization;cellular response to BMP stimulus;epithelial cell morphogenesis involved in placental branching;establishment or maintenance of cell polarity;movement of cell or subcellular component;negative regulation of cell motility;negative regulation of cell-cell adhesion;negative regulation of neural precursor cell proliferation;neural tube closure	endopeptidase inhibitor activity;serine-type endopeptidase inhibitor activity	cytoplasm;extracellular region;integral component of membrane;plasma membrane				3	3	3	15.1	15.1	15.1	28.228	0	7.7906	143860000	11	0.062175	1	1.5326	0.179035	sp|O43291|SPIT2_HUMAN;tr|K7EM91|K7EM91_HUMAN;tr|K7EKC8|K7EKC8_HUMAN;tr|K7EKQ0|K7EKQ0_HUMAN	sp|O43291|SPIT2_HUMAN;tr|K7EM91|K7EM91_HUMAN	402	O43291	SPIT2_HUMAN	Kunitz-type protease inhibitor 2		SPINT2
21.2716	20.0667	20.5082	19.4322	18.5204	19.3589										17	14	14	31.6	28.5	28.5	69.948	0	43.45	501540000	46	1.52526	1	1.51169	3.30347	tr|J9JID7|J9JID7_HUMAN;sp|Q03252|LMNB2_HUMAN	tr|J9JID7|J9JID7_HUMAN;sp|Q03252|LMNB2_HUMAN	2175	J9JID7
20.1577	19.6639	20.0922	18.6677	18.6575	18.0562				cell-cell signaling;cellular protein metabolic process;constitutive protein ectodomain proteolysis;extracellular matrix disassembly;in utero embryonic development;integrin-mediated signaling pathway;membrane protein ectodomain proteolysis;monocyte activation;negative regulation of cell adhesion;neutrophil degranulation;Notch receptor processing;Notch signaling pathway;PMA-inducible membrane prote…	endopeptidase activity;integrin binding;metal ion binding;metalloendopeptidase activity;metallopeptidase activity;protein homodimerization activity;protein kinase binding;receptor binding;SH3 domain binding	cell surface;cytoplasm;endoplasmic reticulum lumen;extracellular exosome;focal adhesion;Golgi apparatus;Golgi membrane;Golgi-associated vesicle;integral component of membrane;membrane;nucleus;perinuclear endoplasmic reticulum;plasma membrane;postsynaptic density;specific granule membrane;tertiary granule membrane;tetraspanin-enriched microdomain	Alzheimer disease;Epithelial cell signaling in Helicobacter pylori infection			12	12	12	22.9	22.9	22.9	84.141	0	38.81	300270000	30	2.39306	1	1.51082	5.93312	sp|O14672|ADA10_HUMAN;tr|H3BS53|H3BS53_HUMAN;tr|H0YNC5|H0YNC5_HUMAN	sp|O14672|ADA10_HUMAN	284	O14672	ADA10_HUMAN	Disintegrin and metalloproteinase domain-containing protein 10	DAM 10	ADAM10
18.1495	14.0975	11.8563	13.8154	12.6182	13.1445				centrosome localization;cytoskeletal anchoring at nuclear membrane;establishment or maintenance of cell polarity;fibroblast migration;nuclear envelope organization;nuclear migration;nuclear migration along microfilament;nucleokinesis involved in cell motility in cerebral cortex radial glia guided migration;positive regulation of cell migration;protein localization to nucleus;regulation of cilium …	actin binding;actin filament binding	aggresome;cytoplasm;extracellular exosome;filopodium membrane;focal adhesion;integral component of membrane;intermediate filament cytoskeleton;lamellipodium membrane;LINC complex;mitochondrion;nuclear envelope;nuclear lumen;nuclear membrane;nuclear outer membrane;nucleoplasm;nucleus;sarcoplasmic reticulum;sarcoplasmic reticulum membrane;Z disc				22	22	22	4.5	4.5	4.5	796.43	0	33.835	239650000	24	0.331645	1	1.50842	0.804958	sp|Q8WXH0|SYNE2_HUMAN;tr|G3V5X4|G3V5X4_HUMAN;tr|A0A0A0MRE3|A0A0A0MRE3_HUMAN;tr|A0A0C4DGK3|A0A0C4DGK3_HUMAN;tr|A0A0C4DH87|A0A0C4DH87_HUMAN;tr|G3V5D3|G3V5D3_HUMAN;tr|G3V5N1|G3V5N1_HUMAN;tr|G3V3D4|G3V3D4_HUMAN;tr|G3V4T3|G3V4T3_HUMAN	sp|Q8WXH0|SYNE2_HUMAN;tr|G3V5X4|G3V5X4_HUMAN;tr|A0A0A0MRE3|A0A0A0MRE3_HUMAN;tr|A0A0C4DGK3|A0A0C4DGK3_HUMAN	3647	Q8WXH0	SYNE2_HUMAN	Nesprin-2		SYNE2
21.2129	19.6395	20.795	19.5138	18.1365	19.4841				androgen receptor signaling pathway;circadian rhythm;intracellular steroid hormone receptor signaling pathway;mRNA processing;mRNA stabilization;nuclear-transcribed mRNA catabolic process;positive regulation of circadian rhythm;positive regulation of mRNA splicing, via spliceosome;positive regulation of transcription from RNA polymerase II promoter;positive regulation of transcription, DNA-templa…	ATP binding;core promoter sequence-specific DNA binding;ligand-dependent nuclear receptor transcription coactivator activity;phosphoprotein binding;receptor activity;RNA binding;RNA polymerase II transcription cofactor activity;thyroid hormone receptor binding;transcription coactivator activity;transcription cofactor activity;vitamin D receptor binding	extracellular exosome;mediator complex;nuclear speck;nucleoplasm;nucleus				18	18	17	21.8	21.8	21.8	108.66	0	114.59	740640000	70	1.08127	1	1.50434	2.30006	sp|Q9Y2W1|TR150_HUMAN	sp|Q9Y2W1|TR150_HUMAN	5247	Q9Y2W1	TR150_HUMAN	Thyroid hormone receptor-associated protein 3		THRAP3
22.7216	21.7816	22.2094	20.8074	20.0668	21.3504					RNA binding;zinc ion binding					7	7	6	42.3	42.3	42.3	15.763	0	21.202	380610000	25	1.50242	1	1.49602	3.24759	tr|A0A0B4J1Z1|A0A0B4J1Z1_HUMAN;tr|C9JAB2|C9JAB2_HUMAN;sp|Q16629|SRSF7_HUMAN	tr|A0A0B4J1Z1|A0A0B4J1Z1_HUMAN;tr|C9JAB2|C9JAB2_HUMAN;sp|Q16629|SRSF7_HUMAN	2679	A0A0B4J1Z1	A0A0B4J1Z1_HUMAN			SRSF7
19.3568	18.3645	18.7871	17.2962	17.4266	17.2997					oxidoreductase activity					10	10	10	16.2	16.2	16.2	88.569	0	23.238	174430000	14	2.16922	1	1.49532	5.14388	tr|A8MT40|A8MT40_HUMAN;sp|Q8NCN5|PDPR_HUMAN;tr|B7ZAR9|B7ZAR9_HUMAN;tr|H3BQG3|H3BQG3_HUMAN;tr|H3BUH3|H3BUH3_HUMAN	tr|A8MT40|A8MT40_HUMAN;sp|Q8NCN5|PDPR_HUMAN	3474	A8MT40	A8MT40_HUMAN			PDPR
20.0331	18.1536	17.8238	17.3132	16.2765	17.9489				cell differentiation;DNA dealkylation involved in DNA repair;mRNA export from nucleus;mRNA processing;oxidative single-stranded RNA demethylation;response to hypoxia;spermatogenesis	metal ion binding;oxidative RNA demethylase activity;oxidoreductase activity, acting on paired donors, with incorporation or reduction of molecular oxygen, 2-oxoglutarate as one donor, and incorporation of one atom each of oxygen into both donors;RNA binding	cytosol;Golgi apparatus;nuclear speck;nucleoplasm;nucleus				5	5	5	16.5	16.5	16.5	44.255	0	13.395	65876000	4	0.818641	1	1.49061	1.76779	sp|Q6P6C2|ALKB5_HUMAN;tr|K7ER58|K7ER58_HUMAN	sp|Q6P6C2|ALKB5_HUMAN	3020	Q6P6C2	ALKB5_HUMAN	RNA demethylase ALKBH5 {ECO:0000303|PubMed:24616105}		ALKBH5
19.3478	18.3181	19.1802	15.194	17.5772	19.6198				carbohydrate metabolic process;chondroitin sulfate metabolic process;chondroitin sulfate proteoglycan biosynthetic process;dermatan sulfate proteoglycan biosynthetic process;glycosaminoglycan biosynthetic process;glycosaminoglycan metabolic process;heparan sulfate proteoglycan biosynthetic process;positive regulation of catalytic activity;positive regulation of intracellular protein transport;pro…	galactosylgalactosylxylosylprotein 3-beta-glucuronosyltransferase activity;glucuronosyltransferase activity;metal ion binding;protein phosphatase activator activity	cis-Golgi network;extracellular exosome;Golgi apparatus;Golgi membrane;integral component of membrane;membrane	Glycosaminoglycan biosynthesis - chondroitin sulfate / dermatan sulfate;Glycosaminoglycan biosynthesis - heparan sulfate / heparin;Metabolic pathways			12	12	12	37.3	37.3	37.3	37.121	0	85.541	716100000	67	0.49094	1	1.48505	1.12668	sp|O94766|B3GA3_HUMAN;tr|G3V150|G3V150_HUMAN;tr|E9PNA1|E9PNA1_HUMAN;tr|A0A087WXU9|A0A087WXU9_HUMAN;sp|Q9NPZ5|B3GA2_HUMAN	sp|O94766|B3GA3_HUMAN;tr|G3V150|G3V150_HUMAN	674	O94766	B3GA3_HUMAN	Galactosylgalactosylxylosylprotein 3-beta-glucuronosyltransferase 3		B3GAT3
21.3118	20.981	20.8362	19.7212	19.2069	19.7974				cellular response to interleukin-1;membrane protein ectodomain proteolysis;mRNA splice site selection;mRNA splicing, via spliceosome;negative regulation of mRNA splicing, via spliceosome;osteoblast differentiation;positive regulation of mRNA splicing, via spliceosome;positive regulation of transcription from RNA polymerase II promoter;protein homooligomerization;protein oligomerization;regulation…	chromatin binding;core promoter binding;identical protein binding;mRNA binding;protein domain specific binding;RNA binding;single-stranded RNA binding	catalytic step 2 spliceosome;extracellular exosome;extracellular space;intracellular ribonucleoprotein complex;membrane;nuclear euchromatin;nucleoplasm;nucleus;supraspliceosomal complex	Spliceosome			6	6	6	17.1	17.1	17.1	42.331	0	48.361	330240000	18	2.49016	1	1.46785	6.30514	sp|P38159|RBMX_HUMAN;tr|H0Y6E7|H0Y6E7_HUMAN;tr|H3BT71|H3BT71_HUMAN;tr|H3BR27|H3BR27_HUMAN;sp|Q96E39|RMXL1_HUMAN;tr|H3BNC1|H3BNC1_HUMAN;tr|H3BUY5|H3BUY5_HUMAN;sp|O75526|RMXL2_HUMAN;sp|Q8N7X1|RMXL3_HUMAN	sp|P38159|RBMX_HUMAN;tr|H0Y6E7|H0Y6E7_HUMAN;tr|H3BT71|H3BT71_HUMAN;tr|H3BR27|H3BR27_HUMAN;sp|Q96E39|RMXL1_HUMAN	1500	P38159	RBMX_HUMAN	RNA-binding motif protein, X chromosome		RBMX
20.7326	19.4912	20.2938	18.6824	17.6661	19.7735				aspartate transport;ATP biosynthetic process;cellular respiration;gluconeogenesis;L-glutamate transport;malate-aspartate shuttle;mitochondrial transport;response to calcium ion	acidic amino acid transmembrane transporter activity;calcium ion binding;L-aspartate transmembrane transporter activity;L-glutamate transmembrane transporter activity;transporter activity	integral component of membrane;integral component of plasma membrane;mitochondrial inner membrane;mitochondrion				17	12	12	35.7	28	28	74.175	0	76.692	367500000	37	0.968308	1	1.46517	2.0672	sp|Q9UJS0|CMC2_HUMAN;tr|R4GN64|R4GN64_HUMAN	sp|Q9UJS0|CMC2_HUMAN	5062	Q9UJS0	CMC2_HUMAN	Calcium-binding mitochondrial carrier protein Aralar2		SLC25A13
17.3857	17.4529	18.3423	15.6633	14.2357	18.9002					RNA binding					7	7	7	30.6	30.6	30.6	34.861	0	15.79	67250000	11	0.443743	1	1.46056	1.03301	tr|E5RJN7|E5RJN7_HUMAN;tr|A0A0A0MTC4|A0A0A0MTC4_HUMAN;tr|A0A0A0MTD1|A0A0A0MTD1_HUMAN;tr|F8VPI7|F8VPI7_HUMAN;tr|E7EPX0|E7EPX0_HUMAN;tr|A0A0A0MTC6|A0A0A0MTC6_HUMAN;tr|E7EVJ4|E7EVJ4_HUMAN;tr|E9PH62|E9PH62_HUMAN;tr|A0A0A0MTC5|A0A0A0MTC5_HUMAN;sp|Q9NUL3|STAU2_HUMAN;tr|G5EA18|G5EA18_HUMAN;tr|E7EVI1|E7EVI1_HUMAN;tr|E5RJ67|E5RJ67_HUMAN;tr|H0YBY0|H0YBY0_HUMAN;tr|E5RFK1|E5RFK1_HUMAN	tr|E5RJN7|E5RJN7_HUMAN;tr|A0A0A0MTC4|A0A0A0MTC4_HUMAN;tr|A0A0A0MTD1|A0A0A0MTD1_HUMAN;tr|F8VPI7|F8VPI7_HUMAN;tr|E7EPX0|E7EPX0_HUMAN;tr|A0A0A0MTC6|A0A0A0MTC6_HUMAN;tr|E7EVJ4|E7EVJ4_HUMAN;tr|E9PH62|E9PH62_HUMAN;tr|A0A0A0MTC5|A0A0A0MTC5_HUMAN;sp|Q9NUL3|STAU2_HUMAN;tr|G5EA18|G5EA18_HUMAN;tr|E7EVI1|E7EVI1_HUMAN;tr|E5RJ67|E5RJ67_HUMAN	4731	E5RJN7	E5RJN7_HUMAN			STAU2
20.9285	20.1169	1	19.1734	17.494	1				mitochondrial ATP synthesis coupled proton transport;mitochondrial electron transport, cytochrome c to oxygen;respiratory gaseous exchange	cytochrome-c oxidase activity;metal ion binding	extracellular exosome;mitochondrial inner membrane;mitochondrial respiratory chain complex IV;mitochondrion	Alzheimer disease;Cardiac muscle contraction;Huntington disease;Metabolic pathways;Non-alcoholic fatty liver disease (NAFLD);Oxidative phosphorylation;Parkinson disease;Thermogenesis			4	4	4	28.7	28.7	28.7	13.696	0.00021617	5.1129	49470000	4	0.0578949	1	1.45936	0.167376	sp|P10606|COX5B_HUMAN	sp|P10606|COX5B_HUMAN	1022	P10606	COX5B_HUMAN	Cytochrome c oxidase subunit 5B, mitochondrial		COX5B
20.8164	20.1462	21.3831	19.1519	19.129	19.6983						fibrillar center;intracellular membrane-bounded organelle				3	3	3	19.1	19.1	19.1	32.57	0	15.103	123550000	10	1.64732	1	1.45551	3.61153	tr|A0A0A0MT32|A0A0A0MT32_HUMAN;sp|P38571|LICH_HUMAN;tr|Q5T073|Q5T073_HUMAN;tr|Q5T770|Q5T770_HUMAN	tr|A0A0A0MT32|A0A0A0MT32_HUMAN;sp|P38571|LICH_HUMAN;tr|Q5T073|Q5T073_HUMAN	1502	A0A0A0MT32	A0A0A0MT32_HUMAN			LIPA
18.7679	17.7429	17.7398	16.3552	17.5696	15.9778				autophagy;cell death;cellular response to unfolded protein;defense response to Gram-negative bacterium;G2/M transition of mitotic cell cycle;Golgi organization;Golgi ribbon formation;Golgi to plasma membrane protein transport;innate immune response;negative regulation of I-kappaB kinase/NF-kappaB signaling;negative regulation of receptor recycling;parkin-mediated stimulation of mitophagy in respo…	identical protein binding;K63-linked polyubiquitin modification-dependent protein binding;metal ion binding;polyubiquitin modification-dependent protein binding;protein binding, bridging;protein C-terminus binding;Rab GTPase binding	autophagosome;cytoplasm;cytoplasmic vesicle;cytosol;Golgi apparatus;Golgi membrane;nucleoplasm;nucleus;perinuclear region of cytoplasm;recycling endosome membrane;trans-Golgi network	Mitophagy - animal			4	4	4	9.5	9.5	9.5	65.92	0	24.532	82090000	10	1.1559	1	1.44937	2.45803	sp|Q96CV9|OPTN_HUMAN;tr|A0A087WY28|A0A087WY28_HUMAN;tr|H7C1H4|H7C1H4_HUMAN	sp|Q96CV9|OPTN_HUMAN	3831	Q96CV9	OPTN_HUMAN	Optineurin		OPTN
18.8893	19.0356	18.4061	16.5581	18.7351	16.6911					RNA binding	integral component of membrane;nuclear membrane;nucleolus				24	24	24	23.8	23.8	23.8	143.7	0	146.95	1483600000	114	0.927904	1	1.44894	1.98549	sp|Q5JTH9|RRP12_HUMAN;tr|A0A087X1U8|A0A087X1U8_HUMAN;tr|A0A087X0G0|A0A087X0G0_HUMAN;tr|H7C1M8|H7C1M8_HUMAN	sp|Q5JTH9|RRP12_HUMAN	2827	Q5JTH9	RRP12_HUMAN	RRP12-like protein		RRP12
20.4835	18.3865	19.9875	17.0687	18.1824	19.2689				cell cycle;cell division;cell proliferation;signal transduction	identical protein binding;microtubule binding	cytoplasm;microtubule cytoskeleton;microtubule plus-end				5	4	4	23.2	20.8	20.8	37.031	0	12.476	119580000	13	0.739657	1	1.44582	1.61266	sp|Q15555|MARE2_HUMAN;tr|M0QX52|M0QX52_HUMAN;tr|K7EL66|K7EL66_HUMAN;tr|K7ERD8|K7ERD8_HUMAN	sp|Q15555|MARE2_HUMAN	2614	Q15555	MARE2_HUMAN	Microtubule-associated protein RP/EB family member 2		MAPRE2
19.0997	16.6485	18.6979	16.7293	16.0441	17.3381				7-methylguanosine mRNA capping;aging;apoptotic process;bone mineralization;cell proliferation;central nervous system myelin formation;chromosome segregation;embryonic cleavage;embryonic organ development;erythrocyte maturation;extracellular matrix organization;global genome nucleotide-excision repair;hair cell differentiation;hair follicle maturation;hematopoietic stem cell differentiation;in ute…	4 iron, 4 sulfur cluster binding;5'-3' DNA helicase activity;ATP binding;ATP-dependent DNA helicase activity;DNA binding;DNA-dependent ATPase activity;metal ion binding;protein C-terminus binding;protein N-terminus binding	core TFIIH complex;cytoplasm;cytosol;holo TFIIH complex;MMXD complex;nucleoplasm;nucleus;spindle;transcription factor TFIID complex	Basal transcription factors;Nucleotide excision repair			8	8	8	17.4	17.4	17.4	86.908	0	59.024	168970000	27	0.78816	1	1.44486	1.70775	sp|P18074|ERCC2_HUMAN;tr|E7EVE9|E7EVE9_HUMAN;tr|A8MX75|A8MX75_HUMAN;tr|K7EKF3|K7EKF3_HUMAN;tr|K7EIT8|K7EIT8_HUMAN;tr|K7ENL1|K7ENL1_HUMAN;tr|B4E0F6|B4E0F6_HUMAN	sp|P18074|ERCC2_HUMAN;tr|E7EVE9|E7EVE9_HUMAN;tr|A8MX75|A8MX75_HUMAN	1171	P18074	ERCC2_HUMAN	General transcription and DNA repair factor IIH helicase subunit XPD	FIIH subunit XPD	ERCC2
24.8868	21.9371	23.2468	22.2062	20.7265	22.8148				leukocyte migration;negative regulation of cell-cell adhesion mediated by cadherin;positive regulation of cell proliferation;positive regulation of stem cell proliferation;positive regulation of transcription from RNA polymerase II promoter;signal transduction involved in regulation of gene expression;stem cell differentiation;ureteric bud development	cadherin binding involved in cell-cell adhesion;protein complex binding	apical plasma membrane;basolateral plasma membrane;bicellular tight junction;cell surface;extracellular exosome;integral component of plasma membrane;lateral plasma membrane;plasma membrane				8	8	8	36	36	36	34.932	0	149.07	1533900000	76	0.613266	1	1.44109	1.36624	sp|P16422|EPCAM_HUMAN;tr|B5MCA4|B5MCA4_HUMAN;tr|C9JKY3|C9JKY3_HUMAN	sp|P16422|EPCAM_HUMAN;tr|B5MCA4|B5MCA4_HUMAN;tr|C9JKY3|C9JKY3_HUMAN	1136	P16422	EPCAM_HUMAN	Epithelial cell adhesion molecule	p-CAM	EPCAM
23.433	18.7111	19.6108	20.9853	17.212	19.2453				mRNA transport;negative regulation of vascular endothelial growth factor production;positive regulation of protein import into nucleus;protein export from nucleus;protein import into nucleus;protein import into nucleus, translocation;protein localization to nuclear pore	identical protein binding;nucleocytoplasmic transporter activity;protein transporter activity;Ran GTPase binding	cytosol;extracellular exosome;nuclear inner membrane;nuclear membrane;nuclear outer membrane;nuclear pore central transport channel;nucleoplasm				5	5	5	56.7	56.7	56.7	14.478	0	19.447	122050000	11	0.325995	1	1.43742	0.793177	sp|P61970|NTF2_HUMAN;tr|H3BRV9|H3BRV9_HUMAN	sp|P61970|NTF2_HUMAN;tr|H3BRV9|H3BRV9_HUMAN	1948	P61970	NTF2_HUMAN	Nuclear transport factor 2 {ECO:0000303|PubMed:7744965}	TF-2	NUTF2
19.1696	19.0962	19.1103	16.0228	18.1533	18.8953				cell adhesion;cell-matrix adhesion;signal transduction	laminin binding;laminin receptor activity;protein C-terminus binding;transmembrane signaling receptor activity	external side of plasma membrane;extracellular exosome;extracellular matrix;extracellular region;integral component of plasma membrane;plasma membrane				9	9	9	22.6	22.6	22.6	67.404	0	26.428	176070000	18	0.766974	1	1.43487	1.66615	sp|P50895|BCAM_HUMAN;tr|A0A087WXM8|A0A087WXM8_HUMAN;tr|K7ENU8|K7ENU8_HUMAN	sp|P50895|BCAM_HUMAN;tr|A0A087WXM8|A0A087WXM8_HUMAN	1720	P50895	BCAM_HUMAN	Basal cell adhesion molecule		BCAM
19.109	15.0705	18.3692	17.4227	14.3931	16.453				carbohydrate metabolic process;glycosaminoglycan catabolic process;hyaluronan catabolic process;neutrophil degranulation	beta-glucuronidase activity;hydrolase activity, hydrolyzing O-glycosyl compounds;protein domain specific binding;receptor binding	azurophil granule lumen;extracellular exosome;extracellular region;extracellular space;ficolin-1-rich granule lumen;intracellular membrane-bounded organelle;lysosomal lumen;lysosome;membrane	Drug metabolism - other enzymes;Glycosaminoglycan degradation;Lysosome;Metabolic pathways;Pentose and glucuronate interconversions;Porphyrin and chlorophyll metabolism			6	6	6	13.5	13.5	13.5	74.731	0	13.561	43796000	9	0.393946	1	1.42668	0.932873	sp|P08236|BGLR_HUMAN;tr|F8WBK6|F8WBK6_HUMAN;tr|F2Z3L6|F2Z3L6_HUMAN	sp|P08236|BGLR_HUMAN	958	P08236	BGLR_HUMAN	Beta-glucuronidase		GUSB
21.0265	19.1389	19.9574	19.2538	18.4918	18.107				branched-chain amino acid catabolic process;brown fat cell differentiation;thymine catabolic process;thymine metabolic process;valine catabolic process;valine metabolic process	fatty-acyl-CoA binding;malonate-semialdehyde dehydrogenase (acetylating) activity;methylmalonate-semialdehyde dehydrogenase (acylating) activity;RNA binding	extracellular exosome;mitochondrial matrix;mitochondrion;nucleoplasm	beta-Alanine metabolism;Carbon metabolism;Inositol phosphate metabolism;Metabolic pathways;Propanoate metabolism;Valine, leucine and isoleucine degradation			12	12	12	28.6	28.6	28.6	57.839	0	39.8	225670000	30	1.0414	1	1.42345	2.21707	sp|Q02252|MMSA_HUMAN;tr|G3V4Z4|G3V4Z4_HUMAN	sp|Q02252|MMSA_HUMAN;tr|G3V4Z4|G3V4Z4_HUMAN	2156	Q02252	MMSA_HUMAN	Methylmalonate-semialdehyde dehydrogenase [acylating], mitochondrial	alonate-semialdehyde dehydrogenase [acylating];MSDH	ALDH6A1
27.4147	28.0561	27.7597	26.0826	26.5846	26.296					DNA binding;protein heterodimerization activity	nucleosome;nucleus				5	5	1	47	47	24.2	14.914	0	179.58	15071000000	138	2.42066	1	1.42242	6.03694	tr|K7EK07|K7EK07_HUMAN;sp|P84243|H33_HUMAN	tr|K7EK07|K7EK07_HUMAN;sp|P84243|H33_HUMAN	2101	K7EK07	K7EK07_HUMAN	Histone H3 {ECO:0000256|RuleBase:RU004471}		H3F3B
18.8475	16.9184	18.396	17.525	15.7578	16.6121				carbohydrate metabolic process;O-glycan processing;protein O-linked glycosylation	carbohydrate binding;metal ion binding;polypeptide N-acetylgalactosaminyltransferase activity	extracellular exosome;Golgi membrane;integral component of membrane;membrane	Metabolic pathways;Mucin type O-glycan biosynthesis			6	6	6	11.9	11.9	11.9	75.388	0	13.237	68111000	8	0.853395	1	1.4223	1.83658	sp|Q86SF2|GALT7_HUMAN;tr|H0YAK0|H0YAK0_HUMAN;tr|H0YAH3|H0YAH3_HUMAN;tr|E9PBY3|E9PBY3_HUMAN	sp|Q86SF2|GALT7_HUMAN;tr|H0YAK0|H0YAK0_HUMAN;tr|H0YAH3|H0YAH3_HUMAN	3202	Q86SF2	GALT7_HUMAN	N-acetylgalactosaminyltransferase 7		GALNT7
18.2866	16.8037	16.7324	17.2547	16.6847	13.6425				axon extension;cellular process;dendrite development;establishment of monopolar cell polarity;microtubule bundle formation;mitochondrion transport along microtubule;negative regulation of intracellular transport;positive regulation of axon extension	microtubule binding;structural molecule activity	cell junction;cytosol;dendritic spine;microtubule;microtubule associated complex;photoreceptor outer segment;plasma membrane;postsynaptic density				21	21	20	13	13	12.6	270.63	0	66.512	331050000	78	0.502231	1	1.4136	1.14895	sp|P46821|MAP1B_HUMAN;tr|D6RA40|D6RA40_HUMAN;tr|D6RA32|D6RA32_HUMAN	sp|P46821|MAP1B_HUMAN	1603	P46821	MAP1B_HUMAN	Microtubule-associated protein 1B	AP-1B	MAP1B
20.7548	17.9144	20.6035	19.7043	15.6773	19.6895				mRNA splicing, via spliceosome;RNA processing;RNA splicing;RNA splicing, via transesterification reactions	U4 snRNA binding;U6 snRNA binding	Cajal body;nuclear speck;nucleoplasm;nucleus;spliceosomal complex;spliceosomal snRNP complex;U4/U6 snRNP;U4/U6 x U5 tri-snRNP complex	Spliceosome			11	11	11	29.3	29.3	29.3	58.449	0	42.315	658220000	65	0.358707	1	1.40056	0.860942	sp|O43172|PRP4_HUMAN	sp|O43172|PRP4_HUMAN	391	O43172	PRP4_HUMAN	U4/U6 small nuclear ribonucleoprotein Prp4		PRPF4
23.3335	22.8143	23.4875	22.0461	21.4605	21.9365				base-excision repair;cell division;chondrocyte differentiation;chondrocyte proliferation;chromatin organization;chromosome breakage;chromosome condensation;DNA damage response, detection of DNA damage;endodermal cell differentiation;epithelial to mesenchymal transition;fat cell differentiation;heterochromatin assembly;histone H2A-S139 phosphorylation;mesenchymal cell differentiation;mesodermal ce…	5'-deoxyribose-5-phosphate lyase activity;AT DNA binding;C2H2 zinc finger domain binding;cAMP response element binding;core promoter binding;DNA binding;DNA binding, bending;DNA-(apurinic or apyrimidinic site) lyase activity;DNA-dependent protein kinase activity;MH1 domain binding;MH2 domain binding;nucleosomal DNA binding;SMAD binding;transcription factor binding;transcription regulatory region …	nuclear chromosome;nucleoplasm;nucleus;protein-DNA complex;senescence-associated heterochromatin focus;SMAD protein complex	MicroRNAs in cancer;Transcriptional misregulation in cancer			4	4	4	56.9	56.9	56.9	11.832	0	110.53	1106800000	66	2.1695	1	1.3974	5.14484	sp|P52926|HMGA2_HUMAN;tr|F5H2U8|F5H2U8_HUMAN;tr|F5H2A4|F5H2A4_HUMAN;tr|F5H6H0|F5H6H0_HUMAN	sp|P52926|HMGA2_HUMAN;tr|F5H2U8|F5H2U8_HUMAN;tr|F5H2A4|F5H2A4_HUMAN;tr|F5H6H0|F5H6H0_HUMAN	1786	P52926	HMGA2_HUMAN	High mobility group protein HMGI-C		HMGA2
23.9721	22.3057	22.788	22.9359	19.7246	22.2374				adenylate cyclase-activating dopamine receptor signaling pathway;cardiac muscle cell apoptotic process;cell proliferation;cellular response to catecholamine stimulus;cellular response to glucagon stimulus;cellular response to hypoxia;cellular response to prostaglandin E stimulus;G-protein coupled acetylcholine receptor signaling pathway;G-protein coupled receptor signaling pathway;phospholipase C…	alkylglycerophosphoethanolamine phosphodiesterase activity;GTPase activity;GTPase binding;protein complex binding;signal transducer activity;spectrin binding;type 1 angiotensin receptor binding	cell body;cytosol;dendrite;extracellular exosome;extracellular vesicle;heterotrimeric G-protein complex;intracellular;lysosomal membrane;membrane;myelin sheath;photoreceptor disc membrane;photoreceptor inner segment;photoreceptor outer segment membrane;plasma membrane	Alcoholism;Apelin signaling pathway;Chemokine signaling pathway;Cholinergic synapse;Circadian entrainment;Dopaminergic synapse;GABAergic synapse;Glutamatergic synapse;Human cytomegalovirus infection;Human immunodeficiency virus 1 infection;Kaposi sarcoma-associated herpesvirus infection;Morphine addiction;Olfactory transduction;Pathways in cancer;Phototransduction;PI3K-Akt signaling pathway;Ras s…			12	7	7	53.2	35	35	37.377	0	162.52	991940000	37	0.564163	1	1.38933	1.27044	sp|P62873|GBB1_HUMAN;tr|B1AKQ8|B1AKQ8_HUMAN;tr|F6UT28|F6UT28_HUMAN;tr|F6X3N5|F6X3N5_HUMAN;tr|B3KVK2|B3KVK2_HUMAN;tr|F5H8J8|F5H8J8_HUMAN;tr|F5H100|F5H100_HUMAN;tr|F5H0S8|F5H0S8_HUMAN;tr|E9PCP0|E9PCP0_HUMAN;sp|P16520|GBB3_HUMAN	sp|P62873|GBB1_HUMAN;tr|B1AKQ8|B1AKQ8_HUMAN;tr|F6UT28|F6UT28_HUMAN;tr|F6X3N5|F6X3N5_HUMAN	2002	P62873	GBB1_HUMAN	Guanine nucleotide-binding protein G(I)/G(S)/G(T) subunit beta-1		GNB1
20.6196	18.5239	18.9502	18.3092	17.4179	18.2026				aging;COPII vesicle coating;ER to Golgi vesicle-mediated transport;immune response;neutrophil degranulation;positive regulation of apoptotic signaling pathway;positive regulation of proteolysis involved in cellular protein catabolic process;proteolysis;proteolysis involved in cellular protein catabolic process;response to organic substance;T cell mediated cytotoxicity	chaperone binding;chloride ion binding;cysteine-type endopeptidase activity;cysteine-type peptidase activity;identical protein binding;peptidase activator activity involved in apoptotic process;phosphatase binding;protein self-association;serine-type endopeptidase activity	azurophil granule lumen;centrosome;COPII-coated ER to Golgi transport vesicle;endoplasmic reticulum lumen;endoplasmic reticulum-Golgi intermediate compartment membrane;extracellular exosome;extracellular region;extracellular space;Golgi membrane;intracellular membrane-bounded organelle;lysosome;membrane;nucleoplasm	Apoptosis;Lysosome			7	7	7	22	22	22	51.853	0	17.921	94136000	11	0.928735	1	1.38802	1.98716	sp|P53634|CATC_HUMAN;tr|H0YCY8|H0YCY8_HUMAN	sp|P53634|CATC_HUMAN;tr|H0YCY8|H0YCY8_HUMAN	1803	P53634	CATC_HUMAN	Dipeptidyl peptidase 1		CTSC
19.7858	1	19.0303	16.6614	1	18.0086				ribosomal large subunit biogenesis;rRNA processing		cytoplasm;nucleolus				4	4	4	21.1	21.1	21.1	42.07	0	14.226	52592000	12	0.0582043	1	1.38205	0.168221	sp|Q9H6Y2|WDR55_HUMAN;tr|D6RGJ8|D6RGJ8_HUMAN;tr|G3V1J0|G3V1J0_HUMAN	sp|Q9H6Y2|WDR55_HUMAN;tr|D6RGJ8|D6RGJ8_HUMAN	4498	Q9H6Y2	WDR55_HUMAN	WD repeat-containing protein 55		WDR55
21.5158	20.3065	20.8103	20.3279	19.0002	19.1706				lipid metabolic process		lysosome				8	8	8	25.7	25.7	25.7	41.796	0	46.092	279470000	20	1.18869	1	1.37795	2.52861	tr|E7EMM4|E7EMM4_HUMAN;sp|Q13510|ASAH1_HUMAN	tr|E7EMM4|E7EMM4_HUMAN;sp|Q13510|ASAH1_HUMAN	2373	E7EMM4	E7EMM4_HUMAN			ASAH1
20.7934	19.0985	19.6573	18.066	18.6476	18.7446										4	4	4	22.8	22.8	22.8	25.085	0	11.985	61918000	6	1.18327	1	1.36367	2.5169	tr|H7C5G1|H7C5G1_HUMAN;sp|Q2TAA2|IAH1_HUMAN;tr|C9JDY4|C9JDY4_HUMAN;tr|C9J5J2|C9J5J2_HUMAN;tr|C9JE02|C9JE02_HUMAN	tr|H7C5G1|H7C5G1_HUMAN;sp|Q2TAA2|IAH1_HUMAN	2721	H7C5G1	H7C5G1_HUMAN			IAH1
18.8292	16.9511	19.3352	16.9835	16.631	17.4153					ATP binding;biotin carboxylase activity;metal ion binding	mitochondrion				13	13	13	33.6	33.6	33.6	68.331	0	66.873	383310000	31	0.831034	1	1.36189	1.79228	tr|E9PHF7|E9PHF7_HUMAN;sp|Q96RQ3|MCCA_HUMAN;tr|F5GYT8|F5GYT8_HUMAN;tr|E9PG35|E9PG35_HUMAN;tr|G5E9X5|G5E9X5_HUMAN	tr|E9PHF7|E9PHF7_HUMAN;sp|Q96RQ3|MCCA_HUMAN;tr|F5GYT8|F5GYT8_HUMAN;tr|E9PG35|E9PG35_HUMAN;tr|G5E9X5|G5E9X5_HUMAN	4022	E9PHF7	E9PHF7_HUMAN			MCCC1
19.4245	19.5543	21.2886	19.2658	16.5584	20.3614				chromatin silencing	DNA binding;protein heterodimerization activity	extracellular exosome;nuclear chromatin;nucleosome;nucleus	Alcoholism;Necroptosis;Systemic lupus erythematosus			6	1	0	55.5	22.7	0	13.936	0	83.902	632290000	21	0.458762	1	1.36058	1.06293	sp|Q99878|H2A1J_HUMAN;sp|Q96KK5|H2A1H_HUMAN;sp|Q9BTM1|H2AJ_HUMAN;sp|Q93077|H2A1C_HUMAN;sp|Q7L7L0|H2A3_HUMAN;sp|P20671|H2A1D_HUMAN;sp|P0C0S8|H2A1_HUMAN;sp|P04908|H2A1B_HUMAN;tr|H0YFX9|H0YFX9_HUMAN;sp|P16104|H2AX_HUMAN	sp|Q99878|H2A1J_HUMAN;sp|Q96KK5|H2A1H_HUMAN;sp|Q9BTM1|H2AJ_HUMAN;sp|Q93077|H2A1C_HUMAN;sp|Q7L7L0|H2A3_HUMAN;sp|P20671|H2A1D_HUMAN;sp|P0C0S8|H2A1_HUMAN;sp|P04908|H2A1B_HUMAN;tr|H0YFX9|H0YFX9_HUMAN;sp|P16104|H2AX_HUMAN	885	Q99878	H2A1J_HUMAN	Histone H2A type 1-J		HIST1H2AJ
23.7557	1	24.2127	21.6604	1	22.2319				nucleosome assembly	nucleosomal DNA binding;protein heterodimerization activity	nucleosome;nucleus				4	1	1	25	8.1	8.1	15.43	0	17.836	824320000	31	0.0447626	1	1.35868	0.131048	tr|Q5TEC6|Q5TEC6_HUMAN	tr|Q5TEC6|Q5TEC6_HUMAN	5616	Q5TEC6	Q5TEC6_HUMAN	Histone H3 {ECO:0000256|RuleBase:RU004471}
17.7585	15.9011	19.4648	16.0396	15.1642	17.8489				oxidative phosphorylation;regulation of transcription, DNA-templated;transcription from mitochondrial promoter	DNA polymerase processivity factor activity;RNA binding	intracellular ribonucleoprotein complex;mitochondrial matrix;mitochondrial nucleoid;mitochondrion				8	8	8	27.8	27.8	27.8	41.676	0	37.26	262360000	33	0.450237	1	1.35726	1.04596	sp|Q96QE5|TEFM_HUMAN;tr|J3KTG7|J3KTG7_HUMAN	sp|Q96QE5|TEFM_HUMAN	4008	Q96QE5	TEFM_HUMAN	Transcription elongation factor, mitochondrial		TEFM
21.3344	19.4237	19.9725	19.3902	19.0188	18.276				cellular protein metabolic process;fucose metabolic process;glycoside catabolic process;neutrophil degranulation;post-translational protein modification;regulation of entry of bacterium into host cell;response to bacterium	alpha-L-fucosidase activity	azurophil granule lumen;endoplasmic reticulum lumen;extracellular exosome;extracellular region;extracellular space	Other glycan degradation			8	8	8	17.8	17.8	17.8	54.066	0	55.158	210260000	20	0.963182	1	1.34855	2.0568	sp|Q9BTY2|FUCO2_HUMAN;tr|Q7Z6V2|Q7Z6V2_HUMAN	sp|Q9BTY2|FUCO2_HUMAN	4217	Q9BTY2	FUCO2_HUMAN	Plasma alpha-L-fucosidase		FUCA2
17.2366	18.3893	17.2862	15.341	15.9678	17.5753				apoptotic process;cell cycle;mRNA splicing, via spliceosome;positive regulation of cell migration;positive regulation of cell proliferation;regulation of transcription, DNA-templated;transcription, DNA-templated	core promoter binding;ligand-dependent nuclear receptor transcription coactivator activity;RNA binding;transcription coactivator activity;transcription corepressor activity	nucleoplasm;perinuclear region of cytoplasm				15	15	15	14.2	14.2	14.2	132.82	0	40.856	221850000	31	0.812914	1	1.34263	1.75649	sp|Q8IX12|CCAR1_HUMAN;tr|A0A0C4DGG8|A0A0C4DGG8_HUMAN;tr|F5H2E6|F5H2E6_HUMAN;tr|F5H1H2|F5H1H2_HUMAN;tr|F5H3E1|F5H3E1_HUMAN;tr|F5H7M9|F5H7M9_HUMAN;tr|H0YFJ7|H0YFJ7_HUMAN	sp|Q8IX12|CCAR1_HUMAN;tr|A0A0C4DGG8|A0A0C4DGG8_HUMAN	3315	Q8IX12	CCAR1_HUMAN	Cell division cycle and apoptosis regulator protein 1		CCAR1
20.2275	19.3388	21.2907	19.7721	15.5311	21.5266										2	2	2	27.7	27.7	27.7	12.586	0.0060785	2.3692	55584000	4	0.290811	1	1.34236	0.719001	tr|E9PMF1|E9PMF1_HUMAN;tr|E9PPI6|E9PPI6_HUMAN;tr|E9PMM8|E9PMM8_HUMAN;tr|E9PJH1|E9PJH1_HUMAN;tr|E9PIA0|E9PIA0_HUMAN;sp|Q9BUB5|MKNK1_HUMAN	tr|E9PMF1|E9PMF1_HUMAN;tr|E9PPI6|E9PPI6_HUMAN;tr|E9PMM8|E9PMM8_HUMAN;tr|E9PJH1|E9PJH1_HUMAN;tr|E9PIA0|E9PIA0_HUMAN;sp|Q9BUB5|MKNK1_HUMAN	5520	E9PMF1
20.2563	16.5396	18.5803	17.8099	15.8522	17.6876				negative regulation by host of symbiont molecular function;positive regulation of exocytosis;protein transport;regulation of protein localization;retrograde transport, endosome to Golgi	GDP binding;GTP binding;GTPase activity;identical protein binding	cytosol;endoplasmic reticulum membrane;extracellular exosome;late endosome;lysosome;melanosome;phagocytic vesicle;phagocytic vesicle membrane;plasma membrane;trans-Golgi network membrane;transport vesicle	Measles			4	4	4	28.4	28.4	28.4	22.837	0	13.421	33056000	5	0.465365	1	1.34214	1.07605	sp|P51151|RAB9A_HUMAN	sp|P51151|RAB9A_HUMAN	1732	P51151	RAB9A_HUMAN	Ras-related protein Rab-9A		RAB9A
23.0474	21.4672	1	20.0899	20.4003	1				antigen processing and presentation of exogenous peptide antigen via MHC class II;cell cycle;cell division;clathrin coat assembly;clathrin-dependent endocytosis;intracellular protein transport;low-density lipoprotein particle clearance;low-density lipoprotein particle receptor catabolic process;membrane organization;microtubule-based movement	clathrin heavy chain binding;GTPase binding;peptide binding;protein complex binding;structural molecule activity	clathrin coat;clathrin coat of coated pit;clathrin coat of trans-Golgi network vesicle;clathrin complex;clathrin vesicle coat;clathrin-coated endocytic vesicle;cytoplasmic vesicle;cytosol;endolysosome membrane;membrane;plasma membrane;spindle;synaptic vesicle membrane;trans-Golgi network membrane	Bacterial invasion of epithelial cells;Endocrine and other factor-regulated calcium reabsorption;Endocytosis;Huntington disease;Lysosome;Synaptic vesicle cycle			4	4	4	10.9	10.9	10.9	27.076	0.0026677	2.9128	255310000	2	0.0480345	1	1.34146	0.14018	sp|P09496|CLCA_HUMAN;tr|F8WF69|F8WF69_HUMAN;tr|C9J8P9|C9J8P9_HUMAN	sp|P09496|CLCA_HUMAN;tr|F8WF69|F8WF69_HUMAN	991	P09496	CLCA_HUMAN	Clathrin light chain A	ca	CLTA
17.9316	17.4879	20.4016	16.5916	17.4163	17.7918										6	6	6	11.3	11.3	11.3	73.041	0	11.566	121530000	15	0.618992	1	1.34049	1.37739	tr|F8W9X7|F8W9X7_HUMAN;sp|Q567U6|CCD93_HUMAN;tr|H7C050|H7C050_HUMAN	tr|F8W9X7|F8W9X7_HUMAN;sp|Q567U6|CCD93_HUMAN	2792	F8W9X7	F8W9X7_HUMAN			CCDC93
18.4195	15.573	18.4337	17.7227	12.6641	18.0385				maturation of SSU-rRNA;rRNA processing	RNA binding	cytosol;nucleolus;nucleoplasm;small-subunit processome	Ribosome biogenesis in eukaryotes			23	23	23	38.9	38.9	38.9	87.977	0	118.14	656740000	81	0.268962	1	1.33361	0.672148	sp|Q9BVJ6|UT14A_HUMAN;tr|X6RJY0|X6RJY0_HUMAN;sp|Q5TAP6|UT14C_HUMAN	sp|Q9BVJ6|UT14A_HUMAN	4252	Q9BVJ6	UT14A_HUMAN	U3 small nucleolar RNA-associated protein 14 homolog A		UTP14A
22.5128	21.3503	20.7967	21.5091	18.5265	20.6244				mitochondrial translational elongation;mitochondrial translational termination	structural constituent of ribosome	mitochondrial inner membrane;mitochondrial large ribosomal subunit	Ribosome			2	2	2	38.5	38.5	38.5	7.6191	0	7.0104	164640000	20	0.583749	1	1.33324	1.30868	sp|O75394|RM33_HUMAN	sp|O75394|RM33_HUMAN	582	O75394	RM33_HUMAN	39S ribosomal protein L33, mitochondrial	33mt;RP-L33	MRPL33
25.5972	24.4608	23.8419	23.808	22.6431	23.4546				aerobic respiration;mitochondrial electron transport, ubiquinol to cytochrome c;oxidation-reduction process;oxidative phosphorylation;protein processing;response to activity;response to alkaloid	metalloendopeptidase activity;protein complex binding;ubiquinol-cytochrome-c reductase activity;ubiquitin protein ligase binding;zinc ion binding	cytosol;mitochondrial inner membrane;mitochondrial respiratory chain;mitochondrial respiratory chain complex III;mitochondrion;myelin sheath	Alzheimer disease;Cardiac muscle contraction;Huntington disease;Metabolic pathways;Non-alcoholic fatty liver disease (NAFLD);Oxidative phosphorylation;Parkinson disease;Thermogenesis			22	22	21	55.8	55.8	54.4	52.645	0	294.11	4119100000	165	1.00933	1	1.33137	2.15098	sp|P31930|QCR1_HUMAN	sp|P31930|QCR1_HUMAN	1410	P31930	QCR1_HUMAN	Cytochrome b-c1 complex subunit 1, mitochondrial		UQCRC1
17.0154	15.3934	14.3137	15.9914	12.4065	14.3414				cilium assembly;platelet degranulation;positive regulation of smooth muscle cell proliferation;prostaglandin secretion;response to drug;response to organic cyclic compound;response to organonitrogen compound;transmembrane transport	15-hydroxyprostaglandin dehydrogenase (NAD+) activity;ATP binding;ATPase activity, coupled to transmembrane movement of ions, phosphorylative mechanism;ATPase activity, coupled to transmembrane movement of substances;ATPase-coupled anion transmembrane transporter activity	basolateral plasma membrane;integral component of plasma membrane;membrane;plasma membrane;platelet dense granule membrane	ABC transporters;Antifolate resistance;Bile secretion;cAMP signaling pathway			6	6	6	6.8	6.8	6.8	149.52	0	8.9593	35788000	9	0.437949	1	1.32773	1.02144	sp|O15439|MRP4_HUMAN	sp|O15439|MRP4_HUMAN	377	O15439	MRP4_HUMAN	Multidrug resistance-associated protein 4		ABCC4
24.7347	22.4614	22.6009	22.257	21.1146	22.4454				mRNA 3'-end processing;mRNA export from nucleus;mRNA processing;mRNA splicing, via spliceosome;positive regulation of protein targeting to mitochondrion;regulation of autophagy of mitochondrion;RNA export from nucleus;RNA splicing;termination of RNA polymerase II transcription	metal ion binding;pre-mRNA 3'-splice site binding;RNA binding	Cajal body;catalytic step 2 spliceosome;nuclear speck;nucleoplasm;spliceosomal complex;U2AF	Shigellosis;Spliceosome			9	9	9	48.3	48.3	48.3	27.872	0	187.04	1346300000	65	0.717877	1	1.3267	1.5701	sp|Q01081|U2AF1_HUMAN;sp|Q8WU68|U2AF4_HUMAN;tr|M0QYK5|M0QYK5_HUMAN;tr|M0R2N4|M0R2N4_HUMAN;tr|K7EJH3|K7EJH3_HUMAN;tr|K7EJM7|K7EJM7_HUMAN	sp|Q01081|U2AF1_HUMAN	2127	Q01081	U2AF1_HUMAN	Splicing factor U2AF 35 kDa subunit		U2AF1
23.2764	20.4282	17.2186	18.7223	19.5632	18.6581				apoptotic process;autophagosome maturation;cell cycle;cell separation after cytokinesis;endosomal transport;macroautophagy;multivesicular body assembly;multivesicular body sorting pathway;multivesicular body-lysosome fusion;negative regulation of viral release from host cell;positive regulation of viral release from host cell;protein heterooligomerization;protein polymerization;protein transport;…	identical protein binding;phosphatidylcholine binding;protein homodimerization activity;ubiquitin-specific protease binding	cytoplasmic vesicle;cytosol;ESCRT III complex;extracellular exosome;intracellular;late endosome;late endosome membrane;plasma membrane	Endocytosis;Necroptosis			3	3	3	13.5	13.5	13.5	25.073	0.00081867	3.951	129730000	3	0.304401	1	1.32656	0.747827	sp|Q9Y3E7|CHMP3_HUMAN	sp|Q9Y3E7|CHMP3_HUMAN	5297	Q9Y3E7	CHMP3_HUMAN	Charged multivesicular body protein 3		CHMP3
20.0922	17.9751	19.4433	17.886	17.0737	18.5722				antigen processing and presentation of exogenous peptide antigen via MHC class I, TAP-dependent;antigen processing and presentation of exogenous peptide antigen via MHC class I, TAP-independent;antigen processing and presentation of peptide antigen via MHC class I;interferon-gamma-mediated signaling pathway;regulation of immune response;type I interferon signaling pathway;viral process	peptide antigen binding	cell surface;early endosome membrane;endoplasmic reticulum;ER to Golgi transport vesicle membrane;Golgi apparatus;Golgi membrane;integral component of lumenal side of endoplasmic reticulum membrane;membrane;MHC class I protein complex;phagocytic vesicle membrane;plasma membrane;recycling endosome membrane				11	2	2	40.3	9.4	9.4	40.274	0.00021575	5.0783	88877000	7	0.805468	1	1.32624	1.74181	sp|P30466|1B18_HUMAN	sp|P30466|1B18_HUMAN	1383	P30466	1B18_HUMAN	HLA class I histocompatibility antigen, B-18 alpha chain		HLA-B
24.379	23.3403	23.6957	22.748	22.5225	22.1675				hemopoiesis;positive regulation of cell proliferation	zinc ion binding	cell cortex				8	8	8	53.8	53.8	53.8	22.492	0	76.827	961270000	49	1.7204	1	1.32563	3.80407	sp|P52943|CRIP2_HUMAN;tr|H0YFA4|H0YFA4_HUMAN;tr|H0YHD8|H0YHD8_HUMAN	sp|P52943|CRIP2_HUMAN;tr|H0YFA4|H0YFA4_HUMAN;tr|H0YHD8|H0YHD8_HUMAN	1787	P52943	CRIP2_HUMAN	Cysteine-rich protein 2	RP-2	CRIP2
23.9498	22.2867	22.6798	22.0298	21.5263	21.3902				C21-steroid hormone biosynthetic process;cholesterol metabolic process;generation of precursor metabolites and energy;oxidation-reduction process;steroid biosynthetic process;sterol metabolic process;ubiquinone biosynthetic process	ferredoxin-NADP+ reductase activity;NADPH-adrenodoxin reductase activity	mitochondrial matrix;mitochondrion				30	30	2	67.2	67.2	4.9	53.836	0	247.97	1841800000	98	1.15623	1	1.32335	2.45874	sp|P22570|ADRO_HUMAN;tr|J3KS64|J3KS64_HUMAN	sp|P22570|ADRO_HUMAN	1246	P22570	ADRO_HUMAN	NADPH:adrenodoxin oxidoreductase, mitochondrial	drenodoxin reductase;R	FDXR
23.0312	20.8837	21.1231	20.4008	19.9739	20.6996				malate transmembrane transport;mitochondrial transport;oxaloacetate transport;phosphate ion transmembrane transport;succinate transmembrane transport;sulfate transport;thiosulfate transport;translation	antiporter activity;malate transmembrane transporter activity;oxaloacetate transmembrane transporter activity;structural constituent of ribosome;succinate transmembrane transporter activity;sulfate transmembrane transporter activity;thiosulfate transmembrane transporter activity	integral component of membrane;mitochondrial inner membrane;mitochondrion;nucleoplasm;ribosome				11	11	3	37.8	37.8	15.8	48.099	0	148.69	1072600000	93	0.863836	1	1.32122	1.85732	tr|B4DLN1|B4DLN1_HUMAN;sp|P52815|RM12_HUMAN;tr|F6QW41|F6QW41_HUMAN	tr|B4DLN1|B4DLN1_HUMAN	5478	B4DLN1	B4DLN1_HUMAN
22.0357	18.1114	1	18.1541	18.0301	1										1	1	1	29.7	29.7	29.7	7.0202	0.0024904	2.9832	20656000	1	0.0528005	1	1.32095	0.153384	tr|B8ZZF8|B8ZZF8_HUMAN;sp|Q9Y4Y9|LSM5_HUMAN	tr|B8ZZF8|B8ZZF8_HUMAN;sp|Q9Y4Y9|LSM5_HUMAN	5337	B8ZZF8	B8ZZF8_HUMAN			LSM5
20.659	20.6681	20.7882	19.2887	20.0478	18.8248				box H/ACA snoRNA 3'-end processing;cell proliferation;mRNA pseudouridine synthesis;positive regulation of establishment of protein localization to telomere;positive regulation of telomerase activity;positive regulation of telomerase RNA localization to Cajal body;positive regulation of telomere maintenance via telomerase;regulation of telomerase RNA localization to Cajal body;RNA processing;rRNA …	box H/ACA snoRNA binding;pseudouridine synthase activity;RNA binding;telomerase activity;telomerase RNA binding	box H/ACA scaRNP complex;box H/ACA snoRNP complex;box H/ACA telomerase RNP complex;cytoplasm;fibrillar center;nucleolus;nucleoplasm;nucleus;telomerase holoenzyme complex	Ribosome biogenesis in eukaryotes			18	18	18	40.1	40.1	40.1	57.673	0	71.446	1115300000	97	1.6707	1	1.31801	3.67244	sp|O60832|DKC1_HUMAN;tr|C9IYT0|C9IYT0_HUMAN;tr|H7C0M1|H7C0M1_HUMAN;tr|H7C2Q9|H7C2Q9_HUMAN;tr|H7BZF2|H7BZF2_HUMAN;tr|H7C2Q2|H7C2Q2_HUMAN	sp|O60832|DKC1_HUMAN;tr|C9IYT0|C9IYT0_HUMAN;tr|H7C0M1|H7C0M1_HUMAN	529	O60832	DKC1_HUMAN	H/ACA ribonucleoprotein complex subunit 4		DKC1
22.0739	22.2869	21.0795	19.5811	20.2403	21.6662				mitochondrial electron transport, NADH to ubiquinone;mitochondrial respiratory chain complex I assembly;mitochondrial translation	NADH dehydrogenase (ubiquinone) activity;structural constituent of ribosome	mitochondrial inner membrane;mitochondrial respiratory chain complex I;mitochondrial ribosome;mitochondrion	Alzheimer disease;Huntington disease;Metabolic pathways;Non-alcoholic fatty liver disease (NAFLD);Oxidative phosphorylation;Parkinson disease;Retrograde endocannabinoid signaling;Thermogenesis			6	6	6	51.3	51.3	51.3	12.551	0	38.134	337370000	22	0.851263	1	1.31761	1.83235	sp|O95182|NDUA7_HUMAN;tr|M0R0N0|M0R0N0_HUMAN;tr|M0R1K9|M0R1K9_HUMAN	sp|O95182|NDUA7_HUMAN;tr|M0R0N0|M0R0N0_HUMAN	719	O95182	NDUA7_HUMAN	NADH dehydrogenase [ubiquinone] 1 alpha subcomplex subunit 7		NDUFA7
16.1868	16.3452	16.5014	15.0869	15.6651	14.3364				benzylpenicillin metabolic process;canalicular bile acid transport;cellular chloride ion homeostasis;cellular response to dexamethasone stimulus;cellular response to hormone stimulus;cellular response to interleukin-1;cellular response to interleukin-6;cellular response to lipopolysaccharide;cellular response to tumor necrosis factor;drug transmembrane transport;female pregnancy;mercury ion trans…	ATP binding;ATPase activity, coupled to transmembrane movement of substances;ATPase-coupled anion transmembrane transporter activity;bilirubin transmembrane transporter activity;organic anion transmembrane transporter activity;protein domain specific binding	apical plasma membrane;brush border membrane;cell surface;integral component of plasma membrane;intercellular canaliculus;plasma membrane	ABC transporters;Antifolate resistance;Bile secretion;Platinum drug resistance			20	20	19	16.6	16.6	16	174.21	0	66.435	573140000	67	1.53489	1	1.31495	3.32721	sp|Q92887|MRP2_HUMAN	sp|Q92887|MRP2_HUMAN	3730	Q92887	MRP2_HUMAN	Canalicular multispecific organic anion transporter 1		ABCC2
18.711	16.6143	17.815	17.888	13.7856	17.5373				apoptotic process;negative regulation of cell proliferation;negative regulation of G1/S transition of mitotic cell cycle;negative regulation of intracellular estrogen receptor signaling pathway;negative regulation of programmed cell death;negative regulation of transcription from RNA polymerase II promoter;negative regulation of vitamin D receptor signaling pathway;transcription, DNA-templated		cytoplasm;mitochondrion				10	10	10	15.7	15.7	15.7	91.173	0	36.117	131540000	22	0.380425	1	1.30978	0.905393	sp|Q63ZY3|KANK2_HUMAN;tr|K7ERU2|K7ERU2_HUMAN;tr|K7EL48|K7EL48_HUMAN;tr|K7ES05|K7ES05_HUMAN;tr|K7EIU4|K7EIU4_HUMAN	sp|Q63ZY3|KANK2_HUMAN	2920	Q63ZY3	KANK2_HUMAN	KN motif and ankyrin repeat domain-containing protein 2		KANK2
22.221	23.4754	23.7743	19.0577	23.0976	23.3917				mitochondrial translational elongation;mitochondrial translational termination;translation	structural constituent of ribosome	mitochondrial inner membrane;mitochondrial oxoglutarate dehydrogenase complex;mitochondrial small ribosomal subunit;mitochondrion				3	3	3	44.7	44.7	44.7	11.466	0	32.871	334860000	18	0.370712	1	1.30796	0.885561	sp|P82909|RT36_HUMAN;tr|D6R941|D6R941_HUMAN	sp|P82909|RT36_HUMAN	2079	P82909	RT36_HUMAN	28S ribosomal protein S36, mitochondrial	36mt;RP-S36	MRPS36
16.0775	1	16.2276	15.3274	13.0541	1				signal transduction	GTPase activator activity					9	6	6	12.4	10	10	116.84	0	16.833	36832000	9	0.0678503	1	1.30785	0.194366	tr|G5EA48|G5EA48_HUMAN;sp|Q7Z6B7|SRGP1_HUMAN;tr|A0A075B7C8|A0A075B7C8_HUMAN	tr|G5EA48|G5EA48_HUMAN;sp|Q7Z6B7|SRGP1_HUMAN	3181	G5EA48	G5EA48_HUMAN
20.5264	19.6031	20.2069	18.8557	18.6594	18.9001				chromatin organization;growth;hormone metabolic process;intracellular estrogen receptor signaling pathway;positive regulation of transcription from RNA polymerase II promoter;regulation of mRNA processing;regulation of transcription from RNA polymerase II promoter;transcription, DNA-templated	chromatin binding;core promoter binding;double-stranded DNA binding;RNA binding;sequence-specific DNA binding	nucleoplasm;nucleus				8	8	8	13.6	13.6	13.6	102.64	0	74.846	293220000	32	2.01737	1	1.30708	4.65744	sp|Q15424|SAFB1_HUMAN;sp|Q14151|SAFB2_HUMAN;tr|K7ES42|K7ES42_HUMAN	sp|Q15424|SAFB1_HUMAN;sp|Q14151|SAFB2_HUMAN	2600	Q15424	SAFB1_HUMAN	Scaffold attachment factor B1	AF-B;AF-B1	SAFB
19.6568	18.0928	17.6492	17.5471	16.9459	16.9959				choline catabolic process;choline transport;phosphatidylcholine biosynthetic process;transmembrane transport	choline transmembrane transporter activity	extracellular exosome;integral component of membrane;membrane;mitochondrial outer membrane;mitochondrion;nucleoplasm;plasma membrane	Choline metabolism in cancer			3	3	3	6.5	6.5	6.5	73.301	0	10.869	63433000	5	0.955297	1	1.30331	2.04081	sp|Q8WWI5|CTL1_HUMAN	sp|Q8WWI5|CTL1_HUMAN	3635	Q8WWI5	CTL1_HUMAN	Choline transporter-like protein 1		SLC44A1
20.8487	19.0968	17.9195	20.9291	18.241	14.807				autophagosome assembly;autophagy;autophagy of mitochondrion;autophagy of nucleus;C-terminal protein lipidation;macroautophagy;positive regulation of protein catabolic process;protein delipidation;protein targeting to membrane;proteolysis	cysteine-type endopeptidase activity;cysteine-type peptidase activity;endopeptidase activity	cytoplasm;cytosol	Autophagy - animal;Autophagy - other			6	6	6	21.1	21.1	21.1	44.294	0	23.133	140570000	17	0.263048	1	1.29592	0.659351	sp|Q9Y4P1|ATG4B_HUMAN;tr|C9JIK8|C9JIK8_HUMAN;tr|H7C2A6|H7C2A6_HUMAN;tr|C9JQ72|C9JQ72_HUMAN;tr|F2Z2K8|F2Z2K8_HUMAN;tr|C9J3C0|C9J3C0_HUMAN;tr|H0Y2Y0|H0Y2Y0_HUMAN;tr|C9JVD5|C9JVD5_HUMAN	sp|Q9Y4P1|ATG4B_HUMAN;tr|C9JIK8|C9JIK8_HUMAN;tr|H7C2A6|H7C2A6_HUMAN;tr|C9JQ72|C9JQ72_HUMAN	5330	Q9Y4P1	ATG4B_HUMAN	Cysteine protease ATG4B		ATG4B
17.3995	14.4309	16.577	15.6823	16.0132	12.8273				microtubule cytoskeleton organization;mitotic cytokinesis;mRNA processing;negative regulation of apoptotic process;regulation of cell cycle;regulation of mRNA splicing, via spliceosome;regulation of RNA splicing;RNA splicing	DNA binding;RNA binding;RS domain binding	nuclear speck				15	15	15	8.7	8.7	8.7	263.83	0	42.291	235860000	35	0.409145	1	1.29491	0.963605	sp|P18583|SON_HUMAN;tr|J3QSZ5|J3QSZ5_HUMAN;tr|H7C1M2|H7C1M2_HUMAN	sp|P18583|SON_HUMAN	1179	P18583	SON_HUMAN	Protein SON		SON
20.3847	1	18.9266	17.674	1	17.7542				Golgi apparatus mannose trimming;N-glycan processing;protein glycosylation	calcium ion binding;mannosidase activity;mannosyl-oligosaccharide 1,2-alpha-mannosidase activity	cytosol;endoplasmic reticulum;endoplasmic reticulum-Golgi intermediate compartment;extracellular exosome;Golgi apparatus;Golgi membrane;integral component of membrane;membrane	Metabolic pathways;N-Glycan biosynthesis;Protein processing in endoplasmic reticulum			8	8	8	20.7	20.7	20.7	72.968	0	69.988	87605000	14	0.0533246	1	1.29436	0.154829	sp|P33908|MA1A1_HUMAN	sp|P33908|MA1A1_HUMAN	1435	P33908	MA1A1_HUMAN	Mannosyl-oligosaccharide 1,2-alpha-mannosidase IA		MAN1A1
24.9542	22.3728	25.4447	23.2383	21.42	24.2313				chromatin silencing	DNA binding;protein heterodimerization activity	extracellular exosome;nuclear chromatin;nucleosome;nucleus	Alcoholism;Necroptosis;Systemic lupus erythematosus			6	4	4	53.9	46.9	46.9	13.509	0	243.79	1224200000	62	0.441092	1	1.29401	1.02772	sp|Q71UI9|H2AV_HUMAN;sp|P0C0S5|H2AZ_HUMAN;tr|C9J0D1|C9J0D1_HUMAN;tr|C9J386|C9J386_HUMAN	sp|Q71UI9|H2AV_HUMAN;sp|P0C0S5|H2AZ_HUMAN;tr|C9J0D1|C9J0D1_HUMAN;tr|C9J386|C9J386_HUMAN	1005	Q71UI9	H2AV_HUMAN	Histone H2A.V		H2AFV
21.6105	19.0672	20.4996	18.3215	18.7219	20.2778				quinone metabolic process	NADP binding;NADPH:quinone reductase activity	cytosol				7	7	7	26.1	26.1	26.1	38.696	0	36.372	246600000	19	0.608264	1	1.28539	1.35649	sp|O95825|QORL1_HUMAN;tr|A6NMA8|A6NMA8_HUMAN;tr|A6NND8|A6NND8_HUMAN;tr|A6NHJ8|A6NHJ8_HUMAN;tr|C9JAL0|C9JAL0_HUMAN;tr|C9JQD0|C9JQD0_HUMAN;tr|A0A0C4DG14|A0A0C4DG14_HUMAN;tr|C9K0F7|C9K0F7_HUMAN;tr|F8WF64|F8WF64_HUMAN;tr|C9JZK8|C9JZK8_HUMAN;tr|H7C3I5|H7C3I5_HUMAN;tr|H7C3S0|H7C3S0_HUMAN;tr|H7C0X3|H7C0X3_HUMAN	sp|O95825|QORL1_HUMAN;tr|A6NMA8|A6NMA8_HUMAN;tr|A6NND8|A6NND8_HUMAN;tr|A6NHJ8|A6NHJ8_HUMAN;tr|C9JAL0|C9JAL0_HUMAN	798	O95825	QORL1_HUMAN	Quinone oxidoreductase-like protein 1		CRYZL1
16.4321	1	19.1754	1	14.8062	16.9459				lipid metabolic process;proteolysis;regulation of lipid metabolic process	identical protein binding;peptidase activity	cytosol;mitochondrion				7	7	7	20.3	20.3	20.3	60.693	0	18.388	265280000	14	0.058951	1	1.28512	0.170261	sp|P83111|LACTB_HUMAN	sp|P83111|LACTB_HUMAN	2088	P83111	LACTB_HUMAN	Serine beta-lactamase-like protein LACTB, mitochondrial {ECO:0000305}		LACTB
17.8436	17.4332	19.2071	15.8491	15.9678	18.8117				bile acid biosynthetic process;fatty acid alpha-oxidation;fatty acid beta-oxidation;long-chain fatty acid import;long-chain fatty acid metabolic process;methyl-branched fatty acid metabolic process;neutrophil degranulation;very long-chain fatty acid catabolic process	ATP binding;decanoate--CoA ligase activity;enzyme binding;fatty acid transmembrane transporter activity;long-chain fatty acid-CoA ligase activity;phytanate-CoA ligase activity;pristanate-CoA ligase activity;receptor binding;very long-chain fatty acid-CoA ligase activity	endoplasmic reticulum lumen;endoplasmic reticulum membrane;extracellular exosome;integral component of endoplasmic reticulum membrane;integral component of peroxisomal membrane;mitochondrion;peroxisomal membrane;plasma membrane;specific granule membrane	Insulin resistance;Peroxisome;PPAR signaling pathway			3	3	3	6.3	6.3	6.3	70.311	0	7.82	62094000	4	0.508339	1	1.28505	1.16098	sp|O14975|S27A2_HUMAN;tr|G3V1R7|G3V1R7_HUMAN	sp|O14975|S27A2_HUMAN;tr|G3V1R7|G3V1R7_HUMAN	318	O14975	S27A2_HUMAN	Very long-chain acyl-CoA synthetase	LACS;LCS	SLC27A2
18.3367	16.3344	19.2841	17.343	15.5388	17.2232				cerebellar Purkinje cell layer development;glycosaminoglycan catabolic process;inner ear receptor cell development;locomotor rhythm;lysosome organization;middle ear morphogenesis;nervous system development;retinal rod cell development	alpha-N-acetylglucosaminidase activity	extracellular exosome;lysosomal lumen;lysosome	Glycosaminoglycan degradation;Lysosome;Metabolic pathways			8	8	8	18.7	18.7	18.7	82.265	0	17.687	60022000	10	0.541646	1	1.28344	1.22638	sp|P54802|ANAG_HUMAN;tr|K7ENX5|K7ENX5_HUMAN	sp|P54802|ANAG_HUMAN	1826	P54802	ANAG_HUMAN	Alpha-N-acetylglucosaminidase		NAGLU
22.7795	22.5755	23.225	21.4935	21.3177	21.9236				mRNA splicing, via spliceosome;regulation of alternative mRNA splicing, via spliceosome;RNA metabolic process;RNA processing	pre-mRNA intronic binding;RNA binding;transcription regulatory region DNA binding	cytoplasm;extracellular exosome;intracellular ribonucleoprotein complex;membrane;nucleoplasm;nucleus;ribonucleoprotein granule				16	16	8	41.6	41.6	24.4	64.132	0	150.46	944940000	65	2.08619	1	1.28176	4.87334	sp|P14866|HNRPL_HUMAN;tr|M0QXS5|M0QXS5_HUMAN;tr|M0R1W6|M0R1W6_HUMAN;tr|M0R076|M0R076_HUMAN;tr|M0QYL7|M0QYL7_HUMAN;tr|B4DVF8|B4DVF8_HUMAN	sp|P14866|HNRPL_HUMAN;tr|M0QXS5|M0QXS5_HUMAN	1109	P14866	HNRPL_HUMAN	Heterogeneous nuclear ribonucleoprotein L	nRNP L	HNRNPL
22.4961	20.4069	21.3946	20.0781	19.8091	20.5772				dephosphorylation;phosphate-containing compound metabolic process;protein dephosphorylation;purine ribonucleoside monophosphate biosynthetic process	inorganic diphosphatase activity;magnesium ion binding;phosphatase activity;protein histidine phosphatase activity;protein homodimerization activity	cytosol;nuclear speck;nucleus	Oxidative phosphorylation			8	8	8	41.5	41.5	41.5	29.165	0	36.511	243890000	20	0.927172	1	1.27772	1.98401	sp|Q9H008|LHPP_HUMAN;tr|Q5T1Z0|Q5T1Z0_HUMAN	sp|Q9H008|LHPP_HUMAN;tr|Q5T1Z0|Q5T1Z0_HUMAN	4374	Q9H008	LHPP_HUMAN	Phospholysine phosphohistidine inorganic pyrophosphate phosphatase	LHPP	LHPP
17.1615	16.1698	17.667	16.2435	14.2832	16.6471				blastocyst growth;cell cycle arrest;cell proliferation;DNA damage checkpoint;DNA damage response, signal transduction by p53 class mediator;DNA double-strand break processing;DNA duplex unwinding;DNA replication;DNA synthesis involved in DNA repair;double-strand break repair;double-strand break repair via homologous recombination;double-strand break repair via nonhomologous end joining;intrinsic …	damaged DNA binding;protein N-terminus binding;transcription factor binding	cytosol;Mre11 complex;nuclear chromosome, telomeric region;nuclear inclusion body;nucleolus;nucleoplasm;nucleus;PML body;replication fork;site of double-strand break	Cellular senescence;Homologous recombination			4	4	4	9.2	9.2	9.2	84.958	0	8.9052	35284000	4	0.679801	1	1.27483	1.49584	sp|O60934|NBN_HUMAN;tr|A0A0C4DG07|A0A0C4DG07_HUMAN;tr|E2QRP0|E2QRP0_HUMAN;tr|E5RGU1|E5RGU1_HUMAN	sp|O60934|NBN_HUMAN;tr|A0A0C4DG07|A0A0C4DG07_HUMAN	538	O60934	NBN_HUMAN	Nibrin		NBN
22.9528	20.3761	20.9556	20.3768	19.9788	20.1158				autophagosome maturation;cellular response to starvation;chaperone-mediated autophagy;lysosomal protein catabolic process;muscle cell cellular homeostasis;negative regulation of protein homooligomerization;neutrophil degranulation;platelet degranulation;protein import;protein stabilization;protein targeting;protein targeting to lysosome involved in chaperone-mediated autophagy;regulation of prote…	enzyme binding;protein domain specific binding	autolysosome;azurophil granule membrane;chaperone-mediated autophagy translocation complex;extracellular exosome;extracellular space;ficolin-1-rich granule membrane;integral component of autophagosome membrane;late endosome;late endosome membrane;lysosomal lumen;lysosomal membrane;lysosome;membrane;perinuclear region of cytoplasm;phagocytic vesicle membrane;plasma membrane;platelet dense granule …	Autophagy - animal;Lysosome;Phagosome;Tuberculosis			3	3	2	7.1	7.1	4.9	44.96	0	20.382	365200000	16	0.738654	1	1.27106	1.6107	sp|P13473|LAMP2_HUMAN	sp|P13473|LAMP2_HUMAN	1078	P13473	LAMP2_HUMAN	Lysosome-associated membrane glycoprotein 2	AMP-2;ysosome-associated membrane protein 2	LAMP2
17.9419	15.4386	16.6711	16.1893	14.7035	15.35				covalent chromatin modification;regulation of transcription, DNA-templated;transcription, DNA-templated	lysine-acetylated histone binding;nucleic acid binding					12	12	12	36	36	36	66.999	0	64.069	309230000	23	0.686872	1	1.26955	1.50962	sp|Q9H8M2|BRD9_HUMAN;tr|H0YBR9|H0YBR9_HUMAN;tr|H0YAW8|H0YAW8_HUMAN;tr|H0YBF1|H0YBF1_HUMAN;tr|C9JBY0|C9JBY0_HUMAN	sp|Q9H8M2|BRD9_HUMAN	4521	Q9H8M2	BRD9_HUMAN	Bromodomain-containing protein 9		BRD9
20.9459	18.3368	20.0603	19.5445	16.7272	19.2707				cellular protein metabolic process;nucleus organization;post-translational protein modification;regulation of lipid metabolic process		endoplasmic reticulum lumen;extracellular exosome;extracellular space;Golgi apparatus;integral component of plasma membrane				11	11	11	27.2	27.2	27.2	45.333	0	45.097	521520000	40	0.464344	1	1.26685	1.07402	sp|Q8NBJ4|GOLM1_HUMAN;tr|F8WAT9|F8WAT9_HUMAN;tr|C9JYM4|C9JYM4_HUMAN;tr|C9J941|C9J941_HUMAN	sp|Q8NBJ4|GOLM1_HUMAN	3453	Q8NBJ4	GOLM1_HUMAN	Golgi membrane protein 1		GOLM1
20.1378	16.5675	18.3832	17.6503	16.3492	17.2932				exocyst localization;exocytosis;protein transport	cadherin binding;SNARE binding	cytosol;exocyst;Golgi apparatus;growth cone;midbody;perinuclear region of cytoplasm;secretory granule membrane				18	18	18	28.4	28.4	28.4	86.844	0	75.318	751260000	95	0.502177	1	1.2653	1.14884	sp|O60645|EXOC3_HUMAN;tr|D6RB59|D6RB59_HUMAN;tr|H0Y995|H0Y995_HUMAN;tr|D6RBR9|D6RBR9_HUMAN	sp|O60645|EXOC3_HUMAN;tr|D6RB59|D6RB59_HUMAN	512	O60645	EXOC3_HUMAN	Exocyst complex component 3		EXOC3
21.3661	19.4317	18.5559	19.8244	16.8742	18.8632										8	8	8	25.8	25.8	25.8	53.458	0	41.556	163110000	21	0.453214	1	1.26396	1.05189	tr|J3KND1|J3KND1_HUMAN;sp|Q96ER3|SAAL1_HUMAN;tr|E9PRZ1|E9PRZ1_HUMAN;tr|E9PMD2|E9PMD2_HUMAN;tr|H0YDM3|H0YDM3_HUMAN;tr|H0YEK5|H0YEK5_HUMAN;tr|H0YCN7|H0YCN7_HUMAN;tr|E9PL53|E9PL53_HUMAN	tr|J3KND1|J3KND1_HUMAN;sp|Q96ER3|SAAL1_HUMAN;tr|E9PRZ1|E9PRZ1_HUMAN;tr|E9PMD2|E9PMD2_HUMAN	3861	J3KND1	J3KND1_HUMAN
22.6321	20.0862	20.6574	19.4219	19.4338	20.7341				protein import into mitochondrial matrix;protein targeting to mitochondrion	P-P-bond-hydrolysis-driven protein transmembrane transporter activity	integral component of mitochondrial inner membrane;mitochondrial inner membrane;mitochondrial inner membrane presequence translocase complex;mitochondrion;nucleoplasm				3	3	3	32.2	32.2	32.2	18.023	0	46.521	87492000	12	0.64333	1	1.26193	1.4248	sp|Q99595|TI17A_HUMAN	sp|Q99595|TI17A_HUMAN	4085	Q99595	TI17A_HUMAN	Mitochondrial import inner membrane translocase subunit Tim17-A		TIMM17A
22.0787	18.2345	22.3455	22.2918	14.4261	22.1562				cellular copper ion homeostasis;copper ion transport;generation of precursor metabolites and energy;mitochondrial respiratory chain complex IV assembly;negative regulation of proteasomal protein catabolic process;respiratory chain complex IV assembly	copper ion binding	host cell mitochondrial intermembrane space;mitochondrial inner membrane;mitochondrion;myofibril				6	6	6	25.9	25.9	25.9	33.814	0	75.154	391230000	23	0.162462	1	1.26148	0.432132	sp|O75880|SCO1_HUMAN;tr|J3QL56|J3QL56_HUMAN	sp|O75880|SCO1_HUMAN;tr|J3QL56|J3QL56_HUMAN	643	O75880	SCO1_HUMAN	Protein SCO1 homolog, mitochondrial		SCO1
17.7755	17.3364	16.474	17.437	15.6418	14.7243				calcium ion transport into cytosol;G-protein coupled receptor signaling pathway;long-term synaptic potentiation;memory;platelet activation;positive regulation of cytosolic calcium ion concentration;protein heterooligomerization;protein homooligomerization;regulation of cardiac conduction;regulation of insulin secretion;response to calcium ion;sensory perception of bitter taste;sensory perception …	calcium ion binding;calcium-release channel activity;inositol 1,3,4,5 tetrakisphosphate binding;inositol 1,4,5 trisphosphate binding;inositol 1,4,5-trisphosphate-sensitive calcium-release channel activity;inositol hexakisphosphate binding;phosphatidylinositol binding	apical part of cell;brush border;cytoplasm;endoplasmic reticulum;endoplasmic reticulum membrane;integral component of plasma membrane;membrane;myelin sheath;neuronal cell body;nuclear outer membrane;nucleolus;nucleoplasm;plasma membrane;platelet dense tubular network membrane;receptor complex	Aldosterone synthesis and secretion;Alzheimer disease;Apelin signaling pathway;Apoptosis;Calcium signaling pathway;Cellular senescence;cGMP-PKG signaling pathway;Cholinergic synapse;Circadian entrainment;Cortisol synthesis and secretion;C-type lectin receptor signaling pathway;Cushing syndrome;Dopaminergic synapse;Estrogen signaling pathway;Gap junction;Gastric acid secretion;Glucagon signaling p…			10	10	10	5.7	5.7	5.7	304.1	0	26.016	141340000	20	0.644487	1	1.26093	1.42705	sp|Q14573|ITPR3_HUMAN	sp|Q14573|ITPR3_HUMAN	2483	Q14573	ITPR3_HUMAN	Inositol 1,4,5-trisphosphate receptor type 3		ITPR3
19.3276	16.0301	17.0955	17.3667	14.1924	17.1136				endocytosis;intracellular protein transport		AP-1 adaptor complex;cytoplasm;Golgi apparatus				6	6	6	7.8	7.8	7.8	140.65	0	13.811	118570000	17	0.375437	1	1.26011	0.895219	sp|Q9UMZ2|SYNRG_HUMAN;tr|A0A087WZS7|A0A087WZS7_HUMAN	sp|Q9UMZ2|SYNRG_HUMAN	5145	Q9UMZ2	SYNRG_HUMAN	Synergin gamma		SYNRG
22.1416	21.4298	22.251	21.964	18.3032	21.777						integral component of membrane;mitochondrion;nucleoplasm				3	3	3	18.1	18.1	18.1	20.038	0	8.2471	223320000	17	0.444321	1	1.25943	1.03416	tr|E7EWP0|E7EWP0_HUMAN;sp|O43674|NDUB5_HUMAN;tr|H0Y886|H0Y886_HUMAN	tr|E7EWP0|E7EWP0_HUMAN;sp|O43674|NDUB5_HUMAN;tr|H0Y886|H0Y886_HUMAN	441	E7EWP0	E7EWP0_HUMAN			NDUFB5
19.04	18.6649	17.3111	16.8653	16.6461	17.7414				neutrophil degranulation;signal transduction	cytokine activity;growth factor activity;RNA binding	azurophil granule lumen;endoplasmic reticulum;endosome;extracellular exosome;extracellular region;lysosome				4	4	4	8.3	8.3	8.3	63.544	0	8.2593	47252000	5	0.942382	1	1.2544	2.01469	sp|P28799|GRN_HUMAN;tr|K7EKL3|K7EKL3_HUMAN;tr|K7EQ05|K7EQ05_HUMAN;tr|K7EMR1|K7EMR1_HUMAN	sp|P28799|GRN_HUMAN;tr|K7EKL3|K7EKL3_HUMAN;tr|K7EQ05|K7EQ05_HUMAN	1347	P28799	GRN_HUMAN	Granulins		GRN
21.5334	18.9835	17.4695	18.4874	18.2079	17.528				endocytic recycling;endosome organization;Golgi ribbon formation;Golgi vesicle transport;intracellular protein transport;regulation of cellular protein localization;regulation of protein localization;retrograde transport, endosome to Golgi;vesicle docking;vesicle fusion	SNAP receptor activity;syntaxin binding	clathrin-coated vesicle;cytosol;early endosome;Golgi apparatus;Golgi membrane;integral component of membrane;integral component of synaptic vesicle membrane;nucleoplasm;perinuclear region of cytoplasm;phagocytic vesicle;plasma membrane;SNARE complex;terminal bouton;trans-Golgi network;trans-Golgi network membrane	SNARE interactions in vesicular transport			4	4	4	32.2	32.2	32.2	29.176	0	29.2	83036000	11	0.441519	1	1.25436	1.02857	sp|O43752|STX6_HUMAN	sp|O43752|STX6_HUMAN	450	O43752	STX6_HUMAN	Syntaxin-6		STX6
21.1503	18.1142	16.521	17.8857	17.5911	16.5542				cellular response to tumor necrosis factor;ceramide biosynthetic process;glycerophospholipid catabolic process;glycosphingolipid metabolic process;sphingomyelin catabolic process	metal ion binding;sphingomyelin phosphodiesterase activity;sphingomyelin phosphodiesterase D activity	endoplasmic reticulum;endoplasmic reticulum membrane;Golgi apparatus;Golgi membrane;integral component of membrane;trans-Golgi network	Metabolic pathways;Sphingolipid metabolism			7	7	7	8.8	8.8	8.8	93.351	0	9.8276	190650000	10	0.369702	1	1.25155	0.883495	sp|Q9NXE4|NSMA3_HUMAN;tr|H7C1Q6|H7C1Q6_HUMAN;tr|H7BXF4|H7BXF4_HUMAN;tr|B1PBA3|B1PBA3_HUMAN;tr|H7C0W5|H7C0W5_HUMAN;tr|H7C235|H7C235_HUMAN;tr|H7C2J2|H7C2J2_HUMAN;tr|F8WF03|F8WF03_HUMAN;tr|F2Z2I0|F2Z2I0_HUMAN;tr|F2Z2W5|F2Z2W5_HUMAN;tr|C9J647|C9J647_HUMAN;tr|H7C2E2|H7C2E2_HUMAN	sp|Q9NXE4|NSMA3_HUMAN;tr|H7C1Q6|H7C1Q6_HUMAN;tr|H7BXF4|H7BXF4_HUMAN;tr|B1PBA3|B1PBA3_HUMAN;tr|H7C0W5|H7C0W5_HUMAN;tr|H7C235|H7C235_HUMAN	4823	Q9NXE4	NSMA3_HUMAN	Sphingomyelin phosphodiesterase 4		SMPD4
25.8436	24.4687	24.5576	23.9852	23.4509	23.6845				antigen processing and presentation of exogenous peptide antigen via MHC class II;autophagy;collagen catabolic process;neutrophil degranulation;protein catabolic process;proteolysis	aspartic-type endopeptidase activity;cysteine-type endopeptidase activity;serine-type endopeptidase activity	extracellular exosome;extracellular region;extracellular space;ficolin-1-rich granule lumen;lysosomal lumen;lysosome;melanosome;membrane raft;specific granule lumen;tertiary granule lumen	Apoptosis;Autophagy - animal;Estrogen signaling pathway;Lysosome;Sphingolipid signaling pathway;Tuberculosis			17	17	17	47.1	47.1	47.1	44.552	0	307.63	3895800000	154	1.24739	1	1.24977	2.65689	sp|P07339|CATD_HUMAN;tr|C9JH19|C9JH19_HUMAN;tr|H7C469|H7C469_HUMAN;tr|H7C1V0|H7C1V0_HUMAN;tr|F8WD96|F8WD96_HUMAN;tr|F8W787|F8W787_HUMAN	sp|P07339|CATD_HUMAN;tr|C9JH19|C9JH19_HUMAN;tr|H7C469|H7C469_HUMAN	934	P07339	CATD_HUMAN	Cathepsin D		CTSD
14.9728	16.4286	16.3145	11.8076	15.2168	16.9424				histone acetylation	kinase activity	Golgi apparatus;histone acetyltransferase complex;nucleoplasm				47	47	0	16.2	16.2	0	436.13	0	175.23	676920000	100	0.325081	1	1.24969	0.791269	tr|F2Z2U4|F2Z2U4_HUMAN	tr|F2Z2U4|F2Z2U4_HUMAN	5526	F2Z2U4	F2Z2U4_HUMAN			TRRAP
25.1782	25.158	24.7143	24.2187	23.3265	23.7618				cellular protein localization;cellular response to hypoxia;establishment or maintenance of microtubule cytoskeleton polarity;IRE1-mediated unfolded protein response;mitotic nuclear envelope disassembly;mitotic nuclear envelope reassembly;muscle organ development;negative regulation of cardiac muscle hypertrophy in response to stress;negative regulation of cell proliferation;negative regulation of…	identical protein binding;structural molecule activity	cytosol;extracellular matrix;intermediate filament;lamin filament;nuclear envelope;nuclear lamina;nuclear membrane;nuclear speck;nucleoplasm;nucleus;perinuclear region of cytoplasm	Apoptosis;Arrhythmogenic right ventricular cardiomyopathy (ARVC);Dilated cardiomyopathy (DCM);Hypertrophic cardiomyopathy (HCM)			41	41	40	58.6	58.6	58.6	74.139	0	323.31	9549300000	366	1.8553	1	1.24783	4.17681	sp|P02545|LMNA_HUMAN;tr|Q3BDU5|Q3BDU5_HUMAN;tr|Q5TCI8|Q5TCI8_HUMAN;tr|H0YAB0|H0YAB0_HUMAN;tr|A0A0C4DGC5|A0A0C4DGC5_HUMAN	sp|P02545|LMNA_HUMAN;tr|Q3BDU5|Q3BDU5_HUMAN;tr|Q5TCI8|Q5TCI8_HUMAN	849	P02545	LMNA_HUMAN	Prelamin-A/C		LMNA
21.288	20.2113	21.0256	20.6147	18.4225	19.7529				protein N-linked glycosylation via arginine		integral component of membrane;oligosaccharyltransferase complex				1	1	1	12.5	12.5	12.5	14.678	0.00042194	4.5975	95549000	14	0.804813	1	1.24499	1.74052	sp|Q8N6L1|KTAP2_HUMAN	sp|Q8N6L1|KTAP2_HUMAN	3425	Q8N6L1	KTAP2_HUMAN	Keratinocyte-associated protein 2	CP-2	KRTCAP2
21.6777	17.5671	19.9231	20.4829	15.7069	19.2493				chaperone-mediated protein folding;protein folding	calcium ion binding;FK506 binding;peptidyl-prolyl cis-trans isomerase activity	cytoplasm;endoplasmic reticulum				8	8	8	16.3	16.3	16.3	63.083	0	29.144	225980000	17	0.266827	1	1.24295	0.667533	sp|O95302|FKBP9_HUMAN;tr|C9J4P8|C9J4P8_HUMAN;sp|Q75LS8|FKB9L_HUMAN	sp|O95302|FKBP9_HUMAN	740	O95302	FKBP9_HUMAN	Peptidyl-prolyl cis-trans isomerase FKBP9	PIase FKBP9	FKBP9
22.7797	21.2906	22.6421	21.5803	20.3956	21.0378				platelet aggregation	RNA binding;zinc ion binding	extracellular exosome;focal adhesion;nucleus				4	4	4	29.5	29.5	29.5	20.567	0	18.944	512230000	28	0.986992	1	1.23288	2.10525	sp|P21291|CSRP1_HUMAN;tr|E9PND2|E9PND2_HUMAN;tr|E9PP21|E9PP21_HUMAN;tr|E9PS42|E9PS42_HUMAN	sp|P21291|CSRP1_HUMAN;tr|E9PND2|E9PND2_HUMAN;tr|E9PP21|E9PP21_HUMAN;tr|E9PS42|E9PS42_HUMAN	1223	P21291	CSRP1_HUMAN	Cysteine and glycine-rich protein 1		CSRP1
21.5523	21.1391	18.6293	18.5794	20.99	18.0659				positive regulation of ubiquitin-protein transferase activity;post-translational protein modification;protein neddylation	cullin family protein binding;ubiquitin conjugating enzyme binding;ubiquitin-like protein binding	cytosol;nucleus;ubiquitin ligase complex				6	6	6	27.8	27.8	27.8	30.124	0	106.15	184640000	23	0.406042	1	1.22845	0.957344	sp|Q96GG9|DCNL1_HUMAN;tr|C9JVE2|C9JVE2_HUMAN;tr|C9J8R4|C9J8R4_HUMAN;tr|C9JRU6|C9JRU6_HUMAN;tr|C9J0B2|C9J0B2_HUMAN;tr|C9JUW4|C9JUW4_HUMAN;tr|F8WC32|F8WC32_HUMAN	sp|Q96GG9|DCNL1_HUMAN;tr|C9JVE2|C9JVE2_HUMAN;tr|C9J8R4|C9J8R4_HUMAN;tr|C9JRU6|C9JRU6_HUMAN;tr|C9J0B2|C9J0B2_HUMAN;tr|C9JUW4|C9JUW4_HUMAN	3897	Q96GG9	DCNL1_HUMAN	DCN1-like protein 1		DCUN1D1
23.0051	22.3344	22.0287	21.3083	20.8612	21.5274				ATP transport;cellular response to calcium ion;cellular response to oxidative stress;mitochondrial transport;regulation of cell death	ADP transmembrane transporter activity;ATP transmembrane transporter activity;calcium ion binding	integral component of membrane;mitochondrial inner membrane;mitochondrion				21	21	21	51.8	51.8	51.8	53.354	0	90.651	1027500000	82	1.60775	1	1.22377	3.50989	sp|Q6NUK1|SCMC1_HUMAN;tr|J3KN42|J3KN42_HUMAN;tr|H3BMI3|H3BMI3_HUMAN	sp|Q6NUK1|SCMC1_HUMAN	2977	Q6NUK1	SCMC1_HUMAN	Calcium-binding mitochondrial carrier protein SCaMC-1		SLC25A24
21.5977	18.9987	1	19.4148	17.5231	1				mRNA splicing, via spliceosome;positive regulation of androgen receptor activity;regulation of transcription from RNA polymerase II promoter	DNA binding transcription factor activity;ligand-dependent nuclear receptor transcription coactivator activity;nuclear hormone receptor binding	nucleoplasm;nucleus;spliceosomal complex	Spliceosome			4	4	4	25.7	25.7	25.7	17	0	17.498	82916000	12	0.0478811	1	1.21952	0.139753	sp|P41223|BUD31_HUMAN;tr|C9JNV2|C9JNV2_HUMAN;tr|F8WCN7|F8WCN7_HUMAN;tr|C9JCD9|C9JCD9_HUMAN	sp|P41223|BUD31_HUMAN;tr|C9JNV2|C9JNV2_HUMAN	1532	P41223	BUD31_HUMAN	Protein BUD31 homolog		BUD31
23.5502	21.7491	22.2084	21.6245	20.4764	21.7494				carbohydrate biosynthetic process;CMP-N-acetylneuraminate biosynthetic process	N-acetylneuraminate synthase activity;N-acylneuraminate cytidylyltransferase activity;N-acylneuraminate-9-phosphate synthase activity	cytoplasm;cytosol;extracellular exosome	Amino sugar and nucleotide sugar metabolism;Metabolic pathways			10	10	10	44.8	44.8	44.8	40.307	0	92.034	703070000	33	0.837575	1	1.2191	1.80522	sp|Q9NR45|SIAS_HUMAN;tr|Q5TBR1|Q5TBR1_HUMAN;tr|Q5TBR0|Q5TBR0_HUMAN	sp|Q9NR45|SIAS_HUMAN	4678	Q9NR45	SIAS_HUMAN	Sialic acid synthase		NANS
24.0018	24.6157	24.2279	24.2162	20.8372	24.1388				generation of precursor metabolites and energy;mitochondrial electron transport, cytochrome c to oxygen	cytochrome-c oxidase activity	integral component of membrane;mitochondrial inner membrane;mitochondrion	Alzheimer disease;Cardiac muscle contraction;Huntington disease;Metabolic pathways;Non-alcoholic fatty liver disease (NAFLD);Oxidative phosphorylation;Parkinson disease;Thermogenesis			3	3	3	29.3	29.3	29.3	8.7813	0	7.5922	1120200000	38	0.467132	1	1.21775	1.07955	sp|P09669|COX6C_HUMAN	sp|P09669|COX6C_HUMAN	998	P09669	COX6C_HUMAN	Cytochrome c oxidase subunit 6C		COX6C
20.6289	17.741	20.1673	18.1631	17.3047	19.4176					GTPase activator activity					3	3	3	19.2	19.2	19.2	20.147	0	7.7246	70255000	3	0.48819	1	1.21725	1.12125	tr|D6RBS5|D6RBS5_HUMAN;sp|Q8IZ81|ELMD2_HUMAN;tr|V9GY58|V9GY58_HUMAN;tr|D6RHX2|D6RHX2_HUMAN	tr|D6RBS5|D6RBS5_HUMAN;sp|Q8IZ81|ELMD2_HUMAN;tr|V9GY58|V9GY58_HUMAN	3352	D6RBS5	D6RBS5_HUMAN			ELMOD2
19.6971	17.1776	20.2725	18.668	16.9449	17.8936						nucleoplasm				3	3	3	20.7	20.7	20.7	22.703	0	8.6975	49106000	9	0.493112	1	1.2136	1.13097	tr|G3V4C6|G3V4C6_HUMAN;sp|Q9Y224|CN166_HUMAN;tr|H0YJB9|H0YJB9_HUMAN;tr|G3V4E7|G3V4E7_HUMAN	tr|G3V4C6|G3V4C6_HUMAN;sp|Q9Y224|CN166_HUMAN;tr|H0YJB9|H0YJB9_HUMAN	5197	G3V4C6	G3V4C6_HUMAN			RTRAF
19.7814	18.8441	19.354	18.644	17.7702	17.9416				signal transduction	GTPase activator activity	cytosol;nucleoplasm				17	17	14	22.1	22.1	19.7	120.74	0	89.73	444230000	54	1.47195	1	1.20792	3.17387	tr|B7ZM87|B7ZM87_HUMAN;tr|A2RUF3|A2RUF3_HUMAN;sp|O75044|SRGP2_HUMAN;tr|A0A075B7B5|A0A075B7B5_HUMAN;sp|P0DMP2|SRG2B_HUMAN;sp|P0DJJ0|SRG2C_HUMAN;tr|Q5VZB4|Q5VZB4_HUMAN;tr|A0A075B743|A0A075B743_HUMAN;tr|A0A075B7E6|A0A075B7E6_HUMAN;tr|E9PDX4|E9PDX4_HUMAN;tr|A0A075B7E9|A0A075B7E9_HUMAN;tr|A0A087WW56|A0A087WW56_HUMAN;tr|A0A087X0L1|A0A087X0L1_HUMAN;tr|A0A087X1G6|A0A087X1G6_HUMAN	tr|B7ZM87|B7ZM87_HUMAN;tr|A2RUF3|A2RUF3_HUMAN;sp|O75044|SRGP2_HUMAN;tr|A0A075B7B5|A0A075B7B5_HUMAN	541	B7ZM87	B7ZM87_HUMAN
18.1564	17.5847	16.9608	16.8848	17.7524	14.4539						bicellular tight junction;nucleus;plasma membrane	Tight junction			14	14	14	20.6	20.6	20.6	101.4	0	41.37	519650000	45	0.503212	1	1.20361	1.15088	sp|O95049|ZO3_HUMAN;tr|K7ESC0|K7ESC0_HUMAN	sp|O95049|ZO3_HUMAN	705	O95049	ZO3_HUMAN	Tight junction protein ZO-3		TJP3
24.0131	21.243	21.0565	21.4531	20.4253	20.8268						integral component of membrane				5	5	5	32.8	32.8	32.8	21.127	0	155.03	454100000	35	0.52842	1	1.20243	1.20045	tr|Q5T8U5|Q5T8U5_HUMAN;sp|O15260|SURF4_HUMAN;tr|B7Z1G8|B7Z1G8_HUMAN	tr|Q5T8U5|Q5T8U5_HUMAN;sp|O15260|SURF4_HUMAN;tr|B7Z1G8|B7Z1G8_HUMAN	354	Q5T8U5	Q5T8U5_HUMAN
21.0409	20.83	20.3557	20.0551	18.8716	19.6977				apoptotic process;cellular response to leukemia inhibitory factor;negative regulation of transcription, DNA-templated;positive regulation of apoptotic process;positive regulation of DNA-templated transcription, initiation;positive regulation of intrinsic apoptotic signaling pathway;positive regulation of response to DNA damage stimulus;regulation of DNA-templated transcription in response to stre…	DNA binding;RNA binding	cytoplasm;nuclear speck;nucleoplasm;nucleus				14	13	13	18.6	17.4	17.4	106.12	0	74.251	561300000	58	1.38405	1	1.20075	2.96618	sp|Q9NYF8|BCLF1_HUMAN;tr|E9PK91|E9PK91_HUMAN;tr|E9PK09|E9PK09_HUMAN;tr|E9PQN2|E9PQN2_HUMAN;tr|E9PKI6|E9PKI6_HUMAN;tr|E9PJA7|E9PJA7_HUMAN;tr|H0YF14|H0YF14_HUMAN;tr|H0YF00|H0YF00_HUMAN;tr|H0YF63|H0YF63_HUMAN	sp|Q9NYF8|BCLF1_HUMAN;tr|E9PK91|E9PK91_HUMAN;tr|E9PK09|E9PK09_HUMAN;tr|E9PQN2|E9PQN2_HUMAN;tr|E9PKI6|E9PKI6_HUMAN;tr|E9PJA7|E9PJA7_HUMAN	4850	Q9NYF8	BCLF1_HUMAN	Bcl-2-associated transcription factor 1	tf	BCLAF1
19.9316	19.131	19.222	19.2592	17.1486	18.2751				exonucleolytic nuclear-transcribed mRNA catabolic process involved in deadenylation-dependent decay;exonucleolytic trimming to generate mature 3'-end of 5.8S rRNA from tricistronic rRNA transcript (SSU-rRNA, 5.8S rRNA, LSU-rRNA);nuclear mRNA surveillance;nuclear polyadenylation-dependent mRNA catabolic process;nuclear polyadenylation-dependent rRNA catabolic process;nuclear polyadenylation-depend…	3'-5'-exoribonuclease activity;AU-rich element binding;RNA binding	cytoplasmic exosome (RNase complex);cytosol;exosome (RNase complex);nuclear exosome (RNase complex);nucleolus;nucleoplasm	RNA degradation			4	4	4	16.5	16.5	16.5	31.821	0	14.596	86124000	15	0.844292	1	1.20055	1.81852	sp|Q15024|EXOS7_HUMAN	sp|Q15024|EXOS7_HUMAN	2541	Q15024	EXOS7_HUMAN	Exosome complex component RRP42		EXOSC7
22.184	21.6439	21.0629	20.9353	20.08	20.2741				mRNA 3'-splice site recognition;mRNA processing;mRNA splicing, via spliceosome;positive regulation of neuron projection development;RNA splicing	RNA binding;zinc ion binding	catalytic step 2 spliceosome;nuclear speck;nucleoplasm;small nuclear ribonucleoprotein complex;spliceosomal complex;U2 snRNP;U2-type prespliceosome	Spliceosome			7	7	7	21.1	21.1	21.1	49.255	0	36.445	360100000	26	1.35373	1	1.20045	2.89621	sp|Q15428|SF3A2_HUMAN;tr|K7EMT0|K7EMT0_HUMAN	sp|Q15428|SF3A2_HUMAN	2602	Q15428	SF3A2_HUMAN	Splicing factor 3A subunit 2		SF3A2
17.69	19.3072	21.4268	17.8446	18.5679	18.411				establishment of endothelial intestinal barrier;negative regulation of cell migration;neutrophil degranulation;positive regulation of protein autophosphorylation;Rap protein signal transduction;regulation of protein tyrosine kinase activity	GDP binding;GTP binding;GTPase activity;transcription coactivator activity	bicellular tight junction;cell-cell contact zone;cytoplasm;cytosol;extracellular exosome;plasma membrane;recycling endosome membrane;tertiary granule membrane	Tight junction			5	1	1	31.1	4.9	4.9	20.745	0.0053813	2.461	150100000	5	0.470936	1	1.20017	1.0871	sp|Q9Y3L5|RAP2C_HUMAN;tr|A0A087X2C3|A0A087X2C3_HUMAN	sp|Q9Y3L5|RAP2C_HUMAN	5302	Q9Y3L5	RAP2C_HUMAN	Ras-related protein Rap-2c		RAP2C
20.1762	16.6835	18.5266	17.1428	16.5747	18.0683				histone H3-K4 methylation		Set1C/COMPASS complex				7	7	7	19.4	19.4	19.4	55.324	0	24.718	152500000	21	0.473585	1	1.20014	1.09235	tr|F5H8F7|F5H8F7_HUMAN;sp|Q9UBL3|ASH2L_HUMAN;tr|H0YBF6|H0YBF6_HUMAN;tr|H0YAQ0|H0YAQ0_HUMAN	tr|F5H8F7|F5H8F7_HUMAN;sp|Q9UBL3|ASH2L_HUMAN	4960	F5H8F7	F5H8F7_HUMAN			ASH2L
23.4105	21.4208	24.4135	22.2137	21.6567	21.7834				intracellular protein transport;organelle assembly;organelle localization;positive regulation of receptor localization to synapse;positive regulation of T cell mediated cytotoxicity;regulation of protein localization to plasma membrane;vesicle docking;vesicle fusion	chloride channel inhibitor activity;SNAP receptor activity;SNARE binding;syntaxin binding	azurophil granule;early endosome;early endosome membrane;endocytic vesicle;endosome;extracellular exosome;immunological synapse;integral component of membrane;late endosome;lysosomal membrane;lysosome;perinuclear region of cytoplasm;plasma membrane;recycling endosome;SNARE complex;tertiary granule;vesicle	Phagosome;SNARE interactions in vesicular transport			10	10	10	49.8	49.8	49.8	29.815	0	84.487	742270000	45	0.598138	1	1.19698	1.33675	sp|O15400|STX7_HUMAN	sp|O15400|STX7_HUMAN	375	O15400	STX7_HUMAN	Syntaxin-7		STX7
20.5906	21.006	20.9192	19.7415	19.9239	19.2618				anastral spindle assembly;astral microtubule organization;cell division;chromosome segregation;establishment of mitotic spindle orientation;meiotic cell cycle;microtubule bundle formation;nucleus organization;positive regulation of BMP signaling pathway;positive regulation of chromosome segregation;positive regulation of chromosome separation;positive regulation of hair follicle development;posit…	disordered domain specific binding;dynein complex binding;microtubule binding;microtubule minus-end binding;microtubule plus-end binding;phosphatidylinositol binding;protein complex binding;protein C-terminus binding;protein domain specific binding;structural molecule activity;tubulin binding	cell cortex;cell cortex region;centrosome;chromosome;cortical microtubule;cytoplasmic microtubule bundle;cytosol;dendrite;extracellular exosome;extrinsic component of plasma membrane;Golgi membrane;lateral cell cortex;lateral plasma membrane;microtubule bundle;microtubule minus-end;microtubule plus-end;mitotic spindle;mitotic spindle astral microtubule;mitotic spindle midzone;mitotic spindle pole…				61	61	61	41.2	41.2	41.2	238.26	0	323.31	2539400000	259	2.15635	1	1.19619	5.10122	sp|Q14980|NUMA1_HUMAN;tr|A0A087WY61|A0A087WY61_HUMAN;tr|H0YFY6|H0YFY6_HUMAN;tr|F5H4J1|F5H4J1_HUMAN;tr|F5H6Y5|F5H6Y5_HUMAN;tr|K4DIE0|K4DIE0_HUMAN;tr|F5H763|F5H763_HUMAN;tr|F5H0Z7|F5H0Z7_HUMAN;tr|F5H2F3|F5H2F3_HUMAN;tr|F5H3L6|F5H3L6_HUMAN;tr|F5H1L0|F5H1L0_HUMAN;tr|F5GZW1|F5GZW1_HUMAN;tr|F5H7R5|F5H7R5_HUMAN;tr|F5H4Y4|F5H4Y4_HUMAN;tr|F5GWA2|F5GWA2_HUMAN;tr|F5GWK2|F5GWK2_HUMAN;tr|F5H073|F5H073_HUMAN;t…	sp|Q14980|NUMA1_HUMAN;tr|A0A087WY61|A0A087WY61_HUMAN	2520	Q14980	NUMA1_HUMAN	Nuclear mitotic apparatus protein 1 {ECO:0000312|HGNC:HGNC:8059}		NUMA1
21.8239	20.9401	21.519	20.6519	19.197	20.8542				cellular response to retinoic acid;cellular response to transforming growth factor beta stimulus;cellular response to tumor necrosis factor;mRNA processing;mRNA splicing, via spliceosome;negative regulation of chaperone-mediated autophagy;negative regulation of protein refolding;positive regulation of mRNA splicing, via spliceosome;regulation of ATPase activity;regulation of RNA splicing;RNA spli…	mRNA binding;RNA binding;U1 snRNA binding;U1 snRNP binding	commitment complex;cytoplasm;nuclear speck;nucleoplasm;nucleus;precatalytic spliceosome;spliceosomal complex;U1 snRNP;U2-type prespliceosome	Spliceosome			11	11	11	34.8	34.8	34.8	51.556	0	56.451	797350000	48	0.958649	1	1.19329	2.0476	sp|P08621|RU17_HUMAN;tr|M0QYR1|M0QYR1_HUMAN;tr|M0QX04|M0QX04_HUMAN	sp|P08621|RU17_HUMAN	969	P08621	RU17_HUMAN	U1 small nuclear ribonucleoprotein 70 kDa	1 snRNP 70 kDa;1-70K;nRNP70	SNRNP70
24.4778	22.9754	23.5504	23.1626	21.742	22.5239				cellular response to glucagon stimulus;G-protein coupled receptor signaling pathway;protein folding	calcium channel regulator activity;GTPase activity;GTPase binding;protein complex binding;signal transducer activity	cell body;cytosol;extracellular exosome;extracellular space;focal adhesion;lysosomal membrane;membrane;myelin sheath;perinuclear region of cytoplasm;plasma membrane;protein complex;vesicle	Alcoholism;Apelin signaling pathway;Chemokine signaling pathway;Cholinergic synapse;Circadian entrainment;Dopaminergic synapse;GABAergic synapse;Glutamatergic synapse;Human cytomegalovirus infection;Human immunodeficiency virus 1 infection;Kaposi sarcoma-associated herpesvirus infection;Morphine addiction;Pathways in cancer;PI3K-Akt signaling pathway;Ras signaling pathway;Relaxin signaling pathwa…			13	13	8	51.2	51.2	32.9	37.331	0	246.8	1628000000	61	0.927837	1	1.19169	1.98535	sp|P62879|GBB2_HUMAN;tr|C9JXA5|C9JXA5_HUMAN;tr|C9JIS1|C9JIS1_HUMAN;tr|C9JZN1|C9JZN1_HUMAN;tr|E7EP32|E7EP32_HUMAN;sp|Q9HAV0|GBB4_HUMAN;tr|C9JD14|C9JD14_HUMAN;tr|H7C5J5|H7C5J5_HUMAN	sp|P62879|GBB2_HUMAN;tr|C9JXA5|C9JXA5_HUMAN;tr|C9JIS1|C9JIS1_HUMAN;tr|C9JZN1|C9JZN1_HUMAN;tr|E7EP32|E7EP32_HUMAN	2004	P62879	GBB2_HUMAN	Guanine nucleotide-binding protein G(I)/G(S)/G(T) subunit beta-2		GNB2
19.3105	1	18.8721	16.0211	1	18.5885				brain development;glycosylation;lysosomal lumen acidification;neurogenesis;neuron maturation;positive regulation of GTP binding;protein catabolic process;retrograde transport, endosome to Golgi;signal peptide processing	mannose binding	cytosol;endoplasmic reticulum;extracellular exosome;Golgi apparatus;integral component of membrane;lysosomal membrane;lysosome;perinuclear region of cytoplasm	Lysosome			3	3	3	8.1	8.1	8.1	41.496	0.00021683	5.2357	48857000	4	0.0501608	1	1.19102	0.146085	sp|O75503|CLN5_HUMAN;tr|A0A024R644|A0A024R644_HUMAN;tr|A0A087WZY0|A0A087WZY0_HUMAN	sp|O75503|CLN5_HUMAN;tr|A0A024R644|A0A024R644_HUMAN	599	O75503	CLN5_HUMAN	Ceroid-lipofuscinosis neuronal protein 5	rotein CLN5	CLN5
21.331	19.4207	18.6091	20.2294	18.149	17.4233				carbohydrate metabolic process	beta-N-acetylhexosaminidase activity;N-acetyl-beta-D-galactosaminidase activity					7	7	7	16.9	16.9	16.9	58.44	0	20.819	167860000	12	0.436241	1	1.18635	1.01802	tr|H3BS10|H3BS10_HUMAN;sp|P06865|HEXA_HUMAN;tr|H3BP20|H3BP20_HUMAN;tr|H3BU85|H3BU85_HUMAN;tr|H3BTD4|H3BTD4_HUMAN	tr|H3BS10|H3BS10_HUMAN;sp|P06865|HEXA_HUMAN;tr|H3BP20|H3BP20_HUMAN;tr|H3BU85|H3BU85_HUMAN;tr|H3BTD4|H3BTD4_HUMAN	924	H3BS10	H3BS10_HUMAN	Beta-hexosaminidase {ECO:0000256|PIRNR:PIRNR001093}		HEXA
18.9476	15.996	17.8147	18.8981	13.9299	16.3777				neutrophil degranulation	ATP binding	ficolin-1-rich granule membrane;mitochondrial inner membrane;mitochondrion;plasma membrane;secretory granule membrane				22	4	2	37.8	9.4	4.3	72.572	0	21.419	130430000	17	0.285736	1	1.18419	0.708175	sp|Q5T9A4|ATD3B_HUMAN	sp|Q5T9A4|ATD3B_HUMAN	2879	Q5T9A4	ATD3B_HUMAN	ATPase family AAA domain-containing protein 3B		ATAD3B
20.499	19.5195	20.4849	20.0215	16.9737	19.9565				activation of phospholipase D activity;adenylate cyclase-activating G-protein coupled receptor signaling pathway;branching involved in blood vessel morphogenesis;cell differentiation;G-protein coupled receptor signaling pathway;in utero embryonic development;movement of cell or subcellular component;platelet activation;positive regulation of apoptotic process;positive regulation of cytosolic calc…	D5 dopamine receptor binding;G-protein beta/gamma-subunit complex binding;GTP binding;GTPase activity;guanyl-nucleotide exchange factor activity;metal ion binding;Rho guanyl-nucleotide exchange factor activity;signal transducer activity;type 1 angiotensin receptor binding	brush border membrane;cytosol;extracellular exosome;focal adhesion;heterotrimeric G-protein complex;melanosome;membrane;nucleus;plasma membrane	Apelin signaling pathway;cGMP-PKG signaling pathway;Human cytomegalovirus infection;Long-term depression;Parathyroid hormone synthesis, secretion and action;Pathways in cancer;Phospholipase D signaling pathway;Platelet activation;Regulation of actin cytoskeleton;Sphingolipid signaling pathway;Vascular smooth muscle contraction			8	8	8	26	26	26	44.049	0	36.501	268680000	31	0.488014	1	1.18396	1.1209	sp|Q14344|GNA13_HUMAN	sp|Q14344|GNA13_HUMAN	2468	Q14344	GNA13_HUMAN	Guanine nucleotide-binding protein subunit alpha-13	alpha-13;-protein subunit alpha-13	GNA13
21.9876	21.2493	21.7414	19.8595	19.9446	21.6375				cellular response to hypoxia;heterochromatin organization;nucleosome assembly;regulation of cell proliferation;regulation of nucleus size;regulation of transcription, DNA-templated	DNA binding;nucleosome binding	chromosome;nuclear speck;nucleosome;nucleus				19	19	19	43.8	43.8	43.8	61.206	0	148.32	3784300000	215	0.888503	1	1.17885	1.90648	sp|Q5SSJ5|HP1B3_HUMAN;tr|X6RGJ2|X6RGJ2_HUMAN;tr|B0QZK4|B0QZK4_HUMAN;tr|Q5SWC8|Q5SWC8_HUMAN;tr|B0QZK8|B0QZK8_HUMAN;tr|B0QZK9|B0QZK9_HUMAN	sp|Q5SSJ5|HP1B3_HUMAN;tr|X6RGJ2|X6RGJ2_HUMAN;tr|B0QZK4|B0QZK4_HUMAN;tr|Q5SWC8|Q5SWC8_HUMAN	2849	Q5SSJ5	HP1B3_HUMAN	Heterochromatin protein 1-binding protein 3		HP1BP3
22.0772	19.9942	21.3323	20.1243	19.1879	20.556				angiogenesis involved in wound healing;blood coagulation, intrinsic pathway;energy homeostasis;glucose homeostasis;negative regulation of systemic arterial blood pressure;neutrophil degranulation;plasma kallikrein-kinin cascade;proteolysis;regulation of blood vessel endothelial cell migration;regulation of reactive oxygen species metabolic process;regulation of thyroid hormone mediated signaling …	dipeptidyl-peptidase activity;serine-type carboxypeptidase activity	azurophil granule membrane;basal part of cell;extracellular exosome;ficolin-1-rich granule membrane;plasma membrane	Protein digestion and absorption;Renin-angiotensin system			6	6	6	16.7	16.7	16.7	55.799	0	76.645	312830000	23	0.739408	1	1.17853	1.61217	sp|P42785|PCP_HUMAN;tr|E9PNF7|E9PNF7_HUMAN;tr|E9PL49|E9PL49_HUMAN;tr|E9PLY4|E9PLY4_HUMAN;tr|E9PQB5|E9PQB5_HUMAN;tr|E9PL85|E9PL85_HUMAN;tr|E9PNJ1|E9PNJ1_HUMAN;tr|E9PQN3|E9PQN3_HUMAN;tr|E9PKN6|E9PKN6_HUMAN;tr|E9PIG4|E9PIG4_HUMAN	sp|P42785|PCP_HUMAN	1561	P42785	PCP_HUMAN	Lysosomal Pro-X carboxypeptidase		PRCP
21.3227	19.9103	20.6545	19.7961	18.6291	19.9279				protein folding	cyclosporin A binding;peptidyl-prolyl cis-trans isomerase activity	cytoplasm;extracellular exosome				2	2	2	9.9	9.9	9.9	22.763	0	5.6894	123980000	11	0.950024	1	1.17809	2.03013	sp|P45877|PPIC_HUMAN	sp|P45877|PPIC_HUMAN	1577	P45877	PPIC_HUMAN	Peptidyl-prolyl cis-trans isomerase C	PIase C	PPIC
25.2018	23.6834	23.3494	23.4807	22.4291	22.803				intracellular cholesterol transport		intracellular				7	7	7	56.1	56.1	56.1	16.23	0	35.83	1143700000	40	0.841048	1	1.17393	1.8121	tr|J3KMY5|J3KMY5_HUMAN;sp|P61916|NPC2_HUMAN;tr|G3V3E8|G3V3E8_HUMAN;tr|E7EMS2|E7EMS2_HUMAN;tr|G3V3D1|G3V3D1_HUMAN;tr|H0YIZ1|H0YIZ1_HUMAN;tr|G3V2V8|G3V2V8_HUMAN	tr|J3KMY5|J3KMY5_HUMAN;sp|P61916|NPC2_HUMAN;tr|G3V3E8|G3V3E8_HUMAN;tr|E7EMS2|E7EMS2_HUMAN;tr|G3V3D1|G3V3D1_HUMAN;tr|H0YIZ1|H0YIZ1_HUMAN;tr|G3V2V8|G3V2V8_HUMAN	1941	J3KMY5	J3KMY5_HUMAN			NPC2
20.4559	19.7112	20.0856	18.3088	19.1551	19.2686				cellular response to stimulus;oligodendrocyte development;regulation of molecular function;response to glucose;response to heat;response to peptide hormone;translational initiation	identical protein binding;translation initiation factor activity	cytoplasm;cytosol;eukaryotic translation initiation factor 2B complex;membrane;plasma membrane	Herpes simplex virus 1 infection;RNA transport			12	12	12	44.9	44.9	44.9	33.712	0	34.987	288450000	38	1.46614	1	1.17341	3.15991	sp|Q14232|EI2BA_HUMAN;tr|F5H0D0|F5H0D0_HUMAN;tr|H0YGG4|H0YGG4_HUMAN	sp|Q14232|EI2BA_HUMAN;tr|F5H0D0|F5H0D0_HUMAN	2457	Q14232	EI2BA_HUMAN	Translation initiation factor eIF-2B subunit alpha		EIF2B1
18.5385	17.0614	18.1176	20.5395	11.8387	17.8289				fatty acid beta-oxidation;fatty acid beta-oxidation using acyl-CoA dehydrogenase	acyl-CoA dehydrogenase activity;flavin adenine dinucleotide binding;hydrolase activity	mitochondrial matrix;mitochondrion				8	8	8	11.1	11.1	11.1	118.83	0	31.73	210690000	15	0.169485	1	1.1701	0.448696	sp|Q6JQN1|ACD10_HUMAN;tr|F8W1I9|F8W1I9_HUMAN;tr|F8W1A9|F8W1A9_HUMAN;tr|D6RFF6|D6RFF6_HUMAN;tr|F8VXK4|F8VXK4_HUMAN;tr|F8W0Q4|F8W0Q4_HUMAN;tr|F8W179|F8W179_HUMAN	sp|Q6JQN1|ACD10_HUMAN;tr|F8W1I9|F8W1I9_HUMAN	2968	Q6JQN1	ACD10_HUMAN	Acyl-CoA dehydrogenase family member 10	CAD-10	ACAD10
24.0936	23.1688	23.6046	22.7113	22.2174	22.432				embryonic camera-type eye development;embryonic eye morphogenesis;face development;Harderian gland development;inner ear morphogenesis;locomotory behavior;neuromuscular process controlling balance;nucleus accumbens development;olfactory pit development;optic cup morphogenesis involved in camera-type eye development;positive regulation of apoptotic process;protein homotetramerization;retinal metab…	aldehyde dehydrogenase (NAD) activity;aldehyde dehydrogenase [NAD(P)+] activity;NAD+ binding;protein homodimerization activity;retinal dehydrogenase activity;thyroid hormone binding	cytoplasm;cytosol;extracellular exosome;nucleus;plasma membrane	beta-Alanine metabolism;Chemical carcinogenesis;Drug metabolism - cytochrome P450;Glycolysis / Gluconeogenesis;Histidine metabolism;Metabolic pathways;Metabolism of xenobiotics by cytochrome P450;Phenylalanine metabolism;Tyrosine metabolism			27	27	23	55.9	55.9	50.4	56.108	0	210.1	2434700000	131	1.74023	1	1.16877	3.85741	sp|P47895|AL1A3_HUMAN;tr|H0Y2X5|H0Y2X5_HUMAN;tr|H0YKF9|H0YKF9_HUMAN;tr|H0YNQ3|H0YNQ3_HUMAN;tr|H0YLT1|H0YLT1_HUMAN	sp|P47895|AL1A3_HUMAN;tr|H0Y2X5|H0Y2X5_HUMAN	1614	P47895	AL1A3_HUMAN	Aldehyde dehydrogenase family 1 member A3		ALDH1A3
18.7616	17.1013	19.2531	15.617	16.7454	19.262				signal transduction		cytoplasm;cytosol;plasma membrane				5	4	4	13.4	11.5	11.5	59.241	0	29.464	107630000	9	0.389866	1	1.16384	0.924595	sp|Q9BTT6|LRRC1_HUMAN;tr|Q5T0G3|Q5T0G3_HUMAN	sp|Q9BTT6|LRRC1_HUMAN	4210	Q9BTT6	LRRC1_HUMAN	Leucine-rich repeat-containing protein 1		LRRC1
21.5161	21.281	20.985	19.4979	19.7929	21.0088				blood coagulation;negative regulation of G0 to G1 transition;negative regulation of transcription from RNA polymerase II promoter;negative regulation of transcription, DNA-templated;viral process	chromatin binding;histone deacetylase binding;identical protein binding;macromolecular complex binding;methylated histone binding;protein binding, bridging;protein homodimerization activity;repressing transcription factor binding;ribonucleoprotein complex binding	chromocenter;histone deacetylase complex;histone methyltransferase complex;kinetochore;macromolecular complex;nuclear chromosome, telomeric region;nuclear envelope;nuclear heterochromatin;nuclear pericentric heterochromatin;nucleolus;nucleoplasm;nucleus;pericentric heterochromatin;ribonucleoprotein complex;transcriptional repressor complex				4	4	4	23.6	23.6	23.6	22.225	0	7.081	187840000	12	1.12044	1	1.16083	2.38252	sp|P45973|CBX5_HUMAN;tr|F8VNY3|F8VNY3_HUMAN	sp|P45973|CBX5_HUMAN;tr|F8VNY3|F8VNY3_HUMAN	1580	P45973	CBX5_HUMAN	Chromobox protein homolog 5		CBX5
20.0674	18.822	20.1044	19.9715	17.576	17.9661				acylglycerol metabolic process;CDP-diacylglycerol biosynthetic process;hematopoietic progenitor cell differentiation;phosphatidic acid biosynthetic process;phospholipid biosynthetic process	1-acylglycerol-3-phosphate O-acyltransferase activity	endoplasmic reticulum membrane;integral component of membrane;mitochondrial outer membrane;mitochondrion;nuclear envelope	Glycerolipid metabolism;Glycerophospholipid metabolism;Metabolic pathways;Phospholipase D signaling pathway			7	7	7	22.5	22.5	22.5	42.072	0	75.612	425800000	35	0.609702	1	1.16005	1.35929	sp|Q9NUQ2|PLCE_HUMAN;tr|H0YC22|H0YC22_HUMAN;tr|E5RH21|E5RH21_HUMAN	sp|Q9NUQ2|PLCE_HUMAN	4737	Q9NUQ2	PLCE_HUMAN	1-acyl-sn-glycerol-3-phosphate acyltransferase epsilon		AGPAT5
20.5652	17.4251	19.2697	18.3379	16.2968	19.1508				mRNA splicing, via spliceosome;neutrophil degranulation;positive regulation of viral genome replication;protein folding;regulation of transcription, DNA-templated;transcription-coupled nucleotide-excision repair	cyclosporin A binding;peptidyl-prolyl cis-trans isomerase activity;RNA binding	catalytic step 2 spliceosome;cytosol;extracellular region;ficolin-1-rich granule lumen;nuclear speck;nucleoplasm;nucleus;secretory granule lumen	Spliceosome			6	5	5	31.6	29.2	29.2	33.43	0	13.857	90439000	10	0.392542	1	1.15815	0.930025	sp|Q9UNP9|PPIE_HUMAN;tr|E9PKY5|E9PKY5_HUMAN;tr|E9PEQ6|E9PEQ6_HUMAN;tr|E9PIB0|E9PIB0_HUMAN;tr|E9PK21|E9PK21_HUMAN	sp|Q9UNP9|PPIE_HUMAN;tr|E9PKY5|E9PKY5_HUMAN;tr|E9PEQ6|E9PEQ6_HUMAN	5159	Q9UNP9	PPIE_HUMAN	Peptidyl-prolyl cis-trans isomerase E	PIase E	PPIE
20.5269	19.7996	19.8752	19.2267	18.6347	18.8708				bicellular tight junction assembly		bicellular tight junction;integral component of membrane				7	7	7	18.6	18.6	18.6	59.129	0	30.979	158700000	19	1.79847	1	1.15651	4.01694	tr|A0A0G2JMZ8|A0A0G2JMZ8_HUMAN;sp|Q16625|OCLN_HUMAN	tr|A0A0G2JMZ8|A0A0G2JMZ8_HUMAN;sp|Q16625|OCLN_HUMAN	2678	A0A0G2JMZ8	A0A0G2JMZ8_HUMAN			OCLN
19.32	18.5077	19.4989	17.4572	17.3346	19.0679				cis assembly of pre-catalytic spliceosome;mRNA splicing, via spliceosome;RNA secondary structure unwinding;RNA splicing;RNA splicing, via transesterification reactions	ATP binding;ATP-dependent RNA helicase activity;RNA binding	catalytic step 2 spliceosome;cytoplasm;extracellular exosome;nucleolus;nucleoplasm;nucleus;U5 snRNP	Spliceosome			23	23	23	29	29	29	95.581	0	81.076	1134500000	127	0.843115	1	1.15563	1.81619	sp|Q9BUQ8|DDX23_HUMAN;tr|H0YI52|H0YI52_HUMAN;tr|F8VVA2|F8VVA2_HUMAN	sp|Q9BUQ8|DDX23_HUMAN	4234	Q9BUQ8	DDX23_HUMAN	Probable ATP-dependent RNA helicase DDX23		DDX23
17.9697	16.8766	17.771	17.3993	15.0577	16.7001				positive regulation of proteasomal protein catabolic process;response to endoplasmic reticulum stress		endoplasmic reticulum;integral component of membrane				7	7	7	8.7	8.7	8.7	104.01	0	10.736	189620000	23	0.679749	1	1.15341	1.49574	sp|Q6ZXV5|TMTC3_HUMAN;tr|F8VRY4|F8VRY4_HUMAN;tr|F8VR71|F8VR71_HUMAN;tr|F8W044|F8W044_HUMAN	sp|Q6ZXV5|TMTC3_HUMAN	3093	Q6ZXV5	TMTC3_HUMAN	Transmembrane and TPR repeat-containing protein 3		TMTC3
23.8606	22.3397	22.9964	21.9055	21.5215	22.3101				AMP metabolic process;blood coagulation;GTP metabolic process;ITP metabolic process;UTP metabolic process	ATP binding;GTP binding;nucleoside triphosphate adenylate kinase activity	mitochondrial matrix;mitochondrion	Purine metabolism			15	15	15	67.4	67.4	67.4	25.565	0	86.837	1048400000	51	1.09362	1	1.15316	2.32597	sp|Q9UIJ7|KAD3_HUMAN	sp|Q9UIJ7|KAD3_HUMAN	5053	Q9UIJ7	KAD3_HUMAN	GTP:AMP phosphotransferase AK3, mitochondrial {ECO:0000255|HAMAP-Rule:MF_03169}		AK3
24.1286	22.2116	22.9623	22.4812	21.1113	22.2608				cell adhesion;cellular defense response;platelet degranulation;signal transduction	scavenger receptor activity	blood microparticle;extracellular exosome;extracellular matrix;extracellular region;extracellular space;membrane;platelet dense granule lumen;proteinaceous extracellular matrix				14	14	14	35.9	35.9	35.9	65.33	0	240.89	1754200000	85	0.753704	1	1.14974	1.64015	sp|Q08380|LG3BP_HUMAN;tr|K7EP36|K7EP36_HUMAN;tr|K7ESM3|K7ESM3_HUMAN;tr|K7EKQ5|K7EKQ5_HUMAN;tr|K7ERZ6|K7ERZ6_HUMAN;tr|K7EJY8|K7EJY8_HUMAN;tr|K7EJD3|K7EJD3_HUMAN;tr|K7ES75|K7ES75_HUMAN;tr|K7EN99|K7EN99_HUMAN	sp|Q08380|LG3BP_HUMAN	2232	Q08380	LG3BP_HUMAN	Galectin-3-binding protein		LGALS3BP
19.2079	17.0847	1	1	16.1927	16.6544										1	1	1	6.5	6.5	6.5	24.974	0.001003	3.5989	22966000	1	0.0511801	1	1.14853	0.148907	tr|H0YHD0|H0YHD0_HUMAN;sp|Q5PSV4|BRM1L_HUMAN	tr|H0YHD0|H0YHD0_HUMAN;sp|Q5PSV4|BRM1L_HUMAN	2838	H0YHD0	H0YHD0_HUMAN			BRMS1L
22.3499	20.6314	21.0131	21.0712	19.3422	20.1386				circadian rhythm;mRNA destabilization;mRNA processing;mRNA splicing, via spliceosome;negative regulation of catalytic activity;RNA metabolic process	mRNA 3'-UTR binding;RNA binding	axon terminus;catalytic step 2 spliceosome;dendrite;endoplasmic reticulum;growth cone;intracellular ribonucleoprotein complex;nucleoplasm;spliceosomal complex				20	15	15	41.5	34	34	70.942	0	83.008	709780000	55	0.727879	1	1.14748	1.58963	sp|O43390|HNRPR_HUMAN;tr|B4DT28|B4DT28_HUMAN	sp|O43390|HNRPR_HUMAN;tr|B4DT28|B4DT28_HUMAN	413	O43390	HNRPR_HUMAN	Heterogeneous nuclear ribonucleoprotein R	nRNP R	HNRNPR
24.3308	23.1342	23.5948	22.7603	21.9319	22.928				ATP metabolic process;cardiac muscle contraction;cell adhesion;cell communication by electrical coupling involved in cardiac conduction;cellular calcium ion homeostasis;cellular potassium ion homeostasis;cellular sodium ion homeostasis;ion transmembrane transport;leukocyte migration;membrane repolarization;membrane repolarization during cardiac muscle cell action potential;positive regulation of …	ATPase activator activity;ATPase binding;MHC class II protein complex binding;protein C-terminus binding;protein kinase binding;sodium:potassium-exchanging ATPase activity	apical plasma membrane;basolateral plasma membrane;caveola;extracellular exosome;extracellular vesicle;intercalated disc;intracellular;membrane;myelin sheath;plasma membrane;sarcolemma;sodium:potassium-exchanging ATPase complex	Adrenergic signaling in cardiomyocytes;Aldosterone synthesis and secretion;Aldosterone-regulated sodium reabsorption;Bile secretion;cAMP signaling pathway;Carbohydrate digestion and absorption;Cardiac muscle contraction;cGMP-PKG signaling pathway;Endocrine and other factor-regulated calcium reabsorption;Gastric acid secretion;Insulin secretion;Mineral absorption;Pancreatic secretion;Protein diges…			8	8	8	37.3	37.3	37.3	35.061	0	81.84	1373000000	73	1.15947	1	1.14654	2.46568	sp|P05026|AT1B1_HUMAN;tr|V9GYR2|V9GYR2_HUMAN	sp|P05026|AT1B1_HUMAN;tr|V9GYR2|V9GYR2_HUMAN	888	P05026	AT1B1_HUMAN	Sodium/potassium-transporting ATPase subunit beta-1		ATP1B1
19.6313	18.4411	18.0763	18.158	17.0095	17.5507										5	5	5	28.4	28.4	28.4	24.064	0	13.888	63839000	8	0.929743	1	1.14349	1.98919	tr|Q5SZ82|Q5SZ82_HUMAN;tr|A0A087WXU0|A0A087WXU0_HUMAN;sp|Q9NWS8|RMND1_HUMAN	tr|Q5SZ82|Q5SZ82_HUMAN;tr|A0A087WXU0|A0A087WXU0_HUMAN;sp|Q9NWS8|RMND1_HUMAN	4793	Q5SZ82	Q5SZ82_HUMAN			RMND1
20.2049	18.1193	19.3743	18.3104	17.1747	18.7931				chaperone-mediated protein folding;histone peptidyl-prolyl isomerization	calcium ion binding;FK506 binding;peptidyl-prolyl cis-trans isomerase activity	cytoplasm;endoplasmic reticulum lumen;nucleolus				10	10	10	21.3	21.3	21.3	64.244	0	17.635	155360000	19	0.668997	1	1.14007	1.47479	sp|Q96AY3|FKB10_HUMAN;tr|H0Y827|H0Y827_HUMAN;tr|K7ESG6|K7ESG6_HUMAN;tr|K7EM43|K7EM43_HUMAN;tr|K7ELI6|K7ELI6_HUMAN	sp|Q96AY3|FKB10_HUMAN;tr|H0Y827|H0Y827_HUMAN	3796	Q96AY3	FKB10_HUMAN	Peptidyl-prolyl cis-trans isomerase FKBP10	PIase FKBP10	FKBP10
20.1363	16.6918	18.2281	16.9584	16.2048	18.4775					nucleic acid binding	midbody;nucleoplasm				3	3	3	5.8	5.8	5.8	89.054	0.0011781	3.2851	144940000	7	0.401895	1	1.13848	0.948966	tr|B9EGQ5|B9EGQ5_HUMAN;tr|M0QXA7|M0QXA7_HUMAN;sp|O95785|WIZ_HUMAN	tr|B9EGQ5|B9EGQ5_HUMAN;tr|M0QXA7|M0QXA7_HUMAN;sp|O95785|WIZ_HUMAN	789	B9EGQ5	B9EGQ5_HUMAN
22.8891	22.1687	21.3806	21.5505	20.76	20.721					4 iron, 4 sulfur cluster binding;FMN binding;metal ion binding;NAD binding;NADH dehydrogenase (ubiquinone) activity	cytosol;mitochondrial inner membrane;mitochondrion;respiratory chain				19	19	19	54.9	54.9	54.9	50.054	0	97.596	835940000	56	1.04061	1	1.13569	2.21545	tr|G3V0I5|G3V0I5_HUMAN;sp|P49821|NDUV1_HUMAN;tr|B4DE93|B4DE93_HUMAN;tr|E9PQP1|E9PQP1_HUMAN;tr|E9PMX3|E9PMX3_HUMAN;tr|E9PLC6|E9PLC6_HUMAN;tr|E9PPR0|E9PPR0_HUMAN;tr|E9PJL9|E9PJL9_HUMAN;tr|H0YE81|H0YE81_HUMAN;tr|E9PPS5|E9PPS5_HUMAN;tr|H0YD04|H0YD04_HUMAN;tr|E9PPD6|E9PPD6_HUMAN	tr|G3V0I5|G3V0I5_HUMAN;sp|P49821|NDUV1_HUMAN;tr|B4DE93|B4DE93_HUMAN	1688	G3V0I5	G3V0I5_HUMAN	NADH dehydrogenase [ubiquinone] flavoprotein 1, mitochondrial {ECO:0000256|RuleBase:RU364066}
19.403	16.33	18.9048	18.5325	14.3049	18.3977										7	7	7	10.5	10.5	10.5	108.34	0	63.429	166180000	24	0.269845	1	1.1342	0.674055	tr|A0A087X0S5|A0A087X0S5_HUMAN;sp|P12109|CO6A1_HUMAN	tr|A0A087X0S5|A0A087X0S5_HUMAN;sp|P12109|CO6A1_HUMAN	1059	A0A087X0S5	A0A087X0S5_HUMAN			COL6A1
20.6364	18.0399	18.984	18.0894	17.5176	18.6516				protein folding in endoplasmic reticulum		ER membrane protein complex;integral component of membrane				11	11	11	16.1	16.1	16.1	111.76	0	35.453	242560000	32	0.616289	1	1.13389	1.37213	sp|Q8N766|EMC1_HUMAN;tr|H7C4E3|H7C4E3_HUMAN	sp|Q8N766|EMC1_HUMAN	3430	Q8N766	EMC1_HUMAN	ER membrane protein complex subunit 1		EMC1
18.185	17.3005	17.2818	16.7461	14.9625	17.6609					ATP binding;helicase activity;nucleic acid binding					15	15	15	25.8	25.8	25.8	86.604	0	111.78	629970000	65	0.598804	1	1.13261	1.33805	tr|B7Z6D5|B7Z6D5_HUMAN;sp|Q96GQ7|DDX27_HUMAN;tr|A0A087X059|A0A087X059_HUMAN;tr|A0A087WYH5|A0A087WYH5_HUMAN	tr|B7Z6D5|B7Z6D5_HUMAN;sp|Q96GQ7|DDX27_HUMAN	3901	B7Z6D5	B7Z6D5_HUMAN			DDX27
23.5051	22.2294	22.0129	21.6273	21.0302	21.7115				apoptotic process;BMP signaling pathway;cell aging;cellular response to lipopolysaccharide;epithelial to mesenchymal transition involved in cardiac fibroblast development;interleukin-12-mediated signaling pathway;negative regulation of apoptotic process;negative regulation of cell cycle;negative regulation of cytokine production involved in inflammatory response;negative regulation of JUN kinase …	RNA binding	cytoplasm;cytosol;nucleus	MicroRNAs in cancer;Proteoglycans in cancer			14	14	14	39.9	39.9	39.9	51.735	0	129.32	1000400000	51	1.03181	1	1.12615	2.19724	sp|Q53EL6|PDCD4_HUMAN;tr|Q5VZS7|Q5VZS7_HUMAN	sp|Q53EL6|PDCD4_HUMAN	2768	Q53EL6	PDCD4_HUMAN	Programmed cell death protein 4		PDCD4
22.9379	21.7029	22.5709	21.6758	20.8984	21.2603				cardiac muscle contraction;diaphragm contraction;glucose metabolic process;glycogen catabolic process;heart morphogenesis;locomotory behavior;lysosome organization;maltose metabolic process;muscle cell cellular homeostasis;neuromuscular process controlling balance;neuromuscular process controlling posture;neutrophil degranulation;regulation of the force of heart contraction;sucrose metabolic proc…	alpha-1,4-glucosidase activity;carbohydrate binding;maltose alpha-glucosidase activity;oligo-1,6-glucosidase activity	azurophil granule membrane;extracellular exosome;ficolin-1-rich granule membrane;lysosomal lumen;lysosomal membrane;lysosome;membrane;plasma membrane;tertiary granule membrane	Galactose metabolism;Lysosome;Metabolic pathways;Starch and sucrose metabolism			18	18	18	31	31	31	105.32	0	196.47	1399200000	79	1.23098	1	1.12573	2.62078	sp|P10253|LYAG_HUMAN;tr|I3L3L3|I3L3L3_HUMAN;tr|I3L0S5|I3L0S5_HUMAN	sp|P10253|LYAG_HUMAN	1015	P10253	LYAG_HUMAN	Lysosomal alpha-glucosidase		GAA
1	19.0672	20.7223	1	16.0231	20.3916				intracellular protein transport		endoplasmic reticulum;integral component of membrane				3	3	3	14.3	14.3	14.3	26.953	0	17.684	97573000	12	0.0445408	1	1.12489	0.130427	tr|C9JTE9|C9JTE9_HUMAN;sp|Q9UHQ4|BAP29_HUMAN;tr|C9JGJ9|C9JGJ9_HUMAN;tr|F8WB99|F8WB99_HUMAN;tr|C9IYK6|C9IYK6_HUMAN;tr|H7C5E2|H7C5E2_HUMAN;tr|C9JP06|C9JP06_HUMAN;tr|F8WDG1|F8WDG1_HUMAN;tr|B7Z2L0|B7Z2L0_HUMAN;tr|H0Y7N8|H0Y7N8_HUMAN	tr|C9JTE9|C9JTE9_HUMAN;sp|Q9UHQ4|BAP29_HUMAN;tr|C9JGJ9|C9JGJ9_HUMAN;tr|F8WB99|F8WB99_HUMAN;tr|C9IYK6|C9IYK6_HUMAN;tr|H7C5E2|H7C5E2_HUMAN	5029	C9JTE9	C9JTE9_HUMAN			BCAP29
19.4757	17.1583	19.1733	17.3626	16.6409	18.4382				peptide hormone processing	metalloendopeptidase activity	integral component of membrane				7	7	7	14.2	14.2	14.2	83.573	0	24.805	114770000	11	0.555206	1	1.12184	1.25292	tr|B4DKB2|B4DKB2_HUMAN;sp|P42892|ECE1_HUMAN;tr|E9PN99|E9PN99_HUMAN;tr|E9PHZ1|E9PHZ1_HUMAN	tr|B4DKB2|B4DKB2_HUMAN;sp|P42892|ECE1_HUMAN	1562	B4DKB2	B4DKB2_HUMAN			ECE1
22.0241	19.67	21.2598	22.4633	17.1607	19.9827				DNA replication;DNA replication initiation;G1/S transition of mitotic cell cycle;histone H3 acetylation;telomere maintenance via semi-conservative replication	DNA binding;DNA-directed DNA polymerase activity;protein heterodimerization activity	Ada2/Gcn5/Ada3 transcription activator complex;epsilon DNA polymerase complex;nucleoplasm;nucleus	Base excision repair;DNA replication;Nucleotide excision repair			3	3	3	30.6	30.6	30.6	16.859	0	60.424	192890000	14	0.264989	1	1.11571	0.663557	sp|Q9NRF9|DPOE3_HUMAN	sp|Q9NRF9|DPOE3_HUMAN	4688	Q9NRF9	DPOE3_HUMAN	DNA polymerase epsilon subunit 3		POLE3
19.0282	17.9945	17.6351	17.6758	15.9148	17.7243				acyl-CoA metabolic process;fatty acid metabolic process;negative regulation of protein kinase B signaling;protein kinase B signaling;regulation of mitochondrial membrane permeability involved in apoptotic process	acyl-CoA hydrolase activity;myristoyl-CoA hydrolase activity;palmitoyl-CoA hydrolase activity	cytosol;mitochondrial inner membrane;mitochondrial intermembrane space;mitochondrial matrix;mitochondrion;plasma membrane;ruffle membrane	Fatty acid elongation;PI3K-Akt signaling pathway			2	2	2	10	10	10	27.129	0.0028463	2.8206	24919000	2	0.698603	1	1.11431	1.53249	sp|Q5T1C6|THEM4_HUMAN	sp|Q5T1C6|THEM4_HUMAN	2862	Q5T1C6	THEM4_HUMAN	Acyl-coenzyme A thioesterase THEM4	cyl-CoA thioesterase THEM4	THEM4
22.0762	22.7255	22.7512	20.3735	21.8286	22.0093				apoptotic process;CTP biosynthetic process;GTP biosynthetic process;nucleobase-containing small molecule interconversion;regulation of apoptotic process;UTP biosynthetic process	ATP binding;metal ion binding;nucleoside diphosphate kinase activity	cytosol;extracellular exosome;intracellular;mitochondrion	Drug metabolism - other enzymes;Metabolic pathways;Purine metabolism;Pyrimidine metabolism			8	8	8	49.7	49.7	49.7	19.015	0	28.42	411240000	35	0.92458	1	1.11388	1.9788	sp|Q13232|NDK3_HUMAN;tr|H3BPR2|H3BPR2_HUMAN;tr|H3BPD9|H3BPD9_HUMAN;tr|H3BMQ7|H3BMQ7_HUMAN;tr|H3BRA8|H3BRA8_HUMAN	sp|Q13232|NDK3_HUMAN;tr|H3BPR2|H3BPR2_HUMAN	2327	Q13232	NDK3_HUMAN	Nucleoside diphosphate kinase 3	DK 3;DP kinase 3	NME3
21.2685	16.4527	21.1822	18.2803	16.076	21.2128				cellular response to glucose stimulus;cellular response to hypoxia;excitatory postsynaptic potential;lactation;nucleobase-containing compound metabolic process;nucleoside transport;sleep;uridine transport	nucleoside transmembrane transporter activity	apical plasma membrane;basolateral plasma membrane;integral component of plasma membrane;membrane;plasma membrane;postsynapse	Alcoholism			2	2	2	6.4	6.4	6.4	50.219	0	47.319	175760000	14	0.196025	1	1.11145	0.510226	sp|Q99808|S29A1_HUMAN	sp|Q99808|S29A1_HUMAN	4111	Q99808	S29A1_HUMAN	Equilibrative nucleoside transporter 1		SLC29A1
22.7211	21.5804	20.5748	19.2249	20.7302	21.6082						nucleolus;nucleus				11	11	11	55.7	55.7	55.7	23.864	0	194.86	2513500000	137	0.520504	1	1.10436	1.1849	sp|Q96EY4|TMA16_HUMAN;tr|H0Y9X1|H0Y9X1_HUMAN;tr|D6RA57|D6RA57_HUMAN;tr|D6RE67|D6RE67_HUMAN;tr|D6RC31|D6RC31_HUMAN	sp|Q96EY4|TMA16_HUMAN;tr|H0Y9X1|H0Y9X1_HUMAN;tr|D6RA57|D6RA57_HUMAN	3868	Q96EY4	TMA16_HUMAN	Translation machinery-associated protein 16		TMA16
20.4361	18.0044	19.0281	18.4254	17.6288	18.1044				adenylate cyclase-inhibiting G-protein coupled receptor signaling pathway;cellular response to organic substance;epithelial cell differentiation involved in prostate gland development;ganglioside GM1 transport to membrane;glycosphingolipid metabolic process;lipid transport;negative regulation of hydrogen peroxide-induced cell death;neutrophil degranulation;platelet degranulation;positive regulati…	beta-galactosidase activity;enzyme activator activity;ganglioside GM1 binding;ganglioside GM2 binding;ganglioside GM3 binding;ganglioside GP1c binding;ganglioside GT1b binding;G-protein coupled receptor binding;identical protein binding;lipid binding;phospholipid binding;protein homodimerization activity	azurophil granule membrane;extracellular exosome;extracellular matrix;extracellular region;extracellular space;integral component of membrane;intracellular membrane-bounded organelle;lysosomal lumen;lysosomal membrane;lysosome;mitochondrion;plasma membrane	Lysosome			5	5	5	14.3	14.3	14.3	58.112	0	19.38	160260000	12	0.675328	1	1.10333	1.48712	sp|P07602|SAP_HUMAN;tr|C9JIZ6|C9JIZ6_HUMAN;tr|A0A0J9YXB8|A0A0J9YXB8_HUMAN;tr|Q5BJH1|Q5BJH1_HUMAN	sp|P07602|SAP_HUMAN;tr|C9JIZ6|C9JIZ6_HUMAN	938	P07602	SAP_HUMAN	Prosaposin		PSAP
24.0678	23.8843	23.7043	22.8773	23.011	22.4582				negative regulation of cell proliferation	cadherin binding;RNA binding;zinc ion binding	cell junction;cytosol;focal adhesion;nucleus;plasma membrane;protein complex				18	18	18	54.2	54.2	54.2	47.996	0	139.53	2793800000	76	2.30322	1	1.1033	5.60537	sp|Q9UGI8|TES_HUMAN;tr|F8W7T0|F8W7T0_HUMAN;tr|H7BYK1|H7BYK1_HUMAN;tr|F8WDI4|F8WDI4_HUMAN	sp|Q9UGI8|TES_HUMAN	5000	Q9UGI8	TES_HUMAN	Testin		TES
23.2931	22.2694	22.1212	21.3842	21.2772	21.7147				bone morphogenesis;leukocyte migration;negative regulation of protein processing;negative regulation of transforming growth factor beta receptor signaling pathway;regulation of chondrocyte differentiation	fibroblast growth factor binding;receptor binding	extracellular exosome;Golgi apparatus;Golgi membrane;integral component of membrane;membrane;plasma membrane;proteinaceous extracellular matrix	Cell adhesion molecules (CAMs)			36	36	36	39.1	39.1	39.1	134.55	0	274.15	3895100000	221	1.31941	1	1.10249	2.81795	sp|Q92896|GSLG1_HUMAN;tr|H3BM42|H3BM42_HUMAN;tr|H3BQT1|H3BQT1_HUMAN;tr|H3BQU9|H3BQU9_HUMAN;tr|H3BRD8|H3BRD8_HUMAN	sp|Q92896|GSLG1_HUMAN;tr|H3BM42|H3BM42_HUMAN	3733	Q92896	GSLG1_HUMAN	Golgi apparatus protein 1		GLG1
23.7638	23.309	22.9314	22.5432	21.6279	22.5332				cristae formation;inner mitochondrial membrane organization;mitochondrial fusion;negative regulation of transcription from RNA polymerase II promoter;transcription, DNA-templated	phosphatase binding;protein complex scaffold activity;transcriptional repressor activity, RNA polymerase II transcription regulatory region sequence-specific DNA binding	cytoplasm;extracellular exosome;MICOS complex;mitochondrial inner membrane;mitochondrion;nucleus				7	7	7	28.2	28.2	28.2	26.152	0	56.338	1042400000	41	1.32922	1	1.09993	2.8402	sp|Q9NX63|MIC19_HUMAN;tr|C9JRZ6|C9JRZ6_HUMAN;tr|F8WAR4|F8WAR4_HUMAN;tr|F8WD73|F8WD73_HUMAN	sp|Q9NX63|MIC19_HUMAN;tr|C9JRZ6|C9JRZ6_HUMAN;tr|F8WAR4|F8WAR4_HUMAN	4818	Q9NX63	MIC19_HUMAN	MICOS complex subunit MIC19		CHCHD3
21.6848	20.5081	19.6735	19.4072	19.8223	19.3403						nuclear body;nucleoplasm				5	5	5	27.7	27.7	27.7	28.683	0	41.632	209700000	29	0.84691	1	1.0989	1.82371	tr|A0A087WT99|A0A087WT99_HUMAN;sp|Q9H0W9|CK054_HUMAN;tr|E9PPB5|E9PPB5_HUMAN;tr|E9PQS1|E9PQS1_HUMAN;tr|E9PR95|E9PR95_HUMAN;tr|E9PSC3|E9PSC3_HUMAN;tr|E9PLC5|E9PLC5_HUMAN;tr|E9PLB3|E9PLB3_HUMAN;tr|E9PIP1|E9PIP1_HUMAN;tr|E9PJU8|E9PJU8_HUMAN	tr|A0A087WT99|A0A087WT99_HUMAN;sp|Q9H0W9|CK054_HUMAN;tr|E9PPB5|E9PPB5_HUMAN;tr|E9PQS1|E9PQS1_HUMAN;tr|E9PR95|E9PR95_HUMAN;tr|E9PSC3|E9PSC3_HUMAN;tr|E9PLC5|E9PLC5_HUMAN;tr|E9PLB3|E9PLB3_HUMAN;tr|E9PIP1|E9PIP1_HUMAN	4404	A0A087WT99	A0A087WT99_HUMAN			C11orf54
22.1449	21.2729	21.8835	20.7135	20.4733	20.8185				neutrophil degranulation;proteolysis	dipeptidyl-peptidase activity;serine-type peptidase activity	azurophil granule lumen;cytosol;extracellular exosome;extracellular region;Golgi apparatus;intracellular membrane-bounded organelle;vesicle				14	14	14	47.4	47.4	47.4	54.341	0	129.27	523470000	37	1.7759	1	1.09873	3.9546	sp|Q9UHL4|DPP2_HUMAN;tr|R4GMR2|R4GMR2_HUMAN;tr|R4GNE8|R4GNE8_HUMAN;tr|R4GN05|R4GN05_HUMAN;tr|R4GMU5|R4GMU5_HUMAN;tr|R4GMV4|R4GMV4_HUMAN	sp|Q9UHL4|DPP2_HUMAN	5026	Q9UHL4	DPP2_HUMAN	Dipeptidyl peptidase 2		DPP7
21.2457	19.1875	19.7588	18.2538	18.088	20.5552				ADP transport;apoptotic mitochondrial changes;generation of precursor metabolites and energy;mitochondrial genome maintenance;negative regulation of necroptotic process;regulation of insulin secretion;regulation of mitochondrial membrane permeability;transport;viral process	adenine transmembrane transporter activity;ATP:ADP antiporter activity	integral component of mitochondrial membrane;integral component of plasma membrane;mitochondrial inner membrane;mitochondrion;myelin sheath;nucleus	Calcium signaling pathway;Cellular senescence;cGMP-PKG signaling pathway;Human T-cell leukemia virus 1 infection;Huntington disease;Influenza A;Necroptosis;Parkinson disease			15	4	4	51.7	13.4	13.4	33.064	0	14.346	488370000	39	0.47379	1	1.09836	1.09276	sp|P12235|ADT1_HUMAN;tr|V9GYG0|V9GYG0_HUMAN;sp|Q9H0C2|ADT4_HUMAN	sp|P12235|ADT1_HUMAN;tr|V9GYG0|V9GYG0_HUMAN	1061	P12235	ADT1_HUMAN	ADP/ATP translocase 1		SLC25A4
20.3585	19.7823	20.5641	19.2319	17.8905	20.2893						integral component of membrane				8	8	8	17.8	17.8	17.8	72.54	0	31.317	198590000	25	0.681267	1	1.09773	1.49869	tr|A0A0C4DFM1|A0A0C4DFM1_HUMAN;sp|Q92544|TM9S4_HUMAN;tr|F8WCN2|F8WCN2_HUMAN;tr|F2Z2L1|F2Z2L1_HUMAN	tr|A0A0C4DFM1|A0A0C4DFM1_HUMAN;sp|Q92544|TM9S4_HUMAN	3676	A0A0C4DFM1	A0A0C4DFM1_HUMAN	Transmembrane 9 superfamily member {ECO:0000256|RuleBase:RU363079}
18.066	20.3878	17.7169	18.4189	16.7491	17.7128						integral component of membrane				10	10	10	8.6	8.6	8.6	151.72	0	39.392	230250000	18	0.494161	1	1.09664	1.13304	tr|G3V599|G3V599_HUMAN;sp|O15320|CTGE5_HUMAN;sp|Q96RT6|CTGE2_HUMAN;sp|Q8IX94|CTGE4_HUMAN;sp|Q86UF2|CTGE6_HUMAN;sp|P0CG41|CTGE8_HUMAN;sp|A4D2H0|CTGEF_HUMAN;tr|G3V3C4|G3V3C4_HUMAN;tr|G3V5K6|G3V5K6_HUMAN;sp|Q8IX95|CTGE3_HUMAN;sp|Q96PC5|MIA2_HUMAN;sp|A4FU28|CTGE9_HUMAN	tr|G3V599|G3V599_HUMAN;sp|O15320|CTGE5_HUMAN;sp|Q96RT6|CTGE2_HUMAN	5550	G3V599	G3V599_HUMAN			CTAGE5
23.8077	21.7479	23.3691	22.7421	20.1449	22.7534				antigen processing and presentation of exogenous peptide antigen via MHC class I, TAP-dependent;antigen processing and presentation of exogenous peptide antigen via MHC class I, TAP-independent;antigen processing and presentation of peptide antigen via MHC class I;interferon-gamma-mediated signaling pathway;regulation of immune response;type I interferon signaling pathway;viral process	peptide antigen binding	cell surface;early endosome membrane;endoplasmic reticulum;ER to Golgi transport vesicle membrane;Golgi apparatus;Golgi membrane;integral component of lumenal side of endoplasmic reticulum membrane;MHC class I protein complex;phagocytic vesicle membrane;plasma membrane;recycling endosome membrane				13	9	3	42.5	32.6	6.4	40.414	0	240.48	1301800000	56	0.438733	1	1.09474	1.023	sp|P30483|1B45_HUMAN;sp|P30488|1B50_HUMAN;sp|P30487|1B49_HUMAN;sp|P30481|1B44_HUMAN;sp|P30485|1B47_HUMAN	sp|P30483|1B45_HUMAN;sp|P30488|1B50_HUMAN;sp|P30487|1B49_HUMAN;sp|P30481|1B44_HUMAN;sp|P30485|1B47_HUMAN	1384	P30483	1B45_HUMAN	HLA class I histocompatibility antigen, B-45 alpha chain		HLA-B
22.5925	1	22.3962	20.3036	1	21.4036				intrinsic apoptotic signaling pathway in response to oxidative stress;L-glutamate transport;negative regulation of L-glutamate transport;negative regulation of mitochondrial membrane potential;positive regulation of apoptotic process;positive regulation of cysteine-type endopeptidase activity involved in apoptotic process;positive regulation of stress-activated MAPK cascade		cytoskeleton;endoplasmic reticulum membrane;extracellular exosome;integral component of membrane;membrane;plasma membrane				4	4	4	20.2	20.2	20.2	21.614	0	55.962	167000000	13	0.0380307	1	1.09381	0.112085	sp|O75915|PRAF3_HUMAN;tr|F8WF90|F8WF90_HUMAN;tr|C9JQU6|C9JQU6_HUMAN;tr|F8WF33|F8WF33_HUMAN	sp|O75915|PRAF3_HUMAN	649	O75915	PRAF3_HUMAN	PRA1 family protein 3		ARL6IP5
18.414	17.6846	16.6552	17.9946	15.6489	15.8335				intra-Golgi vesicle-mediated transport		Golgi apparatus;Golgi membrane;integral component of Golgi membrane;nucleoplasm				14	14	14	28.5	28.5	28.5	77.454	0	53.005	273540000	30	0.52864	1	1.09231	1.20088	sp|Q13948|CASP_HUMAN;sp|P39880|CUX1_HUMAN	sp|Q13948|CASP_HUMAN;sp|P39880|CUX1_HUMAN	2423	Q13948	CASP_HUMAN	Protein CASP		CUX1
18.6618	18.6858	19.1678	18.6183	17.9578	16.6668				phosphatidylinositol biosynthetic process;phosphatidylinositol dephosphorylation	phosphatase activity;phosphatidylinositol bisphosphate phosphatase activity;phosphatidylinositol phosphate 4-phosphatase activity;phosphatidylinositol-3-phosphatase activity;phosphatidylinositol-4-phosphate phosphatase activity	AMPA glutamate receptor complex;endoplasmic reticulum membrane;Golgi apparatus;Golgi membrane;integral component of endoplasmic reticulum membrane	Inositol phosphate metabolism;Metabolic pathways;Phosphatidylinositol signaling system			9	9	9	17.4	17.4	17.4	66.966	0	26.823	140180000	16	0.849731	1	1.09083	1.82931	sp|Q9NTJ5|SAC1_HUMAN;tr|E9PGZ4|E9PGZ4_HUMAN;tr|C9JV50|C9JV50_HUMAN;tr|F8WDN7|F8WDN7_HUMAN;tr|F8WCQ2|F8WCQ2_HUMAN;tr|C9J3E3|C9J3E3_HUMAN	sp|Q9NTJ5|SAC1_HUMAN;tr|E9PGZ4|E9PGZ4_HUMAN	4721	Q9NTJ5	SAC1_HUMAN	Phosphatidylinositide phosphatase SAC1		SACM1L
20.2921	1	17.0778	17.1261	1	16.9761				acylglycerol acyl-chain remodeling;diacylglycerol metabolic process;fatty acid homeostasis;lipid storage;long-chain fatty-acyl-CoA metabolic process;neutrophil degranulation;triglyceride biosynthetic process;triglyceride metabolic process;very-low-density lipoprotein particle assembly	2-acylglycerol O-acyltransferase activity;diacylglycerol O-acyltransferase activity;retinol O-fatty-acyltransferase activity;transferase activity, transferring acyl groups	endoplasmic reticulum membrane;integral component of membrane;plasma membrane;specific granule membrane	Fat digestion and absorption;Glycerolipid metabolism;Metabolic pathways;Retinol metabolism			5	5	5	15.4	15.4	15.4	55.278	0	23.232	190730000	17	0.0464983	1	1.08923	0.135899	sp|O75907|DGAT1_HUMAN;tr|A0A0A0MR74|A0A0A0MR74_HUMAN	sp|O75907|DGAT1_HUMAN;tr|A0A0A0MR74|A0A0A0MR74_HUMAN	647	O75907	DGAT1_HUMAN	Diacylglycerol O-acyltransferase 1		DGAT1
24.0812	22.691	23.3525	22.8625	21.5389	22.4629				fatty acid beta-oxidation	isomerase activity;receptor binding	extracellular exosome;membrane;mitochondrion;peroxisome	Peroxisome			12	12	9	59.1	59.1	42.7	35.816	0	323.31	1414600000	81	0.903724	1	1.08679	1.93693	sp|Q13011|ECH1_HUMAN;tr|M0R248|M0R248_HUMAN;tr|M0QZW4|M0QZW4_HUMAN;tr|M0R280|M0R280_HUMAN;tr|M0QXS7|M0QXS7_HUMAN	sp|Q13011|ECH1_HUMAN;tr|M0R248|M0R248_HUMAN	2294	Q13011	ECH1_HUMAN	Delta(3,5)-Delta(2,4)-dienoyl-CoA isomerase, mitochondrial		ECH1
23.6701	22.1311	23.4743	22.8282	20.3631	22.8295				branched-chain amino acid catabolic process;valine catabolic process	3-hydroxyisobutyrate dehydrogenase activity;NAD binding;phosphogluconate dehydrogenase (decarboxylating) activity	mitochondrial matrix	Metabolic pathways;Valine, leucine and isoleucine degradation			9	9	9	44.9	44.9	44.9	35.329	0	125.1	946570000	53	0.496474	1	1.08489	1.1376	sp|P31937|3HIDH_HUMAN;tr|H7BZL2|H7BZL2_HUMAN	sp|P31937|3HIDH_HUMAN	1411	P31937	3HIDH_HUMAN	3-hydroxyisobutyrate dehydrogenase, mitochondrial	IBADH	HIBADH
17.424	1	17.2479	16.4665	14.9542	1				developmental process;mRNA processing;nucleocytoplasmic transport;regulation of alternative mRNA splicing, via spliceosome;RNA splicing	mRNA binding;RNA binding	intracellular ribonucleoprotein complex;nuclear speck;nucleoplasm;nucleus				9	9	9	15.8	15.8	15.8	66.389	0	34.81	213630000	34	0.0507171	1	1.0837	0.147626	sp|Q9H0G5|NSRP1_HUMAN;tr|A0A024QZ33|A0A024QZ33_HUMAN;tr|K7ERM9|K7ERM9_HUMAN;tr|J3KT62|J3KT62_HUMAN;tr|K7EQJ6|K7EQJ6_HUMAN;tr|J3QLV5|J3QLV5_HUMAN;tr|J3QRI6|J3QRI6_HUMAN;tr|K7EMD8|K7EMD8_HUMAN	sp|Q9H0G5|NSRP1_HUMAN;tr|A0A024QZ33|A0A024QZ33_HUMAN	4389	Q9H0G5	NSRP1_HUMAN	Nuclear speckle splicing regulatory protein 1		NSRP1
24.3132	21.7911	22.2143	22.9894	20.6574	21.4413				cellular protein modification process;glycoprotein catabolic process;negative regulation of cell proliferation;post-translational protein modification;protein polyubiquitination;protein ubiquitination;proteolysis;regulation of protein ubiquitination;SCF-dependent proteasomal ubiquitin-dependent protein catabolic process;ubiquitin-dependent ERAD pathway	amyloid-beta binding;carbohydrate binding;ubiquitin-protein transferase activity	cytoplasm;cytosol;dendritic spine;endoplasmic reticulum;extracellular exosome;organelle membrane;SCF ubiquitin ligase complex	Protein processing in endoplasmic reticulum;Ubiquitin mediated proteolysis			7	7	7	32.8	32.8	32.8	33.327	0	82.075	868460000	30	0.445933	1	1.07681	1.03738	sp|Q9UK22|FBX2_HUMAN;tr|R4GNH2|R4GNH2_HUMAN	sp|Q9UK22|FBX2_HUMAN	5075	Q9UK22	FBX2_HUMAN	F-box only protein 2		FBXO2
17.9602	18.3659	19.4402	16.6059	18.0608	17.8698				adherens junction maintenance;bundle of His cell-Purkinje myocyte adhesion involved in cell communication;cardiac muscle cell action potential;cardiac muscle cell action potential involved in contraction;cell communication by electrical coupling involved in cardiac conduction;cell-cell adhesion;cell-cell signaling involved in cardiac conduction;cornification;desmosome assembly;gap junction assemb…	alpha-catenin binding;cadherin binding;cell adhesive protein binding involved in bundle of His cell-Purkinje myocyte communication;intermediate filament binding;ion channel binding;protein complex scaffold activity;protein kinase C binding;sodium channel regulator activity	adherens junction;cell junction;cell-cell junction;cornified envelope;desmosome;integral component of membrane;intercalated disc;intermediate filament;nucleoplasm;nucleus;plasma membrane	Arrhythmogenic right ventricular cardiomyopathy (ARVC)			13	13	13	19.2	19.2	19.2	97.414	0	37.303	322120000	27	0.781785	1	1.0766	1.69522	sp|Q99959|PKP2_HUMAN;tr|B8QGS9|B8QGS9_HUMAN;tr|A0A087WXY2|A0A087WXY2_HUMAN	sp|Q99959|PKP2_HUMAN;tr|B8QGS9|B8QGS9_HUMAN	4121	Q99959	PKP2_HUMAN	Plakophilin-2		PKP2
22.7536	21.2978	21.1718	21.2223	20.4026	20.3712				angiogenesis;cell death;cellular iron ion homeostasis;cellular response to arsenic-containing substance;cellular response to cadmium ion;cellular response to cisplatin;cellular response to heat;cellular response to hypoxia;cellular response to nutrient;endothelial cell proliferation;erythrocyte homeostasis;excretion;heme catabolic process;heme oxidation;intracellular signal transduction;intrinsic…	enzyme binding;heme binding;heme oxygenase (decyclizing) activity;metal ion binding;phospholipase D activity;protein homodimerization activity;signal transducer activity	caveola;cytosol;endoplasmic reticulum;endoplasmic reticulum membrane;extracellular space;membrane;nucleolus;nucleus;perinuclear region of cytoplasm	Ferroptosis;Fluid shear stress and atherosclerosis;Hepatocellular carcinoma;HIF-1 signaling pathway;Metabolic pathways;MicroRNAs in cancer;Mineral absorption;Pathways in cancer;Porphyrin and chlorophyll metabolism			9	9	9	44.8	44.8	44.8	32.818	0	79.62	315070000	24	0.864113	1	1.0757	1.85787	sp|P09601|HMOX1_HUMAN;tr|B1AHA8|B1AHA8_HUMAN	sp|P09601|HMOX1_HUMAN;tr|B1AHA8|B1AHA8_HUMAN	994	P09601	HMOX1_HUMAN	Heme oxygenase 1	O-1	HMOX1
19.4533	16.7614	18.9426	17.7404	15.5855	18.6095				interferon-gamma-mediated signaling pathway;microtubule cytoskeleton organization;negative regulation of microtubule depolymerization;pattern specification process;positive regulation of stress-activated MAPK cascade;protein localization to microtubule	identical protein binding;microtubule binding;phosphoprotein binding;protein heterodimerization activity;protein homodimerization activity;transferase activity;ubiquitin protein ligase binding;zinc ion binding	cytosol;microtubule;microtubule associated complex;spindle	Ubiquitin mediated proteolysis			5	5	5	10.2	10.2	10.2	75.25	0	10.829	79510000	7	0.367997	1	1.07396	0.880005	sp|O15344|TRI18_HUMAN;tr|C9J453|C9J453_HUMAN;tr|A0A087X255|A0A087X255_HUMAN;tr|C9JZJ7|C9JZJ7_HUMAN;tr|A0A087X0X0|A0A087X0X0_HUMAN	sp|O15344|TRI18_HUMAN;tr|C9J453|C9J453_HUMAN;tr|A0A087X255|A0A087X255_HUMAN;tr|C9JZJ7|C9JZJ7_HUMAN;tr|A0A087X0X0|A0A087X0X0_HUMAN	364	O15344	TRI18_HUMAN	E3 ubiquitin-protein ligase Midline-1		MID1
22.1456	21.1066	21.6016	20.7854	20.1003	20.7561										12	12	12	39.5	39.5	39.5	42.846	0	117.93	547640000	47	1.33836	1	1.07066	2.86104	tr|A0A087WXI1|A0A087WXI1_HUMAN;sp|Q6NVY1|HIBCH_HUMAN;tr|B9A058|B9A058_HUMAN;tr|F8W8A6|F8W8A6_HUMAN;tr|H7C1A5|H7C1A5_HUMAN;tr|B8ZZZ0|B8ZZZ0_HUMAN;tr|H7C126|H7C126_HUMAN;tr|H7BYI7|H7BYI7_HUMAN;tr|H7C400|H7C400_HUMAN	tr|A0A087WXI1|A0A087WXI1_HUMAN;sp|Q6NVY1|HIBCH_HUMAN;tr|B9A058|B9A058_HUMAN	2982	A0A087WXI1
[truncated: 4,003 more rows]

## Sheet: HCT116_Signproteins_3DsiKvssiC
3D siKRAS 3	3D siKRAS 1	3D siKRAS 2	3D NT 3	3D NT 1	3D NT 2	C: Only identified by site	C: Reverse	C: Potential contaminant	C: GOBP name	C: GOMF name	C: GOCC name	C: KEGG pathway name	C: Student's T-test Significant 3D siKRAS_3D NT	C: Student's T-test significant	N: Peptides	N: Razor + unique peptides	N: Unique peptides	N: Sequence coverage [%]	N: Unique + razor sequence coverage [%]	N: Unique sequence coverage [%]	N: Mol. weight [kDa]	N: Q-value	N: Score	N: Intensity	N: MS/MS Count	N: -Log Student's T-test p-value 3D siKRAS_3D NT	N: Student's T-test q-value 3D siKRAS_3D NT	N: Student's T-test Difference 3D siKRAS_3D NT	N: Student's T-test Test statistic 3D siKRAS_3D NT	T: Protein IDs	T: Majority protein IDs	T: id	T: Uniprot IDs	T: Uniprot name	T: Uniprot full protein name	T: Uniprot short protein name	T: Gene name
22.4858	21.2949	20.7507	1	1	1				ATP biosynthetic process;cristae formation;mitochondrial ATP synthesis coupled proton transport;proton transport	transmembrane transporter activity	extracellular exosome;integral component of membrane;mitochondrial inner membrane;mitochondrial proton-transporting ATP synthase complex;mitochondrial proton-transporting ATP synthase complex, coupling factor F(o);mitochondrion;nucleoplasm;nucleus	Metabolic pathways;Oxidative phosphorylation;Thermogenesis			3	1	1	39.4	13.8	13.8	10.918	0.0010079	3.6725	168510000	10	5.63332	1	20.5105	40.0328	sp|P56134|ATPK_HUMAN;tr|C9JU26|C9JU26_HUMAN	sp|P56134|ATPK_HUMAN;tr|C9JU26|C9JU26_HUMAN	1859	P56134	ATPK_HUMAN	ATP synthase subunit f, mitochondrial		ATP5J2
[truncated: 65 more rows]

## Sheet: SW480_Allproteins_3DsiKvssiC
3D siKRAS 1	3D siKRAS 2	3D NT 1	3D NT 2	C: Only identified by site	C: Reverse	C: Potential contaminant	C: GOBP name	C: GOMF name	C: GOCC name	C: KEGG pathway name	C: Student's T-test Significant 3D siKRAS_3D NT	C: Student's T-test significant	N: Peptides	N: Razor + unique peptides	N: Unique peptides	N: Sequence coverage [%]	N: Unique + razor sequence coverage [%]	N: Unique sequence coverage [%]	N: Mol. weight [kDa]	N: Q-value	N: Score	N: Intensity	N: MS/MS Count	N: -Log Student's T-test p-value 3D siKRAS_3D NT	N: Student's T-test q-value 3D siKRAS_3D NT	N: Student's T-test Difference 3D siKRAS_3D NT	N: Student's T-test Test statistic 3D siKRAS_3D NT	T: Protein IDs	T: Majority protein IDs	T: id	T: Uniprot IDs	T: Uniprot name	T: Uniprot full protein name	T: Uniprot short protein name	T: Gene name
[truncated: 2,946 more rows]

[truncated: 3 more sheets: SW480_Signproteins_3DsiKvssiC, LS174T_Allproteins_3DsiKvssiC, LS174T_Signproteins_3DsiKvssiC]
